# Supplementary material
Source: PubMed Central journal article supplement (PMC7688854)
Supplement: 12298_2020_902_MOESM1_ESM.pdf [file 12298_2020_902_MOESM1_ESM.pdf]

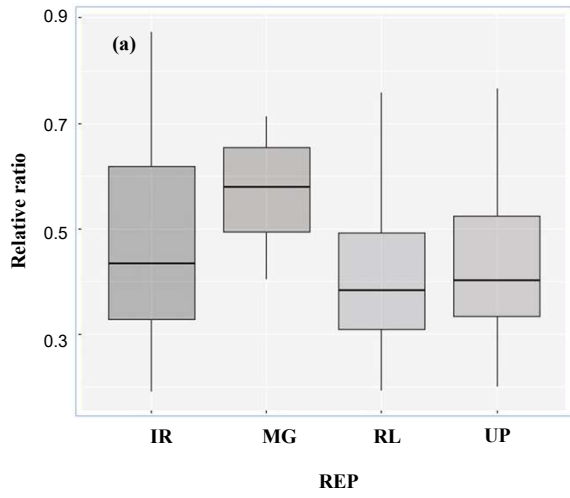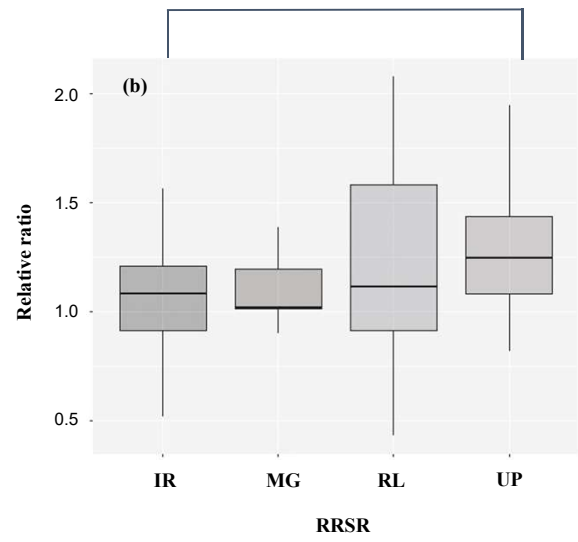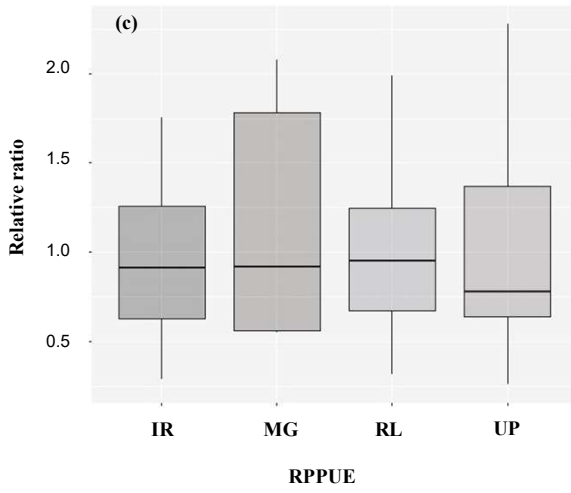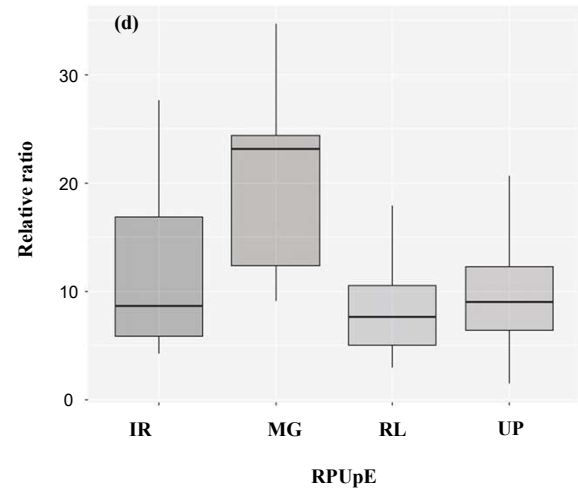

**Supplement figure 3** Phenotypic heterogeneity among irrigate (IR), mangrove (MG), rainfed lowland (RL) and upland (UP) agrosystems under Pi starvation conditions. Data was presented by values of REP (a), RRSR (b), RPPUE (c) and RPUPE (d) traits. The differences in REP, RRSR, RPPUE and RPUPE traits in four sub-populations were analyzed using the ANOVA and Student's *t*-test. Asterisk (\*) indicates the significant difference with *p*-value <0.05.
