# Supplementary material
Source: PubMed Central journal article supplement (PMC7688854)
Supplement: 12298_2020_902_MOESM2_ESM.pdf [file 12298_2020_902_MOESM2_ESM.pdf]

**Table 1. List of the 157 rice accessions used in the experiment**

| Accession | Genebank ID | Name                  | Province      | Type | Ecosy | Group | Sub pop |
|-----------|-------------|-----------------------|---------------|------|-------|-------|---------|
| G1        | VNPRC_11    | TEP HAI PHONG         | Hai Phong     | TRAD | na    | I     | Im      |
| G10       | VNPRC_216   | TAM SON NAM DINH      | Nam Dinh      | TRAD | na    | I     | I4      |
| G100      | VNPRC_6969  | KHAU QUAI DANG 2      | TuyenQuang    | TRAD | UP    | I     | J1      |
| G101      | VNPRC_7295  | DIEO KBIN             | Tay Nguyen    | TRAD | na    | J     | J1      |
| G102      | VNPRC_7303  | TZO KOH DANG 2        | ThuaThien Hue | TRAD | na    | I     | Im      |
| G103      | VNPRC_7304  | CU PUA DANG 1         | ThuaThien Hue | TRAD | na    | J     | Jm      |
| G104      | VNPRC_7305  | CU PUA DANG 2         | ThuaThien Hue | TRAD | na    | I     | Im      |
| G105      | VNPRC_7312  | NEP THAI LAN          | Ha Giang      | TRAD | na    | I     | I3      |
| G106      | VNPRC_7316  | NEP HAI HAU           | NinhBinh      | TRAD | IR    | J     | J2      |
| G107      | VNPRC_7317  | NEP THAI BINH LUN     | NinhBinh      | TRAD | IR    | J     | J2      |
| G108      | VNPRC_7318  | TAM AP BE             | NinhBinh      | TRAD | IR    | m     | m       |
| G109      | VNPRC_7349  | MANH GIE              | QuangBinh     | TRAD | UP    | I     | Im      |
| G11       | VNPRC_219   | TAM TRON HAI DUONG    | Hai Duong     | TRAD | na    | I     | I4      |
| G110      | VNPRC_7823  | RAN TRANG             | BinhThuan     | TRAD | UP    | I     | Im      |
| G111      | VNPRC_7824  | NEP RAY               | BinhThuan     | TRAD | UP    | I     | Im      |
| G113      | VNPRC_7827  | NANG THIET            | Vung Tau      | TRAD | IR    | I     | I2      |
| G115      | VNPRC_7910  | KOI LOI               | na            | TRAD | na    | I     | Im      |
| G117      | VNPRC_7930  | KHAO SANG             | Quang Tri     | TRAD | UP    | J     | Jm      |
| G119      | VNPRC_9198  | L26                   | na            | IMP  | na    | I     | Im      |
| G12       | VNPRC_226   | TAM CAO VINH PHUC     | VinhPhuc      | TRAD | na    | I     | I4      |
| G124      | VNPRC_9355  | NEP DEN               | QuangNinh     | TRAD | IR    | J     | J2      |
| G125      | VNPRC_9356  | NEP NUONG             | QuangNinh     | TRAD | na    | I     | Im      |
| G126      | VNPRC_9466  | KHAU DAM DOI          | Nghe An       | TRAD | UP    | J     | J1      |
| G128      | VNPRC_9476  | KHAU DAM              | Nghe An       | TRAD | UP    | J     | J1      |
| G129      | VNPRC_9507  | LC93-2                | KhanhHoa      | TRAD | UP    | I     | Im      |
| G130      | VNPRC_9509  | LUA DA BO             | KhanhHoa      | TRAD | UP    | J     | J3      |
| G131      | VNPRC_9517  | PADAI LONG KHANH      | KhanhHoa      | TRAD | UP    | J     | J3      |
| G132      | VNPRC_9520  | PADAI TLIG JUG        | KhanhHoa      | TRAD | UP    | I     | Im      |
| G133      | VNPRC_9524  | A 330                 | KhanhHoa      | IMP  | IR    | I     | I1      |
| G134      | VNPRC_9530  | PADAI CALOC           | KhanhHoa      | TRAD | UP    | J     | Jm      |
| G138      | VNPRC_9563  | NANG QUAT             | Ben Tre       | TRAD | RL    | I     | Im      |
| G14       | VNPRC_318   | TAM NHO BAC NINH      | Bac Ninh      | TRAD | na    | I     | I4      |
| G140      | VNPRC_9570  | LUA BAY DANH          | Ben Tre       | TRAD | RL    | I     | I2      |
| G143      | VNPRC_9576  | NEP TROI CHO          | Ben Tre       | TRAD | RL    | I     | I2      |
| G146      | VNPRC_9584  | NANG LOAN HAT TRON    | Ben Tre       | TRAD | RL    | I     | I2      |
| G147      | VNPRC_9585  | LUA NANG LOAN HAT DAI | Ben Tre       | TRAD | IR    | I     | I2      |
| G150      | VNPRC_9595  | NEP DIA PHUONG        | Ben Tre       | TRAD | IR    | I     | I2      |
| G152      | VNPRC_9871  | LOC SOM               | Bac Giang     | TRAD | na    | J     | J1      |
| G154      | VNPRC_9878  | NEP THOM              | Ha Tay        | TRAD | IR    | J     | J2      |
| G155      | VNPRC_9908  | KHAU PE LANH          | Son La        | TRAD | UP    | I     | I3      |
| G156      | VNPRC_9967  | LUA K                 | na            | TRAD | na    | I     | Im      |

|      |             |                        |           |      |    |   |    |
|------|-------------|------------------------|-----------|------|----|---|----|
| G157 | VNPRC_9984  | SO CRIOONG             | Sekong    | TRAD | na | J | Jm |
| G158 | VNPRC_12049 | VA TAI ANA ACU         | NinhThuan | TRAD | UP | J | J3 |
| G16  | VNPRC_384   | NEP VAN RUONG HOA BINH | HoaBinh   | TRAD | na | J | J2 |
| G160 | VNPRC_12059 | JASMINE                | An Giang  | IMP  | UP | I | Im |
| G161 | VNPRC_12066 | BN1                    | An Giang  | IMP  | IR | I | Im |
| G165 | VNPRC_12083 | GIONG 90 NGAY          | KienGiang | TRAD | RL | I | I1 |
| G167 | VNPRC_12088 | THAN NONG MUA          | KienGiang | TRAD | RL | I | I2 |
| G168 | VNPRC_12101 | OM1490                 | KienGiang | IMP  | IR | I | I1 |
| G169 | VNPRC_12102 | JASMINE 95             | KienGiang | IMP  | IR | I | I1 |
| G17  | VNPRC_394   | NEP GA GAY HAI DUONG   | Hai Duong | TRAD | na | I | Im |
| G170 | VNPRC_12103 | OM 504 JAPAN           | KienGiang | IMP  | IR | I | I1 |
| G171 | VNPRC_12104 | NEP THAI               | KienGiang | TRAD | IR | I | I1 |
| G172 | VNPRC_12105 | VND 95-20              | KienGiang | IMP  | IR | I | I1 |
| G173 | VNPRC_12107 | TAM THOM TRUNG QUOC    | KienGiang | TRAD | IR | I | Im |
| G177 | VNPRC_12563 | CHAM HOM               | HoaBinh   | TRAD | na | J | J1 |
| G178 | VNPRC_12573 | KHAU CHINH PHU         | HoaBinh   | TRAD | na | J | J1 |
| G179 | VNPRC_12581 | BLAO PU LAU            | HoaBinh   | TRAD | na | J | J1 |
| G18  | VNPRC_407   | NEP QUYT HAI DUONG     | Hai Duong | TRAD | na | I | I4 |
| G181 | VNPRC_12970 | BLAU PLAN PIENG        | Son La    | TRAD | UP | I | I6 |
| G182 | VNPRC_13008 | KHAU MO                | Son La    | TRAD | UP | I | I6 |
| G183 | VNPRC_13076 | KHAU PE LANH           | Son La    | TRAD | UP | I | Im |
| G186 | VNPRC_13309 | KHAU NO                | Son La    | TRAD | UP | I | Im |
| G187 | VNPRC_13320 | KHAU DUONG PHUONG      | Son La    | TRAD | UP | J | J1 |
| G189 | VNPRC_13362 | KHAU NAM RINH          | Dien Bien | TRAD | UP | I | I3 |
| G19  | VNPRC_509   | ON                     | na        | TRAD | na | I | Im |
| G190 | VNPRC_13363 | PLE PHMA CHUA          | Dien Bien | TRAD | UP | I | Im |
| G191 | VNPRC_13422 | KHAU TAN               | Dien Bien | TRAD | RL | J | J2 |
| G192 | VNPRC_13423 | KHAU BAO THAI          | Dien Bien | TRAD | RL | I | Im |
| G193 | VNPRC_13424 | BLE PE XA              | Dien Bien | TRAD | UP | J | J1 |
| G194 | VNPRC_13425 | BLE BLAU LIA           | Dien Bien | TRAD | UP | J | J1 |
| G195 | VNPRC_13426 | BLE BDE                | Dien Bien | TRAD | UP | J | J1 |
| G196 | VNPRC_13427 | BLE CO PON             | Dien Bien | TRAD | UP | m | m  |
| G2   | VNPRC_58    | TA CO LAO CAI          | Lao Cai   | TRAD | na | I | Im |
| G20  | VNPRC_553   | TE LE HOA BINH         | HoaBinh   | TRAD | na | I | I4 |
| G200 | VNPRC_13431 | CHA FU NU              | Lai Chau  | TRAD | UP | J | J1 |
| G201 | VNPRC_13435 | CHA XU PHU LU          | Lai Chau  | TRAD | UP | I | Im |
| G202 | VNPRC_13442 | NONG TO                | Lai Chau  | TRAD | UP | J | J1 |
| G203 | VNPRC_14212 | PLAU CA BANH           | Dien Bien | TRAD | UP | J | J1 |
| G204 | VNPRC_14215 | PLE DO                 | Dien Bien | TRAD | UP | J | J1 |
| G205 | VNPRC_14251 | BLE BLAU CHO           | SON LA    | TRAD | UP | I | I3 |
| G206 | VNPRC_14252 | BLE BLAU DO            | Son La    | TRAD | UP | J | J1 |
| G207 | VNPRC_14278 | KHAU LUA               | Son La    | TRAD | RL | m | m  |
| G208 | VNPRC_14279 | KHAU BOONG LAM         | Son La    | TRAD | RL | I | Im |
| G209 | VNPRC_14386 | BLE CHO                | Lai Chau  | TRAD | UP | I | I6 |

|      |             |                         |           |      |    |   |    |
|------|-------------|-------------------------|-----------|------|----|---|----|
| G21  | VNPRC_614   | GIE TRANG HOA BINH      | HoaBinh   | TRAD | na | I | I4 |
| G210 | VNPRC_14408 | KHAU LECH               | Lao Cai   | TRAD | UP | J | J1 |
| G211 | VNPRC_14587 | PLAU NGOANG PLAC        | Lao Cai   | TRAD | UP | I | Im |
| G212 | VNPRC_14589 | PLAU BULAT              | Lao Cai   | TRAD | UP | J | J1 |
| G214 | VNPRC_14596 | BLE BLAU DO             | Lao Cai   | TRAD | RL | J | Jm |
| G216 | VNPRC_14607 | TOM BEO BUA             | Lao Cai   | TRAD | RL | J | J1 |
| G217 | VNPRC_14615 | BLE BLAU SOA            | Lao Cai   | TRAD | RL | J | J1 |
| G219 | VNPRC_14792 | KHAU LA LANH            | Son La    | TRAD | RL | I | Im |
| G22  | VNPRC_760   | TRUNG TRANG TUYEN QUANG | na        | TRAD | na | I | I4 |
| G220 | VNPRC_T5300 | PLE LA                  | na        | TRAD | UP | J | J1 |
| G221 | VNPRC_T5455 | KHAU MAC CO             | na        | TRAD | UP | J | J1 |
| G222 | VNPRC_T6404 | PLE MA MU               | na        | TRAD | UP | J | J1 |
| G223 | VNPRC_T6794 | BLE BLAU TAN            | na        | TRAD | UP | J | J1 |
| G24  | VNPRC_1048  | TAM XOAN HAI HAU        | Nam Dinh  | TRAD | na | m | m  |
| G25  | VNPRC_1058  | NEP VANG ONG LAC SON HB | HoaBinh   | TRAD | na | J | J2 |
| G26  | VNPRC_1325  | KHAU CAI NOI            | Tay Bac   | TRAD | na | J | J1 |
| G299 | VNPRC_4806  | BLAO SINH SAI           | HoaBinh   | TRAD | na | J | J1 |
| G3   | VNPRC_85    | AN TU VO DO             | na        | TRAD | na | I | I4 |
| G37  | VNPRC_1845  | NEP CAM                 | Ha Giang  | TRAD | RL | I | Im |
| G38  | VNPRC_1849  | NEP NUONG               | Ha Giang  | TRAD | UP | J | J1 |
| G39  | VNPRC_1851  | NEP CAM                 | Ha Giang  | TRAD | RL | I | Im |
| G4   | VNPRC_135   | NHONG DO HAI DUONG      | Hai Duong | TRAD | na | I | I4 |
| G402 | IRGC_12731  | NIPPONBARE              | na        | IMP  | IR | J | J  |
| G46  | VNPRC_2368  | NEP BA LAO              | Nam Dinh  | TRAD | MG | J | J4 |
| G47  | VNPRC_2369  | NEP ONG LAO             | Nam Dinh  | TRAD | MG | J | J4 |
| G48  | VNPRC_2371  | LUA NGOI                | Nam Dinh  | TRAD | MG | J | J4 |
| G49  | VNPRC_2395  | DT10                    | na        | IMP  | na | I | I1 |
| G5   | VNPRC_149   | NHONG TRANG HAI PHONG   | Hai Phong | TRAD | na | I | I4 |
| G50  | VNPRC_3323  | LUA NEP BA THANG DANG 1 | Quang Nam | TRAD | UP | J | J2 |
| G51  | VNPRC_3332  | BA TRANG HUONG          | Quang Nam | TRAD | UP | I | I5 |
| G52  | VNPRC_3334  | BA TRANG HUONG          | Quang Nam | TRAD | UP | I | I5 |
| G53  | VNPRC_3351  | LUA CAN DO              | na        | TRAD | na | I | I6 |
| G54  | VNPRC_3360  | LUA LOC DO              | Quang Nam | TRAD | RL | I | I6 |
| G56  | VNPRC_3363  | LUA MAN                 | Quang Nam | TRAD | RL | I | I5 |
| G57  | VNPRC_3364  | NEP GHIM HUONG          | Quang Nam | TRAD | RL | I | Im |
| G58  | VNPRC_3368  | NEP HUONG LANG          | Quang Nam | TRAD | MG | I | I6 |
| G6   | VNPRC_170   | SOM GIAI HUNG YEN       | na        | TRAD | na | I | I4 |
| G61  | VNPRC_3402  | NEP RAN                 | QuangBinh | TRAD | na | J | J2 |
| G62  | VNPRC_3426  | QUANG TRANG             | Quang Tri | TRAD | IR | I | I5 |
| G63  | VNPRC_3429  | CHIEM DO                | Quang Tri | TRAD | na | I | I4 |
| G64  | VNPRC_3433  | VEN DO                  | Quang Tri | TRAD | IR | I | I5 |
| G65  | VNPRC_3443  | NUOC MAN DANG 1         | Quang Tri | TRAD | RL | I | I5 |
| G67  | VNPRC_3485  | LUA TRI DO DANG 2       | BinhDinh  | TRAD | RL | I | Im |
| G68  | VNPRC_3487  | NEP 3 THANG             | BinhDinh  | TRAD | IR | m | m  |

|     |            |                        |               |      |    |   |    |
|-----|------------|------------------------|---------------|------|----|---|----|
| G69 | VNPRC_3488 | COC MOI DANG 1         | BinhDinh      | TRAD | RL | I | I6 |
| G7  | VNPRC_172  | TE TRANG HOA BINH      | HoaBinh       | TRAD | na | I | I4 |
| G70 | VNPRC_3489 | COC MOI DANG 2         | BinhDinh      | TRAD | RL | I | Im |
| G72 | VNPRC_3494 | LUA CANG DANG 1        | BinhDinh      | TRAD | RL | I | Im |
| G73 | VNPRC_3495 | LUA CANG DANG 1        | BinhDinh      | TRAD | RL | I | I6 |
| G74 | VNPRC_3497 | NEP QUA CO RAU DANG 2  | BinhDinh      | TRAD | RL | I | I6 |
| G77 | VNPRC_3506 | CANG KIEN DANG 1       | BinhDinh      | TRAD | RL | I | I6 |
| G78 | VNPRC_3507 | CANG KIEN DANG 2       | BinhDinh      | TRAD | RL | I | I6 |
| G79 | VNPRC_3508 | LUA DA DANG 2          | BinhDinh      | TRAD | RL | I | I6 |
| G8  | VNPRC_175  | CHON TU 502 HOC VIEN   | na            | TRAD | na | I | I4 |
| G80 | VNPRC_3517 | BA KTONG               | Quang Ngai    | TRAD | UP | J | J3 |
| G81 | VNPRC_3519 | BA DO DANG 1           | Quang Ngai    | TRAD | UP | m | m  |
| G83 | VNPRC_3522 | NEP VANG               | Quang Ngai    | TRAD | UP | J | Jm |
| G84 | VNPRC_3525 | BA CHO KTE             | BinhDinh      | TRAD | na | J | J3 |
| G85 | VNPRC_3550 | CHANH CHUI             | ThanhHoa      | TRAD | MG | J | J4 |
| G86 | VNPRC_3588 | TAN NGAN               | Yen Bai       | TRAD | na | J | J2 |
| G87 | VNPRC_3886 | KHAU PAN PUA           | na            | TRAD | na | J | J1 |
| G88 | VNPRC_3895 | BLE MA MUA             | na            | TRAD | na | J | J1 |
| G89 | VNPRC_3947 | KHAU BO KHA            | na            | TRAD | na | J | J1 |
| G9  | VNPRC_200  | LOC TRANG SOM PLAY CAU | na            | TRAD | na | I | I4 |
| G90 | VNPRC_4812 | BLAO CLIA              | HoaBinh       | TRAD | UP | J | J1 |
| G91 | VNPRC_4815 | BLAO CO KEN            | HoaBinh       | TRAD | UP | J | J1 |
| G92 | VNPRC_4820 | BLAO CO CAM            | HoaBinh       | TRAD | UP | J | J1 |
| G93 | VNPRC_5034 | PO LE PO LAU XA        | Nghe An       | TRAD | UP | I | I5 |
| G94 | VNPRC_5111 | LUA DO                 | ThuaThien Hue | TRAD | UP | I | I5 |
| G95 | VNPRC_5127 | LUA CHAM               | Nam Dinh      | TRAD | RL | I | I4 |
| G96 | VNPRC_6191 | CHIEM RONG             | Nam Dinh      | TRAD | IR | I | Im |
| G98 | VNPRC_6203 | NGOI TIA               | Nam Dinh      | TRAD | RL | J | J4 |
| G99 | VNPRC_6234 | LUA CHAM BIEN          | NinhBinh      | TRAD | RL | I | I4 |

TRAD: traditional; IMP: improved; na: no data available; IR: irrigated; MG: mangrove; RL: rainfed lowland; UP: upland; I: indica; J: japonica; Sub-pop: sub-populations.
