# Supplementary material
Source: PubMed Central journal article supplement (PMC7688854)
Supplement: 12298_2020_902_MOESM3_ESM.pdf [file 12298_2020_902_MOESM3_ESM.pdf]

**Table 2. List of rice accessions possess *OsPsTOL1***

| Rice accessions |      |      |      |      |      | Sum      | Ratio  |
|-----------------|------|------|------|------|------|----------|--------|
| G2              | G6   | G9   | G12  | G14  | G19  | 60G/157G | 38.22% |
| G20             | G22  | G38  | G39  | G49  | G51  |          |        |
| G52             | G53  | G54  | G56  | G58  | G61  |          |        |
| G63             | G64  | G67  | G69  | G72  | G73  |          |        |
| G77             | G79  | G83  | G93  | G96  | G100 |          |        |
| G102            | G104 | G105 | G109 | G110 | G111 |          |        |
| G113            | G126 | G128 | G129 | G130 | G134 |          |        |
| G140            | G143 | G150 | G155 | G156 | G158 |          |        |
| G161            | G167 | G169 | G172 | G189 | G192 |          |        |
| G200            | G202 | G203 | G205 | G210 | G211 |          |        |
