# Supplementary material
Source: PubMed Central journal article supplement (PMC7688854)
Supplement: 12298_2020_902_MOESM4_ESM.pdf [file 12298_2020_902_MOESM4_ESM.pdf]

**Table 3. List of significant markers, QTLs and candidate genes found in this study**

| No               | QTL name         | Chr       | Trait                                                                   | Marker         | Position | Start -25 kb     | End + 25 kb  | <i>p</i>  | $-\log(p)$                                          | MSU ID           | RAP Locus ID | Orthologous in Arabidopsis | Gene description ( <a href="http://rice.plantbiology.msu.edu">http://rice.plantbiology.msu.edu</a> ) | PlantTFDB family |
|------------------|------------------|-----------|-------------------------------------------------------------------------|----------------|----------|------------------|--------------|-----------|-----------------------------------------------------|------------------|--------------|----------------------------|------------------------------------------------------------------------------------------------------|------------------|
| 1                | <i>qREP1.1</i>   | 1         | REP                                                                     | Sj01_11858181R | 11858181 | 11833181         | 11883181     | 1.63E-04  | 3.789                                               | LOC_Os01g21240.1 | Os01g0314700 | AT3G46730                  | MLA6 protein, putative, expressed                                                                    |                  |
|                  |                  |           |                                                                         |                |          |                  |              |           |                                                     | LOC_Os01g21250.1 | Os01g0314800 | AT4G02380                  | late embryogenesis abundant protein, putative, expressed                                             |                  |
| 2                | <i>qRPPUE1.2</i> | 1         | RPPUE                                                                   | Dj01_24709143F | 24709143 | 24684143         | 24734143     | 2.172E-07 | 6.663                                               | LOC_Os01g43220.1 | Os01g0619800 | AT4G01040                  | chitinase domain-containing protein 1 precursor, putative, expressed                                 |                  |
|                  |                  |           |                                                                         | Dj01_24709146R | 24709146 | 24684146         | 24734146     | 2.172E-07 | 6.663                                               | LOC_Os01g43250.1 | Os01g0620100 | AT1G64350                  | WD domain, G-beta repeat domain containing protein, expressed                                        |                  |
|                  |                  |           |                                                                         |                |          |                  |              |           |                                                     | LOC_Os01g43270.1 |              | AT1G01420                  | hydroquinone glucosyltransferase, putative, expressed                                                |                  |
| 3                | <i>qRPPUE1.3</i> | 1         | RPPUE                                                                   | Sj01_25844707R | 25844707 | 25819707         | 25869707     | 1.908E-05 | 4.719                                               | LOC_Os01g45510.1 | Os01g0642600 | AT5G23100                  | DUF617 domain containing protein, expressed                                                          |                  |
|                  |                  |           |                                                                         | Sj01_25852184F | 25852184 | 25827184         | 25877184     | 1.908E-05 | 4.719                                               | LOC_Os01g45520.1 | Os01g0642700 | AT2G19130                  | D-mannose binding lectin family protein, expressed                                                   |                  |
|                  |                  |           |                                                                         |                |          |                  |              |           |                                                     | Os01g0642801     |              |                            |                                                                                                      |                  |
|                  |                  |           |                                                                         |                |          |                  |              |           |                                                     | LOC_Os01g45530.1 | Os01g0642900 | AT3G18580                  | single-stranded DNA-binding protein, putative, expressed                                             |                  |
|                  |                  |           |                                                                         |                |          | LOC_Os01g45550.1 | Os01g0643300 | AT2G01420 | auxin efflux carrier component, putative, expressed | OsPIN3t          |              |                            |                                                                                                      |                  |
| 4                | <i>qRRSR1.4</i>  | 1         | RRSR                                                                    | Sj01_33199299R | 33199299 | 33174299         | 33224299     | 1.20E-05  | 4.921                                               | LOC_Os01g57390.1 | Os01g0782901 |                            | lysM domain containing protein, putative, expressed                                                  |                  |
|                  |                  |           |                                                                         |                |          |                  |              |           |                                                     | LOC_Os01g57400.1 | Os01g0783000 |                            | lysM domain containing protein, putative                                                             |                  |
|                  |                  |           |                                                                         |                |          |                  |              |           |                                                     | LOC_Os01g57410.3 | Os01g0783100 | AT1G09900                  | pentatricopeptide repeat domain containing protein, putative, expressed                              |                  |
|                  |                  |           |                                                                         |                |          |                  |              |           |                                                     | LOC_Os01g57420.1 | Os01g0783200 | AT2G20900                  | diacylglycerol kinase, putative, expressed                                                           |                  |
|                  |                  |           |                                                                         |                |          |                  |              |           |                                                     | LOC_Os01g57440.1 | Os01g0783400 | AT1G27410                  | DNA repair metallo-beta-lactamase, putative, expressed                                               |                  |
|                  |                  |           |                                                                         |                |          |                  |              |           |                                                     | LOC_Os01g57450.1 | Os01g0783500 | AT1G11360                  | universal stress protein domain containing protein, putative, expressed                              |                  |
|                  |                  |           |                                                                         |                |          |                  |              |           |                                                     | LOC_Os01g57460.1 | Os01g0783600 | AT4G03240                  | frataxin, putative, expressed                                                                        |                  |
|                  |                  |           |                                                                         |                |          |                  |              |           |                                                     | LOC_Os01g57470.1 | Os01g0783700 | AT5G54490                  | EF hand family protein, putative, expressed                                                          |                  |
| LOC_Os01g57480.1 | Os01g0783800     | AT4G27290 | serine/threonine-protein kinase receptor precursor, putative, expressed |                |          |                  |              |           |                                                     |                  |              |                            |                                                                                                      |                  |

|   |                  |   |       |                |          |          |          |          |       |                  |              |           |                                                                           |      |
|---|------------------|---|-------|----------------|----------|----------|----------|----------|-------|------------------|--------------|-----------|---------------------------------------------------------------------------|------|
|   |                  |   |       |                |          |          |          |          |       | LOC_Os01g57490.1 | Os01g0783900 | AT4G21390 | D-mannose binding lectin family protein, expressed                        |      |
| 5 | <i>qRPUpE1.5</i> | 1 | RPupE | Dj01_38369792F | 38369792 | 38344792 | 38394792 | 1.71E-07 | 6.768 | LOC_Os01g66070.1 | Os01g0883400 | AT1G77250 | PHD-finger domain containing protein, putative                            |      |
|   |                  |   |       | Dj01_38369795R | 38369795 | 38344795 | 38394795 | 1.71E-07 | 6.768 | LOC_Os01g66100.1 | Os01g0883800 | AT4G25420 | gibberellin 20 oxidase 2, putative, expressed                             |      |
|   |                  |   |       |                |          |          |          |          |       | LOC_Os01g66110.1 | Os01g0883900 | AT5G64030 | methyltransferase, putative, expressed                                    |      |
| 6 | <i>qRPUpE1.6</i> | 1 | RPupE | Sj01_42818140R | 42818140 | 42793140 | 42843140 | 2.75E-04 | 3.560 | LOC_Os01g73880.1 | Os01g0970400 | AT4G18040 | eukaryotic translation initiation factor, putative, expressed             |      |
|   |                  |   |       |                |          |          |          |          |       | LOC_Os01g73890.1 | Os01g0970500 | AT4G24440 | transcription initiation factor IIA gamma chain, putative, expressed      |      |
|   |                  |   |       |                |          |          |          |          |       | LOC_Os01g73900.1 | Os01g0970600 |           | DEAD-box ATP-dependent RNA helicase, putative, expressed                  |      |
|   |                  |   |       |                |          |          |          |          |       | LOC_Os01g73910.1 | Os01g0970700 | AT3G27110 | peptidase, putative, expressed                                            |      |
|   |                  |   |       |                |          |          |          |          |       | LOC_Os01g73950.1 | Os01g0970900 | AT3G48250 | PPR repeat containing protein, expressed                                  |      |
| 7 | <i>qRPUpE3.7</i> | 3 | RPupE | Dj03_33994297R | 33994297 | 33969297 | 34019297 | 2.47E-04 | 3.608 | LOC_Os03g59660.1 | Os03g0811300 | AT2G17380 | clathrin adaptor complex small chain domain containing protein, expressed |      |
|   |                  |   |       | Dj03_34003211F | 34003211 | 33978211 | 34028211 | 2.47E-04 | 3.608 | LOC_Os03g59670.1 | Os03g0811400 | AT2G41130 | basic helix-loop-helix, putative, expressed                               | bHLH |
|   |                  |   |       |                |          |          |          |          |       | LOC_Os03g59680.1 | Os03g0811500 | AT2G47350 | PAPA-1-like conserved region family protein, expressed                    |      |
|   |                  |   |       |                |          |          |          |          |       | LOC_Os03g59690.1 | Os03g0811550 | AT4G39610 | DUF617 domain containing protein, expressed                               |      |
|   |                  |   |       |                |          |          |          |          |       | LOC_Os03g59700.1 | Os03g0811600 | AT2G38730 | peptidyl-prolyl cis-trans isomerase, putative, expressed                  |      |
|   |                  |   |       |                |          |          |          |          |       | LOC_Os03g59710.1 | Os03g0811700 | AT5G12190 | RNA recognition motif containing protein, putative, expressed             |      |
|   |                  |   |       |                |          |          |          |          |       | LOC_Os03g59720.1 | Os03g0811800 | AT5G20180 | ribosomal protein L36 containing protein, expressed                       |      |
|   |                  |   |       |                |          |          |          |          |       | LOC_Os03g59730.1 | Os03g0811850 | AT3G04070 | No apical meristem protein, putative, expressed                           | NAC  |
|   |                  |   |       |                |          |          |          |          |       | LOC_Os03g59740.1 | Os03g0811900 | AT5G14670 | ADP-ribosylation factor, putative, expressed                              |      |
|   |                  |   |       | Dj03_34260933R | 34260933 | 34235933 | 34285933 | 3.29E-05 | 4.483 | LOC_Os03g60190.1 | Os03g0816500 | AT3G14160 | oxidoreductase, 2OG-Fe oxygenase family protein, putative, expressed      |      |
|   |                  |   |       | Sj03_34263611F | 34263611 | 34238611 | 34288611 | 3.29E-05 | 4.483 | LOC_Os03g60200.1 | Os03g0816600 | AT2G41080 | pentatricopeptide, putative, expressed                                    |      |
|   |                  |   |       |                |          |          |          |          |       | LOC_Os03g60210.1 | Os03g0816700 | AT5G01750 | DUF567 domain containing protein, putative, expressed                     |      |
|   |                  |   |       |                |          |          |          |          |       | LOC_Os03g60220.1 | Os03g0816800 | AT5G01750 | DUF567 domain containing protein, putative, expressed                     |      |

|    |                   |   |       |                |          |          |          |           |       |                  |                  |                  |                                                                               |                                                                |                                                                           |  |
|----|-------------------|---|-------|----------------|----------|----------|----------|-----------|-------|------------------|------------------|------------------|-------------------------------------------------------------------------------|----------------------------------------------------------------|---------------------------------------------------------------------------|--|
| 8  | <i>qRPUpE3.8</i>  | 3 | RPUpE |                |          |          |          |           |       | LOC_Os03g60240.1 | Os03g0816900     | AT2G38440        | SCAR-like protein 1, putative, expressed                                      |                                                                |                                                                           |  |
|    |                   |   |       |                |          |          |          |           |       |                  |                  |                  |                                                                               | Os03g0817000                                                   |                                                                           |  |
|    |                   |   |       |                |          |          |          |           |       |                  |                  | LOC_Os03g60250.1 | Os03g0817100                                                                  | AT2G38480                                                      | membrane associated DUF588 domain containing protein, putative, expressed |  |
|    |                   |   |       |                |          |          |          |           |       |                  |                  | LOC_Os03g60260.1 | Os03g0817200                                                                  | AT3G11900                                                      | ANT1, putative, expressed                                                 |  |
|    |                   |   |       |                |          |          |          |           |       |                  |                  | LOC_Os03g60279.1 | Os03g0817400                                                                  | AT2G33590                                                      | cinnamoyl-CoA reductase family, putative, expressed                       |  |
| 9  | <i>qRPUpE4.9</i>  | 4 | RPUpE | Sj04_30000756F | 30000756 | 29975756 | 30025756 | 3.48E-06  | 5.458 | LOC_Os04g50216.1 | Os04g0592600     | AT4G17790        | SNARE associated Golgi protein, putative, expressed                           |                                                                |                                                                           |  |
|    |                   |   |       | Sj04_30001687R | 30001687 | 29976687 | 30026687 | 3.48E-06  | 5.458 | LOC_Os04g50660.1 | Os04g0592700     | AT5G16750        | WD domain, G-beta repeat domain containing protein, expressed                 |                                                                |                                                                           |  |
|    |                   |   |       |                |          |          |          |           |       | LOC_Os04g50680.1 | Os04g0593200     | AT3G02940        | MYB family transcription factor, putative, expressed                          | MYB                                                            |                                                                           |  |
|    |                   |   |       |                |          |          |          |           |       | LOC_Os04g50700.1 | Os04g0593400     |                  | pathogenesis-related Bet v I family protein, putative, expressed              |                                                                |                                                                           |  |
|    |                   |   |       |                |          |          |          |           |       | LOC_Os04g50710.1 | Os04g0593500     | AT1G24020        | pathogenesis-related Bet v I family protein, putative, expressed              |                                                                |                                                                           |  |
|    |                   |   |       |                |          |          |          |           |       | LOC_Os04g50720.1 | Os04g0593600     | AT1G32340        | ara54-like RING finger protein, putative, expressed                           |                                                                |                                                                           |  |
|    |                   |   |       |                |          |          |          |           |       | LOC_Os04g50730.1 | Os04g0593700     | AT1G32340        | RWD domain containing protein, expressed                                      |                                                                |                                                                           |  |
|    |                   |   |       |                |          |          |          |           |       | LOC_Os04g50740.1 | Os04g0593800     | AT1G32340        | ara54-like RING finger protein, putative, expressed                           |                                                                |                                                                           |  |
|    |                   |   |       |                |          |          |          |           |       | LOC_Os04g50760.1 | Os04g0594000     | AT1G32340        | ara54-like RING finger protein, putative, expressed                           |                                                                |                                                                           |  |
| 10 | <i>qRPPUE5.10</i> | 5 | RPPUE | Dj05_17594815F | 17594815 | 17569815 | 17619815 | 9.242E-05 | 4.034 | LOC_Os05g29740.1 | Os05g0360900     |                  | invertase/pectin methylesterase inhibitor family protein, putative, expressed |                                                                |                                                                           |  |
|    |                   |   |       | Sj05_17598635F | 17598635 | 17573635 | 17623635 | 9.242E-05 | 4.034 | LOC_Os05g29750.1 | Os05g0361000     |                  | cytochrome P450 71E1, putative, expressed                                     |                                                                |                                                                           |  |
|    |                   |   |       |                |          |          |          |           |       | LOC_Os05g29760.1 | Os05g0361200     | AT2G30390        | ferrochelatase-2, chloroplast precursor, putative, expressed                  |                                                                |                                                                           |  |
| 11 | <i>qRRSR5.11</i>  | 5 | RRSR  | Dj05_18415203R | 18415203 | 18390203 | 18440203 | 1.81E-04  | 3.741 | LOC_Os05g31610.1 | Os05g0380800     | AT3G50950        | Leucine Rich Repeat family protein, expressed                                 |                                                                |                                                                           |  |
|    |                   |   |       |                |          |          |          |           |       |                  | LOC_Os05g31620.1 | Os05g0380900     | AT1G24620                                                                     | OscML15 - Calmodulin-related calcium sensor protein, expressed |                                                                           |  |
|    |                   |   |       |                |          |          |          |           |       |                  | LOC_Os05g31670.1 | Os05g0381400     | AT1G04560                                                                     | AWPM-19-like membrane family protein, putative, expressed      |                                                                           |  |
| 12 | <i>qRPPUE5.12</i> | 5 | RPPUE | Dj05_20855111F | 20855111 | 20830111 | 20880111 | 1.685E-05 | 4.773 | LOC_Os05g35110.1 | Os05g0425700     | AT1G21410        | OsFBL22 - F-box domain and LRR containing protein, expressed                  |                                                                |                                                                           |  |
|    |                   |   |       |                |          |          |          |           |       |                  | LOC_Os05g35140.1 | Os05g0426000     | AT1G21460                                                                     | nodulin MtN3 family protein, putative, expressed               |                                                                           |  |

|    |            |   |       |                |          |          |          |           |       |                  |                  |              |                                                                     |                                                                               |  |
|----|------------|---|-------|----------------|----------|----------|----------|-----------|-------|------------------|------------------|--------------|---------------------------------------------------------------------|-------------------------------------------------------------------------------|--|
|    |            |   |       |                |          |          |          |           |       | LOC_Os05g35160.1 | Os05g0426100     | AT1G03050    | clathrin assembly protein, putative, expressed                      |                                                                               |  |
| 13 | qRPPUE7.13 | 7 | RPPUE | Dj07_20403776R | 20403776 | 20378776 | 20428776 | 5.826E-05 | 4.235 | LOC_Os07g34110.1 | Os07g0525100     | AT5G64700    | integral membrane protein DUF6 containing protein, expressed        |                                                                               |  |
|    |            |   |       |                |          |          |          |           |       |                  | LOC_Os07g34130.1 | Os07g0525400 | AT5G54780                                                           | TBC domain containing protein, expressed                                      |  |
|    |            |   |       |                |          |          |          |           |       |                  | LOC_Os07g34140.1 | Os07g0525500 | AT5G13930                                                           | chalcone synthase, putative, expressed                                        |  |
| 14 | qRPPUE7.14 | 7 | RPPUE | Dj07_25716591R | 25716591 | 25691591 | 25741591 | 0.0002934 | 3.533 | LOC_Os07g42910.1 | Os07g0621600     | AT1G22450    | cytochrome c oxidase subunit, putative, expressed                   |                                                                               |  |
|    |            |   |       |                |          |          |          |           |       |                  | LOC_Os07g42924.1 | Os07g0621800 | AT1G22440                                                           | dehydrogenase, putative, expressed                                            |  |
|    |            |   |       |                |          |          |          |           |       |                  | LOC_Os07g42940.1 | Os07g0622000 | AT4G33950                                                           | CAMK_CAMK_like.7 - CAMK includes calcium/calmodulin dependent protein         |  |
|    |            |   |       |                |          |          |          |           |       |                  | LOC_Os07g42950.1 | Os07g0622100 | AT5G10360                                                           | 40S ribosomal protein S6, putative, expressed                                 |  |
|    |            |   |       |                |          |          |          |           |       |                  | LOC_Os07g42960.1 | Os07g0622200 | AT1G22410                                                           | phospho-2-dehydro-3-deoxyheptonate aldolase, chloroplast precursor, putative, |  |
|    |            |   |       |                |          |          |          |           |       |                  | LOC_Os07g42970.1 |              | AT1G22380                                                           | UDP-glucuronosyl and UDP-glucosyl transferase domain containing protein,      |  |
| 15 | qRPUPE9.15 | 9 | RPUPE | Sj09_06995517R | 6995517  | 6970517  | 7020517  | 2.29E-05  | 4.640 | LOC_Os09g12270.1 | Os09g0293900     | AT3G12340    | peptidyl-prolyl cis-trans isomerase, FKBP-type, putative, expressed |                                                                               |  |
|    |            |   |       |                |          |          |          |           |       |                  | LOC_Os09g12290.1 | Os09g0294000 | AT4G19710                                                           | bifunctional aspartokinase/homoserine dehydrogenase, chloroplast precursor,   |  |
|    |            |   |       |                |          |          |          |           |       |                  | LOC_Os09g12300.1 |              | AT2G17220                                                           | serine/threonine-protein kinase NAK, putative, expressed                      |  |
|    |            |   |       |                |          |          |          |           |       |                  | LOC_Os09g12310.1 | Os09g0294300 | AT3G15355                                                           | ubiquitin-conjugating enzyme domain containing protein, expressed             |  |
| 16 | qRPUUE9.16 | 9 | RPUUE | Dj09_10399982F | 10399982 | 10374982 | 10424982 | 1.35E-05  | 4.868 | LOC_Os09g16980.1 | Os09g0339300     | AT1G21240    | OsWAK86 - OsWAK pseudogene, expressed                               |                                                                               |  |
|    |            |   |       | Dj09_10404314F | 10404314 | 10379314 | 10429314 | 9.96E-05  | 4.002 | LOC_Os09g17000.1 | Os09g0339800     | AT1G66970    | glycerophosphoryl diester phosphodiesterase family protein,         |                                                                               |  |
|    |            |   |       | Dj09_10404317R | 10404317 | 10379317 | 10429317 | 1.35E-05  | 4.868 | LOC_Os09g17010.1 |                  | AT3G53380    | lectin-like receptor kinase 1, putative, expressed                  |                                                                               |  |
|    |            |   |       | Dj09_10411340R | 10411340 | 10386340 | 10436340 | 1.88E-04  | 3.725 | LOC_Os09g17080   | Os09g0340800     |              | OsFBX318 - F-box domain containing protein, expressed               |                                                                               |  |
|    |            |   |       | Dj09_10426324R | 10426324 | 10401324 | 10451324 | 3.66E-05  | 4.436 |                  |                  |              |                                                                     |                                                                               |  |
|    |            |   |       | Dj09_10449018R | 10449018 | 10424018 | 10474018 | 7.20E-05  | 4.143 | LOC_Os09g17080   | Os09g0340800     |              | OsFBX318 - F-box domain containing protein, expressed               |                                                                               |  |
|    |            |   |       | Dj09_10457183F | 10457183 | 10432183 | 10482183 | 1.90E-04  | 3.721 | LOC_Os09g17080   | Os09g0340800     |              | OsFBX318 - F-box domain containing protein, expressed               |                                                                               |  |
|    |            |   |       |                |          |          |          |           |       |                  |                  |              |                                                                     |                                                                               |  |
|    |            |   |       |                | 21135126 | 21110126 | 21160126 | 1.32E-05  | 4.880 | LOC_Os10g39520.1 | Os10g0541000     | AT5G65970    | MLO domain containing protein, putative, expressed                  |                                                                               |  |

|    |                    |    |       |                |          |          |          |           |       |                  |                  |              |                                                 |                                                                 |         |
|----|--------------------|----|-------|----------------|----------|----------|----------|-----------|-------|------------------|------------------|--------------|-------------------------------------------------|-----------------------------------------------------------------|---------|
| 17 | <i>qREP10.17</i>   | 10 | REP   | Dj10_21135126R |          |          |          |           |       | LOC_Os10g39540.1 | Os10g0541200     | AT2G33700    | protein phosphatase 2C, putative, expressed     |                                                                 |         |
|    |                    |    |       |                |          |          |          |           |       |                  | LOC_Os10g39550.1 | Os10g0541500 | AT2G02060                                       | MYB family transcription factor, putative, expressed            | G2-like |
|    |                    |    |       |                |          |          |          |           |       |                  | LOC_Os10g39560.1 | Os10g0541600 | AT5G08260                                       | OsSCP47 - Putative Serine Carboxypeptidase homologue, expressed |         |
| 18 | <i>qRPPUE12.18</i> | 12 | RPPUE | Sj12_17416280R | 17416280 | 17391280 | 17441280 | 6.657E-05 | 4.177 | LOC_Os12g29330.1 | Os12g0477400     | AT3G04070    | no apical meristem protein, putative, expressed |                                                                 |         |
|    |                    |    |       |                |          |          |          |           |       |                  | LOC_Os12g29350.1 | Os12g0477700 | AT3G48770                                       | ATP binding protein, putative, expressed                        |         |
