# Supplementary material
Source: PubMed Central journal article supplement (PMC7688854)
Supplement: 12298_2020_902_MOESM5_ESM.pdf [file 12298_2020_902_MOESM5_ESM.pdf]

|  |          |      |      |                                                                                 |                                                                                                                                                                                                                                                                                                                                                                                                                                                                                                                   |       |                                                                                                                                                                                                                                                                                                                                                                                                                                                                                                                                                                                                                                                                                                                                                                                                                                                                                                                                                                                                         |       |
|--|----------|------|------|---------------------------------------------------------------------------------|-------------------------------------------------------------------------------------------------------------------------------------------------------------------------------------------------------------------------------------------------------------------------------------------------------------------------------------------------------------------------------------------------------------------------------------------------------------------------------------------------------------------|-------|---------------------------------------------------------------------------------------------------------------------------------------------------------------------------------------------------------------------------------------------------------------------------------------------------------------------------------------------------------------------------------------------------------------------------------------------------------------------------------------------------------------------------------------------------------------------------------------------------------------------------------------------------------------------------------------------------------------------------------------------------------------------------------------------------------------------------------------------------------------------------------------------------------------------------------------------------------------------------------------------------------|-------|
|  | OS-00239 | 1.57 | 2.92 | phosphorus (Dular; 1μM Pi; shoot) vs phosphorus (Pusa Basmati 1; 1μM Pi; shoot) | Shoot samples of 15-day-old Dular seedlings grown in a phosphate deficient nutrient solution (1μM Pi); the solution (pH 5.5) was exchanged every 24h. Other growth conditions: growth chamber, 16h light (250-300μmol photons m <sup>-2</sup> s <sup>-1</sup> ) at 30°C / 8h darkness at 28°C cycles, 70% relative humidity. The nutrient solution as described in (Yoshida et al., 1976, Laboratory Manual for Physiological Studies of Rice, Ed 3, International Rice Research Institute, Manila, Philippines). | Dular | Traditional <i>Oryza sativa</i> ssp. indica variety with very low yield potential (7-22q/ha) and high tolerance to low phosphate (Pi) content in the soil. Dular is more efficient in Pi utilization and better preserves root growth under Pi-limiting conditions than a low Pi-sensitive variety, Pusa Basmati 1. When plants were grown under low Pi (1μM) for 15 days, Dular root length was 9.38 ± 0.17cm while Pusa Basmati 1 root length was 7.41 ± 0.15cm. Under low Pi, Dular produced more and longer lateral roots than Pusa Basmati 1. Even though under sufficient Pi root and shoot Pi content was lower in Dular than in Pusa Basmati 1, under low Pi root and shoot Pi content was higher in Dular than in Pusa Basmati 1 (Mehra et al., 2016, Front Plant Sci. 6: 1184). Dular belongs to wide-compatibility variety (WCV) rice germplasms, i.e. Dular is able to produce fertile hybrids when crossed to indica or japonica varieties (Wang et al., 1998, Theor Appl Genet. 97: 407). | shoot |
|--|----------|------|------|---------------------------------------------------------------------------------|-------------------------------------------------------------------------------------------------------------------------------------------------------------------------------------------------------------------------------------------------------------------------------------------------------------------------------------------------------------------------------------------------------------------------------------------------------------------------------------------------------------------|-------|---------------------------------------------------------------------------------------------------------------------------------------------------------------------------------------------------------------------------------------------------------------------------------------------------------------------------------------------------------------------------------------------------------------------------------------------------------------------------------------------------------------------------------------------------------------------------------------------------------------------------------------------------------------------------------------------------------------------------------------------------------------------------------------------------------------------------------------------------------------------------------------------------------------------------------------------------------------------------------------------------------|-------|

LOC\_Os01g45530.1

|          |      |      |                                                                                   |                                                                                                                                                                                                                                                                                                                                                                                                                                                                                                                        |            |                                                                                                                                                                                                                                                                                                                                                                                                                                                                                                                                                                                                                                                                                                                                                                                                                                                                                                                                                                                                                                                                                                                                                                                                                                                                                                                                                                                                                                                                                                                    |       |
|----------|------|------|-----------------------------------------------------------------------------------|------------------------------------------------------------------------------------------------------------------------------------------------------------------------------------------------------------------------------------------------------------------------------------------------------------------------------------------------------------------------------------------------------------------------------------------------------------------------------------------------------------------------|------------|--------------------------------------------------------------------------------------------------------------------------------------------------------------------------------------------------------------------------------------------------------------------------------------------------------------------------------------------------------------------------------------------------------------------------------------------------------------------------------------------------------------------------------------------------------------------------------------------------------------------------------------------------------------------------------------------------------------------------------------------------------------------------------------------------------------------------------------------------------------------------------------------------------------------------------------------------------------------------------------------------------------------------------------------------------------------------------------------------------------------------------------------------------------------------------------------------------------------------------------------------------------------------------------------------------------------------------------------------------------------------------------------------------------------------------------------------------------------------------------------------------------------|-------|
| OS-00036 | 1.21 | 2.24 | phosphorus (no P for 10d; shoot) vs untreated shoot samples (sufficient Fe and P) | Shoot samples of cultivar Nipponbare germinated for 2 days in distilled water and then floated for 10 days on the Yoshida nutrient solution (Yoshida et al., 1976, Laboratory Manual for Physiological Studies of Rice, Ed 3. International Rice Research Institute, Manila, The Philippines) with optimal iron (0.036mM FeCl3) concentration but lacking phosphorus (NaH2PO4). Other growth conditions: growth chamber, 12h light (450 mmol photons m <sup>-2</sup> s <sup>-1</sup> ) at 30°C / 12h darkness at 22°C. | Nipponbare | Japonica ( <i>Oryza sativa</i> ssp. japonica) variety resistant to infection by the plant <i>Striga hermonthica</i> , an obligate root hemiparasite (Swarbrick et al., 2008, <i>New Phytol.</i> 179: 515-529). Nipponbare is susceptible to <i>Xanthomonas oryzae</i> pv. <i>oryzae</i> strains BAI3 (from Burkina Faso), PXO99A (from the Philippines; race 6), PXO86 (from the Philippines; race 2), T7174 (from Japan; race 1), and MAI1 (from Mali). Nipponbare is well transformable with <i>Agrobacterium tumefaciens</i> : using <i>A. tumefaciens</i> strain EHA 105, transient transformation frequency has been found to be 85.2%, stable transformation frequency 53.52% (Tie et al., 2012, <i>Plant Mol. Biol.</i> 78: 1-18). Nipponbare is susceptible to <i>Meloidogyne graminicola</i> , a root knot nematode that induces re-differentiation of root cells into multinucleate giant cells and formation of hook-like galls. Nipponbare is susceptible to <i>Magnaporthe oryzae</i> isolate FR13 (virulent isolate from France) and resistant to <i>M. oryzae</i> isolates CL3.6.7 (avirulent isolate) and BR32 (nonadapted isolate from Brazil) (Abbruscato et al., 2012, <i>Mol Plant Pathol.</i> ; Faivre-Rampant et al., 2008, <i>New Phytol.</i> 180: 899-910). This variety is sensitive to drought stress; drought index 0.54 (Wei et al., 2017, <i>Front Plant Sci.</i> 8: 473). Nipponbare is susceptible to Rice Stripe Virus (RSV) (Zhao et al., 2016, <i>New Phytol.</i> 210: 196-207). | shoot |
|----------|------|------|-----------------------------------------------------------------------------------|------------------------------------------------------------------------------------------------------------------------------------------------------------------------------------------------------------------------------------------------------------------------------------------------------------------------------------------------------------------------------------------------------------------------------------------------------------------------------------------------------------------------|------------|--------------------------------------------------------------------------------------------------------------------------------------------------------------------------------------------------------------------------------------------------------------------------------------------------------------------------------------------------------------------------------------------------------------------------------------------------------------------------------------------------------------------------------------------------------------------------------------------------------------------------------------------------------------------------------------------------------------------------------------------------------------------------------------------------------------------------------------------------------------------------------------------------------------------------------------------------------------------------------------------------------------------------------------------------------------------------------------------------------------------------------------------------------------------------------------------------------------------------------------------------------------------------------------------------------------------------------------------------------------------------------------------------------------------------------------------------------------------------------------------------------------------|-------|

|          |      |      |                                                                          |                                                                                                                                                                                                                                                                                                                                                                                                                                                                                                                                                                                                                                                                                                                                         |             |                                                         |          |
|----------|------|------|--------------------------------------------------------------------------|-----------------------------------------------------------------------------------------------------------------------------------------------------------------------------------------------------------------------------------------------------------------------------------------------------------------------------------------------------------------------------------------------------------------------------------------------------------------------------------------------------------------------------------------------------------------------------------------------------------------------------------------------------------------------------------------------------------------------------------------|-------------|---------------------------------------------------------|----------|
| OS-00091 | 1.03 | 2.04 | phosphorus (low Pi for 6h) vs untreated seedling samples (sufficient Pi) | Seedling samples of cultivar Zhonghua 10 grown for 7 days in a nutrient solution with sufficient phosphate (0.323mM NaH <sub>2</sub> PO <sub>4</sub> ), then transferred to low phosphate (0.016mM NaH <sub>2</sub> PO <sub>4</sub> ) for 6h. Other components of the nutrient solution (pH 5.5): 1.425mM NH <sub>4</sub> NO <sub>3</sub> , 0.513mM K <sub>2</sub> SO <sub>4</sub> , 0.998mM CaCl <sub>2</sub> , 1.643mM MgSO <sub>4</sub> , 0.168mM Na <sub>2</sub> SiO <sub>3</sub> , 0.125mM Fe-EDTA, 0.019mM H <sub>3</sub> BO <sub>3</sub> , 0.009mM MnCl <sub>2</sub> , 0.155mM CuSO <sub>4</sub> , 0.152mM ZnSO <sub>4</sub> , 0.075mM Na <sub>2</sub> MoO <sub>4</sub> . Other conditions: 16h light at 30°C / 8h dark at 22°C. | Zhonghua 10 | Japonica ( <i>Oryza sativa</i> ssp. japonica) cultivar. | seedling |
|----------|------|------|--------------------------------------------------------------------------|-----------------------------------------------------------------------------------------------------------------------------------------------------------------------------------------------------------------------------------------------------------------------------------------------------------------------------------------------------------------------------------------------------------------------------------------------------------------------------------------------------------------------------------------------------------------------------------------------------------------------------------------------------------------------------------------------------------------------------------------|-------------|---------------------------------------------------------|----------|

|  |  |  |  |                                                                                   |                                                                                                                                                                                                                                                                                                                                                                                                                                                                                                                        |            |                                                                                                                                                                                                                                                                                                                                                                                                                                                                                                                                                                                                                                                                                                                                                                                                                                                                                                                                                                                                                                                                                                                                                                                                                                                                                                                                                                                                                                                                                                                    |       |
|--|--|--|--|-----------------------------------------------------------------------------------|------------------------------------------------------------------------------------------------------------------------------------------------------------------------------------------------------------------------------------------------------------------------------------------------------------------------------------------------------------------------------------------------------------------------------------------------------------------------------------------------------------------------|------------|--------------------------------------------------------------------------------------------------------------------------------------------------------------------------------------------------------------------------------------------------------------------------------------------------------------------------------------------------------------------------------------------------------------------------------------------------------------------------------------------------------------------------------------------------------------------------------------------------------------------------------------------------------------------------------------------------------------------------------------------------------------------------------------------------------------------------------------------------------------------------------------------------------------------------------------------------------------------------------------------------------------------------------------------------------------------------------------------------------------------------------------------------------------------------------------------------------------------------------------------------------------------------------------------------------------------------------------------------------------------------------------------------------------------------------------------------------------------------------------------------------------------|-------|
|  |  |  |  | phosphorus (no P for 10d; shoot) vs iron; phosphorus (no Fe and P for 10d; shoot) | Shoot samples of cultivar Nipponbare germinated for 2 days in distilled water and then floated for 10 days on the Yoshida nutrient solution (Yoshida et al., 1976, Laboratory Manual for Physiological Studies of Rice, Ed 3. International Rice Research Institute, Manila, The Philippines) with optimal iron (0.036mM FeCl3) concentration but lacking phosphorus (NaH2PO4). Other growth conditions: growth chamber, 12h light (450 mmol photons m <sup>-2</sup> s <sup>-1</sup> ) at 30°C / 12h darkness at 22°C. | Nipponbare | Japonica ( <i>Oryza sativa</i> ssp. japonica) variety resistant to infection by the plant <i>Striga hermonthica</i> , an obligate root hemiparasite (Swarbrick et al., 2008, <i>New Phytol.</i> 179: 515-529). Nipponbare is susceptible to <i>Xanthomonas oryzae</i> pv. <i>oryzae</i> strains BAI3 (from Burkina Faso), PXO99A (from the Philippines; race 6), PXO86 (from the Philippines; race 2), T7174 (from Japan; race 1), and MAI1 (from Mali). Nipponbare is well transformable with <i>Agrobacterium tumefaciens</i> : using <i>A. tumefaciens</i> strain EHA 105, transient transformation frequency has been found to be 85.2%, stable transformation frequency 53.52% (Tie et al., 2012, <i>Plant Mol. Biol.</i> 78: 1-18). Nipponbare is susceptible to <i>Meloidogyne graminicola</i> , a root knot nematode that induces re-differentiation of root cells into multinucleate giant cells and formation of hook-like galls. Nipponbare is susceptible to <i>Magnaporthe oryzae</i> isolate FR13 (virulent isolate from France) and resistant to <i>M. oryzae</i> isolates CL3.6.7 (avirulent isolate) and BR32 (nonadapted isolate from Brazil) (Abbruscato et al., 2012, <i>Mol Plant Pathol.</i> ; Faivre-Rampant et al., 2008, <i>New Phytol.</i> 180: 899-910). This variety is sensitive to drought stress; drought index 0.54 (Wei et al., 2017, <i>Front Plant Sci.</i> 8: 473). Nipponbare is susceptible to Rice Stripe Virus (RSV) (Zhao et al., 2016, <i>New Phytol.</i> 210: 196-207). | shoot |
|--|--|--|--|-----------------------------------------------------------------------------------|------------------------------------------------------------------------------------------------------------------------------------------------------------------------------------------------------------------------------------------------------------------------------------------------------------------------------------------------------------------------------------------------------------------------------------------------------------------------------------------------------------------------|------------|--------------------------------------------------------------------------------------------------------------------------------------------------------------------------------------------------------------------------------------------------------------------------------------------------------------------------------------------------------------------------------------------------------------------------------------------------------------------------------------------------------------------------------------------------------------------------------------------------------------------------------------------------------------------------------------------------------------------------------------------------------------------------------------------------------------------------------------------------------------------------------------------------------------------------------------------------------------------------------------------------------------------------------------------------------------------------------------------------------------------------------------------------------------------------------------------------------------------------------------------------------------------------------------------------------------------------------------------------------------------------------------------------------------------------------------------------------------------------------------------------------------------|-------|

OS-00036

qRPPUE1.3

|  |      |      |                                                                              |                                                                                                                                                                                                                                                                                                                                                                                                                                                                                                                                                                              |            |                                                                                                                                                                                                                                                                                                                                                                                                                                                                                                                                                                                                                                                                                                                                                                                                                                                                                                                                                                                                                                                                                                                                                                                                                                                                                                                                                                                                                                                                                                                    |       |
|--|------|------|------------------------------------------------------------------------------|------------------------------------------------------------------------------------------------------------------------------------------------------------------------------------------------------------------------------------------------------------------------------------------------------------------------------------------------------------------------------------------------------------------------------------------------------------------------------------------------------------------------------------------------------------------------------|------------|--------------------------------------------------------------------------------------------------------------------------------------------------------------------------------------------------------------------------------------------------------------------------------------------------------------------------------------------------------------------------------------------------------------------------------------------------------------------------------------------------------------------------------------------------------------------------------------------------------------------------------------------------------------------------------------------------------------------------------------------------------------------------------------------------------------------------------------------------------------------------------------------------------------------------------------------------------------------------------------------------------------------------------------------------------------------------------------------------------------------------------------------------------------------------------------------------------------------------------------------------------------------------------------------------------------------------------------------------------------------------------------------------------------------------------------------------------------------------------------------------------------------|-------|
|  | 1.09 | 2.13 | iron (no Fe for 10d; shoot) vs iron; phosphorus (no Fe and P for 10d; shoot) | Shoot samples of cultivar Nipponbare germinated for 2 days in distilled water and then floated for 10 days on the Yoshida nutrient solution (Yoshida et al., 1976, Laboratory Manual for Physiological Studies of Rice, Ed 3. International Rice Research Institute, Manila, The Philippines) with optimal phosphorus (0.323mM NaH <sub>2</sub> PO <sub>4</sub> ) concentration but lacking iron (FeCl <sub>3</sub> ) and citric acid. Other growth conditions: growth chamber, 12h light (450μmol photons m <sup>-2</sup> s <sup>-1</sup> ) at 30°C / 12h darkness at 22°C. | Nipponbare | Japonica ( <i>Oryza sativa</i> ssp. japonica) variety resistant to infection by the plant <i>Striga hermonthica</i> , an obligate root hemiparasite (Swarbrick et al., 2008, <i>New Phytol.</i> 179: 515-529). Nipponbare is susceptible to <i>Xanthomonas oryzae</i> pv. <i>oryzae</i> strains BAI3 (from Burkina Faso), PXO99A (from the Philippines; race 6), PXO86 (from the Philippines; race 2), T7174 (from Japan; race 1), and MAI1 (from Mali). Nipponbare is well transformable with <i>Agrobacterium tumefaciens</i> : using <i>A. tumefaciens</i> strain EHA 105, transient transformation frequency has been found to be 85.2%, stable transformation frequency 53.52% (Tie et al., 2012, <i>Plant Mol. Biol.</i> 78: 1-18). Nipponbare is susceptible to <i>Meloidogyne graminicola</i> , a root knot nematode that induces re-differentiation of root cells into multinucleate giant cells and formation of hook-like galls. Nipponbare is susceptible to <i>Magnaporthe oryzae</i> isolate FR13 (virulent isolate from France) and resistant to <i>M. oryzae</i> isolates CL3.6.7 (avirulent isolate) and BR32 (nonadapted isolate from Brazil) (Abbruscato et al., 2012, <i>Mol Plant Pathol.</i> ; Faivre-Rampant et al., 2008, <i>New Phytol.</i> 180: 899-910). This variety is sensitive to drought stress; drought index 0.54 (Wei et al., 2017, <i>Front Plant Sci.</i> 8: 473). Nipponbare is susceptible to Rice Stripe Virus (RSV) (Zhao et al., 2016, <i>New Phytol.</i> 210: 196-207). | shoot |
|--|------|------|------------------------------------------------------------------------------|------------------------------------------------------------------------------------------------------------------------------------------------------------------------------------------------------------------------------------------------------------------------------------------------------------------------------------------------------------------------------------------------------------------------------------------------------------------------------------------------------------------------------------------------------------------------------|------------|--------------------------------------------------------------------------------------------------------------------------------------------------------------------------------------------------------------------------------------------------------------------------------------------------------------------------------------------------------------------------------------------------------------------------------------------------------------------------------------------------------------------------------------------------------------------------------------------------------------------------------------------------------------------------------------------------------------------------------------------------------------------------------------------------------------------------------------------------------------------------------------------------------------------------------------------------------------------------------------------------------------------------------------------------------------------------------------------------------------------------------------------------------------------------------------------------------------------------------------------------------------------------------------------------------------------------------------------------------------------------------------------------------------------------------------------------------------------------------------------------------------------|-------|

LOC\_Os01g45550.1

|          |      |      |                                                                           |                                                                                                                                                                                                                                                                                                                                                                                                                                                                                                                                                                                                                                                                                                                                           |             |                                                         |          |
|----------|------|------|---------------------------------------------------------------------------|-------------------------------------------------------------------------------------------------------------------------------------------------------------------------------------------------------------------------------------------------------------------------------------------------------------------------------------------------------------------------------------------------------------------------------------------------------------------------------------------------------------------------------------------------------------------------------------------------------------------------------------------------------------------------------------------------------------------------------------------|-------------|---------------------------------------------------------|----------|
| OS-00091 | 1.01 | 2.02 | phosphorus (low Pi for 24h) vs untreated seedling samples (sufficient Pi) | Seedling samples of cultivar Zhonghua 10 grown for 7 days in a nutrient solution with sufficient phosphate (0.323mM NaH <sub>2</sub> PO <sub>4</sub> ), then transferred to low phosphate (0.016 mM NaH <sub>2</sub> PO <sub>4</sub> ) for 24h. Other components of the nutrient solution (pH 5.5): 1.425mM NH <sub>4</sub> NO <sub>3</sub> , 0.513mM K <sub>2</sub> SO <sub>4</sub> , 0.998mM CaCl <sub>2</sub> , 1.643mM MgSO <sub>4</sub> , 0.168mM Na <sub>2</sub> SiO <sub>3</sub> , 0.125mM Fe-EDTA, 0.019mM H <sub>3</sub> BO <sub>3</sub> , 0.009mM MnCl <sub>2</sub> , 0.155mM CuSO <sub>4</sub> , 0.152mM ZnSO <sub>4</sub> , 0.075mM Na <sub>2</sub> MoO <sub>4</sub> . Other conditions: 16h light at 30°C / 8h dark at 22°C. | Zhonghua 10 | Japonica ( <i>Oryza sativa</i> ssp. japonica) cultivar. | seedling |
|----------|------|------|---------------------------------------------------------------------------|-------------------------------------------------------------------------------------------------------------------------------------------------------------------------------------------------------------------------------------------------------------------------------------------------------------------------------------------------------------------------------------------------------------------------------------------------------------------------------------------------------------------------------------------------------------------------------------------------------------------------------------------------------------------------------------------------------------------------------------------|-------------|---------------------------------------------------------|----------|

|          |       |       |                                                                                                                           |                                                                                                                                                                                                                                                                                                                                                                                                                                                                                                                           |            |                                                                                                                                                                                                                                                                                                                                                                                                                                                                                                                                                                                                                                                                                                                                                                                                                                                                                                                                                                                                                                                                                                                                                                                                                                                                                                                                                                                                                                                                         |       |
|----------|-------|-------|---------------------------------------------------------------------------------------------------------------------------|---------------------------------------------------------------------------------------------------------------------------------------------------------------------------------------------------------------------------------------------------------------------------------------------------------------------------------------------------------------------------------------------------------------------------------------------------------------------------------------------------------------------------|------------|-------------------------------------------------------------------------------------------------------------------------------------------------------------------------------------------------------------------------------------------------------------------------------------------------------------------------------------------------------------------------------------------------------------------------------------------------------------------------------------------------------------------------------------------------------------------------------------------------------------------------------------------------------------------------------------------------------------------------------------------------------------------------------------------------------------------------------------------------------------------------------------------------------------------------------------------------------------------------------------------------------------------------------------------------------------------------------------------------------------------------------------------------------------------------------------------------------------------------------------------------------------------------------------------------------------------------------------------------------------------------------------------------------------------------------------------------------------------------|-------|
| OS-00036 | -1.39 | -2.61 | iron;<br>phosphorus<br>(no Fe and P<br>for 10d;<br>shoot) vs<br>untreated<br>shoot<br>samples<br>(sufficient<br>Fe and P) | Shoot samples of cultivar Nipponbare germinated for 2 days in distilled water and then floated for 10 days on the Yoshida nutrient solution (Yoshida et al., 1976, Laboratory Manual for Physiological Studies of Rice, Ed 3. International Rice Research Institute, Manila, The Philippines) lacking iron (FeCl <sub>3</sub> ) and phosphorus (NaH <sub>2</sub> PO <sub>4</sub> ). Other growth conditions: growth chamber, 12h light (450μmol photons m <sup>-2</sup> s <sup>-1</sup> ) at 30°C / 12h darkness at 22°C. | Nipponbare | Japonica ( <i>Oryza sativa</i> ssp. japonica) variety resistant to infection by the plant <i>Striga hermonthica</i> , an obligate root hemiparasite (Swarbrick et al., 2008, New Phytol. 179: 515-529). Nipponbare is susceptible to <i>Xanthomonas oryzae</i> pv. <i>oryzae</i> strains BAI3 (from Burkina Faso), PXO99A (from the Philippines; race 6), PXO86 (from the Philippines; race 2), T7174 (from Japan; race 1), and MAI1 (from Mali). Nipponbare is well transformable with <i>Agrobacterium tumefaciens</i> : using <i>A. tumefaciens</i> strain EHA 105, transient transformation frequency has been found to be 85.2%, stable transformation frequency 53.52% (Tie et al., 2012, Plant Mol. Biol. 78: 1-18). Nipponbare is susceptible to <i>Meloidogyne graminicola</i> , a root knot nematode that induces re-differentiation of root cells into multinucleate giant cells and formation of hook-like galls. Nipponbare is susceptible to <i>Magnaporthe oryzae</i> isolate FR13 (virulent isolate from France) and resistant to <i>M. oryzae</i> isolates CL3.6.7 (avirulent isolate) and BR32 (nonadapted isolate from Brazil) (Abbruscato et al., 2012, Mol Plant Pathol.; Faivre-Rampant et al., 2008, New Phytol. 180: 899-910). This variety is sensitive to drought stress; drought index 0.54 (Wei et al., 2017, Front Plant Sci. 8: 473). Nipponbare is susceptible to Rice Stripe Virus (RSV) (Zhao et al., 2016, New Phytol. 210: 196-207). | shoot |
|----------|-------|-------|---------------------------------------------------------------------------------------------------------------------------|---------------------------------------------------------------------------------------------------------------------------------------------------------------------------------------------------------------------------------------------------------------------------------------------------------------------------------------------------------------------------------------------------------------------------------------------------------------------------------------------------------------------------|------------|-------------------------------------------------------------------------------------------------------------------------------------------------------------------------------------------------------------------------------------------------------------------------------------------------------------------------------------------------------------------------------------------------------------------------------------------------------------------------------------------------------------------------------------------------------------------------------------------------------------------------------------------------------------------------------------------------------------------------------------------------------------------------------------------------------------------------------------------------------------------------------------------------------------------------------------------------------------------------------------------------------------------------------------------------------------------------------------------------------------------------------------------------------------------------------------------------------------------------------------------------------------------------------------------------------------------------------------------------------------------------------------------------------------------------------------------------------------------------|-------|



|          |       |       |                                                                                   |                                                                                                                                                                                                                                                                                                                                                                                                                                                                                                                     |       |                                                                                                                                                                                                                                                                                                                                                                                                                                                                                                                                                                                                                                                                                                                                                                                                                                                                                                                                                                                                         |       |
|----------|-------|-------|-----------------------------------------------------------------------------------|---------------------------------------------------------------------------------------------------------------------------------------------------------------------------------------------------------------------------------------------------------------------------------------------------------------------------------------------------------------------------------------------------------------------------------------------------------------------------------------------------------------------|-------|---------------------------------------------------------------------------------------------------------------------------------------------------------------------------------------------------------------------------------------------------------------------------------------------------------------------------------------------------------------------------------------------------------------------------------------------------------------------------------------------------------------------------------------------------------------------------------------------------------------------------------------------------------------------------------------------------------------------------------------------------------------------------------------------------------------------------------------------------------------------------------------------------------------------------------------------------------------------------------------------------------|-------|
|          |       |       | phosphorus (Dular; 320μM Pi; root) vs phosphorus (Pusa Basmati 1; 320μM Pi; root) | Root samples of 15-day-old Dular seedlings grown in a phosphate sufficient nutrient solution (320μM Pi); the solution (pH 5.5) was exchanged every 24h. Other growth conditions: growth chamber, 16h light (250-300μmol photons m <sup>-2</sup> s <sup>-1</sup> ) at 30°C / 8h darkness at 28°C cycles, 70% relative humidity. The nutrient solution as described in (Yoshida et al., 1976, Laboratory Manual for Physiological Studies of Rice, Ed 3, International Rice Research Institute, Manila, Philippines). | Dular | Traditional <i>Oryza sativa</i> ssp. indica variety with very low yield potential (7-22q/ha) and high tolerance to low phosphate (Pi) content in the soil. Dular is more efficient in Pi utilization and better preserves root growth under Pi-limiting conditions than a low Pi-sensitive variety, Pusa Basmati 1. When plants were grown under low Pi (1μM) for 15 days, Dular root length was 9.38 ± 0.17cm while Pusa Basmati 1 root length was 7.41 ± 0.15cm. Under low Pi, Dular produced more and longer lateral roots than Pusa Basmati 1. Even though under sufficient Pi root and shoot Pi content was lower in Dular than in Pusa Basmati 1, under low Pi root and shoot Pi content was higher in Dular than in Pusa Basmati 1 (Mehra et al., 2016, Front Plant Sci. 6: 1184). Dular belongs to wide-compatibility variety (WCV) rice germplasms, i.e. Dular is able to produce fertile hybrids when crossed to indica or japonica varieties (Wang et al., 1998, Theor Appl Genet. 97: 407). | shoot |
| OS-00239 | -1.9  | -3.88 |                                                                                   |                                                                                                                                                                                                                                                                                                                                                                                                                                                                                                                     |       |                                                                                                                                                                                                                                                                                                                                                                                                                                                                                                                                                                                                                                                                                                                                                                                                                                                                                                                                                                                                         |       |
|          |       |       | phosphorus (Dular; 1μM Pi; root) vs phosphorus (Pusa Basmati 1; 1μM Pi; root)     | Root samples of 15-day-old Dular seedlings grown in a phosphate deficient nutrient solution (1μM Pi); the solution (pH 5.5) was exchanged every 24h. Other growth conditions: growth chamber, 16h light (250-300μmol photons m <sup>-2</sup> s <sup>-1</sup> ) at 30°C / 8h darkness at 28°C cycles, 70% relative humidity. The nutrient solution as described in (Yoshida et al., 1976, Laboratory Manual for Physiological Studies of Rice, Ed 3, International Rice Research Institute, Manila, Philippines).    | Dular | Traditional <i>Oryza sativa</i> ssp. indica variety with very low yield potential (7-22q/ha) and high tolerance to low phosphate (Pi) content in the soil. Dular is more efficient in Pi utilization and better preserves root growth under Pi-limiting conditions than a low Pi-sensitive variety, Pusa Basmati 1. When plants were grown under low Pi (1μM) for 15 days, Dular root length was 9.38 ± 0.17cm while Pusa Basmati 1 root length was 7.41 ± 0.15cm. Under low Pi, Dular produced more and longer lateral roots than Pusa Basmati 1. Even though under sufficient Pi root and shoot Pi content was lower in Dular than in Pusa Basmati 1, under low Pi root and shoot Pi content was higher in Dular than in Pusa Basmati 1 (Mehra et al., 2016, Front Plant Sci. 6: 1184). Dular belongs to wide-compatibility variety (WCV) rice germplasms, i.e. Dular is able to produce fertile hybrids when crossed to indica or japonica varieties (Wang et al., 1998, Theor Appl Genet. 97: 407). | shoot |
|          | -2.45 | -5.51 |                                                                                   |                                                                                                                                                                                                                                                                                                                                                                                                                                                                                                                     |       |                                                                                                                                                                                                                                                                                                                                                                                                                                                                                                                                                                                                                                                                                                                                                                                                                                                                                                                                                                                                         |       |

|                  |          |       |       |                                                                                               |                                                                                                                                                                                                                                                              |                  |                                                                                                                                                                                                                                                                                                                                                                                                                                                                                                                                                                                                                                                                                                                                                                                                                                                                                                                                               |       |
|------------------|----------|-------|-------|-----------------------------------------------------------------------------------------------|--------------------------------------------------------------------------------------------------------------------------------------------------------------------------------------------------------------------------------------------------------------|------------------|-----------------------------------------------------------------------------------------------------------------------------------------------------------------------------------------------------------------------------------------------------------------------------------------------------------------------------------------------------------------------------------------------------------------------------------------------------------------------------------------------------------------------------------------------------------------------------------------------------------------------------------------------------------------------------------------------------------------------------------------------------------------------------------------------------------------------------------------------------------------------------------------------------------------------------------------------|-------|
| LOC_Os01g57390.1 | OS-00096 | -1.05 | -2.09 | phosphorus (IR64-null; no P fertilizer) vs phosphorus (IR64-null; 60kg/ha P2O5)               | Root samples of IR64-null line grown till the heading stage on phosphorus-deficient soil from Siniloan, Luzon, the Philippines (P-Bray, $1.23 \pm 0.30$ mgkg <sup>-1</sup> ; P-Olsen, $0.77 \pm 0.46$ mgkg <sup>-1</sup> ) under dry-down conditions.        | IR64-null        | Non-transgenic, phosphorus-starvation-intolerant line from the segregating progeny of a transformant heterozygous for the 35S::PSTOL1 transgene; sibling of the transgenic 35S::PSTOL1 (20) line.                                                                                                                                                                                                                                                                                                                                                                                                                                                                                                                                                                                                                                                                                                                                             | roots |
|                  |          | -1.47 | -3.23 | phosphorus (35S::PSTOL1 (20); no P fertilizer) vs phosphorus (35S::PSTOL1 (20); 60kg/ha P2O5) | Root samples of 35S::PSTOL1 (20) line grown till the heading stage on phosphorus-deficient soil from Siniloan, Luzon, the Philippines (P-Bray, $1.23 \pm 0.30$ mgkg <sup>-1</sup> ; P-Olsen, $0.77 \pm 0.46$ mgkg <sup>-1</sup> ) under dry-down conditions. | 35S::PSTOL1 (20) | Phosphorus-starvation-tolerant transgenic line 20 (cv. IR64 background) carrying full-length coding region (CDS) of PSTOL1 under control of the constitutive CaMV35S promoter and NOS terminator. The PSTOL1 CDS is derived from O. sativa indica cultivar Kasalath. PSTOL1 (Phosphorus-starvation tolerance 1; OsPupK46-2) encodes a functional serine/threonine protein kinase and is absent in genomes of phosphorus-starvation-intolerant rice varieties such as IR64, Nipponbare. 35S::PSTOL1 (20) plants grown on phosphorus-unfertilized soil have larger root system and produce approx. 60% more seeds than the control IR64-null plants (segregants without the transgene). Compared to the non-transgenic IR64-null control, total root length and surface area of 35S::PSTOL1 (20) plants is increased not only under low-phosphorus but also under phosphorus-sufficient conditions (Gamuyao et al., 2012, Nature 488: 535-539). | roots |
|                  |          | -1.12 | -2.74 | phosphorus (35S::PSTOL1 (20); no P fertilizer) vs phosphorus (35S::PSTOL1 (20); 60kg/ha P2O5) | Root samples of 35S::PSTOL1 (20) line grown till the heading stage on phosphorus-deficient soil from Siniloan, Luzon, the Philippines (P-Bray, $1.23 \pm 0.30$ mgkg <sup>-1</sup> ; P-Olsen, $0.77 \pm 0.46$ mgkg <sup>-1</sup> ) under dry-down conditions. | 35S::PSTOL1 (20) | Phosphorus-starvation-tolerant transgenic line 20 (cv. IR64 background) carrying full-length coding region (CDS) of PSTOL1 under control of the constitutive CaMV35S promoter and NOS terminator. The PSTOL1 CDS is derived from O. sativa indica cultivar Kasalath. PSTOL1 (Phosphorus-starvation tolerance 1; OsPupK46-2) encodes a functional serine/threonine protein kinase and is absent in genomes of phosphorus-starvation-intolerant rice varieties such as IR64, Nipponbare. 35S::PSTOL1 (20) plants grown on phosphorus-unfertilized soil have larger root system and produce approx. 60% more seeds than the control IR64-null plants (segregants without the transgene). Compared to the non-transgenic IR64-null control, total root length and surface area of 35S::PSTOL1 (20) plants is increased not only under low-phosphorus but also under phosphorus-sufficient conditions (Gamuyao et al., 2012, Nature 488: 535-539). | roots |
| LOC_Os01g57400.1 |          |       |       |                                                                                               |                                                                                                                                                                                                                                                              |                  |                                                                                                                                                                                                                                                                                                                                                                                                                                                                                                                                                                                                                                                                                                                                                                                                                                                                                                                                               |       |

|  |          |     |      |                                                                                                                           |                                                                                                                                                                                                                                                                                                                                                                                                                                                                                                                           |            |                                                                                                                                                                                                                                                                                                                                                                                                                                                                                                                                                                                                                                                                                                                                                                                                                                                                                                                                                                                                                                                                                                                                                                                                                                                                                                                                                                                                                                                                                                                    |       |
|--|----------|-----|------|---------------------------------------------------------------------------------------------------------------------------|---------------------------------------------------------------------------------------------------------------------------------------------------------------------------------------------------------------------------------------------------------------------------------------------------------------------------------------------------------------------------------------------------------------------------------------------------------------------------------------------------------------------------|------------|--------------------------------------------------------------------------------------------------------------------------------------------------------------------------------------------------------------------------------------------------------------------------------------------------------------------------------------------------------------------------------------------------------------------------------------------------------------------------------------------------------------------------------------------------------------------------------------------------------------------------------------------------------------------------------------------------------------------------------------------------------------------------------------------------------------------------------------------------------------------------------------------------------------------------------------------------------------------------------------------------------------------------------------------------------------------------------------------------------------------------------------------------------------------------------------------------------------------------------------------------------------------------------------------------------------------------------------------------------------------------------------------------------------------------------------------------------------------------------------------------------------------|-------|
|  | OS-00036 | 1.4 | 2.64 | iron;<br>phosphorus<br>(no Fe and P<br>for 10d;<br>shoot) vs<br>untreated<br>shoot<br>samples<br>(sufficient<br>Fe and P) | Shoot samples of cultivar Nipponbare germinated for 2 days in distilled water and then floated for 10 days on the Yoshida nutrient solution (Yoshida et al., 1976, Laboratory Manual for Physiological Studies of Rice, Ed 3. International Rice Research Institute, Manila, The Philippines) lacking iron (FeCl <sub>3</sub> ) and phosphorus (NaH <sub>2</sub> PO <sub>4</sub> ). Other growth conditions: growth chamber, 12h light (450μmol photons m <sup>-2</sup> s <sup>-1</sup> ) at 30°C / 12h darkness at 22°C. | Nipponbare | Japonica ( <i>Oryza sativa</i> ssp. japonica) variety resistant to infection by the plant <i>Striga hermonthica</i> , an obligate root hemiparasite (Swarbrick et al., 2008, <i>New Phytol.</i> 179: 515-529). Nipponbare is susceptible to <i>Xanthomonas oryzae</i> pv. <i>oryzae</i> strains BAI3 (from Burkina Faso), PXO99A (from the Philippines; race 6), PXO86 (from the Philippines; race 2), T7174 (from Japan; race 1), and MAI1 (from Mali). Nipponbare is well transformable with <i>Agrobacterium tumefaciens</i> : using <i>A. tumefaciens</i> strain EHA 105, transient transformation frequency has been found to be 85.2%, stable transformation frequency 53.52% (Tie et al., 2012, <i>Plant Mol. Biol.</i> 78: 1-18). Nipponbare is susceptible to <i>Meloidogyne graminicola</i> , a root knot nematode that induces re-differentiation of root cells into multinucleate giant cells and formation of hook-like galls. Nipponbare is susceptible to <i>Magnaporthe oryzae</i> isolate FR13 (virulent isolate from France) and resistant to <i>M. oryzae</i> isolates CL3.6.7 (avirulent isolate) and BR32 (nonadapted isolate from Brazil) (Abbruscato et al., 2012, <i>Mol Plant Pathol.</i> ; Faivre-Rampant et al., 2008, <i>New Phytol.</i> 180: 899-910). This variety is sensitive to drought stress; drought index 0.54 (Wei et al., 2017, <i>Front Plant Sci.</i> 8: 473). Nipponbare is susceptible to Rice Stripe Virus (RSV) (Zhao et al., 2016, <i>New Phytol.</i> 210: 196-207). | shoot |
|--|----------|-----|------|---------------------------------------------------------------------------------------------------------------------------|---------------------------------------------------------------------------------------------------------------------------------------------------------------------------------------------------------------------------------------------------------------------------------------------------------------------------------------------------------------------------------------------------------------------------------------------------------------------------------------------------------------------------|------------|--------------------------------------------------------------------------------------------------------------------------------------------------------------------------------------------------------------------------------------------------------------------------------------------------------------------------------------------------------------------------------------------------------------------------------------------------------------------------------------------------------------------------------------------------------------------------------------------------------------------------------------------------------------------------------------------------------------------------------------------------------------------------------------------------------------------------------------------------------------------------------------------------------------------------------------------------------------------------------------------------------------------------------------------------------------------------------------------------------------------------------------------------------------------------------------------------------------------------------------------------------------------------------------------------------------------------------------------------------------------------------------------------------------------------------------------------------------------------------------------------------------------|-------|

LOC\_Os01g57410.3

|          |       |       |                                                                        |                                                                                                                                                                                                                                                                                                                                                                                                                                                                                                                  |       |                                                                                                                                                                                                                                                                                                                                                                                                                                                                                                                                                                                                                                                                                                                                                                                                                                                                                                                                                                                                         |       |
|----------|-------|-------|------------------------------------------------------------------------|------------------------------------------------------------------------------------------------------------------------------------------------------------------------------------------------------------------------------------------------------------------------------------------------------------------------------------------------------------------------------------------------------------------------------------------------------------------------------------------------------------------|-------|---------------------------------------------------------------------------------------------------------------------------------------------------------------------------------------------------------------------------------------------------------------------------------------------------------------------------------------------------------------------------------------------------------------------------------------------------------------------------------------------------------------------------------------------------------------------------------------------------------------------------------------------------------------------------------------------------------------------------------------------------------------------------------------------------------------------------------------------------------------------------------------------------------------------------------------------------------------------------------------------------------|-------|
| OS-00239 | -1.04 | -2.05 | phosphorus (Dular; 1μM Pi; root) vs phosphorus (Dular; 320μM Pi; root) | Root samples of 15-day-old Dular seedlings grown in a phosphate deficient nutrient solution (1μM Pi); the solution (pH 5.5) was exchanged every 24h. Other growth conditions: growth chamber, 16h light (250-300μmol photons m <sup>-2</sup> s <sup>-1</sup> ) at 30°C / 8h darkness at 28°C cycles, 70% relative humidity. The nutrient solution as described in (Yoshida et al., 1976, Laboratory Manual for Physiological Studies of Rice, Ed 3, International Rice Research Institute, Manila, Philippines). | Dular | Traditional <i>Oryza sativa</i> ssp. indica variety with very low yield potential (7-22q/ha) and high tolerance to low phosphate (Pi) content in the soil. Dular is more efficient in Pi utilization and better preserves root growth under Pi-limiting conditions than a low Pi-sensitive variety, Pusa Basmati 1. When plants were grown under low Pi (1μM) for 15 days, Dular root length was 9.38 ± 0.17cm while Pusa Basmati 1 root length was 7.41 ± 0.15cm. Under low Pi, Dular produced more and longer lateral roots than Pusa Basmati 1. Even though under sufficient Pi root and shoot Pi content was lower in Dular than in Pusa Basmati 1, under low Pi root and shoot Pi content was higher in Dular than in Pusa Basmati 1 (Mehra et al., 2016, Front Plant Sci. 6: 1184). Dular belongs to wide-compatibility variety (WCV) rice germplasms, i.e. Dular is able to produce fertile hybrids when crossed to indica or japonica varieties (Wang et al., 1998, Theor Appl Genet. 97: 407). | roots |
|----------|-------|-------|------------------------------------------------------------------------|------------------------------------------------------------------------------------------------------------------------------------------------------------------------------------------------------------------------------------------------------------------------------------------------------------------------------------------------------------------------------------------------------------------------------------------------------------------------------------------------------------------|-------|---------------------------------------------------------------------------------------------------------------------------------------------------------------------------------------------------------------------------------------------------------------------------------------------------------------------------------------------------------------------------------------------------------------------------------------------------------------------------------------------------------------------------------------------------------------------------------------------------------------------------------------------------------------------------------------------------------------------------------------------------------------------------------------------------------------------------------------------------------------------------------------------------------------------------------------------------------------------------------------------------------|-------|

|          |       |       |                                                                                                                           |                                                                                                                                                                                                                                                                                                                                                                                                                                                                                                                                                                              |                  |                                                                                                                                                                                                                                                                                                                                                                                                                                                                                                                                                                                                                                                                                                                                                                                                                                                                                                                                                                                                                                                                                                                                                                                                                                                                                                                                                                                                                                                                                                                    |       |
|----------|-------|-------|---------------------------------------------------------------------------------------------------------------------------|------------------------------------------------------------------------------------------------------------------------------------------------------------------------------------------------------------------------------------------------------------------------------------------------------------------------------------------------------------------------------------------------------------------------------------------------------------------------------------------------------------------------------------------------------------------------------|------------------|--------------------------------------------------------------------------------------------------------------------------------------------------------------------------------------------------------------------------------------------------------------------------------------------------------------------------------------------------------------------------------------------------------------------------------------------------------------------------------------------------------------------------------------------------------------------------------------------------------------------------------------------------------------------------------------------------------------------------------------------------------------------------------------------------------------------------------------------------------------------------------------------------------------------------------------------------------------------------------------------------------------------------------------------------------------------------------------------------------------------------------------------------------------------------------------------------------------------------------------------------------------------------------------------------------------------------------------------------------------------------------------------------------------------------------------------------------------------------------------------------------------------|-------|
| OS-00036 | -1.51 | -2.88 | iron (no Fe for 10d; shoot) vs iron; phosphorus (no Fe and P for 10d; shoot)                                              | Shoot samples of cultivar Nipponbare germinated for 2 days in distilled water and then floated for 10 days on the Yoshida nutrient solution (Yoshida et al., 1976, Laboratory Manual for Physiological Studies of Rice, Ed 3. International Rice Research Institute, Manila, The Philippines) with optimal phosphorus (0.323mM NaH <sub>2</sub> PO <sub>4</sub> ) concentration but lacking iron (FeCl <sub>3</sub> ) and citric acid. Other growth conditions: growth chamber, 12h light (450μmol photons m <sup>-2</sup> s <sup>-1</sup> ) at 30°C / 12h darkness at 22°C. | Nipponbare       | Japonica ( <i>Oryza sativa</i> ssp. japonica) variety resistant to infection by the plant <i>Striga hermonthica</i> , an obligate root hemiparasite (Swarbrick et al., 2008, <i>New Phytol.</i> 179: 515-529). Nipponbare is susceptible to <i>Xanthomonas oryzae</i> pv. <i>oryzae</i> strains BAI3 (from Burkina Faso), PXO99A (from the Philippines; race 6), PXO86 (from the Philippines; race 2), T7174 (from Japan; race 1), and MAI1 (from Mali). Nipponbare is well transformable with <i>Agrobacterium tumefaciens</i> : using <i>A. tumefaciens</i> strain EHA 105, transient transformation frequency has been found to be 85.2%, stable transformation frequency 53.52% (Tie et al., 2012, <i>Plant Mol. Biol.</i> 78: 1-18). Nipponbare is susceptible to <i>Meloidogyne graminicola</i> , a root knot nematode that induces re-differentiation of root cells into multinucleate giant cells and formation of hook-like galls. Nipponbare is susceptible to <i>Magnaporthe oryzae</i> isolate FR13 (virulent isolate from France) and resistant to <i>M. oryzae</i> isolates CL3.6.7 (avirulent isolate) and BR32 (nonadapted isolate from Brazil) (Abbruscato et al., 2012, <i>Mol Plant Pathol.</i> ; Faivre-Rampant et al., 2008, <i>New Phytol.</i> 180: 899-910). This variety is sensitive to drought stress; drought index 0.54 (Wei et al., 2017, <i>Front Plant Sci.</i> 8: 473). Nipponbare is susceptible to Rice Stripe Virus (RSV) (Zhao et al., 2016, <i>New Phytol.</i> 210: 196-207). | shoot |
| OS-00096 | 2.76  | 6.8   | phosphorus (35S::PSTOL 1 (20); no P fertilizer) vs phosphorus (35S::PSTOL 1 (20); 60kg/ha P <sub>2</sub> O <sub>5</sub> ) | Root samples of 35S::PSTOL1 (20) line grown till the heading stage on phosphorus-deficient soil from Siniloan, Luzon, the Philippines (P-Bray, 1.23 ± 0.30mgkg <sup>-1</sup> ; P-Olsen, 0.77 ± 0.46 mgkg <sup>-1</sup> ) under dry-down conditions.                                                                                                                                                                                                                                                                                                                          | 35S::PSTOL1 (20) | Phosphorus-starvation-tolerant transgenic line 20 (cv. IR64 background) carrying full-length coding region (CDS) of PSTOL1 under control of the constitutive CaMV35S promoter and NOS terminator. The PSTOL1 CDS is derived from <i>O. sativa indica</i> cultivar Kasalath. PSTOL1 (Phosphorus-starvation tolerance 1; OsPupK46-2) encodes a functional serine/threonine protein kinase and is absent in genomes of phosphorus-starvation-intolerant rice varieties such as IR64, Nipponbare. 35S::PSTOL1 (20) plants grown on phosphorus-undefertilized soil have larger root system and produce approx. 60% more seeds than the control IR64-null plants (segregants without the transgene). Compared to the non-transgenic IR64-null control, total root length and surface area of 35S::PSTOL1 (20) plants is increased not only under low-phosphorus but also under phosphorus-sufficient conditions (Gamuyao et al., 2012, <i>Nature</i> 488: 535-539).                                                                                                                                                                                                                                                                                                                                                                                                                                                                                                                                                      | roots |

|          |      |      |                                                                                 |                                                                                                                                                                                                                                                                                                                                                                                                                                                                                                                                                                             |            |                                                                                                                                                                                                                                                                                                                                                                                                                                                                                                                                                                                                                                                                                                                                                                                                                                                                                                                                                                                                                                                                                                                                                                                                                                                                                                                                                                                                                                                                    |       |
|----------|------|------|---------------------------------------------------------------------------------|-----------------------------------------------------------------------------------------------------------------------------------------------------------------------------------------------------------------------------------------------------------------------------------------------------------------------------------------------------------------------------------------------------------------------------------------------------------------------------------------------------------------------------------------------------------------------------|------------|--------------------------------------------------------------------------------------------------------------------------------------------------------------------------------------------------------------------------------------------------------------------------------------------------------------------------------------------------------------------------------------------------------------------------------------------------------------------------------------------------------------------------------------------------------------------------------------------------------------------------------------------------------------------------------------------------------------------------------------------------------------------------------------------------------------------------------------------------------------------------------------------------------------------------------------------------------------------------------------------------------------------------------------------------------------------------------------------------------------------------------------------------------------------------------------------------------------------------------------------------------------------------------------------------------------------------------------------------------------------------------------------------------------------------------------------------------------------|-------|
|          | 2.42 | 5.36 | phosphorus (IR64-null; no P fertilizer) vs phosphorus (IR64-null; 60kg/ha P2O5) | Root samples of IR64-null line grown till the heading stage on phosphorus-deficient soil from Siniloan, Luzon, the Philippines (P-Bray, $1.23 \pm 0.30$ mgkg <sup>-1</sup> ; P-Olsen, $0.77 \pm 0.46$ mgkg <sup>-1</sup> ) under dry-down conditions.                                                                                                                                                                                                                                                                                                                       | IR64-null  | Non-transgenic, phosphorus-starvation-intolerant line from the segregating progeny of a transformant heterozygous for the 35S::PSTOL1 transgene; sibling of the transgenic 35S::PSTOL1 (20) line.                                                                                                                                                                                                                                                                                                                                                                                                                                                                                                                                                                                                                                                                                                                                                                                                                                                                                                                                                                                                                                                                                                                                                                                                                                                                  | roots |
| OS-00036 | 2.38 | 5.17 | iron (no Fe for 10d; root) vs untreated root samples (sufficient Fe and P)      | Root samples of cultivar Nipponbare germinated for 2 days in distilled water and then floated for 10 days on the Yoshida nutrient solution (Yoshida et al., 1976, Laboratory Manual for Physiological Studies of Rice, Ed 3. International Rice Research Institute, Manila, The Philippines) with optimal phosphorus (0.323mM NaH <sub>2</sub> PO <sub>4</sub> ) concentration but lacking iron (FeCl <sub>3</sub> ) and citric acid. Other growth conditions: growth chamber, 12h light (450μmol photons m <sup>-2</sup> s <sup>-1</sup> ) at 30°C / 12h darkness at 22°C. | Nipponbare | Japonica ( <i>Oryza sativa</i> ssp. japonica) variety resistant to infection by the plant <i>Striga hermonthica</i> , an obligate hemiparasite (Swarbrick et al., 2008, New Phytol. 179: 515-529). Nipponbare is susceptible to <i>Xanthomonas oryzae</i> pv. <i>oryzae</i> strains BAI3 (from Burkina Faso), PXO99A (from the Philippines; race 6), PXO86 (from the Philippines; race 2), T7174 (from Japan; race 1), and MAI1 (from Mali). Nipponbare is well transformable with <i>Agrobacterium tumefaciens</i> : using <i>A. tumefaciens</i> strain EHA 105, transient transformation frequency has been found to be 85.2%, stable transformation frequency 53.52% (Tie et al., 2012, Plant Mol. Biol. 78: 1-18). Nipponbare is susceptible to <i>Meloidogyne graminicola</i> , a root knot nematode that induces re-differentiation of root cells into multinucleate giant cells and formation of hook-like galls. Nipponbare is susceptible to <i>Magnaporthe oryzae</i> isolate FR13 (virulent isolate from France) and resistant to <i>M. oryzae</i> isolates CL3.6.7 (avirulent isolate) and BR32 (nonadapted isolate from Brazil) (Abbruscato et al., 2012, Mol Plant Pathol.; Faivre-Rampant et al., 2008, New Phytol. 180: 899-910). This variety is sensitive to drought stress; drought index 0.54 (Wei et al., 2017, Front Plant Sci. 8: 473). Nipponbare is susceptible to Rice Stripe Virus (RSV) (Zhao et al., 2016, New Phytol. 210: 196-207). | roots |

|  |      |      |                                                                              |                                                                                                                                                                                                                                                                                                                                                                                                                                                                                                                                                                              |            |                                                                                                                                                                                                                                                                                                                                                                                                                                                                                                                                                                                                                                                                                                                                                                                                                                                                                                                                                                                                                                                                                                                                                                                                                                                                                                                                                                                                                                                                                                                    |       |
|--|------|------|------------------------------------------------------------------------------|------------------------------------------------------------------------------------------------------------------------------------------------------------------------------------------------------------------------------------------------------------------------------------------------------------------------------------------------------------------------------------------------------------------------------------------------------------------------------------------------------------------------------------------------------------------------------|------------|--------------------------------------------------------------------------------------------------------------------------------------------------------------------------------------------------------------------------------------------------------------------------------------------------------------------------------------------------------------------------------------------------------------------------------------------------------------------------------------------------------------------------------------------------------------------------------------------------------------------------------------------------------------------------------------------------------------------------------------------------------------------------------------------------------------------------------------------------------------------------------------------------------------------------------------------------------------------------------------------------------------------------------------------------------------------------------------------------------------------------------------------------------------------------------------------------------------------------------------------------------------------------------------------------------------------------------------------------------------------------------------------------------------------------------------------------------------------------------------------------------------------|-------|
|  | 1.53 | 2.89 | iron (no Fe for 10d; shoot) vs iron; phosphorus (no Fe and P for 10d; shoot) | Shoot samples of cultivar Nipponbare germinated for 2 days in distilled water and then floated for 10 days on the Yoshida nutrient solution (Yoshida et al., 1976, Laboratory Manual for Physiological Studies of Rice, Ed 3. International Rice Research Institute, Manila, The Philippines) with optimal phosphorus (0.323mM NaH <sub>2</sub> PO <sub>4</sub> ) concentration but lacking iron (FeCl <sub>3</sub> ) and citric acid. Other growth conditions: growth chamber, 12h light (450μmol photons m <sup>-2</sup> s <sup>-1</sup> ) at 30°C / 12h darkness at 22°C. | Nipponbare | Japonica ( <i>Oryza sativa</i> ssp. japonica) variety resistant to infection by the plant <i>Striga hermonthica</i> , an obligate root hemiparasite (Swarbrick et al., 2008, <i>New Phytol.</i> 179: 515-529). Nipponbare is susceptible to <i>Xanthomonas oryzae</i> pv. <i>oryzae</i> strains BAI3 (from Burkina Faso), PXO99A (from the Philippines; race 6), PXO86 (from the Philippines; race 2), T7174 (from Japan; race 1), and MAI1 (from Mali). Nipponbare is well transformable with <i>Agrobacterium tumefaciens</i> : using <i>A. tumefaciens</i> strain EHA 105, transient transformation frequency has been found to be 85.2%, stable transformation frequency 53.52% (Tie et al., 2012, <i>Plant Mol. Biol.</i> 78: 1-18). Nipponbare is susceptible to <i>Meloidogyne graminicola</i> , a root knot nematode that induces re-differentiation of root cells into multinucleate giant cells and formation of hook-like galls. Nipponbare is susceptible to <i>Magnaporthe oryzae</i> isolate FR13 (virulent isolate from France) and resistant to <i>M. oryzae</i> isolates CL3.6.7 (avirulent isolate) and BR32 (nonadapted isolate from Brazil) (Abbruscato et al., 2012, <i>Mol Plant Pathol.</i> ; Faivre-Rampant et al., 2008, <i>New Phytol.</i> 180: 899-910). This variety is sensitive to drought stress; drought index 0.54 (Wei et al., 2017, <i>Front Plant Sci.</i> 8: 473). Nipponbare is susceptible to Rice Stripe Virus (RSV) (Zhao et al., 2016, <i>New Phytol.</i> 210: 196-207). | roots |
|--|------|------|------------------------------------------------------------------------------|------------------------------------------------------------------------------------------------------------------------------------------------------------------------------------------------------------------------------------------------------------------------------------------------------------------------------------------------------------------------------------------------------------------------------------------------------------------------------------------------------------------------------------------------------------------------------|------------|--------------------------------------------------------------------------------------------------------------------------------------------------------------------------------------------------------------------------------------------------------------------------------------------------------------------------------------------------------------------------------------------------------------------------------------------------------------------------------------------------------------------------------------------------------------------------------------------------------------------------------------------------------------------------------------------------------------------------------------------------------------------------------------------------------------------------------------------------------------------------------------------------------------------------------------------------------------------------------------------------------------------------------------------------------------------------------------------------------------------------------------------------------------------------------------------------------------------------------------------------------------------------------------------------------------------------------------------------------------------------------------------------------------------------------------------------------------------------------------------------------------------|-------|

|          |      |     |                                                                                          |                                                                                                                                                                                                                                                                                                                                                                                                                                                                                                                           |                |                                                                                                                                                                                                                                                                                                                                                                                                                                                                                   |       |
|----------|------|-----|------------------------------------------------------------------------------------------|---------------------------------------------------------------------------------------------------------------------------------------------------------------------------------------------------------------------------------------------------------------------------------------------------------------------------------------------------------------------------------------------------------------------------------------------------------------------------------------------------------------------------|----------------|-----------------------------------------------------------------------------------------------------------------------------------------------------------------------------------------------------------------------------------------------------------------------------------------------------------------------------------------------------------------------------------------------------------------------------------------------------------------------------------|-------|
| OS-00239 | 1.53 | 2.9 | phosphorus (Pusa Basmati 1; 1μM Pi; root) vs phosphorus (Pusa Basmati 1; 320μM Pi; root) | Root samples of 15-day-old Pusa Basmati 1 seedlings grown in a phosphate deficient nutrient solution (1μM Pi); the solution (pH 5.5) was exchanged every 24h. Other growth conditions: growth chamber, 16h light (250-300μmol photons m <sup>-2</sup> s <sup>-1</sup> ) at 30°C / 8h darkness at 28°C cycles, 70% relative humidity. The nutrient solution as described in (Yoshida et al., 1976, Laboratory Manual for Physiological Studies of Rice, Ed 3, International Rice Research Institute, Manila, Philippines). | Pusa Basmati 1 | Semi-dwarf aromatic (Evolved Basmati) cultivar developed by The Indian Agricultural Research Institute (IARI), released in 1989. Low number of seeds (approx. 181) per panicle (Deshmukh et al., 2010, Funct Integr Genomics 10: 339-47). Pusa Basmati 1 is susceptible to Magnaporthe oryzae strain Mo-nwi-53 (Jain et al., 2017, Front Plant Sci. 8: 93). Pusa Basmati 1 is sensitive to low phosphate (Pi) content in the soil (Mehra et al., 2016, Front Plant Sci. 6: 1184). | roots |
|----------|------|-----|------------------------------------------------------------------------------------------|---------------------------------------------------------------------------------------------------------------------------------------------------------------------------------------------------------------------------------------------------------------------------------------------------------------------------------------------------------------------------------------------------------------------------------------------------------------------------------------------------------------------------|----------------|-----------------------------------------------------------------------------------------------------------------------------------------------------------------------------------------------------------------------------------------------------------------------------------------------------------------------------------------------------------------------------------------------------------------------------------------------------------------------------------|-------|



LOC\_Os01g57420.1

|          |      |      |                                                                                 |                                                                                                                                                                                                                                                                                                                                                                                                                                                                                                                      |            |                                                                                                                                                                                                                                                                                                                                                                                                                                                                                                                                                                                                                                                                                                                                                                                                                                                                                                                                                                                                                                                                                                                                                                                                                                                                                                                                                                                                                                                                                                                    |       |
|----------|------|------|---------------------------------------------------------------------------------|----------------------------------------------------------------------------------------------------------------------------------------------------------------------------------------------------------------------------------------------------------------------------------------------------------------------------------------------------------------------------------------------------------------------------------------------------------------------------------------------------------------------|------------|--------------------------------------------------------------------------------------------------------------------------------------------------------------------------------------------------------------------------------------------------------------------------------------------------------------------------------------------------------------------------------------------------------------------------------------------------------------------------------------------------------------------------------------------------------------------------------------------------------------------------------------------------------------------------------------------------------------------------------------------------------------------------------------------------------------------------------------------------------------------------------------------------------------------------------------------------------------------------------------------------------------------------------------------------------------------------------------------------------------------------------------------------------------------------------------------------------------------------------------------------------------------------------------------------------------------------------------------------------------------------------------------------------------------------------------------------------------------------------------------------------------------|-------|
| OS-00036 | 1.42 | 2.65 | phosphorus (no P for 10d; root) vs untreated root samples (sufficient Fe and P) | Root samples of cultivar Nipponbare germinated for 2 days in distilled water and then floated for 10 days on the Yoshida nutrient solution (Yoshida et al., 1976, Laboratory Manual for Physiological Studies of Rice, Ed 3. International Rice Research Institute, Manila, The Philippines) with optimal iron (0.036mM FeCl3) concentration but lacking phosphorus (NaH2PO4). Other growth conditions: growth chamber, 12h light (450µmol photons m <sup>-2</sup> s <sup>-1</sup> ) at 30°C / 12h darkness at 22°C. | Nipponbare | Japonica ( <i>Oryza sativa</i> ssp. japonica) variety resistant to infection by the plant <i>Striga hermonthica</i> , an obligate root hemiparasite (Swarbrick et al., 2008, <i>New Phytol.</i> 179: 515-529). Nipponbare is susceptible to <i>Xanthomonas oryzae</i> pv. <i>oryzae</i> strains BAI3 (from Burkina Faso), PXO99A (from the Philippines; race 6), PXO86 (from the Philippines; race 2), T7174 (from Japan; race 1), and MAI1 (from Mali). Nipponbare is well transformable with <i>Agrobacterium tumefaciens</i> : using <i>A. tumefaciens</i> strain EHA 105, transient transformation frequency has been found to be 85.2%, stable transformation frequency 53.52% (Tie et al., 2012, <i>Plant Mol. Biol.</i> 78: 1-18). Nipponbare is susceptible to <i>Meloidogyne graminicola</i> , a root knot nematode that induces re-differentiation of root cells into multinucleate giant cells and formation of hook-like galls. Nipponbare is susceptible to <i>Magnaporthe oryzae</i> isolate FR13 (virulent isolate from France) and resistant to <i>M. oryzae</i> isolates CL3.6.7 (avirulent isolate) and BR32 (nonadapted isolate from Brazil) (Abbruscato et al., 2012, <i>Mol Plant Pathol.</i> ; Faivre-Rampant et al., 2008, <i>New Phytol.</i> 180: 899-910). This variety is sensitive to drought stress; drought index 0.54 (Wei et al., 2017, <i>Front Plant Sci.</i> 8: 473). Nipponbare is susceptible to Rice Stripe Virus (RSV) (Zhao et al., 2016, <i>New Phytol.</i> 210: 196-207). | roots |
|----------|------|------|---------------------------------------------------------------------------------|----------------------------------------------------------------------------------------------------------------------------------------------------------------------------------------------------------------------------------------------------------------------------------------------------------------------------------------------------------------------------------------------------------------------------------------------------------------------------------------------------------------------|------------|--------------------------------------------------------------------------------------------------------------------------------------------------------------------------------------------------------------------------------------------------------------------------------------------------------------------------------------------------------------------------------------------------------------------------------------------------------------------------------------------------------------------------------------------------------------------------------------------------------------------------------------------------------------------------------------------------------------------------------------------------------------------------------------------------------------------------------------------------------------------------------------------------------------------------------------------------------------------------------------------------------------------------------------------------------------------------------------------------------------------------------------------------------------------------------------------------------------------------------------------------------------------------------------------------------------------------------------------------------------------------------------------------------------------------------------------------------------------------------------------------------------------|-------|

|  |      |      |                                                                                                                         |                                                                                                                                                                                                                                                                                                                                                                                                                                                                                                                          |            |                                                                                                                                                                                                                                                                                                                                                                                                                                                                                                                                                                                                                                                                                                                                                                                                                                                                                                                                                                                                                                                                                                                                                                                                                                                                                                                                                                                                                                                                                                                    |       |
|--|------|------|-------------------------------------------------------------------------------------------------------------------------|--------------------------------------------------------------------------------------------------------------------------------------------------------------------------------------------------------------------------------------------------------------------------------------------------------------------------------------------------------------------------------------------------------------------------------------------------------------------------------------------------------------------------|------------|--------------------------------------------------------------------------------------------------------------------------------------------------------------------------------------------------------------------------------------------------------------------------------------------------------------------------------------------------------------------------------------------------------------------------------------------------------------------------------------------------------------------------------------------------------------------------------------------------------------------------------------------------------------------------------------------------------------------------------------------------------------------------------------------------------------------------------------------------------------------------------------------------------------------------------------------------------------------------------------------------------------------------------------------------------------------------------------------------------------------------------------------------------------------------------------------------------------------------------------------------------------------------------------------------------------------------------------------------------------------------------------------------------------------------------------------------------------------------------------------------------------------|-------|
|  | 1.37 | 2.57 | iron;<br>phosphorus<br>(no Fe and P<br>for 10d;<br>root) vs<br>untreated<br>root<br>samples<br>(sufficient<br>Fe and P) | Root samples of cultivar Nipponbare germinated for 2 days in distilled water and then floated for 10 days on the Yoshida nutrient solution (Yoshida et al., 1976, Laboratory Manual for Physiological Studies of Rice, Ed 3. International Rice Research Institute, Manila, The Philippines) lacking iron (FeCl <sub>3</sub> ) and phosphorus (NaH <sub>2</sub> PO <sub>4</sub> ). Other growth conditions: growth chamber, 12h light (450μmol photons m <sup>-2</sup> s <sup>-1</sup> ) at 30°C / 12h darkness at 22°C. | Nipponbare | Japonica ( <i>Oryza sativa</i> ssp. japonica) variety resistant to infection by the plant <i>Striga hermonthica</i> , an obligate root hemiparasite (Swarbrick et al., 2008, <i>New Phytol.</i> 179: 515-529). Nipponbare is susceptible to <i>Xanthomonas oryzae</i> pv. <i>oryzae</i> strains BAI3 (from Burkina Faso), PXO99A (from the Philippines; race 6), PXO86 (from the Philippines; race 2), T7174 (from Japan; race 1), and MAI1 (from Mali). Nipponbare is well transformable with <i>Agrobacterium tumefaciens</i> : using <i>A. tumefaciens</i> strain EHA 105, transient transformation frequency has been found to be 85.2%, stable transformation frequency 53.52% (Tie et al., 2012, <i>Plant Mol. Biol.</i> 78: 1-18). Nipponbare is susceptible to <i>Meloidogyne graminicola</i> , a root knot nematode that induces re-differentiation of root cells into multinucleate giant cells and formation of hook-like galls. Nipponbare is susceptible to <i>Magnaporthe oryzae</i> isolate FR13 (virulent isolate from France) and resistant to <i>M. oryzae</i> isolates CL3.6.7 (avirulent isolate) and BR32 (nonadapted isolate from Brazil) (Abbruscato et al., 2012, <i>Mol Plant Pathol.</i> ; Faivre-Rampant et al., 2008, <i>New Phytol.</i> 180: 899-910). This variety is sensitive to drought stress; drought index 0.54 (Wei et al., 2017, <i>Front Plant Sci.</i> 8: 473). Nipponbare is susceptible to Rice Stripe Virus (RSV) (Zhao et al., 2016, <i>New Phytol.</i> 210: 196-207). | roots |
|--|------|------|-------------------------------------------------------------------------------------------------------------------------|--------------------------------------------------------------------------------------------------------------------------------------------------------------------------------------------------------------------------------------------------------------------------------------------------------------------------------------------------------------------------------------------------------------------------------------------------------------------------------------------------------------------------|------------|--------------------------------------------------------------------------------------------------------------------------------------------------------------------------------------------------------------------------------------------------------------------------------------------------------------------------------------------------------------------------------------------------------------------------------------------------------------------------------------------------------------------------------------------------------------------------------------------------------------------------------------------------------------------------------------------------------------------------------------------------------------------------------------------------------------------------------------------------------------------------------------------------------------------------------------------------------------------------------------------------------------------------------------------------------------------------------------------------------------------------------------------------------------------------------------------------------------------------------------------------------------------------------------------------------------------------------------------------------------------------------------------------------------------------------------------------------------------------------------------------------------------|-------|

|  |  |  |                                                                            |                                                                                                                                                                                                                                                                                                                                                                                                                                                                                                                                                                             |            |                                                                                                                                                                                                                                                                                                                                                                                                                                                                                                                                                                                                                                                                                                                                                                                                                                                                                                                                                                                                                                                                                                                                                                                                                                                                                                                                                                                                                                                                                                                    |       |
|--|--|--|----------------------------------------------------------------------------|-----------------------------------------------------------------------------------------------------------------------------------------------------------------------------------------------------------------------------------------------------------------------------------------------------------------------------------------------------------------------------------------------------------------------------------------------------------------------------------------------------------------------------------------------------------------------------|------------|--------------------------------------------------------------------------------------------------------------------------------------------------------------------------------------------------------------------------------------------------------------------------------------------------------------------------------------------------------------------------------------------------------------------------------------------------------------------------------------------------------------------------------------------------------------------------------------------------------------------------------------------------------------------------------------------------------------------------------------------------------------------------------------------------------------------------------------------------------------------------------------------------------------------------------------------------------------------------------------------------------------------------------------------------------------------------------------------------------------------------------------------------------------------------------------------------------------------------------------------------------------------------------------------------------------------------------------------------------------------------------------------------------------------------------------------------------------------------------------------------------------------|-------|
|  |  |  | iron (no Fe for 10d; root) vs iron; phosphorus (no Fe and P for 10d; root) | Root samples of cultivar Nipponbare germinated for 2 days in distilled water and then floated for 10 days on the Yoshida nutrient solution (Yoshida et al., 1976, Laboratory Manual for Physiological Studies of Rice, Ed 3. International Rice Research Institute, Manila, The Philippines) with optimal phosphorus (0.323mM NaH <sub>2</sub> PO <sub>4</sub> ) concentration but lacking iron (FeCl <sub>3</sub> ) and citric acid. Other growth conditions: growth chamber, 12h light (450μmol photons m <sup>-2</sup> s <sup>-1</sup> ) at 30°C / 12h darkness at 22°C. | Nipponbare | Japonica ( <i>Oryza sativa</i> ssp. japonica) variety resistant to infection by the plant <i>Striga hermonthica</i> , an obligate root hemiparasite (Swarbrick et al., 2008, <i>New Phytol.</i> 179: 515-529). Nipponbare is susceptible to <i>Xanthomonas oryzae</i> pv. <i>oryzae</i> strains BAI3 (from Burkina Faso), PXO99A (from the Philippines; race 6), PXO86 (from the Philippines; race 2), T7174 (from Japan; race 1), and MAI1 (from Mali). Nipponbare is well transformable with <i>Agrobacterium tumefaciens</i> : using <i>A. tumefaciens</i> strain EHA 105, transient transformation frequency has been found to be 85.2%, stable transformation frequency 53.52% (Tie et al., 2012, <i>Plant Mol. Biol.</i> 78: 1-18). Nipponbare is susceptible to <i>Meloidogyne graminicola</i> , a root knot nematode that induces re-differentiation of root cells into multinucleate giant cells and formation of hook-like galls. Nipponbare is susceptible to <i>Magnaporthe oryzae</i> isolate FR13 (virulent isolate from France) and resistant to <i>M. oryzae</i> isolates CL3.6.7 (avirulent isolate) and BR32 (nonadapted isolate from Brazil) (Abbruscato et al., 2012, <i>Mol Plant Pathol.</i> ; Faivre-Rampant et al., 2008, <i>New Phytol.</i> 180: 899-910). This variety is sensitive to drought stress; drought index 0.54 (Wei et al., 2017, <i>Front Plant Sci.</i> 8: 473). Nipponbare is susceptible to Rice Stripe Virus (RSV) (Zhao et al., 2016, <i>New Phytol.</i> 210: 196-207). | roots |
|--|--|--|----------------------------------------------------------------------------|-----------------------------------------------------------------------------------------------------------------------------------------------------------------------------------------------------------------------------------------------------------------------------------------------------------------------------------------------------------------------------------------------------------------------------------------------------------------------------------------------------------------------------------------------------------------------------|------------|--------------------------------------------------------------------------------------------------------------------------------------------------------------------------------------------------------------------------------------------------------------------------------------------------------------------------------------------------------------------------------------------------------------------------------------------------------------------------------------------------------------------------------------------------------------------------------------------------------------------------------------------------------------------------------------------------------------------------------------------------------------------------------------------------------------------------------------------------------------------------------------------------------------------------------------------------------------------------------------------------------------------------------------------------------------------------------------------------------------------------------------------------------------------------------------------------------------------------------------------------------------------------------------------------------------------------------------------------------------------------------------------------------------------------------------------------------------------------------------------------------------------|-------|

|          |       |       |                                                                               |                                                                                                                                                                                                                                                                                                                                                                                                                                                                                                                                                                                                                                                                                                                                         |             |                                                                                                                                                                                                                                                                                                                                                                                                                                                                                                                                                                                                                                                                                                                                                                                                                                                                                                                                                                                                         |          |
|----------|-------|-------|-------------------------------------------------------------------------------|-----------------------------------------------------------------------------------------------------------------------------------------------------------------------------------------------------------------------------------------------------------------------------------------------------------------------------------------------------------------------------------------------------------------------------------------------------------------------------------------------------------------------------------------------------------------------------------------------------------------------------------------------------------------------------------------------------------------------------------------|-------------|---------------------------------------------------------------------------------------------------------------------------------------------------------------------------------------------------------------------------------------------------------------------------------------------------------------------------------------------------------------------------------------------------------------------------------------------------------------------------------------------------------------------------------------------------------------------------------------------------------------------------------------------------------------------------------------------------------------------------------------------------------------------------------------------------------------------------------------------------------------------------------------------------------------------------------------------------------------------------------------------------------|----------|
| OS-00091 | -1.13 | -2.19 | phosphorus (low Pi for 6h) untreated seedling samples (sufficient Pi)         | Seedling samples of cultivar Zhonghua 10 grown for 7 days in a nutrient solution with sufficient phosphate (0.323mM NaH <sub>2</sub> PO <sub>4</sub> ), then transferred to low phosphate (0.016mM NaH <sub>2</sub> PO <sub>4</sub> ) for 6h. Other components of the nutrient solution (pH 5.5): 1.425mM NH <sub>4</sub> NO <sub>3</sub> , 0.513mM K <sub>2</sub> SO <sub>4</sub> , 0.998mM CaCl <sub>2</sub> , 1.643mM MgSO <sub>4</sub> , 0.168mM Na <sub>2</sub> SiO <sub>3</sub> , 0.125mM Fe-EDTA, 0.019mM H <sub>3</sub> BO <sub>3</sub> , 0.009mM MnCl <sub>2</sub> , 0.155mM CuSO <sub>4</sub> , 0.152mM ZnSO <sub>4</sub> , 0.075mM Na <sub>2</sub> MoO <sub>4</sub> . Other conditions: 16h light at 30°C / 8h dark at 22°C. | Zhonghua 10 | Japonica ( <i>Oryza sativa</i> ssp. japonica) cultivar.                                                                                                                                                                                                                                                                                                                                                                                                                                                                                                                                                                                                                                                                                                                                                                                                                                                                                                                                                 | seedling |
| OS-00239 | -1.79 | -3.4  | phosphorus (Dular; 1μM Pi; root) vs phosphorus (Pusa Basmati 1; 1μM Pi; root) | Root samples of 15-day-old Dular seedlings grown in a phosphate deficient nutrient solution (1μM Pi); the solution (pH 5.5) was exchanged every 24h. Other growth conditions: growth chamber, 16h light (250-300μmol photons m <sup>-2</sup> s <sup>-1</sup> ) at 30°C / 8h darkness at 28°C cycles, 70% relative humidity. The nutrient solution as described in (Yoshida et al., 1976, Laboratory Manual for Physiological Studies of Rice, Ed 3, International Rice Research Institute, Manila, Philippines).                                                                                                                                                                                                                        | Dular       | Traditional <i>Oryza sativa</i> ssp. indica variety with very low yield potential (7-22q/ha) and high tolerance to low phosphate (Pi) content in the soil. Dular is more efficient in Pi utilization and better preserves root growth under Pi-limiting conditions than a low Pi-sensitive variety, Pusa Basmati 1. When plants were grown under low Pi (1μM) for 15 days, Dular root length was 9.38 ± 0.17cm while Pusa Basmati 1 root length was 7.41 ± 0.15cm. Under low Pi, Dular produced more and longer lateral roots than Pusa Basmati 1. Even though under sufficient Pi root and shoot Pi content was lower in Dular than in Pusa Basmati 1, under low Pi root and shoot Pi content was higher in Dular than in Pusa Basmati 1 (Mehra et al., 2016, Front Plant Sci. 6: 1184). Dular belongs to wide-compatibility variety (WCV) rice germplasms, i.e. Dular is able to produce fertile hybrids when crossed to indica or japonica varieties (Wang et al., 1998, Theor Appl Genet. 97: 407). | roots    |

|                         |          |      |      |                                                                                               |                                                                                                                                                                                                                                                              |                  |                                                                                                                                                                                                                                                                                                                                                                                                                                                                                                                                                                                                                                                                                                                                                                                                                                                                                                                                                      |       |
|-------------------------|----------|------|------|-----------------------------------------------------------------------------------------------|--------------------------------------------------------------------------------------------------------------------------------------------------------------------------------------------------------------------------------------------------------------|------------------|------------------------------------------------------------------------------------------------------------------------------------------------------------------------------------------------------------------------------------------------------------------------------------------------------------------------------------------------------------------------------------------------------------------------------------------------------------------------------------------------------------------------------------------------------------------------------------------------------------------------------------------------------------------------------------------------------------------------------------------------------------------------------------------------------------------------------------------------------------------------------------------------------------------------------------------------------|-------|
| <i>LOC_Os01g57440.1</i> | OS-00096 | 1.04 | 2.06 | phosphorus (35S::PSTOL1 (20); no P fertilizer) vs phosphorus (35S::PSTOL1 (20); 60kg/ha P2O5) | Root samples of 35S::PSTOL1 (20) line grown till the heading stage on phosphorus-deficient soil from Siniloan, Luzon, the Philippines (P-Bray, $1.23 \pm 0.30$ mgkg <sup>-1</sup> ; P-Olsen, $0.77 \pm 0.46$ mgkg <sup>-1</sup> ) under dry-down conditions. | 35S::PSTOL1 (20) | Phosphorus-starvation-tolerant transgenic line 20 (cv. IR64 background) carrying full-length coding region (CDS) of PSTOL1 under control of the constitutive CaMV35S promoter and NOS terminator. The PSTOL1 CDS is derived from <i>O. sativa indica</i> cultivar Kasalath. PSTOL1 (Phosphorus-starvation tolerance 1; OsPupK46-2) encodes a functional serine/threonine protein kinase and is absent in genomes of phosphorus-starvation-intolerant rice varieties such as IR64, Nipponbare. 35S::PSTOL1 (20) plants grown on phosphorus-unfertilized soil have larger root system and produce approx. 60% more seeds than the control IR64-null plants (segregants without the transgene). Compared to the non-transgenic IR64-null control, total root length and surface area of 35S::PSTOL1 (20) plants is increased not only under low-phosphorus but also under phosphorus-sufficient conditions (Gamuyao et al., 2012, Nature 488: 535-539). | roots |
| <i>LOC_Os01g57450.1</i> |          |      |      |                                                                                               |                                                                                                                                                                                                                                                              |                  |                                                                                                                                                                                                                                                                                                                                                                                                                                                                                                                                                                                                                                                                                                                                                                                                                                                                                                                                                      |       |
| <i>LOC_Os01g57460.1</i> | OS-00096 | 1.26 | 2.4  | phosphorus (35S::PSTOL1 (20); no P fertilizer) vs phosphorus (35S::PSTOL1 (20); 60kg/ha P2O5) | Root samples of 35S::PSTOL1 (20) line grown till the heading stage on phosphorus-deficient soil from Siniloan, Luzon, the Philippines (P-Bray, $1.23 \pm 0.30$ mgkg <sup>-1</sup> ; P-Olsen, $0.77 \pm 0.46$ mgkg <sup>-1</sup> ) under dry-down conditions. | 35S::PSTOL1 (20) | Phosphorus-starvation-tolerant transgenic line 20 (cv. IR64 background) carrying full-length coding region (CDS) of PSTOL1 under control of the constitutive CaMV35S promoter and NOS terminator. The PSTOL1 CDS is derived from <i>O. sativa indica</i> cultivar Kasalath. PSTOL1 (Phosphorus-starvation tolerance 1; OsPupK46-2) encodes a functional serine/threonine protein kinase and is absent in genomes of phosphorus-starvation-intolerant rice varieties such as IR64, Nipponbare. 35S::PSTOL1 (20) plants grown on phosphorus-unfertilized soil have larger root system and produce approx. 60% more seeds than the control IR64-null plants (segregants without the transgene). Compared to the non-transgenic IR64-null control, total root length and surface area of 35S::PSTOL1 (20) plants is increased not only under low-phosphorus but also under phosphorus-sufficient conditions (Gamuyao et al., 2012, Nature 488: 535-539). | roots |

|                  |          |      |      |                                                                                               |                                                                                                                                                                                                                                                                                                                                  |                  |                                                                                                                                                                                                                                                                                                                                                                                                                                                                                                                                                                                                                                                                                                                                                                                                                                                                                                                                                      |       |
|------------------|----------|------|------|-----------------------------------------------------------------------------------------------|----------------------------------------------------------------------------------------------------------------------------------------------------------------------------------------------------------------------------------------------------------------------------------------------------------------------------------|------------------|------------------------------------------------------------------------------------------------------------------------------------------------------------------------------------------------------------------------------------------------------------------------------------------------------------------------------------------------------------------------------------------------------------------------------------------------------------------------------------------------------------------------------------------------------------------------------------------------------------------------------------------------------------------------------------------------------------------------------------------------------------------------------------------------------------------------------------------------------------------------------------------------------------------------------------------------------|-------|
| LOC_Os01g57470.1 | OS-00096 | 2.6  | 4.11 | phosphorus (35S::PSTOL1 (20); no P fertilizer) vs phosphorus (35S::PSTOL1 (20); 60kg/ha P2O5) | Root samples of 35S::PSTOL1 (20) line grown till the heading stage on phosphorus-deficient soil from Siniloan, Luzon, the Philippines (P-Bray, $1.23 \pm 0.30$ mgkg <sup>-1</sup> ; P-Olsen, $0.77 \pm 0.46$ mgkg <sup>-1</sup> ) under dry-down conditions.                                                                     | 35S::PSTOL1 (20) | Phosphorus-starvation-tolerant transgenic line 20 (cv. IR64 background) carrying full-length coding region (CDS) of PSTOL1 under control of the constitutive CaMV35S promoter and NOS terminator. The PSTOL1 CDS is derived from <i>O. sativa indica</i> cultivar Kasalath. PSTOL1 (Phosphorus-starvation tolerance 1; OsPupK46-2) encodes a functional serine/threonine protein kinase and is absent in genomes of phosphorus-starvation-intolerant rice varieties such as IR64, Nipponbare. 35S::PSTOL1 (20) plants grown on phosphorus-unfertilized soil have larger root system and produce approx. 60% more seeds than the control IR64-null plants (segregants without the transgene). Compared to the non-transgenic IR64-null control, total root length and surface area of 35S::PSTOL1 (20) plants is increased not only under low-phosphorus but also under phosphorus-sufficient conditions (Gamuyao et al., 2012, Nature 488: 535-539). | roots |
|                  | OS-00003 | 1.44 | 2.57 | arsenate (Azucena) vs untreated root samples (Azucena)                                        | Root samples of rice variety Azucena grown for 7 days in hydroponics on phosphate-free nutrient solution containing 0.1mM Mg <sup>2+</sup> and SO <sub>4</sub> <sup>2-</sup> , 0.2mM Ca <sup>2+</sup> and K <sup>+</sup> , 0.6mM NO <sub>3</sub> <sup>-</sup> , and 1ppm (13.3μM) arsenate (Na <sub>2</sub> HAsO <sub>4</sub> ). | Azucena          | Traditional japonica ( <i>Oryza sativa</i> ssp. japonica) upland cultivar; origin: the Philippines. Azucena is resistant to aluminum stress (Al <sup>3+</sup> ) (Arbelaez et al., 2017, Plant Direct 1).                                                                                                                                                                                                                                                                                                                                                                                                                                                                                                                                                                                                                                                                                                                                             | roots |

LOC\_Os01g57480.1

|          |       |       |                                                                                   |                                                                                                                                                                                                                                                                                                                                                                                                                                                                                                                     |       |                                                                                                                                                                                                                                                                                                                                                                                                                                                                                                                                                                                                                                                                                                                                                                                                                                                                                                                                                                                                        |       |
|----------|-------|-------|-----------------------------------------------------------------------------------|---------------------------------------------------------------------------------------------------------------------------------------------------------------------------------------------------------------------------------------------------------------------------------------------------------------------------------------------------------------------------------------------------------------------------------------------------------------------------------------------------------------------|-------|--------------------------------------------------------------------------------------------------------------------------------------------------------------------------------------------------------------------------------------------------------------------------------------------------------------------------------------------------------------------------------------------------------------------------------------------------------------------------------------------------------------------------------------------------------------------------------------------------------------------------------------------------------------------------------------------------------------------------------------------------------------------------------------------------------------------------------------------------------------------------------------------------------------------------------------------------------------------------------------------------------|-------|
| OS-00230 | -1.92 | -3.77 | phosphorus (Dular; 1μM Pi; shoot) vs phosphorus (Pusa Basmati 1; 1μM Pi; shoot)   | Shoot samples of 15-day-old Dular seedlings grown in a phosphate deficient nutrient solution (1μM Pi); the solution (pH 5.5) was exchanged every 24h. Other growth conditions: growth chamber, 16h light (250-300μmol photons m <sup>-2</sup> s <sup>-1</sup> ) at 30°C / 8h darkness at 28°C cycles, 70% relative humidity. The nutrient solution as described in (Yoshida et al., 1976, Laboratory Manual for Physiological Studies of Rice, Ed 3, International Rice Research Institute, Manila, Philippines).   | Dular | Traditional <i>Oryza sativa</i> ssp. indica variety with very low yield potential (7-22q/ha) and high tolerance to low phosphate (Pi) content in the soil. Dular is more efficient in Pi utilization and better preserves root growth under Pi-limiting conditions than a low Pi-sensitive variety, Pusa Basmati 1. When plants were grown under low Pi (1μM) for 15 days, Dular root length was 9.38 ± 0.17cm while Pusa Basmati 1 root length was 7.41 ± 0.15cm. Under low Pi, Dular produced more and longer lateral roots than Pusa Basmati 1. Even though under sufficient Pi root and shoot Pi content was lower in Dular than in Pusa Basmati 1, under low Pi root and shoot Pi content was higher in Dular than in Pusa Basmati 1 (Mehra et al., 2016, Front Plant Sci. 6: 1184). Dular belongs to wide-compatibility variety (WCV) rice germplasm, i.e. Dular is able to produce fertile hybrids when crossed to indica or japonica varieties (Wang et al., 1998, Theor Appl Genet. 97: 407). | shoot |
|          | -2.55 | -4.68 | phosphorus (Dular; 320μM Pi; root) vs phosphorus (Pusa Basmati 1; 320μM Pi; root) | Root samples of 15-day-old Dular seedlings grown in a phosphate sufficient nutrient solution (320μM Pi); the solution (pH 5.5) was exchanged every 24h. Other growth conditions: growth chamber, 16h light (250-300μmol photons m <sup>-2</sup> s <sup>-1</sup> ) at 30°C / 8h darkness at 28°C cycles, 70% relative humidity. The nutrient solution as described in (Yoshida et al., 1976, Laboratory Manual for Physiological Studies of Rice, Ed 3, International Rice Research Institute, Manila, Philippines). | Dular | Traditional <i>Oryza sativa</i> ssp. indica variety with very low yield potential (7-22q/ha) and high tolerance to low phosphate (Pi) content in the soil. Dular is more efficient in Pi utilization and better preserves root growth under Pi-limiting conditions than a low Pi-sensitive variety, Pusa Basmati 1. When plants were grown under low Pi (1μM) for 15 days, Dular root length was 9.38 ± 0.17cm while Pusa Basmati 1 root length was 7.41 ± 0.15cm. Under low Pi, Dular produced more and longer lateral roots than Pusa Basmati 1. Even though under sufficient Pi root and shoot Pi content was lower in Dular than in Pusa Basmati 1, under low Pi root and shoot Pi content was higher in Dular than in Pusa Basmati 1 (Mehra et al., 2016, Front Plant Sci. 6: 1184). Dular belongs to wide-compatibility variety (WCV) rice germplasm, i.e. Dular is able to produce fertile hybrids when crossed to indica or japonica varieties (Wang et al., 1998, Theor Appl Genet. 97: 407). | roots |

|                  |          |       |       |                                                                                     |                                                                                                                                                                                                                                                                                                                                                                                                                                                                                                                      |       |                                                                                                                                                                                                                                                                                                                                                                                                                                                                                                                                                                                                                                                                                                                                                                                                                                                                                                                                                                                                        |       |
|------------------|----------|-------|-------|-------------------------------------------------------------------------------------|----------------------------------------------------------------------------------------------------------------------------------------------------------------------------------------------------------------------------------------------------------------------------------------------------------------------------------------------------------------------------------------------------------------------------------------------------------------------------------------------------------------------|-------|--------------------------------------------------------------------------------------------------------------------------------------------------------------------------------------------------------------------------------------------------------------------------------------------------------------------------------------------------------------------------------------------------------------------------------------------------------------------------------------------------------------------------------------------------------------------------------------------------------------------------------------------------------------------------------------------------------------------------------------------------------------------------------------------------------------------------------------------------------------------------------------------------------------------------------------------------------------------------------------------------------|-------|
|                  | OS-00239 | -2.35 | -5.01 | phosphorus (Dular; 1µM Pi; root) vs phosphorus (Pusa Basmati 1; 1µM Pi; root)       | Root samples of 15-day-old Dular seedlings grown in a phosphate deficient nutrient solution (1µM Pi); the solution (pH 5.5) was exchanged every 24h. Other growth conditions: growth chamber, 16h light (250-300µmol photons m <sup>-2</sup> s <sup>-1</sup> ) at 30°C / 8h darkness at 28°C cycles, 70% relative humidity. The nutrient solution as described in (Yoshida et al., 1976, Laboratory Manual for Physiological Studies of Rice, Ed 3, International Rice Research Institute, Manila, Philippines).     | Dular | Traditional <i>Oryza sativa</i> ssp. indica variety with very low yield potential (7-22q/ha) and high tolerance to low phosphate (Pi) content in the soil. Dular is more efficient in Pi utilization and better preserves root growth under Pi-limiting conditions than a low Pi-sensitive variety, Pusa Basmati 1. When plants were grown under low Pi (1µM) for 15 days, Dular root length was 9.38 ± 0.17cm while Pusa Basmati 1 root length was 7.41 ± 0.15cm. Under low Pi, Dular produced more and longer lateral roots than Pusa Basmati 1. Even though under sufficient Pi root and shoot Pi content was lower in Dular than in Pusa Basmati 1, under low Pi root and shoot Pi content was higher in Dular than in Pusa Basmati 1 (Mehra et al., 2016, Front Plant Sci. 6: 1184). Dular belongs to wide-compatibility variety (WCV) rice germplasm, i.e. Dular is able to produce fertile hybrids when crossed to indica or japonica varieties (Wang et al., 1998, Theor Appl Genet. 97: 407). | roots |
|                  |          | -2.4  | -5.34 | phosphorus (Dular; 320µM Pi; shoot) vs phosphorus (Pusa Basmati 1; 320µM Pi; shoot) | Shoot samples of 15-day-old Dular seedlings grown in a phosphate sufficient nutrient solution (320µM Pi); the solution (pH 5.5) was exchanged every 24h. Other growth conditions: growth chamber, 16h light (250-300µmol photons m <sup>-2</sup> s <sup>-1</sup> ) at 30°C / 8h darkness at 28°C cycles, 70% relative humidity. The nutrient solution as described in (Yoshida et al., 1976, Laboratory Manual for Physiological Studies of Rice, Ed 3, International Rice Research Institute, Manila, Philippines). | Dular | Traditional <i>Oryza sativa</i> ssp. indica variety with very low yield potential (7-22q/ha) and high tolerance to low phosphate (Pi) content in the soil. Dular is more efficient in Pi utilization and better preserves root growth under Pi-limiting conditions than a low Pi-sensitive variety, Pusa Basmati 1. When plants were grown under low Pi (1µM) for 15 days, Dular root length was 9.38 ± 0.17cm while Pusa Basmati 1 root length was 7.41 ± 0.15cm. Under low Pi, Dular produced more and longer lateral roots than Pusa Basmati 1. Even though under sufficient Pi root and shoot Pi content was lower in Dular than in Pusa Basmati 1, under low Pi root and shoot Pi content was higher in Dular than in Pusa Basmati 1 (Mehra et al., 2016, Front Plant Sci. 6: 1184). Dular belongs to wide-compatibility variety (WCV) rice germplasm, i.e. Dular is able to produce fertile hybrids when crossed to indica or japonica varieties (Wang et al., 1998, Theor Appl Genet. 97: 407). | shoot |
| LOC_Os01g57490.1 |          |       |       |                                                                                     |                                                                                                                                                                                                                                                                                                                                                                                                                                                                                                                      |       |                                                                                                                                                                                                                                                                                                                                                                                                                                                                                                                                                                                                                                                                                                                                                                                                                                                                                                                                                                                                        |       |
| LOC_Os01g66070.1 |          |       |       |                                                                                     |                                                                                                                                                                                                                                                                                                                                                                                                                                                                                                                      |       |                                                                                                                                                                                                                                                                                                                                                                                                                                                                                                                                                                                                                                                                                                                                                                                                                                                                                                                                                                                                        |       |



|  |          |      |      |                                                                           |                                                                                                                                                                                                                                                                                                                                                                                                                                                                                                                                                                                                                                                                                                                                           |             |                                                         |          |
|--|----------|------|------|---------------------------------------------------------------------------|-------------------------------------------------------------------------------------------------------------------------------------------------------------------------------------------------------------------------------------------------------------------------------------------------------------------------------------------------------------------------------------------------------------------------------------------------------------------------------------------------------------------------------------------------------------------------------------------------------------------------------------------------------------------------------------------------------------------------------------------|-------------|---------------------------------------------------------|----------|
|  | OS-00091 | 1.42 | 2.69 | phosphorus (low Pi for 24h) vs untreated seedling samples (sufficient Pi) | Seedling samples of cultivar Zhonghua 10 grown for 7 days in a nutrient solution with sufficient phosphate (0.323mM NaH <sub>2</sub> PO <sub>4</sub> ), then transferred to low phosphate (0.016 mM NaH <sub>2</sub> PO <sub>4</sub> ) for 24h. Other components of the nutrient solution (pH 5.5): 1.425mM NH <sub>4</sub> NO <sub>3</sub> , 0.513mM K <sub>2</sub> SO <sub>4</sub> , 0.998mM CaCl <sub>2</sub> , 1.643mM MgSO <sub>4</sub> , 0.168mM Na <sub>2</sub> SiO <sub>3</sub> , 0.125mM Fe-EDTA, 0.019mM H <sub>3</sub> BO <sub>3</sub> , 0.009mM MnCl <sub>2</sub> , 0.155mM CuSO <sub>4</sub> , 0.152mM ZnSO <sub>4</sub> , 0.075mM Na <sub>2</sub> MoO <sub>4</sub> . Other conditions: 16h light at 30°C / 8h dark at 22°C. | Zhonghua 10 | Japonica ( <i>Oryza sativa</i> ssp. japonica) cultivar. | seedling |
|--|----------|------|------|---------------------------------------------------------------------------|-------------------------------------------------------------------------------------------------------------------------------------------------------------------------------------------------------------------------------------------------------------------------------------------------------------------------------------------------------------------------------------------------------------------------------------------------------------------------------------------------------------------------------------------------------------------------------------------------------------------------------------------------------------------------------------------------------------------------------------------|-------------|---------------------------------------------------------|----------|

|          |      |      |                                                                              |                                                                                                                                                                                                                                                                                                                                                                                                                                                                                                                                                                              |            |                                                                                                                                                                                                                                                                                                                                                                                                                                                                                                                                                                                                                                                                                                                                                                                                                                                                                                                                                                                                                                                                                                                                                                                                                                                                                                                                                                                                                                                                                                                    |       |
|----------|------|------|------------------------------------------------------------------------------|------------------------------------------------------------------------------------------------------------------------------------------------------------------------------------------------------------------------------------------------------------------------------------------------------------------------------------------------------------------------------------------------------------------------------------------------------------------------------------------------------------------------------------------------------------------------------|------------|--------------------------------------------------------------------------------------------------------------------------------------------------------------------------------------------------------------------------------------------------------------------------------------------------------------------------------------------------------------------------------------------------------------------------------------------------------------------------------------------------------------------------------------------------------------------------------------------------------------------------------------------------------------------------------------------------------------------------------------------------------------------------------------------------------------------------------------------------------------------------------------------------------------------------------------------------------------------------------------------------------------------------------------------------------------------------------------------------------------------------------------------------------------------------------------------------------------------------------------------------------------------------------------------------------------------------------------------------------------------------------------------------------------------------------------------------------------------------------------------------------------------|-------|
| OS-00036 | 1.41 | 2.67 | iron (no Fe for 10d; shoot) vs iron; phosphorus (no Fe and P for 10d; shoot) | Shoot samples of cultivar Nipponbare germinated for 2 days in distilled water and then floated for 10 days on the Yoshida nutrient solution (Yoshida et al., 1976, Laboratory Manual for Physiological Studies of Rice, Ed 3. International Rice Research Institute, Manila, The Philippines) with optimal phosphorus (0.323mM NaH <sub>2</sub> PO <sub>4</sub> ) concentration but lacking iron (FeCl <sub>3</sub> ) and citric acid. Other growth conditions: growth chamber, 12h light (450μmol photons m <sup>-2</sup> s <sup>-1</sup> ) at 30°C / 12h darkness at 22°C. | Nipponbare | Japonica ( <i>Oryza sativa</i> ssp. japonica) variety resistant to infection by the plant <i>Striga hermonthica</i> , an obligate root hemiparasite (Swarbrick et al., 2008, <i>New Phytol.</i> 179: 515-529). Nipponbare is susceptible to <i>Xanthomonas oryzae</i> pv. <i>oryzae</i> strains BAI3 (from Burkina Faso), PXO99A (from the Philippines; race 6), PXO86 (from the Philippines; race 2), T7174 (from Japan; race 1), and MAI1 (from Mali). Nipponbare is well transformable with <i>Agrobacterium tumefaciens</i> : using <i>A. tumefaciens</i> strain EHA 105, transient transformation frequency has been found to be 85.2%, stable transformation frequency 53.52% (Tie et al., 2012, <i>Plant Mol. Biol.</i> 78: 1-18). Nipponbare is susceptible to <i>Meloidogyne graminicola</i> , a root knot nematode that induces re-differentiation of root cells into multinucleate giant cells and formation of hook-like galls. Nipponbare is susceptible to <i>Magnaporthe oryzae</i> isolate FR13 (virulent isolate from France) and resistant to <i>M. oryzae</i> isolates CL3.6.7 (avirulent isolate) and BR32 (nonadapted isolate from Brazil) (Abbruscato et al., 2012, <i>Mol Plant Pathol.</i> ; Faivre-Rampant et al., 2008, <i>New Phytol.</i> 180: 899-910). This variety is sensitive to drought stress; drought index 0.54 (Wei et al., 2017, <i>Front Plant Sci.</i> 8: 473). Nipponbare is susceptible to Rice Stripe Virus (RSV) (Zhao et al., 2016, <i>New Phytol.</i> 210: 196-207). | shoot |
|----------|------|------|------------------------------------------------------------------------------|------------------------------------------------------------------------------------------------------------------------------------------------------------------------------------------------------------------------------------------------------------------------------------------------------------------------------------------------------------------------------------------------------------------------------------------------------------------------------------------------------------------------------------------------------------------------------|------------|--------------------------------------------------------------------------------------------------------------------------------------------------------------------------------------------------------------------------------------------------------------------------------------------------------------------------------------------------------------------------------------------------------------------------------------------------------------------------------------------------------------------------------------------------------------------------------------------------------------------------------------------------------------------------------------------------------------------------------------------------------------------------------------------------------------------------------------------------------------------------------------------------------------------------------------------------------------------------------------------------------------------------------------------------------------------------------------------------------------------------------------------------------------------------------------------------------------------------------------------------------------------------------------------------------------------------------------------------------------------------------------------------------------------------------------------------------------------------------------------------------------------|-------|

|          |      |      |                                                                                                        |                                                                                                                                                                                                                                                                                                                                                                                                                                                                                                                                        |                |                                                                                                                                                                                                                                                                                                                                                                                                                                                                                   |       |
|----------|------|------|--------------------------------------------------------------------------------------------------------|----------------------------------------------------------------------------------------------------------------------------------------------------------------------------------------------------------------------------------------------------------------------------------------------------------------------------------------------------------------------------------------------------------------------------------------------------------------------------------------------------------------------------------------|----------------|-----------------------------------------------------------------------------------------------------------------------------------------------------------------------------------------------------------------------------------------------------------------------------------------------------------------------------------------------------------------------------------------------------------------------------------------------------------------------------------|-------|
| OS-00239 | 1.37 | 3.14 | phosphorus (Pusa Basmati 1; 1 $\mu$ M Pi; shoot) vs phosphorus (Pusa Basmati 1; 320 $\mu$ M Pi; shoot) | Shoot samples of 15-day-old Pusa Basmati 1 seedlings grown in a phosphate deficient nutrient solution (1 $\mu$ M Pi); the solution (pH 5.5) was exchanged every 24h. Other growth conditions: growth chamber, 16h light (250-300 $\mu$ mol photons m <sup>-2</sup> s <sup>-1</sup> ) at 30°C / 8h darkness at 28°C cycles, 70% relative humidity. The nutrient solution as described in (Yoshida et al., 1976, Laboratory Manual for Physiological Studies of Rice, Ed 3, International Rice Research Institute, Manila, Philippines). | Pusa Basmati 1 | Semi-dwarf aromatic (Evolved Basmati) cultivar developed by The Indian Agricultural Research Institute (IARI), released in 1989. Low number of seeds (approx. 181) per panicle (Deshmukh et al., 2010, Funct Integr Genomics 10: 339-47). Pusa Basmati 1 is susceptible to Magnaporthe oryzae strain Mo-nwi-53 (Jain et al., 2017, Front Plant Sci. 8: 93). Pusa Basmati 1 is sensitive to low phosphate (Pi) content in the soil (Mehra et al., 2016, Front Plant Sci. 6: 1184). | shoot |
|----------|------|------|--------------------------------------------------------------------------------------------------------|----------------------------------------------------------------------------------------------------------------------------------------------------------------------------------------------------------------------------------------------------------------------------------------------------------------------------------------------------------------------------------------------------------------------------------------------------------------------------------------------------------------------------------------|----------------|-----------------------------------------------------------------------------------------------------------------------------------------------------------------------------------------------------------------------------------------------------------------------------------------------------------------------------------------------------------------------------------------------------------------------------------------------------------------------------------|-------|

|  |      |      |                                                                              |                                                                                                                                                                                                                                                                                                                                                                                                                                                                                                                                                                              |            |                                                                                                                                                                                                                                                                                                                                                                                                                                                                                                                                                                                                                                                                                                                                                                                                                                                                                                                                                                                                                                                                                                                                                                                                                                                                                                                                                                                                                                                                                                                    |       |
|--|------|------|------------------------------------------------------------------------------|------------------------------------------------------------------------------------------------------------------------------------------------------------------------------------------------------------------------------------------------------------------------------------------------------------------------------------------------------------------------------------------------------------------------------------------------------------------------------------------------------------------------------------------------------------------------------|------------|--------------------------------------------------------------------------------------------------------------------------------------------------------------------------------------------------------------------------------------------------------------------------------------------------------------------------------------------------------------------------------------------------------------------------------------------------------------------------------------------------------------------------------------------------------------------------------------------------------------------------------------------------------------------------------------------------------------------------------------------------------------------------------------------------------------------------------------------------------------------------------------------------------------------------------------------------------------------------------------------------------------------------------------------------------------------------------------------------------------------------------------------------------------------------------------------------------------------------------------------------------------------------------------------------------------------------------------------------------------------------------------------------------------------------------------------------------------------------------------------------------------------|-------|
|  | 1.25 | 2.41 | iron (no Fe for 10d; shoot) vs untreated shoot samples (sufficient Fe and P) | Shoot samples of cultivar Nipponbare germinated for 2 days in distilled water and then floated for 10 days on the Yoshida nutrient solution (Yoshida et al., 1976, Laboratory Manual for Physiological Studies of Rice, Ed 3. International Rice Research Institute, Manila, The Philippines) with optimal phosphorus (0.323mM NaH <sub>2</sub> PO <sub>4</sub> ) concentration but lacking iron (FeCl <sub>3</sub> ) and citric acid. Other growth conditions: growth chamber, 12h light (450μmol photons m <sup>-2</sup> s <sup>-1</sup> ) at 30°C / 12h darkness at 22°C. | Nipponbare | Japonica ( <i>Oryza sativa</i> ssp. japonica) variety resistant to infection by the plant <i>Striga hermonthica</i> , an obligate root hemiparasite (Swarbrick et al., 2008, <i>New Phytol.</i> 179: 515-529). Nipponbare is susceptible to <i>Xanthomonas oryzae</i> pv. <i>oryzae</i> strains BAI3 (from Burkina Faso), PXO99A (from the Philippines; race 6), PXO86 (from the Philippines; race 2), T7174 (from Japan; race 1), and MAI1 (from Mali). Nipponbare is well transformable with <i>Agrobacterium tumefaciens</i> : using <i>A. tumefaciens</i> strain EHA 105, transient transformation frequency has been found to be 85.2%, stable transformation frequency 53.52% (Tie et al., 2012, <i>Plant Mol. Biol.</i> 78: 1-18). Nipponbare is susceptible to <i>Meloidogyne graminicola</i> , a root knot nematode that induces re-differentiation of root cells into multinucleate giant cells and formation of hook-like galls. Nipponbare is susceptible to <i>Magnaporthe oryzae</i> isolate FR13 (virulent isolate from France) and resistant to <i>M. oryzae</i> isolates CL3.6.7 (avirulent isolate) and BR32 (nonadapted isolate from Brazil) (Abbruscato et al., 2012, <i>Mol Plant Pathol.</i> ; Faivre-Rampant et al., 2008, <i>New Phytol.</i> 180: 899-910). This variety is sensitive to drought stress; drought index 0.54 (Wei et al., 2017, <i>Front Plant Sci.</i> 8: 473). Nipponbare is susceptible to Rice Stripe Virus (RSV) (Zhao et al., 2016, <i>New Phytol.</i> 210: 196-207). | shoot |
|--|------|------|------------------------------------------------------------------------------|------------------------------------------------------------------------------------------------------------------------------------------------------------------------------------------------------------------------------------------------------------------------------------------------------------------------------------------------------------------------------------------------------------------------------------------------------------------------------------------------------------------------------------------------------------------------------|------------|--------------------------------------------------------------------------------------------------------------------------------------------------------------------------------------------------------------------------------------------------------------------------------------------------------------------------------------------------------------------------------------------------------------------------------------------------------------------------------------------------------------------------------------------------------------------------------------------------------------------------------------------------------------------------------------------------------------------------------------------------------------------------------------------------------------------------------------------------------------------------------------------------------------------------------------------------------------------------------------------------------------------------------------------------------------------------------------------------------------------------------------------------------------------------------------------------------------------------------------------------------------------------------------------------------------------------------------------------------------------------------------------------------------------------------------------------------------------------------------------------------------------|-------|

LOC\_Os01g66100.1

|          |      |      |                                                                                   |                                                                                                                                                                                                                                                                                                                                                                                                                                                                                                                        |            |                                                                                                                                                                                                                                                                                                                                                                                                                                                                                                                                                                                                                                                                                                                                                                                                                                                                                                                                                                                                                                                                                                                                                                                                                                                                                                                                                                                                                                                                                                                    |       |
|----------|------|------|-----------------------------------------------------------------------------------|------------------------------------------------------------------------------------------------------------------------------------------------------------------------------------------------------------------------------------------------------------------------------------------------------------------------------------------------------------------------------------------------------------------------------------------------------------------------------------------------------------------------|------------|--------------------------------------------------------------------------------------------------------------------------------------------------------------------------------------------------------------------------------------------------------------------------------------------------------------------------------------------------------------------------------------------------------------------------------------------------------------------------------------------------------------------------------------------------------------------------------------------------------------------------------------------------------------------------------------------------------------------------------------------------------------------------------------------------------------------------------------------------------------------------------------------------------------------------------------------------------------------------------------------------------------------------------------------------------------------------------------------------------------------------------------------------------------------------------------------------------------------------------------------------------------------------------------------------------------------------------------------------------------------------------------------------------------------------------------------------------------------------------------------------------------------|-------|
| OS-00036 | 1.24 | 2.35 | phosphorus (no P for 10d; shoot) vs iron; phosphorus (no Fe and P for 10d; shoot) | Shoot samples of cultivar Nipponbare germinated for 2 days in distilled water and then floated for 10 days on the Yoshida nutrient solution (Yoshida et al., 1976, Laboratory Manual for Physiological Studies of Rice, Ed 3. International Rice Research Institute, Manila, The Philippines) with optimal iron (0.036mM FeCl3) concentration but lacking phosphorus (NaH2PO4). Other growth conditions: growth chamber, 12h light (450 mmol photons m <sup>-2</sup> s <sup>-1</sup> ) at 30°C / 12h darkness at 22°C. | Nipponbare | Japonica ( <i>Oryza sativa</i> ssp. japonica) variety resistant to infection by the plant <i>Striga hermonthica</i> , an obligate root hemiparasite (Swarbrick et al., 2008, <i>New Phytol.</i> 179: 515-529). Nipponbare is susceptible to <i>Xanthomonas oryzae</i> pv. <i>oryzae</i> strains BAI3 (from Burkina Faso), PXO99A (from the Philippines; race 6), PXO86 (from the Philippines; race 2), T7174 (from Japan; race 1), and MAI1 (from Mali). Nipponbare is well transformable with <i>Agrobacterium tumefaciens</i> : using <i>A. tumefaciens</i> strain EHA 105, transient transformation frequency has been found to be 85.2%, stable transformation frequency 53.52% (Tie et al., 2012, <i>Plant Mol. Biol.</i> 78: 1-18). Nipponbare is susceptible to <i>Meloidogyne graminicola</i> , a root knot nematode that induces re-differentiation of root cells into multinucleate giant cells and formation of hook-like galls. Nipponbare is susceptible to <i>Magnaporthe oryzae</i> isolate FR13 (virulent isolate from France) and resistant to <i>M. oryzae</i> isolates CL3.6.7 (avirulent isolate) and BR32 (nonadapted isolate from Brazil) (Abbruscato et al., 2012, <i>Mol Plant Pathol.</i> ; Faivre-Rampant et al., 2008, <i>New Phytol.</i> 180: 899-910). This variety is sensitive to drought stress; drought index 0.54 (Wei et al., 2017, <i>Front Plant Sci.</i> 8: 473). Nipponbare is susceptible to Rice Stripe Virus (RSV) (Zhao et al., 2016, <i>New Phytol.</i> 210: 196-207). | shoot |
|----------|------|------|-----------------------------------------------------------------------------------|------------------------------------------------------------------------------------------------------------------------------------------------------------------------------------------------------------------------------------------------------------------------------------------------------------------------------------------------------------------------------------------------------------------------------------------------------------------------------------------------------------------------|------------|--------------------------------------------------------------------------------------------------------------------------------------------------------------------------------------------------------------------------------------------------------------------------------------------------------------------------------------------------------------------------------------------------------------------------------------------------------------------------------------------------------------------------------------------------------------------------------------------------------------------------------------------------------------------------------------------------------------------------------------------------------------------------------------------------------------------------------------------------------------------------------------------------------------------------------------------------------------------------------------------------------------------------------------------------------------------------------------------------------------------------------------------------------------------------------------------------------------------------------------------------------------------------------------------------------------------------------------------------------------------------------------------------------------------------------------------------------------------------------------------------------------------|-------|

|      |      |                                                                                   |                                                                                                                                                                                                                                                                                                                                                                                                                                                                                                                        |            |                                                                                                                                                                                                                                                                                                                                                                                                                                                                                                                                                                                                                                                                                                                                                                                                                                                                                                                                                                                                                                                                                                                                                                                                                                                                                                                                                                                                                                                                                                                    |       |
|------|------|-----------------------------------------------------------------------------------|------------------------------------------------------------------------------------------------------------------------------------------------------------------------------------------------------------------------------------------------------------------------------------------------------------------------------------------------------------------------------------------------------------------------------------------------------------------------------------------------------------------------|------------|--------------------------------------------------------------------------------------------------------------------------------------------------------------------------------------------------------------------------------------------------------------------------------------------------------------------------------------------------------------------------------------------------------------------------------------------------------------------------------------------------------------------------------------------------------------------------------------------------------------------------------------------------------------------------------------------------------------------------------------------------------------------------------------------------------------------------------------------------------------------------------------------------------------------------------------------------------------------------------------------------------------------------------------------------------------------------------------------------------------------------------------------------------------------------------------------------------------------------------------------------------------------------------------------------------------------------------------------------------------------------------------------------------------------------------------------------------------------------------------------------------------------|-------|
|      |      |                                                                                   |                                                                                                                                                                                                                                                                                                                                                                                                                                                                                                                        |            |                                                                                                                                                                                                                                                                                                                                                                                                                                                                                                                                                                                                                                                                                                                                                                                                                                                                                                                                                                                                                                                                                                                                                                                                                                                                                                                                                                                                                                                                                                                    |       |
| 1.08 | 2.12 | phosphorus (no P for 10d; shoot) vs untreated shoot samples (sufficient Fe and P) | Shoot samples of cultivar Nipponbare germinated for 2 days in distilled water and then floated for 10 days on the Yoshida nutrient solution (Yoshida et al., 1976, Laboratory Manual for Physiological Studies of Rice, Ed 3. International Rice Research Institute, Manila, The Philippines) with optimal iron (0.036mM FeCl3) concentration but lacking phosphorus (NaH2PO4). Other growth conditions: growth chamber, 12h light (450 mmol photons m <sup>-2</sup> s <sup>-1</sup> ) at 30°C / 12h darkness at 22°C. | Nipponbare | Japonica ( <i>Oryza sativa</i> ssp. japonica) variety resistant to infection by the plant <i>Striga hermonthica</i> , an obligate root hemiparasite (Swarbrick et al., 2008, <i>New Phytol.</i> 179: 515-529). Nipponbare is susceptible to <i>Xanthomonas oryzae</i> pv. <i>oryzae</i> strains BAI3 (from Burkina Faso), PXO99A (from the Philippines; race 6), PXO86 (from the Philippines; race 2), T7174 (from Japan; race 1), and MAI1 (from Mali). Nipponbare is well transformable with <i>Agrobacterium tumefaciens</i> : using <i>A. tumefaciens</i> strain EHA 105, transient transformation frequency has been found to be 85.2%, stable transformation frequency 53.52% (Tie et al., 2012, <i>Plant Mol. Biol.</i> 78: 1-18). Nipponbare is susceptible to <i>Meloidogyne graminicola</i> , a root knot nematode that induces re-differentiation of root cells into multinucleate giant cells and formation of hook-like galls. Nipponbare is susceptible to <i>Magnaporthe oryzae</i> isolate FR13 (virulent isolate from France) and resistant to <i>M. oryzae</i> isolates CL3.6.7 (avirulent isolate) and BR32 (nonadapted isolate from Brazil) (Abbruscato et al., 2012, <i>Mol Plant Pathol.</i> ; Faivre-Rampant et al., 2008, <i>New Phytol.</i> 180: 899-910). This variety is sensitive to drought stress; drought index 0.54 (Wei et al., 2017, <i>Front Plant Sci.</i> 8: 473). Nipponbare is susceptible to Rice Stripe Virus (RSV) (Zhao et al., 2016, <i>New Phytol.</i> 210: 196-207). | shoot |

|  |  |  |                                                                            |                                                                                                                                                                                                                                                                                                                                                                                                                                                                                                                                                                             |            |                                                                                                                                                                                                                                                                                                                                                                                                                                                                                                                                                                                                                                                                                                                                                                                                                                                                                                                                                                                                                                                                                                                                                                                                                                                                                                                                                                                                                                                                                                                    |       |
|--|--|--|----------------------------------------------------------------------------|-----------------------------------------------------------------------------------------------------------------------------------------------------------------------------------------------------------------------------------------------------------------------------------------------------------------------------------------------------------------------------------------------------------------------------------------------------------------------------------------------------------------------------------------------------------------------------|------------|--------------------------------------------------------------------------------------------------------------------------------------------------------------------------------------------------------------------------------------------------------------------------------------------------------------------------------------------------------------------------------------------------------------------------------------------------------------------------------------------------------------------------------------------------------------------------------------------------------------------------------------------------------------------------------------------------------------------------------------------------------------------------------------------------------------------------------------------------------------------------------------------------------------------------------------------------------------------------------------------------------------------------------------------------------------------------------------------------------------------------------------------------------------------------------------------------------------------------------------------------------------------------------------------------------------------------------------------------------------------------------------------------------------------------------------------------------------------------------------------------------------------|-------|
|  |  |  | iron (no Fe for 10d; root) vs iron; phosphorus (no Fe and P for 10d; root) | Root samples of cultivar Nipponbare germinated for 2 days in distilled water and then floated for 10 days on the Yoshida nutrient solution (Yoshida et al., 1976, Laboratory Manual for Physiological Studies of Rice, Ed 3. International Rice Research Institute, Manila, The Philippines) with optimal phosphorus (0.323mM NaH <sub>2</sub> PO <sub>4</sub> ) concentration but lacking iron (FeCl <sub>3</sub> ) and citric acid. Other growth conditions: growth chamber, 12h light (450μmol photons m <sup>-2</sup> s <sup>-1</sup> ) at 30°C / 12h darkness at 22°C. | Nipponbare | Japonica ( <i>Oryza sativa</i> ssp. japonica) variety resistant to infection by the plant <i>Striga hermonthica</i> , an obligate root hemiparasite (Swarbrick et al., 2008, <i>New Phytol.</i> 179: 515-529). Nipponbare is susceptible to <i>Xanthomonas oryzae</i> pv. <i>oryzae</i> strains BAI3 (from Burkina Faso), PXO99A (from the Philippines; race 6), PXO86 (from the Philippines; race 2), T7174 (from Japan; race 1), and MAI1 (from Mali). Nipponbare is well transformable with <i>Agrobacterium tumefaciens</i> : using <i>A. tumefaciens</i> strain EHA 105, transient transformation frequency has been found to be 85.2%, stable transformation frequency 53.52% (Tie et al., 2012, <i>Plant Mol. Biol.</i> 78: 1-18). Nipponbare is susceptible to <i>Meloidogyne graminicola</i> , a root knot nematode that induces re-differentiation of root cells into multinucleate giant cells and formation of hook-like galls. Nipponbare is susceptible to <i>Magnaporthe oryzae</i> isolate FR13 (virulent isolate from France) and resistant to <i>M. oryzae</i> isolates CL3.6.7 (avirulent isolate) and BR32 (nonadapted isolate from Brazil) (Abbruscato et al., 2012, <i>Mol Plant Pathol.</i> ; Faivre-Rampant et al., 2008, <i>New Phytol.</i> 180: 899-910). This variety is sensitive to drought stress; drought index 0.54 (Wei et al., 2017, <i>Front Plant Sci.</i> 8: 473). Nipponbare is susceptible to Rice Stripe Virus (RSV) (Zhao et al., 2016, <i>New Phytol.</i> 210: 196-207). | roots |
|--|--|--|----------------------------------------------------------------------------|-----------------------------------------------------------------------------------------------------------------------------------------------------------------------------------------------------------------------------------------------------------------------------------------------------------------------------------------------------------------------------------------------------------------------------------------------------------------------------------------------------------------------------------------------------------------------------|------------|--------------------------------------------------------------------------------------------------------------------------------------------------------------------------------------------------------------------------------------------------------------------------------------------------------------------------------------------------------------------------------------------------------------------------------------------------------------------------------------------------------------------------------------------------------------------------------------------------------------------------------------------------------------------------------------------------------------------------------------------------------------------------------------------------------------------------------------------------------------------------------------------------------------------------------------------------------------------------------------------------------------------------------------------------------------------------------------------------------------------------------------------------------------------------------------------------------------------------------------------------------------------------------------------------------------------------------------------------------------------------------------------------------------------------------------------------------------------------------------------------------------------|-------|

qRPUpE1.5

|          |      |      |                                                                                                 |                                                                                                                                                                                                                                                                                                                                                                                                                                                                                                                                  |       |                                                                                                                                                                                                                                                                                                                                                                                                                                                                                                                                                                                                                                                                                                                                                                                                                                                                                                                                                                                                                       |       |
|----------|------|------|-------------------------------------------------------------------------------------------------|----------------------------------------------------------------------------------------------------------------------------------------------------------------------------------------------------------------------------------------------------------------------------------------------------------------------------------------------------------------------------------------------------------------------------------------------------------------------------------------------------------------------------------|-------|-----------------------------------------------------------------------------------------------------------------------------------------------------------------------------------------------------------------------------------------------------------------------------------------------------------------------------------------------------------------------------------------------------------------------------------------------------------------------------------------------------------------------------------------------------------------------------------------------------------------------------------------------------------------------------------------------------------------------------------------------------------------------------------------------------------------------------------------------------------------------------------------------------------------------------------------------------------------------------------------------------------------------|-------|
| OS-00239 | 1.04 | 2.12 | phosphorus (Dular; 320 $\mu$ M Pi; shoot) vs phosphorus (Pusa Basmati 1; 320 $\mu$ M Pi; shoot) | Shoot samples of 15-day-old Dular seedlings grown in a phosphate sufficient nutrient solution (320 $\mu$ M Pi); the solution (pH 5.5) was exchanged every 24h. Other growth conditions: growth chamber, 16h light (250-300 $\mu$ mol photons m <sup>-2</sup> s <sup>-1</sup> ) at 30°C / 8h darkness at 28°C cycles, 70% relative humidity. The nutrient solution as described in (Yoshida et al., 1976, Laboratory Manual for Physiological Studies of Rice, Ed 3, International Rice Research Institute, Manila, Philippines). | Dular | Traditional <i>Oryza sativa</i> ssp. indica variety with very low yield potential (7-22q/ha) and high tolerance to low phosphate (Pi) content in the soil. Dular is more efficient in Pi utilization and better preserves root growth under Pi-limiting conditions than a low Pi-sensitive variety, Pusa Basmati 1. When plants were grown under low Pi (1 $\mu$ M) for 15 days, Dular root length was 9.38 $\pm$ 0.17cm while Pusa Basmati 1 root length was 7.41 $\pm$ 0.15cm. Under low Pi, Dular produced more and longer lateral roots than Pusa Basmati 1. Even though under sufficient Pi root and shoot Pi content was lower in Dular than in Pusa Basmati 1, under low Pi root and shoot Pi content was higher in Dular than in Pusa Basmati 1 (Mehra et al., 2016, Front Plant Sci. 6: 1184). Dular belongs to wide-compatibility variety (WCV) rice germplasms, i.e. Dular is able to produce fertile hybrids when crossed to indica or japonica varieties (Wang et al., 1998, Theor Appl Genet. 97: 407). | shoot |
|----------|------|------|-------------------------------------------------------------------------------------------------|----------------------------------------------------------------------------------------------------------------------------------------------------------------------------------------------------------------------------------------------------------------------------------------------------------------------------------------------------------------------------------------------------------------------------------------------------------------------------------------------------------------------------------|-------|-----------------------------------------------------------------------------------------------------------------------------------------------------------------------------------------------------------------------------------------------------------------------------------------------------------------------------------------------------------------------------------------------------------------------------------------------------------------------------------------------------------------------------------------------------------------------------------------------------------------------------------------------------------------------------------------------------------------------------------------------------------------------------------------------------------------------------------------------------------------------------------------------------------------------------------------------------------------------------------------------------------------------|-------|



|  |  |      |     |                                                                                 |                                                                                                                                                                                                                                                                                                                                                                                                                                                                                                                                                          |            |                                                                                                                                                                                                                                                                                                                                                                                                                                                                                                                                                                                                                                                                                                                                                                                                                                                                                                                                                                                                                                                                                                                                                                                                                                                                                                                                                                                                                                                                                                                      |       |
|--|--|------|-----|---------------------------------------------------------------------------------|----------------------------------------------------------------------------------------------------------------------------------------------------------------------------------------------------------------------------------------------------------------------------------------------------------------------------------------------------------------------------------------------------------------------------------------------------------------------------------------------------------------------------------------------------------|------------|----------------------------------------------------------------------------------------------------------------------------------------------------------------------------------------------------------------------------------------------------------------------------------------------------------------------------------------------------------------------------------------------------------------------------------------------------------------------------------------------------------------------------------------------------------------------------------------------------------------------------------------------------------------------------------------------------------------------------------------------------------------------------------------------------------------------------------------------------------------------------------------------------------------------------------------------------------------------------------------------------------------------------------------------------------------------------------------------------------------------------------------------------------------------------------------------------------------------------------------------------------------------------------------------------------------------------------------------------------------------------------------------------------------------------------------------------------------------------------------------------------------------|-------|
|  |  | 1.73 | 3.3 | phosphorus (no P for 10d; root) vs untreated root samples (sufficient Fe and P) | <p>Root samples of cultivar Nipponbare germinated for 2 days in distilled water and then floated for 10 days on the Yoshida nutrient solution (Yoshida et al., 1976, Laboratory Manual for Physiological Studies of Rice, Ed 3. International Rice Research Institute, Manila, The Philippines) with optimal iron (0.036mM FeCl<sub>3</sub>) concentration but lacking phosphorus (NaH<sub>2</sub>PO<sub>4</sub>). Other growth conditions: growth chamber, 12h light (450μmol photons m<sup>-2</sup>s<sup>-1</sup>) at 30°C / 12h darkness at 22°C.</p> | Nipponbare | <p>Japonica (<i>Oryza sativa</i> ssp. japonica) variety resistant to infection by the plant <i>Striga hermonthica</i>, an obligate root hemiparasite (Swarbrick et al., 2008, <i>New Phytol.</i> 179: 515-529). Nipponbare is susceptible to <i>Xanthomonas oryzae</i> pv. <i>oryzae</i> strains BAI3 (from Burkina Faso), PXO99A (from the Philippines; race 6), PXO86 (from the Philippines; race 2), T7174 (from Japan; race 1), and MAI1 (from Mali). Nipponbare is well transformable with <i>Agrobacterium tumefaciens</i>: using <i>A. tumefaciens</i> strain EHA 105, transient transformation frequency has been found to be 85.2%, stable transformation frequency 53.52% (Tie et al., 2012, <i>Plant Mol. Biol.</i> 78: 1-18). Nipponbare is susceptible to <i>Meloidogyne graminicola</i>, a root knot nematode that induces re-differentiation of root cells into multinucleate giant cells and formation of hook-like galls. Nipponbare is susceptible to <i>Magnaporthe oryzae</i> isolate FR13 (virulent isolate from France) and resistant to <i>M. oryzae</i> isolates CL3.6.7 (avirulent isolate) and BR32 (nonadapted isolate from Brazil) (Abbruscato et al., 2012, <i>Mol Plant Pathol.</i>; Faivre-Rampant et al., 2008, <i>New Phytol.</i> 180: 899-910). This variety is sensitive to drought stress; drought index 0.54 (Wei et al., 2017, <i>Front Plant Sci.</i> 8: 473). Nipponbare is susceptible to Rice Stripe Virus (RSV) (Zhao et al., 2016, <i>New Phytol.</i> 210: 196-207).</p> | roots |
|--|--|------|-----|---------------------------------------------------------------------------------|----------------------------------------------------------------------------------------------------------------------------------------------------------------------------------------------------------------------------------------------------------------------------------------------------------------------------------------------------------------------------------------------------------------------------------------------------------------------------------------------------------------------------------------------------------|------------|----------------------------------------------------------------------------------------------------------------------------------------------------------------------------------------------------------------------------------------------------------------------------------------------------------------------------------------------------------------------------------------------------------------------------------------------------------------------------------------------------------------------------------------------------------------------------------------------------------------------------------------------------------------------------------------------------------------------------------------------------------------------------------------------------------------------------------------------------------------------------------------------------------------------------------------------------------------------------------------------------------------------------------------------------------------------------------------------------------------------------------------------------------------------------------------------------------------------------------------------------------------------------------------------------------------------------------------------------------------------------------------------------------------------------------------------------------------------------------------------------------------------|-------|

|          |      |                                                                                    |                                                                                                                                                                                                                                                                                                                                                                                                                                                                                                                                                                             |            |                                                                                                                                                                                                                                                                                                                                                                                                                                                                                                                                                                                                                                                                                                                                                                                                                                                                                                                                                                                                                                                                                                                                                                                                                                                                                                                                                                                                                                                                                                                    |       |
|----------|------|------------------------------------------------------------------------------------|-----------------------------------------------------------------------------------------------------------------------------------------------------------------------------------------------------------------------------------------------------------------------------------------------------------------------------------------------------------------------------------------------------------------------------------------------------------------------------------------------------------------------------------------------------------------------------|------------|--------------------------------------------------------------------------------------------------------------------------------------------------------------------------------------------------------------------------------------------------------------------------------------------------------------------------------------------------------------------------------------------------------------------------------------------------------------------------------------------------------------------------------------------------------------------------------------------------------------------------------------------------------------------------------------------------------------------------------------------------------------------------------------------------------------------------------------------------------------------------------------------------------------------------------------------------------------------------------------------------------------------------------------------------------------------------------------------------------------------------------------------------------------------------------------------------------------------------------------------------------------------------------------------------------------------------------------------------------------------------------------------------------------------------------------------------------------------------------------------------------------------|-------|
| OS-00036 | 1.55 | 2.93<br>iron (no Fe for 10d; root) vs untreated root samples (sufficient Fe and P) | Root samples of cultivar Nipponbare germinated for 2 days in distilled water and then floated for 10 days on the Yoshida nutrient solution (Yoshida et al., 1976, Laboratory Manual for Physiological Studies of Rice, Ed 3. International Rice Research Institute, Manila, The Philippines) with optimal phosphorus (0.323mM NaH <sub>2</sub> PO <sub>4</sub> ) concentration but lacking iron (FeCl <sub>3</sub> ) and citric acid. Other growth conditions: growth chamber, 12h light (450μmol photons m <sup>-2</sup> s <sup>-1</sup> ) at 30°C / 12h darkness at 22°C. | Nipponbare | Japonica ( <i>Oryza sativa</i> ssp. japonica) variety resistant to infection by the plant <i>Striga hermonthica</i> , an obligate root hemiparasite (Swarbrick et al., 2008, <i>New Phytol.</i> 179: 515-529). Nipponbare is susceptible to <i>Xanthomonas oryzae</i> pv. <i>oryzae</i> strains BAI3 (from Burkina Faso), PXO99A (from the Philippines; race 6), PXO86 (from the Philippines; race 2), T7174 (from Japan; race 1), and MAI1 (from Mali). Nipponbare is well transformable with <i>Agrobacterium tumefaciens</i> : using <i>A. tumefaciens</i> strain EHA 105, transient transformation frequency has been found to be 85.2%, stable transformation frequency 53.52% (Tie et al., 2012, <i>Plant Mol. Biol.</i> 78: 1-18). Nipponbare is susceptible to <i>Meloidogyne graminicola</i> , a root knot nematode that induces re-differentiation of root cells into multinucleate giant cells and formation of hook-like galls. Nipponbare is susceptible to <i>Magnaporthe oryzae</i> isolate FR13 (virulent isolate from France) and resistant to <i>M. oryzae</i> isolates CL3.6.7 (avirulent isolate) and BR32 (nonadapted isolate from Brazil) (Abbruscato et al., 2012, <i>Mol Plant Pathol.</i> ; Faivre-Rampant et al., 2008, <i>New Phytol.</i> 180: 899-910). This variety is sensitive to drought stress; drought index 0.54 (Wei et al., 2017, <i>Front Plant Sci.</i> 8: 473). Nipponbare is susceptible to Rice Stripe Virus (RSV) (Zhao et al., 2016, <i>New Phytol.</i> 210: 196-207). | roots |
|----------|------|------------------------------------------------------------------------------------|-----------------------------------------------------------------------------------------------------------------------------------------------------------------------------------------------------------------------------------------------------------------------------------------------------------------------------------------------------------------------------------------------------------------------------------------------------------------------------------------------------------------------------------------------------------------------------|------------|--------------------------------------------------------------------------------------------------------------------------------------------------------------------------------------------------------------------------------------------------------------------------------------------------------------------------------------------------------------------------------------------------------------------------------------------------------------------------------------------------------------------------------------------------------------------------------------------------------------------------------------------------------------------------------------------------------------------------------------------------------------------------------------------------------------------------------------------------------------------------------------------------------------------------------------------------------------------------------------------------------------------------------------------------------------------------------------------------------------------------------------------------------------------------------------------------------------------------------------------------------------------------------------------------------------------------------------------------------------------------------------------------------------------------------------------------------------------------------------------------------------------|-------|

|  |      |      |                                                                                                                         |                                                                                                                                                                                                                                                                                                                                                                                                                                                                                                                          |            |                                                                                                                                                                                                                                                                                                                                                                                                                                                                                                                                                                                                                                                                                                                                                                                                                                                                                                                                                                                                                                                                                                                                                                                                                                                                                                                                                                                                                                                                                                                    |       |
|--|------|------|-------------------------------------------------------------------------------------------------------------------------|--------------------------------------------------------------------------------------------------------------------------------------------------------------------------------------------------------------------------------------------------------------------------------------------------------------------------------------------------------------------------------------------------------------------------------------------------------------------------------------------------------------------------|------------|--------------------------------------------------------------------------------------------------------------------------------------------------------------------------------------------------------------------------------------------------------------------------------------------------------------------------------------------------------------------------------------------------------------------------------------------------------------------------------------------------------------------------------------------------------------------------------------------------------------------------------------------------------------------------------------------------------------------------------------------------------------------------------------------------------------------------------------------------------------------------------------------------------------------------------------------------------------------------------------------------------------------------------------------------------------------------------------------------------------------------------------------------------------------------------------------------------------------------------------------------------------------------------------------------------------------------------------------------------------------------------------------------------------------------------------------------------------------------------------------------------------------|-------|
|  | 1.22 | 2.33 | iron;<br>phosphorus<br>(no Fe and P<br>for 10d;<br>root) vs<br>untreated<br>root<br>samples<br>(sufficient<br>Fe and P) | Root samples of cultivar Nipponbare germinated for 2 days in distilled water and then floated for 10 days on the Yoshida nutrient solution (Yoshida et al., 1976, Laboratory Manual for Physiological Studies of Rice, Ed 3. International Rice Research Institute, Manila, The Philippines) lacking iron (FeCl <sub>3</sub> ) and phosphorus (NaH <sub>2</sub> PO <sub>4</sub> ). Other growth conditions: growth chamber, 12h light (450μmol photons m <sup>-2</sup> s <sup>-1</sup> ) at 30°C / 12h darkness at 22°C. | Nipponbare | Japonica ( <i>Oryza sativa</i> ssp. japonica) variety resistant to infection by the plant <i>Striga hermonthica</i> , an obligate root hemiparasite (Swarbrick et al., 2008, <i>New Phytol.</i> 179: 515-529). Nipponbare is susceptible to <i>Xanthomonas oryzae</i> pv. <i>oryzae</i> strains BAI3 (from Burkina Faso), PXO99A (from the Philippines; race 6), PXO86 (from the Philippines; race 2), T7174 (from Japan; race 1), and MAI1 (from Mali). Nipponbare is well transformable with <i>Agrobacterium tumefaciens</i> : using <i>A. tumefaciens</i> strain EHA 105, transient transformation frequency has been found to be 85.2%, stable transformation frequency 53.52% (Tie et al., 2012, <i>Plant Mol. Biol.</i> 78: 1-18). Nipponbare is susceptible to <i>Meloidogyne graminicola</i> , a root knot nematode that induces re-differentiation of root cells into multinucleate giant cells and formation of hook-like galls. Nipponbare is susceptible to <i>Magnaporthe oryzae</i> isolate FR13 (virulent isolate from France) and resistant to <i>M. oryzae</i> isolates CL3.6.7 (avirulent isolate) and BR32 (nonadapted isolate from Brazil) (Abbruscato et al., 2012, <i>Mol Plant Pathol.</i> ; Faivre-Rampant et al., 2008, <i>New Phytol.</i> 180: 899-910). This variety is sensitive to drought stress; drought index 0.54 (Wei et al., 2017, <i>Front Plant Sci.</i> 8: 473). Nipponbare is susceptible to Rice Stripe Virus (RSV) (Zhao et al., 2016, <i>New Phytol.</i> 210: 196-207). | roots |
|--|------|------|-------------------------------------------------------------------------------------------------------------------------|--------------------------------------------------------------------------------------------------------------------------------------------------------------------------------------------------------------------------------------------------------------------------------------------------------------------------------------------------------------------------------------------------------------------------------------------------------------------------------------------------------------------------|------------|--------------------------------------------------------------------------------------------------------------------------------------------------------------------------------------------------------------------------------------------------------------------------------------------------------------------------------------------------------------------------------------------------------------------------------------------------------------------------------------------------------------------------------------------------------------------------------------------------------------------------------------------------------------------------------------------------------------------------------------------------------------------------------------------------------------------------------------------------------------------------------------------------------------------------------------------------------------------------------------------------------------------------------------------------------------------------------------------------------------------------------------------------------------------------------------------------------------------------------------------------------------------------------------------------------------------------------------------------------------------------------------------------------------------------------------------------------------------------------------------------------------------|-------|

LOC\_Os01g66110.1

|          |       |       |                                                                                               |                                                                                                                                                                                                                                                                                                                                                                                                                                                      |                  |                                                                                                                                                                                                                                                                                                                                                                                                                                                                                                                                                                                                                                                                                                                                                                                                                                                                                                                                                                                                                                                                                                                                                                                                                                                   |       |
|----------|-------|-------|-----------------------------------------------------------------------------------------------|------------------------------------------------------------------------------------------------------------------------------------------------------------------------------------------------------------------------------------------------------------------------------------------------------------------------------------------------------------------------------------------------------------------------------------------------------|------------------|---------------------------------------------------------------------------------------------------------------------------------------------------------------------------------------------------------------------------------------------------------------------------------------------------------------------------------------------------------------------------------------------------------------------------------------------------------------------------------------------------------------------------------------------------------------------------------------------------------------------------------------------------------------------------------------------------------------------------------------------------------------------------------------------------------------------------------------------------------------------------------------------------------------------------------------------------------------------------------------------------------------------------------------------------------------------------------------------------------------------------------------------------------------------------------------------------------------------------------------------------|-------|
| OS-00282 | -1.47 | -2.76 | phosphorus (phr1/2/3; -Pi for 7d) vs phosphorus (phr3; -Pi for 7d)                            | Shoot samples of phr1/2/3 plants grown hydroponically for 14 days in a nutrient solution (pH 5.5; Zhou et al., 2008, Plant Physiol. 146: 1673-1686) containing 200µM NaH <sub>2</sub> PO <sub>4</sub> (sufficient phosphate) and then transferred for 7 days into a solution lacking phosphate. Other conditions: greenhouse, 12h light (200µmol photons m <sup>-2</sup> s <sup>-1</sup> ) at 30°C / 12h dark at 22°C cycles, 60% relative humidity. | phr1/2/3         | Triple mutant (Nipponbare genetic background) with following mutations in OsPHR1, OsPHR2, OsPHR3 (PHOSPHATE STARVATION RESPONSE1, 2, 3): phr1, a 2bp deletion in the first translated exon of OsPHR1 (LOC_Os03g21240) resulting in a frameshift and a premature translation stop codon; phr2, a T-DNA insertion in OsPHR2 (LOC_Os07g25710); phr3, a Tos-17 retrotransposon insertion in the seventh translated exon of OsPHR3 (LOC_Os02g04640). The triple mutant was obtained by crossing single homozygous phr1, phr2 and phr3 mutants. OsPHR1, OsPHR2 and OsPHR3 are functionally redundant transcription factors involved in phosphate (Pi) signaling. Irrespective of Pi supply (low or sufficient), Pi concentration in phr1/2/3 shoots was lower than in shoots of Nipponbare wild type. Pi concentration in phr1/2/3 roots was only slightly lower than Pi concentration in wild type roots. Root and shoot biomass of phr1/2/3 was reduced compared to the wild type under both low Pi and sufficient Pi. Under Pi deficient conditions, root hairs of phr1/2/3 were much shorter than root hairs of the wild type (root hair length: phr1/2/3, approx. 40µm; wild type, approx. 175µm) (Guo et al., 2015, Plant Physiol. 168: 1762-76). | shoot |
| OS-00096 | -1.48 | -2.81 | phosphorus (35S::PSTOL1 (20); no P fertilizer) vs phosphorus (35S::PSTOL1 (20); 60kg/ha P2O5) | Root samples of 35S::PSTOL1 (20) line grown till the heading stage on phosphorus-deficient soil from Siniloan, Luzon, the Philippines (P-Bray, 1.23 ± 0.30mgkg <sup>-1</sup> ; P-Olsen, 0.77 ± 0.46 mgkg <sup>-1</sup> ) under dry-down conditions.                                                                                                                                                                                                  | 35S::PSTOL1 (20) | Phosphorus-starvation-tolerant transgenic line 20 (cv. IR64 background) carrying full-length coding region (CDS) of PSTOL1 under control of the constitutive CaMV35S promoter and NOS terminator. The PSTOL1 CDS is derived from O. sativa indica cultivar Kasalath. PSTOL1 (Phosphorus-starvation tolerance 1; OsPupK46-2) encodes a functional serine/threonine protein kinase and is absent in genomes of phosphorus-starvation-intolerant rice varieties such as IR64, Nipponbare. 35S::PSTOL1 (20) plants grown on phosphorus-unfertilized soil have larger root system and produce approx. 60% more seeds than the control IR64-null plants (segregants without the transgene). Compared to the non-transgenic IR64-null control, total root length and surface area of 35S::PSTOL1 (20) plants is increased not only under low-phosphorus but also under phosphorus-sufficient conditions (Gamuyao et al., 2012, Nature 488: 535-539).                                                                                                                                                                                                                                                                                                     | roots |

|          |       |       |                                                                          |                                                                                                                                                                                                                                                                                                                                                                                                                                                      |          |                                                                                                                                                                                                                                                                                                                                                                                                                                                                                                                                                                                                                                                                                                                                                                                                                                                                                                                                                                                                                                                                                                                                                                                                                                                   |       |
|----------|-------|-------|--------------------------------------------------------------------------|------------------------------------------------------------------------------------------------------------------------------------------------------------------------------------------------------------------------------------------------------------------------------------------------------------------------------------------------------------------------------------------------------------------------------------------------------|----------|---------------------------------------------------------------------------------------------------------------------------------------------------------------------------------------------------------------------------------------------------------------------------------------------------------------------------------------------------------------------------------------------------------------------------------------------------------------------------------------------------------------------------------------------------------------------------------------------------------------------------------------------------------------------------------------------------------------------------------------------------------------------------------------------------------------------------------------------------------------------------------------------------------------------------------------------------------------------------------------------------------------------------------------------------------------------------------------------------------------------------------------------------------------------------------------------------------------------------------------------------|-------|
| OS-00282 | -1.69 | -3.24 | phosphorus (phr1/2/3; -Pi for 7d)<br>phosphorus (Nipponbare; -Pi for 7d) | Shoot samples of phr1/2/3 plants grown hydroponically for 14 days in a nutrient solution (pH 5.5; Zhou et al., 2008, Plant Physiol. 146: 1673-1686) containing 200µM NaH <sub>2</sub> PO <sub>4</sub> (sufficient phosphate) and then transferred for 7 days into a solution lacking phosphate. Other conditions: greenhouse, 12h light (200µmol photons m <sup>-2</sup> s <sup>-1</sup> ) at 30°C / 12h dark at 22°C cycles, 60% relative humidity. | phr1/2/3 | Triple mutant (Nipponbare genetic background) with following mutations in OsPHR1, OsPHR2, OsPHR3 (PHOSPHATE STARVATION RESPONSE1, 2, 3): phr1, a 2bp deletion in the first translated exon of OsPHR1 (LOC_Os03g21240) resulting in a frameshift and a premature translation stop codon; phr2, a T-DNA insertion in OsPHR2 (LOC_Os07g25710); phr3, a Tos-17 retrotransposon insertion in the seventh translated exon of OsPHR3 (LOC_Os02g04640). The triple mutant was obtained by crossing single homozygous phr1, phr2 and phr3 mutants. OsPHR1, OsPHR2 and OsPHR3 are functionally redundant transcription factors involved in phosphate (Pi) signaling. Irrespective of Pi supply (low or sufficient), Pi concentration in phr1/2/3 shoots was lower than in shoots of Nipponbare wild type. Pi concentration in phr1/2/3 roots was only slightly lower than Pi concentration in wild type roots. Root and shoot biomass of phr1/2/3 was reduced compared to the wild type under both low Pi and sufficient Pi. Under Pi deficient conditions, root hairs of phr1/2/3 were much shorter than root hairs of the wild type (root hair length: phr1/2/3, approx. 40µm; wild type, approx. 175µm) (Guo et al., 2015, Plant Physiol. 168: 1762-76). | shoot |
| OS-00282 | -1.77 | -3.41 | phosphorus (phr1/2/3; -Pi for 7d) vs phosphorus (phr1; -Pi for 7d)       | Shoot samples of phr1/2/3 plants grown hydroponically for 14 days in a nutrient solution (pH 5.5; Zhou et al., 2008, Plant Physiol. 146: 1673-1686) containing 200µM NaH <sub>2</sub> PO <sub>4</sub> (sufficient phosphate) and then transferred for 7 days into a solution lacking phosphate. Other conditions: greenhouse, 12h light (200µmol photons m <sup>-2</sup> s <sup>-1</sup> ) at 30°C / 12h dark at 22°C cycles, 60% relative humidity. | phr1/2/3 | Triple mutant (Nipponbare genetic background) with following mutations in OsPHR1, OsPHR2, OsPHR3 (PHOSPHATE STARVATION RESPONSE1, 2, 3): phr1, a 2bp deletion in the first translated exon of OsPHR1 (LOC_Os03g21240) resulting in a frameshift and a premature translation stop codon; phr2, a T-DNA insertion in OsPHR2 (LOC_Os07g25710); phr3, a Tos-17 retrotransposon insertion in the seventh translated exon of OsPHR3 (LOC_Os02g04640). The triple mutant was obtained by crossing single homozygous phr1, phr2 and phr3 mutants. OsPHR1, OsPHR2 and OsPHR3 are functionally redundant transcription factors involved in phosphate (Pi) signaling. Irrespective of Pi supply (low or sufficient), Pi concentration in phr1/2/3 shoots was lower than in shoots of Nipponbare wild type. Pi concentration in phr1/2/3 roots was only slightly lower than Pi concentration in wild type roots. Root and shoot biomass of phr1/2/3 was reduced compared to the wild type under both low Pi and sufficient Pi. Under Pi deficient conditions, root hairs of phr1/2/3 were much shorter than root hairs of the wild type (root hair length: phr1/2/3, approx. 40µm; wild type, approx. 175µm) (Guo et al., 2015, Plant Physiol. 168: 1762-76). | shoot |

|                  |          |       |       |                                                                               |                                                                                                                                                                                                                                                                                                                                                                                                                                                                                                                  |       |                                                                                                                                                                                                                                                                                                                                                                                                                                                                                                                                                                                                                                                                                                                                                                                                                                                                                                                                                                                                        |       |
|------------------|----------|-------|-------|-------------------------------------------------------------------------------|------------------------------------------------------------------------------------------------------------------------------------------------------------------------------------------------------------------------------------------------------------------------------------------------------------------------------------------------------------------------------------------------------------------------------------------------------------------------------------------------------------------|-------|--------------------------------------------------------------------------------------------------------------------------------------------------------------------------------------------------------------------------------------------------------------------------------------------------------------------------------------------------------------------------------------------------------------------------------------------------------------------------------------------------------------------------------------------------------------------------------------------------------------------------------------------------------------------------------------------------------------------------------------------------------------------------------------------------------------------------------------------------------------------------------------------------------------------------------------------------------------------------------------------------------|-------|
| LOC_Os01g73880.1 |          |       |       |                                                                               |                                                                                                                                                                                                                                                                                                                                                                                                                                                                                                                  |       |                                                                                                                                                                                                                                                                                                                                                                                                                                                                                                                                                                                                                                                                                                                                                                                                                                                                                                                                                                                                        |       |
| LOC_Os01g73890.1 | OS-00003 | 1.35  | 2.56  | arsenate (Bala) vs untreated root samples (Bala)                              | Root samples of rice variety Bala grown for 7 days in hydroponics on phosphate-free nutrient solution containing 0.1mM Mg <sup>2+</sup> and SO <sub>4</sub> <sup>2-</sup> , 0.2mM Ca <sup>2+</sup> and K <sup>+</sup> , 0.6mM NO <sub>3</sub> <sup>-</sup> , and 1ppm (13.3μM) arsenate (Na <sub>2</sub> HAsO <sub>4</sub> ).                                                                                                                                                                                    | Bala  | Improved indica upland cultivar; origin: Eastern India.                                                                                                                                                                                                                                                                                                                                                                                                                                                                                                                                                                                                                                                                                                                                                                                                                                                                                                                                                | roots |
|                  | OS-00239 | -1.06 | -2.08 | phosphorus (Dular; 1μM Pi; root) vs phosphorus (Pusa Basmati 1; 1μM Pi; root) | Root samples of 15-day-old Dular seedlings grown in a phosphate deficient nutrient solution (1μM Pi); the solution (pH 5.5) was exchanged every 24h. Other growth conditions: growth chamber, 16h light (250-300μmol photons m <sup>-2</sup> s <sup>-1</sup> ) at 30°C / 8h darkness at 28°C cycles, 70% relative humidity. The nutrient solution as described in (Yoshida et al., 1976, Laboratory Manual for Physiological Studies of Rice, Ed 3, International Rice Research Institute, Manila, Philippines). | Dular | Traditional <i>Oryza sativa</i> ssp. indica variety with very low yield potential (7-22q/ha) and high tolerance to low phosphate (Pi) content in the soil. Dular is more efficient in Pi utilization and better preserves root growth under Pi-limiting conditions than a low Pi-sensitive variety, Pusa Basmati 1. When plants were grown under low Pi (1μM) for 15 days, Dular root length was 9.38 ± 0.17cm while Pusa Basmati 1 root length was 7.41 ± 0.15cm. Under low Pi, Dular produced more and longer lateral roots than Pusa Basmati 1. Even though under sufficient Pi root and shoot Pi content was lower in Dular than in Pusa Basmati 1, under low Pi root and shoot Pi content was higher in Dular than in Pusa Basmati 1 (Mehra et al., 2016, Front Plant Sci. 6: 1184). Dular belongs to wide-compatibility variety (WCV) rice germplasm, i.e. Dular is able to produce fertile hybrids when crossed to indica or japonica varieties (Wang et al., 1998, Theor Appl Genet. 97: 407). | roots |

|                  |          |       |       |                                                                            |                                                                                                                                                                                                                                                                                                                                                                                                                                                                                                                                                                             |            |                                                                                                                                                                                                                                                                                                                                                                                                                                                                                                                                                                                                                                                                                                                                                                                                                                                                                                                                                                                                                                                                                                                                                                                                                                                                                                                                                                                                                                                                                                                    |       |
|------------------|----------|-------|-------|----------------------------------------------------------------------------|-----------------------------------------------------------------------------------------------------------------------------------------------------------------------------------------------------------------------------------------------------------------------------------------------------------------------------------------------------------------------------------------------------------------------------------------------------------------------------------------------------------------------------------------------------------------------------|------------|--------------------------------------------------------------------------------------------------------------------------------------------------------------------------------------------------------------------------------------------------------------------------------------------------------------------------------------------------------------------------------------------------------------------------------------------------------------------------------------------------------------------------------------------------------------------------------------------------------------------------------------------------------------------------------------------------------------------------------------------------------------------------------------------------------------------------------------------------------------------------------------------------------------------------------------------------------------------------------------------------------------------------------------------------------------------------------------------------------------------------------------------------------------------------------------------------------------------------------------------------------------------------------------------------------------------------------------------------------------------------------------------------------------------------------------------------------------------------------------------------------------------|-------|
| LOC_Os01g73900.1 | OS-00036 | -1.74 | -3.34 | iron (no Fe for 10d; root) vs iron; phosphorus (no Fe and P for 10d; root) | Root samples of cultivar Nipponbare germinated for 2 days in distilled water and then floated for 10 days on the Yoshida nutrient solution (Yoshida et al., 1976, Laboratory Manual for Physiological Studies of Rice, Ed 3. International Rice Research Institute, Manila, The Philippines) with optimal phosphorus (0.323mM NaH <sub>2</sub> PO <sub>4</sub> ) concentration but lacking iron (FeCl <sub>3</sub> ) and citric acid. Other growth conditions: growth chamber, 12h light (450μmol photons m <sup>-2</sup> s <sup>-1</sup> ) at 30°C / 12h darkness at 22°C. | Nipponbare | Japonica ( <i>Oryza sativa</i> ssp. japonica) variety resistant to infection by the plant <i>Striga hermonthica</i> , an obligate root hemiparasite (Swarbrick et al., 2008, <i>New Phytol.</i> 179: 515-529). Nipponbare is susceptible to <i>Xanthomonas oryzae</i> pv. <i>oryzae</i> strains BAI3 (from Burkina Faso), PXO99A (from the Philippines; race 6), PXO86 (from the Philippines; race 2), T7174 (from Japan; race 1), and MAI1 (from Mali). Nipponbare is well transformable with <i>Agrobacterium tumefaciens</i> : using <i>A. tumefaciens</i> strain EHA 105, transient transformation frequency has been found to be 85.2%, stable transformation frequency 53.52% (Tie et al., 2012, <i>Plant Mol. Biol.</i> 78: 1-18). Nipponbare is susceptible to <i>Meloidogyne graminicola</i> , a root knot nematode that induces re-differentiation of root cells into multinucleate giant cells and formation of hook-like galls. Nipponbare is susceptible to <i>Magnaporthe oryzae</i> isolate FR13 (virulent isolate from France) and resistant to <i>M. oryzae</i> isolates CL3.6.7 (avirulent isolate) and BR32 (nonadapted isolate from Brazil) (Abbruscato et al., 2012, <i>Mol Plant Pathol.</i> ; Faivre-Rampant et al., 2008, <i>New Phytol.</i> 180: 899-910). This variety is sensitive to drought stress; drought index 0.54 (Wei et al., 2017, <i>Front Plant Sci.</i> 8: 473). Nipponbare is susceptible to Rice Stripe Virus (RSV) (Zhao et al., 2016, <i>New Phytol.</i> 210: 196-207). | roots |
|------------------|----------|-------|-------|----------------------------------------------------------------------------|-----------------------------------------------------------------------------------------------------------------------------------------------------------------------------------------------------------------------------------------------------------------------------------------------------------------------------------------------------------------------------------------------------------------------------------------------------------------------------------------------------------------------------------------------------------------------------|------------|--------------------------------------------------------------------------------------------------------------------------------------------------------------------------------------------------------------------------------------------------------------------------------------------------------------------------------------------------------------------------------------------------------------------------------------------------------------------------------------------------------------------------------------------------------------------------------------------------------------------------------------------------------------------------------------------------------------------------------------------------------------------------------------------------------------------------------------------------------------------------------------------------------------------------------------------------------------------------------------------------------------------------------------------------------------------------------------------------------------------------------------------------------------------------------------------------------------------------------------------------------------------------------------------------------------------------------------------------------------------------------------------------------------------------------------------------------------------------------------------------------------------|-------|

qRPUpE1.6

|                  |          |  |    |                                                                                          |                                                                                                                                                                                                                                                                                                                                                                                                                                                                                                                      |            |                                                                                                                                                                                                                                                                                                                                                                                                                                                                                                                                                                                                                                                                                                                                                                                                                                                                                                                                                                                                                                                                                                                                                                                                                                                                                                                                                                                                                                                                                                                    |       |
|------------------|----------|--|----|------------------------------------------------------------------------------------------|----------------------------------------------------------------------------------------------------------------------------------------------------------------------------------------------------------------------------------------------------------------------------------------------------------------------------------------------------------------------------------------------------------------------------------------------------------------------------------------------------------------------|------------|--------------------------------------------------------------------------------------------------------------------------------------------------------------------------------------------------------------------------------------------------------------------------------------------------------------------------------------------------------------------------------------------------------------------------------------------------------------------------------------------------------------------------------------------------------------------------------------------------------------------------------------------------------------------------------------------------------------------------------------------------------------------------------------------------------------------------------------------------------------------------------------------------------------------------------------------------------------------------------------------------------------------------------------------------------------------------------------------------------------------------------------------------------------------------------------------------------------------------------------------------------------------------------------------------------------------------------------------------------------------------------------------------------------------------------------------------------------------------------------------------------------------|-------|
| LOC 0:01a73910.1 | OS-00036 |  | -1 | -2.01<br>phosphorus (no P for 10d; root) vs untreated root samples (sufficient Fe and P) | Root samples of cultivar Nipponbare germinated for 2 days in distilled water and then floated for 10 days on the Yoshida nutrient solution (Yoshida et al., 1976, Laboratory Manual for Physiological Studies of Rice, Ed 3. International Rice Research Institute, Manila, The Philippines) with optimal iron (0.036mM FeCl3) concentration but lacking phosphorus (NaH2PO4). Other growth conditions: growth chamber, 12h light (450µmol photons m <sup>-2</sup> s <sup>-1</sup> ) at 30°C / 12h darkness at 22°C. | Nipponbare | Japonica ( <i>Oryza sativa</i> ssp. japonica) variety resistant to infection by the plant <i>Striga hermonthica</i> , an obligate root hemiparasite (Swarbrick et al., 2008, <i>New Phytol.</i> 179: 515-529). Nipponbare is susceptible to <i>Xanthomonas oryzae</i> pv. <i>oryzae</i> strains BAI3 (from Burkina Faso), PXO99A (from the Philippines; race 6), PXO86 (from the Philippines; race 2), T7174 (from Japan; race 1), and MAI1 (from Mali). Nipponbare is well transformable with <i>Agrobacterium tumefaciens</i> : using <i>A. tumefaciens</i> strain EHA 105, transient transformation frequency has been found to be 85.2%, stable transformation frequency 53.52% (Tie et al., 2012, <i>Plant Mol. Biol.</i> 78: 1-18). Nipponbare is susceptible to <i>Meloidogyne graminicola</i> , a root knot nematode that induces re-differentiation of root cells into multinucleate giant cells and formation of hook-like galls. Nipponbare is susceptible to <i>Magnaporthe oryzae</i> isolate FR13 (virulent isolate from France) and resistant to <i>M. oryzae</i> isolates CL3.6.7 (avirulent isolate) and BR32 (nonadapted isolate from Brazil) (Abbruscato et al., 2012, <i>Mol Plant Pathol.</i> ; Faivre-Rampant et al., 2008, <i>New Phytol.</i> 180: 899-910). This variety is sensitive to drought stress; drought index 0.54 (Wei et al., 2017, <i>Front Plant Sci.</i> 8: 473). Nipponbare is susceptible to Rice Stripe Virus (RSV) (Zhao et al., 2016, <i>New Phytol.</i> 210: 196-207). | roots |
|------------------|----------|--|----|------------------------------------------------------------------------------------------|----------------------------------------------------------------------------------------------------------------------------------------------------------------------------------------------------------------------------------------------------------------------------------------------------------------------------------------------------------------------------------------------------------------------------------------------------------------------------------------------------------------------|------------|--------------------------------------------------------------------------------------------------------------------------------------------------------------------------------------------------------------------------------------------------------------------------------------------------------------------------------------------------------------------------------------------------------------------------------------------------------------------------------------------------------------------------------------------------------------------------------------------------------------------------------------------------------------------------------------------------------------------------------------------------------------------------------------------------------------------------------------------------------------------------------------------------------------------------------------------------------------------------------------------------------------------------------------------------------------------------------------------------------------------------------------------------------------------------------------------------------------------------------------------------------------------------------------------------------------------------------------------------------------------------------------------------------------------------------------------------------------------------------------------------------------------|-------|



|                  |          |      |       |                                                                                 |                                                                                                                                                                                                                                                                                                                                                                                                                                                                                                                      |            |                                                                                                                                                                                                                                                                                                                                                                                                                                                                                                                                                                                                                                                                                                                                                                                                                                                                                                                                                                                                                                                                                                                                                                                                                                                                                                                                                                                                                                                                         |       |
|------------------|----------|------|-------|---------------------------------------------------------------------------------|----------------------------------------------------------------------------------------------------------------------------------------------------------------------------------------------------------------------------------------------------------------------------------------------------------------------------------------------------------------------------------------------------------------------------------------------------------------------------------------------------------------------|------------|-------------------------------------------------------------------------------------------------------------------------------------------------------------------------------------------------------------------------------------------------------------------------------------------------------------------------------------------------------------------------------------------------------------------------------------------------------------------------------------------------------------------------------------------------------------------------------------------------------------------------------------------------------------------------------------------------------------------------------------------------------------------------------------------------------------------------------------------------------------------------------------------------------------------------------------------------------------------------------------------------------------------------------------------------------------------------------------------------------------------------------------------------------------------------------------------------------------------------------------------------------------------------------------------------------------------------------------------------------------------------------------------------------------------------------------------------------------------------|-------|
| LOC_Os01g73950.1 | OS-00030 | -1.1 | -2.12 | phosphorus (no P for 10d; root) vs untreated root samples (sufficient Fe and P) | Root samples of cultivar Nipponbare germinated for 2 days in distilled water and then floated for 10 days on the Yoshida nutrient solution (Yoshida et al., 1976, Laboratory Manual for Physiological Studies of Rice, Ed 3. International Rice Research Institute, Manila, The Philippines) with optimal iron (0.036mM FeCl3) concentration but lacking phosphorus (NaH2PO4). Other growth conditions: growth chamber, 12h light (450µmol photons m <sup>-2</sup> s <sup>-1</sup> ) at 30°C / 12h darkness at 22°C. | Nipponbare | Japonica ( <i>Oryza sativa</i> ssp. japonica) variety resistant to infection by the plant <i>Striga hermonthica</i> , an obligate root hemiparasite (Swarbrick et al., 2008, New Phytol. 179: 515-529). Nipponbare is susceptible to <i>Xanthomonas oryzae</i> pv. <i>oryzae</i> strains BAI3 (from Burkina Faso), PXO99A (from the Philippines; race 6), PXO86 (from the Philippines; race 2), T7174 (from Japan; race 1), and MAI1 (from Mali). Nipponbare is well transformable with <i>Agrobacterium tumefaciens</i> : using <i>A. tumefaciens</i> strain EHA 105, transient transformation frequency has been found to be 85.2%, stable transformation frequency 53.52% (Tie et al., 2012, Plant Mol. Biol. 78: 1-18). Nipponbare is susceptible to <i>Meloidogyne graminicola</i> , a root knot nematode that induces re-differentiation of root cells into multinucleate giant cells and formation of hook-like galls. Nipponbare is susceptible to <i>Magnaporthe oryzae</i> isolate FR13 (virulent isolate from France) and resistant to <i>M. oryzae</i> isolates CL3.6.7 (avirulent isolate) and BR32 (nonadapted isolate from Brazil) (Abbruscato et al., 2012, Mol Plant Pathol.; Faivre-Rampant et al., 2008, New Phytol. 180: 899-910). This variety is sensitive to drought stress; drought index 0.54 (Wei et al., 2017, Front Plant Sci. 8: 473). Nipponbare is susceptible to Rice Stripe Virus (RSV) (Zhao et al., 2016, New Phytol. 210: 196-207). | shoot |
| LOC_Os01g73950.1 | OS-00003 | 1.06 | 2.1   | arsenate (Azucena) vs untreated root samples (Azucena)                          | Root samples of rice variety Azucena grown for 7 days in hydroponics on phosphate-free nutrient solution containing 0.1mM Mg <sup>2+</sup> and SO <sub>4</sub> <sup>2-</sup> , 0.2mM Ca <sup>2+</sup> and K <sup>+</sup> , 0.6mM NO <sub>3</sub> <sup>-</sup> , and 1ppm (13.3µM) arsenate (Na <sub>2</sub> HAsO <sub>4</sub> ).                                                                                                                                                                                     | Azucena    | Traditional japonica ( <i>Oryza sativa</i> ssp. japonica) upland cultivar; origin: the Philippines. Azucena is resistant to aluminum stress (Al <sup>3+</sup> ) (Arbelaez et al., 2017, Plant Direct 1).                                                                                                                                                                                                                                                                                                                                                                                                                                                                                                                                                                                                                                                                                                                                                                                                                                                                                                                                                                                                                                                                                                                                                                                                                                                                | roots |
| LOC_Os03g59660.1 |          |      |       |                                                                                 |                                                                                                                                                                                                                                                                                                                                                                                                                                                                                                                      |            |                                                                                                                                                                                                                                                                                                                                                                                                                                                                                                                                                                                                                                                                                                                                                                                                                                                                                                                                                                                                                                                                                                                                                                                                                                                                                                                                                                                                                                                                         |       |

|  |  |  |  |                                                                                          |                                                                                                                                                                                                                                                                                                                                                                                                                                                                                                                           |                   |                                                                                                                                                                                                                                                                                                                                                                                                                                                                                                                                                                                                                                                                                                                                                                                                                                                                                                                                                                                                                                                                                                                                                                                                                                                                                                                                                                                                                                                                                                                      |              |
|--|--|--|--|------------------------------------------------------------------------------------------|---------------------------------------------------------------------------------------------------------------------------------------------------------------------------------------------------------------------------------------------------------------------------------------------------------------------------------------------------------------------------------------------------------------------------------------------------------------------------------------------------------------------------|-------------------|----------------------------------------------------------------------------------------------------------------------------------------------------------------------------------------------------------------------------------------------------------------------------------------------------------------------------------------------------------------------------------------------------------------------------------------------------------------------------------------------------------------------------------------------------------------------------------------------------------------------------------------------------------------------------------------------------------------------------------------------------------------------------------------------------------------------------------------------------------------------------------------------------------------------------------------------------------------------------------------------------------------------------------------------------------------------------------------------------------------------------------------------------------------------------------------------------------------------------------------------------------------------------------------------------------------------------------------------------------------------------------------------------------------------------------------------------------------------------------------------------------------------|--------------|
|  |  |  |  | <p>phosphorus (no P for 10d; shoot) vs untreated shoot samples (sufficient Fe and P)</p> | <p>Shoot samples of cultivar Nipponbare germinated for 2 days in distilled water and then floated for 10 days on the Yoshida nutrient solution (Yoshida et al., 1976, Laboratory Manual for Physiological Studies of Rice, Ed 3. International Rice Research Institute, Manila, The Philippines) with optimal iron (0.036mM FeCl3) concentration but lacking phosphorus (NaH2PO4). Other growth conditions: growth chamber, 12h light (450 mmol photons m<sup>-2</sup>s<sup>-1</sup>) at 30°C / 12h darkness at 22°C.</p> | <p>Nipponbare</p> | <p>Japonica (<i>Oryza sativa</i> ssp. japonica) variety resistant to infection by the plant <i>Striga hermonthica</i>, an obligate root hemiparasite (Swarbrick et al., 2008, <i>New Phytol.</i> 179: 515-529). Nipponbare is susceptible to <i>Xanthomonas oryzae</i> pv. <i>oryzae</i> strains BAI3 (from Burkina Faso), PXO99A (from the Philippines; race 6), PXO86 (from the Philippines; race 2), T7174 (from Japan; race 1), and MAI1 (from Mali). Nipponbare is well transformable with <i>Agrobacterium tumefaciens</i>: using <i>A. tumefaciens</i> strain EHA 105, transient transformation frequency has been found to be 85.2%, stable transformation frequency 53.52% (Tie et al., 2012, <i>Plant Mol. Biol.</i> 78: 1-18). Nipponbare is susceptible to <i>Meloidogyne graminicola</i>, a root knot nematode that induces re-differentiation of root cells into multinucleate giant cells and formation of hook-like galls. Nipponbare is susceptible to <i>Magnaporthe oryzae</i> isolate FR13 (virulent isolate from France) and resistant to <i>M. oryzae</i> isolates CL3.6.7 (avirulent isolate) and BR32 (nonadapted isolate from Brazil) (Abbruscato et al., 2012, <i>Mol Plant Pathol.</i>; Faivre-Rampant et al., 2008, <i>New Phytol.</i> 180: 899-910). This variety is sensitive to drought stress; drought index 0.54 (Wei et al., 2017, <i>Front Plant Sci.</i> 8: 473). Nipponbare is susceptible to Rice Stripe Virus (RSV) (Zhao et al., 2016, <i>New Phytol.</i> 210: 196-207).</p> | <p>shoot</p> |
|--|--|--|--|------------------------------------------------------------------------------------------|---------------------------------------------------------------------------------------------------------------------------------------------------------------------------------------------------------------------------------------------------------------------------------------------------------------------------------------------------------------------------------------------------------------------------------------------------------------------------------------------------------------------------|-------------------|----------------------------------------------------------------------------------------------------------------------------------------------------------------------------------------------------------------------------------------------------------------------------------------------------------------------------------------------------------------------------------------------------------------------------------------------------------------------------------------------------------------------------------------------------------------------------------------------------------------------------------------------------------------------------------------------------------------------------------------------------------------------------------------------------------------------------------------------------------------------------------------------------------------------------------------------------------------------------------------------------------------------------------------------------------------------------------------------------------------------------------------------------------------------------------------------------------------------------------------------------------------------------------------------------------------------------------------------------------------------------------------------------------------------------------------------------------------------------------------------------------------------|--------------|

|          |     |      |                                                                                                                           |                                                                                                                                                                                                                                                                                                                                                                                                                                                                                                                           |            |                                                                                                                                                                                                                                                                                                                                                                                                                                                                                                                                                                                                                                                                                                                                                                                                                                                                                                                                                                                                                                                                                                                                                                                                                                                                                                                                                                                                                                                                                                                    |       |
|----------|-----|------|---------------------------------------------------------------------------------------------------------------------------|---------------------------------------------------------------------------------------------------------------------------------------------------------------------------------------------------------------------------------------------------------------------------------------------------------------------------------------------------------------------------------------------------------------------------------------------------------------------------------------------------------------------------|------------|--------------------------------------------------------------------------------------------------------------------------------------------------------------------------------------------------------------------------------------------------------------------------------------------------------------------------------------------------------------------------------------------------------------------------------------------------------------------------------------------------------------------------------------------------------------------------------------------------------------------------------------------------------------------------------------------------------------------------------------------------------------------------------------------------------------------------------------------------------------------------------------------------------------------------------------------------------------------------------------------------------------------------------------------------------------------------------------------------------------------------------------------------------------------------------------------------------------------------------------------------------------------------------------------------------------------------------------------------------------------------------------------------------------------------------------------------------------------------------------------------------------------|-------|
| OS-00036 | 1.5 | 2.76 | iron;<br>phosphorus<br>(no Fe and P<br>for 10d;<br>shoot) vs<br>untreated<br>shoot<br>samples<br>(sufficient<br>Fe and P) | Shoot samples of cultivar Nipponbare germinated for 2 days in distilled water and then floated for 10 days on the Yoshida nutrient solution (Yoshida et al., 1976, Laboratory Manual for Physiological Studies of Rice, Ed 3. International Rice Research Institute, Manila, The Philippines) lacking iron (FeCl <sub>3</sub> ) and phosphorus (NaH <sub>2</sub> PO <sub>4</sub> ). Other growth conditions: growth chamber, 12h light (450μmol photons m <sup>-2</sup> s <sup>-1</sup> ) at 30°C / 12h darkness at 22°C. | Nipponbare | Japonica ( <i>Oryza sativa</i> ssp. japonica) variety resistant to infection by the plant <i>Striga hermonthica</i> , an obligate root hemiparasite (Swarbrick et al., 2008, <i>New Phytol.</i> 179: 515-529). Nipponbare is susceptible to <i>Xanthomonas oryzae</i> pv. <i>oryzae</i> strains BAI3 (from Burkina Faso), PXO99A (from the Philippines; race 6), PXO86 (from the Philippines; race 2), T7174 (from Japan; race 1), and MAI1 (from Mali). Nipponbare is well transformable with <i>Agrobacterium tumefaciens</i> : using <i>A. tumefaciens</i> strain EHA 105, transient transformation frequency has been found to be 85.2%, stable transformation frequency 53.52% (Tie et al., 2012, <i>Plant Mol. Biol.</i> 78: 1-18). Nipponbare is susceptible to <i>Meloidogyne graminicola</i> , a root knot nematode that induces re-differentiation of root cells into multinucleate giant cells and formation of hook-like galls. Nipponbare is susceptible to <i>Magnaporthe oryzae</i> isolate FR13 (virulent isolate from France) and resistant to <i>M. oryzae</i> isolates CL3.6.7 (avirulent isolate) and BR32 (nonadapted isolate from Brazil) (Abbruscato et al., 2012, <i>Mol Plant Pathol.</i> ; Faivre-Rampant et al., 2008, <i>New Phytol.</i> 180: 899-910). This variety is sensitive to drought stress; drought index 0.54 (Wei et al., 2017, <i>Front Plant Sci.</i> 8: 473). Nipponbare is susceptible to Rice Stripe Virus (RSV) (Zhao et al., 2016, <i>New Phytol.</i> 210: 196-207). | shoot |
|----------|-----|------|---------------------------------------------------------------------------------------------------------------------------|---------------------------------------------------------------------------------------------------------------------------------------------------------------------------------------------------------------------------------------------------------------------------------------------------------------------------------------------------------------------------------------------------------------------------------------------------------------------------------------------------------------------------|------------|--------------------------------------------------------------------------------------------------------------------------------------------------------------------------------------------------------------------------------------------------------------------------------------------------------------------------------------------------------------------------------------------------------------------------------------------------------------------------------------------------------------------------------------------------------------------------------------------------------------------------------------------------------------------------------------------------------------------------------------------------------------------------------------------------------------------------------------------------------------------------------------------------------------------------------------------------------------------------------------------------------------------------------------------------------------------------------------------------------------------------------------------------------------------------------------------------------------------------------------------------------------------------------------------------------------------------------------------------------------------------------------------------------------------------------------------------------------------------------------------------------------------|-------|

qRPUpE3.7

LOC\_Os03g59670.1

|          |      |      |                                                                                 |                                                                                                                                                                                                                                                                                                                                                                                                                                                                                                                      |            |                                                                                                                                                                                                                                                                                                                                                                                                                                                                                                                                                                                                                                                                                                                                                                                                                                                                                                                                                                                                                                                                                                                                                                                                                                                                                                                                                                                                                                                                                                                    |       |
|----------|------|------|---------------------------------------------------------------------------------|----------------------------------------------------------------------------------------------------------------------------------------------------------------------------------------------------------------------------------------------------------------------------------------------------------------------------------------------------------------------------------------------------------------------------------------------------------------------------------------------------------------------|------------|--------------------------------------------------------------------------------------------------------------------------------------------------------------------------------------------------------------------------------------------------------------------------------------------------------------------------------------------------------------------------------------------------------------------------------------------------------------------------------------------------------------------------------------------------------------------------------------------------------------------------------------------------------------------------------------------------------------------------------------------------------------------------------------------------------------------------------------------------------------------------------------------------------------------------------------------------------------------------------------------------------------------------------------------------------------------------------------------------------------------------------------------------------------------------------------------------------------------------------------------------------------------------------------------------------------------------------------------------------------------------------------------------------------------------------------------------------------------------------------------------------------------|-------|
|          | 1.14 | 2.2  | phosphorus (no P for 10d; root) vs untreated root samples (sufficient Fe and P) | Root samples of cultivar Nipponbare germinated for 2 days in distilled water and then floated for 10 days on the Yoshida nutrient solution (Yoshida et al., 1976, Laboratory Manual for Physiological Studies of Rice, Ed 3. International Rice Research Institute, Manila, The Philippines) with optimal iron (0.036mM FeCl3) concentration but lacking phosphorus (NaH2PO4). Other growth conditions: growth chamber, 12h light (450μmol photons m <sup>-2</sup> s <sup>-1</sup> ) at 30°C / 12h darkness at 22°C. | Nipponbare | Japonica ( <i>Oryza sativa</i> ssp. japonica) variety resistant to infection by the plant <i>Striga hermonthica</i> , an obligate root hemiparasite (Swarbrick et al., 2008, <i>New Phytol.</i> 179: 515-529). Nipponbare is susceptible to <i>Xanthomonas oryzae</i> pv. <i>oryzae</i> strains BAI3 (from Burkina Faso), PXO99A (from the Philippines; race 6), PXO86 (from the Philippines; race 2), T7174 (from Japan; race 1), and MAI1 (from Mali). Nipponbare is well transformable with <i>Agrobacterium tumefaciens</i> : using <i>A. tumefaciens</i> strain EHA 105, transient transformation frequency has been found to be 85.2%, stable transformation frequency 53.52% (Tie et al., 2012, <i>Plant Mol. Biol.</i> 78: 1-18). Nipponbare is susceptible to <i>Meloidogyne graminicola</i> , a root knot nematode that induces re-differentiation of root cells into multinucleate giant cells and formation of hook-like galls. Nipponbare is susceptible to <i>Magnaporthe oryzae</i> isolate FR13 (virulent isolate from France) and resistant to <i>M. oryzae</i> isolates CL3.6.7 (avirulent isolate) and BR32 (nonadapted isolate from Brazil) (Abbruscato et al., 2012, <i>Mol Plant Pathol.</i> ; Faivre-Rampant et al., 2008, <i>New Phytol.</i> 180: 899-910). This variety is sensitive to drought stress; drought index 0.54 (Wei et al., 2017, <i>Front Plant Sci.</i> 8: 473). Nipponbare is susceptible to Rice Stripe Virus (RSV) (Zhao et al., 2016, <i>New Phytol.</i> 210: 196-207). | roots |
| OS-00096 | 1.04 | 2.06 | phosphorus (IR64-null; no P fertilizer) vs phosphorus (IR64-null; 60kg/ha P2O5) | Root samples of IR64-null line grown till the heading stage on phosphorus-deficient soil from Siniloan, Luzon, the Philippines (P-Bray, 1.23 ± 0.30mgkg <sup>-1</sup> ; P-Olsen, 0.77 ± 0.46 mgkg <sup>-1</sup> ) under dry-down conditions.                                                                                                                                                                                                                                                                         | IR64-null  | Non-transgenic, phosphorus-starvation-intolerant line from the segregating progeny of a transformant heterozygous for the 35S::PSTOL1 transgene; sibling of the transgenic 35S::PSTOL1 (20) line.                                                                                                                                                                                                                                                                                                                                                                                                                                                                                                                                                                                                                                                                                                                                                                                                                                                                                                                                                                                                                                                                                                                                                                                                                                                                                                                  | roots |

|  |                  |          |       |                                                                              |                                                                                                                                                                                                                                                                                                                                                                                                                                                                                                                                       |            |                                                                                                                                                                                                                                                                                                                                                                                                                                                                                                                                                                                                                                                                                                                                                                                                                                                                                                                                                                                                                                                                                                                                                                                                                                                                                                                                                                                                                                                                         |       |  |
|--|------------------|----------|-------|------------------------------------------------------------------------------|---------------------------------------------------------------------------------------------------------------------------------------------------------------------------------------------------------------------------------------------------------------------------------------------------------------------------------------------------------------------------------------------------------------------------------------------------------------------------------------------------------------------------------------|------------|-------------------------------------------------------------------------------------------------------------------------------------------------------------------------------------------------------------------------------------------------------------------------------------------------------------------------------------------------------------------------------------------------------------------------------------------------------------------------------------------------------------------------------------------------------------------------------------------------------------------------------------------------------------------------------------------------------------------------------------------------------------------------------------------------------------------------------------------------------------------------------------------------------------------------------------------------------------------------------------------------------------------------------------------------------------------------------------------------------------------------------------------------------------------------------------------------------------------------------------------------------------------------------------------------------------------------------------------------------------------------------------------------------------------------------------------------------------------------|-------|--|
|  |                  |          |       |                                                                              |                                                                                                                                                                                                                                                                                                                                                                                                                                                                                                                                       |            |                                                                                                                                                                                                                                                                                                                                                                                                                                                                                                                                                                                                                                                                                                                                                                                                                                                                                                                                                                                                                                                                                                                                                                                                                                                                                                                                                                                                                                                                         |       |  |
|  | OS-00036         | -1.05    | -2.03 | iron (no Fe for 10d; shoot) vs iron; phosphorus (no Fe and P for 10d; shoot) | Shoot samples of cultivar Nipponbare germinated for 2 days in distilled water and then floated for 10 days on the Yoshida nutrient solution (Yoshida et al., 1976, Laboratory Manual for Physiological Studies of Rice, Ed 3. International Rice Research Institute, Manila, The Philippines) with optimal phosphorus (0.323mM NaH2PO4) concentration but lacking iron (FeCl3) and citric acid. Other growth conditions: growth chamber, 12h light (450µmol photons m <sup>-2</sup> s <sup>-1</sup> ) at 30°C / 12h darkness at 22°C. | Nipponbare | Japonica ( <i>Oryza sativa</i> ssp. japonica) variety resistant to infection by the plant <i>Striga hermonthica</i> , an obligate root hemiparasite (Swarbrick et al., 2008, New Phytol. 179: 515-529). Nipponbare is susceptible to <i>Xanthomonas oryzae</i> pv. <i>oryzae</i> strains BAI3 (from Burkina Faso), PXO99A (from the Philippines; race 6), PXO86 (from the Philippines; race 2), T7174 (from Japan; race 1), and MAI1 (from Mali). Nipponbare is well transformable with <i>Agrobacterium tumefaciens</i> : using <i>A. tumefaciens</i> strain EHA 105, transient transformation frequency has been found to be 85.2%, stable transformation frequency 53.52% (Tie et al., 2012, Plant Mol. Biol. 78: 1-18). Nipponbare is susceptible to <i>Meloidogyne graminicola</i> , a root knot nematode that induces re-differentiation of root cells into multinucleate giant cells and formation of hook-like galls. Nipponbare is susceptible to <i>Magnaporthe oryzae</i> isolate FR13 (virulent isolate from France) and resistant to <i>M. oryzae</i> isolates CL3.6.7 (avirulent isolate) and BR32 (nonadapted isolate from Brazil) (Abbruscato et al., 2012, Mol Plant Pathol.; Faivre-Rampant et al., 2008, New Phytol. 180: 899-910). This variety is sensitive to drought stress; drought index 0.54 (Wei et al., 2017, Front Plant Sci. 8: 473). Nipponbare is susceptible to Rice Stripe Virus (RSV) (Zhao et al., 2016, New Phytol. 210: 196-207). | shoot |  |
|  | LOC_Os03g59680.1 |          |       |                                                                              |                                                                                                                                                                                                                                                                                                                                                                                                                                                                                                                                       |            |                                                                                                                                                                                                                                                                                                                                                                                                                                                                                                                                                                                                                                                                                                                                                                                                                                                                                                                                                                                                                                                                                                                                                                                                                                                                                                                                                                                                                                                                         |       |  |
|  | LOC_Os03g59690.1 |          |       |                                                                              |                                                                                                                                                                                                                                                                                                                                                                                                                                                                                                                                       |            |                                                                                                                                                                                                                                                                                                                                                                                                                                                                                                                                                                                                                                                                                                                                                                                                                                                                                                                                                                                                                                                                                                                                                                                                                                                                                                                                                                                                                                                                         |       |  |
|  | LOC_Os03g59700.1 |          |       |                                                                              |                                                                                                                                                                                                                                                                                                                                                                                                                                                                                                                                       |            |                                                                                                                                                                                                                                                                                                                                                                                                                                                                                                                                                                                                                                                                                                                                                                                                                                                                                                                                                                                                                                                                                                                                                                                                                                                                                                                                                                                                                                                                         |       |  |
|  | LOC_Os03g59710.1 |          |       |                                                                              |                                                                                                                                                                                                                                                                                                                                                                                                                                                                                                                                       |            |                                                                                                                                                                                                                                                                                                                                                                                                                                                                                                                                                                                                                                                                                                                                                                                                                                                                                                                                                                                                                                                                                                                                                                                                                                                                                                                                                                                                                                                                         |       |  |
|  | LOC_Os03g59720.1 |          |       |                                                                              |                                                                                                                                                                                                                                                                                                                                                                                                                                                                                                                                       |            |                                                                                                                                                                                                                                                                                                                                                                                                                                                                                                                                                                                                                                                                                                                                                                                                                                                                                                                                                                                                                                                                                                                                                                                                                                                                                                                                                                                                                                                                         |       |  |
|  | LOC_Os03g59730.1 |          |       |                                                                              |                                                                                                                                                                                                                                                                                                                                                                                                                                                                                                                                       |            |                                                                                                                                                                                                                                                                                                                                                                                                                                                                                                                                                                                                                                                                                                                                                                                                                                                                                                                                                                                                                                                                                                                                                                                                                                                                                                                                                                                                                                                                         |       |  |
|  | LOC_Os03g59740.1 |          |       |                                                                              |                                                                                                                                                                                                                                                                                                                                                                                                                                                                                                                                       |            |                                                                                                                                                                                                                                                                                                                                                                                                                                                                                                                                                                                                                                                                                                                                                                                                                                                                                                                                                                                                                                                                                                                                                                                                                                                                                                                                                                                                                                                                         |       |  |
|  | LOC_Os03g60190.1 | OS-00003 | 1.74  | 3.38                                                                         | arsenate (Bala) vs untreated root samples (Bala)                                                                                                                                                                                                                                                                                                                                                                                                                                                                                      | Bala       | Improved indica upland cultivar; origin: Eastern India.                                                                                                                                                                                                                                                                                                                                                                                                                                                                                                                                                                                                                                                                                                                                                                                                                                                                                                                                                                                                                                                                                                                                                                                                                                                                                                                                                                                                                 | roots |  |

|                  |          |      |      |                                                                      |                                                                                                                                                                                                                                                                                                                                                                                                                                                                                                                                                                             |            |                                                                                                                                                                                                                                                                                                                                                                                                                                                                                                                                                                                                                                                                                                                                                                                                                                                                                                                                                                                                                                                                                                                                                                                                                                                                                                                                                                                                                                                                         |       |
|------------------|----------|------|------|----------------------------------------------------------------------|-----------------------------------------------------------------------------------------------------------------------------------------------------------------------------------------------------------------------------------------------------------------------------------------------------------------------------------------------------------------------------------------------------------------------------------------------------------------------------------------------------------------------------------------------------------------------------|------------|-------------------------------------------------------------------------------------------------------------------------------------------------------------------------------------------------------------------------------------------------------------------------------------------------------------------------------------------------------------------------------------------------------------------------------------------------------------------------------------------------------------------------------------------------------------------------------------------------------------------------------------------------------------------------------------------------------------------------------------------------------------------------------------------------------------------------------------------------------------------------------------------------------------------------------------------------------------------------------------------------------------------------------------------------------------------------------------------------------------------------------------------------------------------------------------------------------------------------------------------------------------------------------------------------------------------------------------------------------------------------------------------------------------------------------------------------------------------------|-------|
| LOC_Os03g06190.1 | OS-00003 | 1.04 | 2.02 | arsenate (Azucena) vs untreated root samples (Azucena)               | Root samples of rice variety Azucena grown for 7 days in hydroponics on phosphate-free nutrient solution containing 0.1mM Mg <sup>2+</sup> and SO <sub>4</sub> <sup>2-</sup> , 0.2mM Ca <sup>2+</sup> and K <sup>+</sup> , 0.6mM NO <sub>3</sub> <sup>-</sup> , and 1ppm (13.3μM) arsenate (Na <sub>2</sub> HAsO <sub>4</sub> ).                                                                                                                                                                                                                                            | Azucena    | Traditional japonica ( <i>Oryza sativa</i> ssp. japonica) upland cultivar; origin: the Philippines. Azucena is resistant to aluminum stress (Al <sup>3+</sup> ) (Arbelaez et al., 2017, Plant Direct 1).                                                                                                                                                                                                                                                                                                                                                                                                                                                                                                                                                                                                                                                                                                                                                                                                                                                                                                                                                                                                                                                                                                                                                                                                                                                                | roots |
| LOC_Os03g60200.1 |          |      |      |                                                                      |                                                                                                                                                                                                                                                                                                                                                                                                                                                                                                                                                                             |            |                                                                                                                                                                                                                                                                                                                                                                                                                                                                                                                                                                                                                                                                                                                                                                                                                                                                                                                                                                                                                                                                                                                                                                                                                                                                                                                                                                                                                                                                         |       |
|                  | OS-00036 | 1.53 | 2.88 | iron (no Fe for 10d; root) vs phosphorus (no Fe and P for 10d; root) | Root samples of cultivar Nipponbare germinated for 2 days in distilled water and then floated for 10 days on the Yoshida nutrient solution (Yoshida et al., 1976, Laboratory Manual for Physiological Studies of Rice, Ed 3. International Rice Research Institute, Manila, The Philippines) with optimal phosphorus (0.323mM NaH <sub>2</sub> PO <sub>4</sub> ) concentration but lacking iron (FeCl <sub>3</sub> ) and citric acid. Other growth conditions: growth chamber, 12h light (450μmol photons m <sup>-2</sup> s <sup>-1</sup> ) at 30°C / 12h darkness at 22°C. | Nipponbare | Japonica ( <i>Oryza sativa</i> ssp. japonica) variety resistant to infection by the plant <i>Striga hermonthica</i> , an obligate root hemiparasite (Swarbrick et al., 2008, New Phytol. 179: 515-529). Nipponbare is susceptible to <i>Xanthomonas oryzae</i> pv. <i>oryzae</i> strains BAI3 (from Burkina Faso), PXO99A (from the Philippines; race 6), PXO86 (from the Philippines; race 2), T7174 (from Japan; race 1), and MAI1 (from Mali). Nipponbare is well transformable with <i>Agrobacterium tumefaciens</i> : using <i>A. tumefaciens</i> strain EHA 105, transient transformation frequency has been found to be 85.2%, stable transformation frequency 53.52% (Tie et al., 2012, Plant Mol. Biol. 78: 1-18). Nipponbare is susceptible to <i>Meloidogyne graminicola</i> , a root knot nematode that induces re-differentiation of root cells into multinucleate giant cells and formation of hook-like galls. Nipponbare is susceptible to <i>Magnaporthe oryzae</i> isolate FR13 (virulent isolate from France) and resistant to <i>M. oryzae</i> isolates CL3.6.7 (avirulent isolate) and BR32 (nonadapted isolate from Brazil) (Abbruscato et al., 2012, Mol Plant Pathol.; Faivre-Rampant et al., 2008, New Phytol. 180: 899-910). This variety is sensitive to drought stress; drought index 0.54 (Wei et al., 2017, Front Plant Sci. 8: 473). Nipponbare is susceptible to Rice Stripe Virus (RSV) (Zhao et al., 2016, New Phytol. 210: 196-207). | roots |

|  |      |      |                                                                            |                                                                                                                                                                                                                                                                                                                                                                                                                                                                                                                                                                          |            |                                                                                                                                                                                                                                                                                                                                                                                                                                                                                                                                                                                                                                                                                                                                                                                                                                                                                                                                                                                                                                                                                                                                                                                                                                                                                                                                                                                                                                                                                                                      |       |
|--|------|------|----------------------------------------------------------------------------|--------------------------------------------------------------------------------------------------------------------------------------------------------------------------------------------------------------------------------------------------------------------------------------------------------------------------------------------------------------------------------------------------------------------------------------------------------------------------------------------------------------------------------------------------------------------------|------------|----------------------------------------------------------------------------------------------------------------------------------------------------------------------------------------------------------------------------------------------------------------------------------------------------------------------------------------------------------------------------------------------------------------------------------------------------------------------------------------------------------------------------------------------------------------------------------------------------------------------------------------------------------------------------------------------------------------------------------------------------------------------------------------------------------------------------------------------------------------------------------------------------------------------------------------------------------------------------------------------------------------------------------------------------------------------------------------------------------------------------------------------------------------------------------------------------------------------------------------------------------------------------------------------------------------------------------------------------------------------------------------------------------------------------------------------------------------------------------------------------------------------|-------|
|  | 1.49 | 2.81 | iron (no Fe for 10d; root) vs untreated root samples (sufficient Fe and P) | <p>Root samples of cultivar Nipponbare germinated for 2 days in distilled water and then floated for 10 days on the Yoshida nutrient solution (Yoshida et al., 1976, Laboratory Manual for Physiological Studies of Rice, Ed 3. International Rice Research Institute, Manila, The Philippines) with optimal phosphorus (0.323mM NaH<sub>2</sub>PO<sub>4</sub>) concentration but lacking iron (FeCl<sub>3</sub>) and citric acid. Other growth conditions: growth chamber, 12h light (450μmol photons m<sup>-2</sup>s<sup>-1</sup>) at 30°C / 12h darkness at 22°C.</p> | Nipponbare | <p>Japonica (<i>Oryza sativa</i> ssp. japonica) variety resistant to infection by the plant <i>Striga hermonthica</i>, an obligate root hemiparasite (Swarbrick et al., 2008, <i>New Phytol.</i> 179: 515-529). Nipponbare is susceptible to <i>Xanthomonas oryzae</i> pv. <i>oryzae</i> strains BAI3 (from Burkina Faso), PXO99A (from the Philippines; race 6), PXO86 (from the Philippines; race 2), T7174 (from Japan; race 1), and MAI1 (from Mali). Nipponbare is well transformable with <i>Agrobacterium tumefaciens</i>: using <i>A. tumefaciens</i> strain EHA 105, transient transformation frequency has been found to be 85.2%, stable transformation frequency 53.52% (Tie et al., 2012, <i>Plant Mol. Biol.</i> 78: 1-18). Nipponbare is susceptible to <i>Meloidogyne graminicola</i>, a root knot nematode that induces re-differentiation of root cells into multinucleate giant cells and formation of hook-like galls. Nipponbare is susceptible to <i>Magnaporthe oryzae</i> isolate FR13 (virulent isolate from France) and resistant to <i>M. oryzae</i> isolates CL3.6.7 (avirulent isolate) and BR32 (nonadapted isolate from Brazil) (Abbruscato et al., 2012, <i>Mol Plant Pathol.</i>; Faivre-Rampant et al., 2008, <i>New Phytol.</i> 180: 899-910). This variety is sensitive to drought stress; drought index 0.54 (Wei et al., 2017, <i>Front Plant Sci.</i> 8: 473). Nipponbare is susceptible to Rice Stripe Virus (RSV) (Zhao et al., 2016, <i>New Phytol.</i> 210: 196-207).</p> | roots |
|--|------|------|----------------------------------------------------------------------------|--------------------------------------------------------------------------------------------------------------------------------------------------------------------------------------------------------------------------------------------------------------------------------------------------------------------------------------------------------------------------------------------------------------------------------------------------------------------------------------------------------------------------------------------------------------------------|------------|----------------------------------------------------------------------------------------------------------------------------------------------------------------------------------------------------------------------------------------------------------------------------------------------------------------------------------------------------------------------------------------------------------------------------------------------------------------------------------------------------------------------------------------------------------------------------------------------------------------------------------------------------------------------------------------------------------------------------------------------------------------------------------------------------------------------------------------------------------------------------------------------------------------------------------------------------------------------------------------------------------------------------------------------------------------------------------------------------------------------------------------------------------------------------------------------------------------------------------------------------------------------------------------------------------------------------------------------------------------------------------------------------------------------------------------------------------------------------------------------------------------------|-------|

|          |       |       |                                                                          |                                                                                                                                                                                                                                                                                                                                                                                                                                                                                                                   |       |                                                                                                                                                                                                                                                                                                                                                                                                                                                                                                                                                                                                                                                                                                                                                                                                                                                                                                                                                                                                         |       |
|----------|-------|-------|--------------------------------------------------------------------------|-------------------------------------------------------------------------------------------------------------------------------------------------------------------------------------------------------------------------------------------------------------------------------------------------------------------------------------------------------------------------------------------------------------------------------------------------------------------------------------------------------------------|-------|---------------------------------------------------------------------------------------------------------------------------------------------------------------------------------------------------------------------------------------------------------------------------------------------------------------------------------------------------------------------------------------------------------------------------------------------------------------------------------------------------------------------------------------------------------------------------------------------------------------------------------------------------------------------------------------------------------------------------------------------------------------------------------------------------------------------------------------------------------------------------------------------------------------------------------------------------------------------------------------------------------|-------|
| OS-00239 | -0.38 | -0.56 | phosphorus (Dular; 1μM Pi; shoot) vs phosphorus (Dular; 320μM Pi; shoot) | Shoot samples of 15-day-old Dular seedlings grown in a phosphate deficient nutrient solution (1μM Pi); the solution (pH 5.5) was exchanged every 24h. Other growth conditions: growth chamber, 16h light (250-300μmol photons m <sup>-2</sup> s <sup>-1</sup> ) at 30°C / 8h darkness at 28°C cycles, 70% relative humidity. The nutrient solution as described in (Yoshida et al., 1976, Laboratory Manual for Physiological Studies of Rice, Ed 3, International Rice Research Institute, Manila, Philippines). | Dular | Traditional <i>Oryza sativa</i> ssp. indica variety with very low yield potential (7-22q/ha) and high tolerance to low phosphate (Pi) content in the soil. Dular is more efficient in Pi utilization and better preserves root growth under Pi-limiting conditions than a low Pi-sensitive variety, Pusa Basmati 1. When plants were grown under low Pi (1μM) for 15 days, Dular root length was 9.38 ± 0.17cm while Pusa Basmati 1 root length was 7.41 ± 0.15cm. Under low Pi, Dular produced more and longer lateral roots than Pusa Basmati 1. Even though under sufficient Pi root and shoot Pi content was lower in Dular than in Pusa Basmati 1, under low Pi root and shoot Pi content was higher in Dular than in Pusa Basmati 1 (Mehra et al., 2016, Front Plant Sci. 6: 1184). Dular belongs to wide-compatibility variety (WCV) rice germplasms, i.e. Dular is able to produce fertile hybrids when crossed to indica or japonica varieties (Wang et al., 1998, Theor Appl Genet. 97: 407). | shoot |
|----------|-------|-------|--------------------------------------------------------------------------|-------------------------------------------------------------------------------------------------------------------------------------------------------------------------------------------------------------------------------------------------------------------------------------------------------------------------------------------------------------------------------------------------------------------------------------------------------------------------------------------------------------------|-------|---------------------------------------------------------------------------------------------------------------------------------------------------------------------------------------------------------------------------------------------------------------------------------------------------------------------------------------------------------------------------------------------------------------------------------------------------------------------------------------------------------------------------------------------------------------------------------------------------------------------------------------------------------------------------------------------------------------------------------------------------------------------------------------------------------------------------------------------------------------------------------------------------------------------------------------------------------------------------------------------------------|-------|



LOC\_Os03g60210.1

|          |       |       |                                                                                   |                                                                                                                                                                                                                                                                                                                                                                                                                                                                                                                        |            |                                                                                                                                                                                                                                                                                                                                                                                                                                                                                                                                                                                                                                                                                                                                                                                                                                                                                                                                                                                                                                                                                                                                                                                                                                                                                                                                                                                                                                                                                                                    |       |
|----------|-------|-------|-----------------------------------------------------------------------------------|------------------------------------------------------------------------------------------------------------------------------------------------------------------------------------------------------------------------------------------------------------------------------------------------------------------------------------------------------------------------------------------------------------------------------------------------------------------------------------------------------------------------|------------|--------------------------------------------------------------------------------------------------------------------------------------------------------------------------------------------------------------------------------------------------------------------------------------------------------------------------------------------------------------------------------------------------------------------------------------------------------------------------------------------------------------------------------------------------------------------------------------------------------------------------------------------------------------------------------------------------------------------------------------------------------------------------------------------------------------------------------------------------------------------------------------------------------------------------------------------------------------------------------------------------------------------------------------------------------------------------------------------------------------------------------------------------------------------------------------------------------------------------------------------------------------------------------------------------------------------------------------------------------------------------------------------------------------------------------------------------------------------------------------------------------------------|-------|
| OS-00036 | -1.17 | -2.25 | phosphorus (no P for 10d; shoot) vs iron; phosphorus (no Fe and P for 10d; shoot) | Shoot samples of cultivar Nipponbare germinated for 2 days in distilled water and then floated for 10 days on the Yoshida nutrient solution (Yoshida et al., 1976, Laboratory Manual for Physiological Studies of Rice, Ed 3. International Rice Research Institute, Manila, The Philippines) with optimal iron (0.036mM FeCl3) concentration but lacking phosphorus (NaH2PO4). Other growth conditions: growth chamber, 12h light (450 mmol photons m <sup>-2</sup> s <sup>-1</sup> ) at 30°C / 12h darkness at 22°C. | Nipponbare | Japonica ( <i>Oryza sativa</i> ssp. japonica) variety resistant to infection by the plant <i>Striga hermonthica</i> , an obligate root hemiparasite (Swarbrick et al., 2008, <i>New Phytol.</i> 179: 515-529). Nipponbare is susceptible to <i>Xanthomonas oryzae</i> pv. <i>oryzae</i> strains BAI3 (from Burkina Faso), PXO99A (from the Philippines; race 6), PXO86 (from the Philippines; race 2), T7174 (from Japan; race 1), and MAI1 (from Mali). Nipponbare is well transformable with <i>Agrobacterium tumefaciens</i> : using <i>A. tumefaciens</i> strain EHA 105, transient transformation frequency has been found to be 85.2%, stable transformation frequency 53.52% (Tie et al., 2012, <i>Plant Mol. Biol.</i> 78: 1-18). Nipponbare is susceptible to <i>Meloidogyne graminicola</i> , a root knot nematode that induces re-differentiation of root cells into multinucleate giant cells and formation of hook-like galls. Nipponbare is susceptible to <i>Magnaporthe oryzae</i> isolate FR13 (virulent isolate from France) and resistant to <i>M. oryzae</i> isolates CL3.6.7 (avirulent isolate) and BR32 (nonadapted isolate from Brazil) (Abbruscato et al., 2012, <i>Mol Plant Pathol.</i> ; Faivre-Rampant et al., 2008, <i>New Phytol.</i> 180: 899-910). This variety is sensitive to drought stress; drought index 0.54 (Wei et al., 2017, <i>Front Plant Sci.</i> 8: 473). Nipponbare is susceptible to Rice Stripe Virus (RSV) (Zhao et al., 2016, <i>New Phytol.</i> 210: 196-207). | shoot |
|----------|-------|-------|-----------------------------------------------------------------------------------|------------------------------------------------------------------------------------------------------------------------------------------------------------------------------------------------------------------------------------------------------------------------------------------------------------------------------------------------------------------------------------------------------------------------------------------------------------------------------------------------------------------------|------------|--------------------------------------------------------------------------------------------------------------------------------------------------------------------------------------------------------------------------------------------------------------------------------------------------------------------------------------------------------------------------------------------------------------------------------------------------------------------------------------------------------------------------------------------------------------------------------------------------------------------------------------------------------------------------------------------------------------------------------------------------------------------------------------------------------------------------------------------------------------------------------------------------------------------------------------------------------------------------------------------------------------------------------------------------------------------------------------------------------------------------------------------------------------------------------------------------------------------------------------------------------------------------------------------------------------------------------------------------------------------------------------------------------------------------------------------------------------------------------------------------------------------|-------|

|          |       |       |                                                                                   |                                                                                                                                                                                                                                                                                                                                                                                                                                                                                                                     |       |                                                                                                                                                                                                                                                                                                                                                                                                                                                                                                                                                                                                                                                                                                                                                                                                                                                                                                                                                                                                         |       |
|----------|-------|-------|-----------------------------------------------------------------------------------|---------------------------------------------------------------------------------------------------------------------------------------------------------------------------------------------------------------------------------------------------------------------------------------------------------------------------------------------------------------------------------------------------------------------------------------------------------------------------------------------------------------------|-------|---------------------------------------------------------------------------------------------------------------------------------------------------------------------------------------------------------------------------------------------------------------------------------------------------------------------------------------------------------------------------------------------------------------------------------------------------------------------------------------------------------------------------------------------------------------------------------------------------------------------------------------------------------------------------------------------------------------------------------------------------------------------------------------------------------------------------------------------------------------------------------------------------------------------------------------------------------------------------------------------------------|-------|
| OS-00239 | -1.3  | -2.41 | phosphorus (Dular; 1μM Pi; shoot) vs phosphorus (Pusa Basmati 1; 1μM Pi; shoot)   | Shoot samples of 15-day-old Dular seedlings grown in a phosphate deficient nutrient solution (1μM Pi); the solution (pH 5.5) was exchanged every 24h. Other growth conditions: growth chamber, 16h light (250-300μmol photons m <sup>-2</sup> s <sup>-1</sup> ) at 30°C / 8h darkness at 28°C cycles, 70% relative humidity. The nutrient solution as described in (Yoshida et al., 1976, Laboratory Manual for Physiological Studies of Rice, Ed 3, International Rice Research Institute, Manila, Philippines).   | Dular | Traditional <i>Oryza sativa</i> ssp. indica variety with very low yield potential (7-22q/ha) and high tolerance to low phosphate (Pi) content in the soil. Dular is more efficient in Pi utilization and better preserves root growth under Pi-limiting conditions than a low Pi-sensitive variety, Pusa Basmati 1. When plants were grown under low Pi (1μM) for 15 days, Dular root length was 9.38 ± 0.17cm while Pusa Basmati 1 root length was 7.41 ± 0.15cm. Under low Pi, Dular produced more and longer lateral roots than Pusa Basmati 1. Even though under sufficient Pi root and shoot Pi content was lower in Dular than in Pusa Basmati 1, under low Pi root and shoot Pi content was higher in Dular than in Pusa Basmati 1 (Mehra et al., 2016, Front Plant Sci. 6: 1184). Dular belongs to wide-compatibility variety (WCV) rice germplasms, i.e. Dular is able to produce fertile hybrids when crossed to indica or japonica varieties (Wang et al., 1998, Theor Appl Genet. 97: 407). | shoot |
|          | -2.04 | -4.3  | phosphorus (Dular; 320μM Pi; root) vs phosphorus (Pusa Basmati 1; 320μM Pi; root) | Root samples of 15-day-old Dular seedlings grown in a phosphate sufficient nutrient solution (320μM Pi); the solution (pH 5.5) was exchanged every 24h. Other growth conditions: growth chamber, 16h light (250-300μmol photons m <sup>-2</sup> s <sup>-1</sup> ) at 30°C / 8h darkness at 28°C cycles, 70% relative humidity. The nutrient solution as described in (Yoshida et al., 1976, Laboratory Manual for Physiological Studies of Rice, Ed 3, International Rice Research Institute, Manila, Philippines). | Dular | Traditional <i>Oryza sativa</i> ssp. indica variety with very low yield potential (7-22q/ha) and high tolerance to low phosphate (Pi) content in the soil. Dular is more efficient in Pi utilization and better preserves root growth under Pi-limiting conditions than a low Pi-sensitive variety, Pusa Basmati 1. When plants were grown under low Pi (1μM) for 15 days, Dular root length was 9.38 ± 0.17cm while Pusa Basmati 1 root length was 7.41 ± 0.15cm. Under low Pi, Dular produced more and longer lateral roots than Pusa Basmati 1. Even though under sufficient Pi root and shoot Pi content was lower in Dular than in Pusa Basmati 1, under low Pi root and shoot Pi content was higher in Dular than in Pusa Basmati 1 (Mehra et al., 2016, Front Plant Sci. 6: 1184). Dular belongs to wide-compatibility variety (WCV) rice germplasms, i.e. Dular is able to produce fertile hybrids when crossed to indica or japonica varieties (Wang et al., 1998, Theor Appl Genet. 97: 407). | roots |

|  |          |       |       |                                                                               |                                                                                                                                                                                                                                                                                                                                                                                                                                                                                                                  |       |                                                                                                                                                                                                                                                                                                                                                                                                                                                                                                                                                                                                                                                                                                                                                                                                                                                                                                                                                                                                        |       |
|--|----------|-------|-------|-------------------------------------------------------------------------------|------------------------------------------------------------------------------------------------------------------------------------------------------------------------------------------------------------------------------------------------------------------------------------------------------------------------------------------------------------------------------------------------------------------------------------------------------------------------------------------------------------------|-------|--------------------------------------------------------------------------------------------------------------------------------------------------------------------------------------------------------------------------------------------------------------------------------------------------------------------------------------------------------------------------------------------------------------------------------------------------------------------------------------------------------------------------------------------------------------------------------------------------------------------------------------------------------------------------------------------------------------------------------------------------------------------------------------------------------------------------------------------------------------------------------------------------------------------------------------------------------------------------------------------------------|-------|
|  |          | -2.41 | -5.26 | phosphorus (Dular; 1μM Pi; root) vs phosphorus (Pusa Basmati 1; 1μM Pi; root) | Root samples of 15-day-old Dular seedlings grown in a phosphate deficient nutrient solution (1μM Pi); the solution (pH 5.5) was exchanged every 24h. Other growth conditions: growth chamber, 16h light (250-300μmol photons m <sup>-2</sup> s <sup>-1</sup> ) at 30°C / 8h darkness at 28°C cycles, 70% relative humidity. The nutrient solution as described in (Yoshida et al., 1976, Laboratory Manual for Physiological Studies of Rice, Ed 3, International Rice Research Institute, Manila, Philippines). | Dular | Traditional <i>Oryza sativa</i> ssp. indica variety with very low yield potential (7-22q/ha) and high tolerance to low phosphate (Pi) content in the soil. Dular is more efficient in Pi utilization and better preserves root growth under Pi-limiting conditions than a low Pi-sensitive variety, Pusa Basmati 1. When plants were grown under low Pi (1μM) for 15 days, Dular root length was 9.38 ± 0.17cm while Pusa Basmati 1 root length was 7.41 ± 0.15cm. Under low Pi, Dular produced more and longer lateral roots than Pusa Basmati 1. Even though under sufficient Pi root and shoot Pi content was lower in Dular than in Pusa Basmati 1, under low Pi root and shoot Pi content was higher in Dular than in Pusa Basmati 1 (Mehra et al., 2016, Front Plant Sci. 6: 1184). Dular belongs to wide-compatibility variety (WCV) rice germplasm, i.e. Dular is able to produce fertile hybrids when crossed to indica or japonica varieties (Wang et al., 1998, Theor Appl Genet. 97: 407). | shoot |
|  | OS-00239 | -1.73 | -3.26 | phosphorus (Dular; 1μM Pi; root) vs phosphorus (Pusa Basmati 1; 1μM Pi; root) | Root samples of 15-day-old Dular seedlings grown in a phosphate deficient nutrient solution (1μM Pi); the solution (pH 5.5) was exchanged every 24h. Other growth conditions: growth chamber, 16h light (250-300μmol photons m <sup>-2</sup> s <sup>-1</sup> ) at 30°C / 8h darkness at 28°C cycles, 70% relative humidity. The nutrient solution as described in (Yoshida et al., 1976, Laboratory Manual for Physiological Studies of Rice, Ed 3, International Rice Research Institute, Manila, Philippines). | Dular | Traditional <i>Oryza sativa</i> ssp. indica variety with very low yield potential (7-22q/ha) and high tolerance to low phosphate (Pi) content in the soil. Dular is more efficient in Pi utilization and better preserves root growth under Pi-limiting conditions than a low Pi-sensitive variety, Pusa Basmati 1. When plants were grown under low Pi (1μM) for 15 days, Dular root length was 9.38 ± 0.17cm while Pusa Basmati 1 root length was 7.41 ± 0.15cm. Under low Pi, Dular produced more and longer lateral roots than Pusa Basmati 1. Even though under sufficient Pi root and shoot Pi content was lower in Dular than in Pusa Basmati 1, under low Pi root and shoot Pi content was higher in Dular than in Pusa Basmati 1 (Mehra et al., 2016, Front Plant Sci. 6: 1184). Dular belongs to wide-compatibility variety (WCV) rice germplasm, i.e. Dular is able to produce fertile hybrids when crossed to indica or japonica varieties (Wang et al., 1998, Theor Appl Genet. 97: 407). | shoot |

|          |      |      |                                                                                               |                                                                                                                                                                                                                                                              |                  |                                                                                                                                                                                                                                                                                                                                                                                                                                                                                                                                                                                                                                                                                                                                                                                                                                                                                                                                                      |       |
|----------|------|------|-----------------------------------------------------------------------------------------------|--------------------------------------------------------------------------------------------------------------------------------------------------------------------------------------------------------------------------------------------------------------|------------------|------------------------------------------------------------------------------------------------------------------------------------------------------------------------------------------------------------------------------------------------------------------------------------------------------------------------------------------------------------------------------------------------------------------------------------------------------------------------------------------------------------------------------------------------------------------------------------------------------------------------------------------------------------------------------------------------------------------------------------------------------------------------------------------------------------------------------------------------------------------------------------------------------------------------------------------------------|-------|
| OS-00096 | 2.06 | 4.14 | phosphorus (35S::PSTOL1 (20); no P fertilizer) vs phosphorus (35S::PSTOL1 (20); 60kg/ha P2O5) | Root samples of 35S::PSTOL1 (20) line grown till the heading stage on phosphorus-deficient soil from Siniloan, Luzon, the Philippines (P-Bray, $1.23 \pm 0.30$ mgkg <sup>-1</sup> ; P-Olsen, $0.77 \pm 0.46$ mgkg <sup>-1</sup> ) under dry-down conditions. | 35S::PSTOL1 (20) | Phosphorus-starvation-tolerant transgenic line 20 (cv. IR64 background) carrying full-length coding region (CDS) of PSTOL1 under control of the constitutive CaMV35S promoter and NOS terminator. The PSTOL1 CDS is derived from <i>O. sativa indica</i> cultivar Kasalath. PSTOL1 (Phosphorus-starvation tolerance 1; OsPupK46-2) encodes a functional serine/threonine protein kinase and is absent in genomes of phosphorus-starvation-intolerant rice varieties such as IR64, Nipponbare. 35S::PSTOL1 (20) plants grown on phosphorus-unfertilized soil have larger root system and produce approx. 60% more seeds than the control IR64-null plants (segregants without the transgene). Compared to the non-transgenic IR64-null control, total root length and surface area of 35S::PSTOL1 (20) plants is increased not only under low-phosphorus but also under phosphorus-sufficient conditions (Gamuyao et al., 2012, Nature 488: 535-539). | roots |
|          | 1.6  | 3.02 | phosphorus (IR64-null; no P fertilizer) vs phosphorus (IR64-null; 60kg/ha P2O5)               | Root samples of IR64-null line grown till the heading stage on phosphorus-deficient soil from Siniloan, Luzon, the Philippines (P-Bray, $1.23 \pm 0.30$ mgkg <sup>-1</sup> ; P-Olsen, $0.77 \pm 0.46$ mgkg <sup>-1</sup> ) under dry-down conditions.        | IR64-null        | Non-transgenic, phosphorus-starvation-intolerant line from the segregating progeny of a transformant heterozygous for the 35S::PSTOL1 transgene; sibling of the transgenic 35S::PSTOL1 (20) line.                                                                                                                                                                                                                                                                                                                                                                                                                                                                                                                                                                                                                                                                                                                                                    | roots |

|          |      |      |                                                                            |                                                                                                                                                                                                                                                                                                                                                                                                                                                                                                                                                                          |            |                                                                                                                                                                                                                                                                                                                                                                                                                                                                                                                                                                                                                                                                                                                                                                                                                                                                                                                                                                                                                                                                                                                                                                                                                                                                                                                                                                                                                                                                                                                      |       |
|----------|------|------|----------------------------------------------------------------------------|--------------------------------------------------------------------------------------------------------------------------------------------------------------------------------------------------------------------------------------------------------------------------------------------------------------------------------------------------------------------------------------------------------------------------------------------------------------------------------------------------------------------------------------------------------------------------|------------|----------------------------------------------------------------------------------------------------------------------------------------------------------------------------------------------------------------------------------------------------------------------------------------------------------------------------------------------------------------------------------------------------------------------------------------------------------------------------------------------------------------------------------------------------------------------------------------------------------------------------------------------------------------------------------------------------------------------------------------------------------------------------------------------------------------------------------------------------------------------------------------------------------------------------------------------------------------------------------------------------------------------------------------------------------------------------------------------------------------------------------------------------------------------------------------------------------------------------------------------------------------------------------------------------------------------------------------------------------------------------------------------------------------------------------------------------------------------------------------------------------------------|-------|
| OS-00036 | 1.54 | 2.91 | iron (no Fe for 10d; root) vs untreated root samples (sufficient Fe and P) | <p>Root samples of cultivar Nipponbare germinated for 2 days in distilled water and then floated for 10 days on the Yoshida nutrient solution (Yoshida et al., 1976, Laboratory Manual for Physiological Studies of Rice, Ed 3. International Rice Research Institute, Manila, The Philippines) with optimal phosphorus (0.323mM NaH<sub>2</sub>PO<sub>4</sub>) concentration but lacking iron (FeCl<sub>3</sub>) and citric acid. Other growth conditions: growth chamber, 12h light (450μmol photons m<sup>-2</sup>s<sup>-1</sup>) at 30°C / 12h darkness at 22°C.</p> | Nipponbare | <p>Japonica (<i>Oryza sativa</i> ssp. japonica) variety resistant to infection by the plant <i>Striga hermonthica</i>, an obligate root hemiparasite (Swarbrick et al., 2008, <i>New Phytol.</i> 179: 515-529). Nipponbare is susceptible to <i>Xanthomonas oryzae</i> pv. <i>oryzae</i> strains BAI3 (from Burkina Faso), PXO99A (from the Philippines; race 6), PXO86 (from the Philippines; race 2), T7174 (from Japan; race 1), and MAI1 (from Mali). Nipponbare is well transformable with <i>Agrobacterium tumefaciens</i>: using <i>A. tumefaciens</i> strain EHA 105, transient transformation frequency has been found to be 85.2%, stable transformation frequency 53.52% (Tie et al., 2012, <i>Plant Mol. Biol.</i> 78: 1-18). Nipponbare is susceptible to <i>Meloidogyne graminicola</i>, a root knot nematode that induces re-differentiation of root cells into multinucleate giant cells and formation of hook-like galls. Nipponbare is susceptible to <i>Magnaporthe oryzae</i> isolate FR13 (virulent isolate from France) and resistant to <i>M. oryzae</i> isolates CL3.6.7 (avirulent isolate) and BR32 (nonadapted isolate from Brazil) (Abbruscato et al., 2012, <i>Mol Plant Pathol.</i>; Faivre-Rampant et al., 2008, <i>New Phytol.</i> 180: 899-910). This variety is sensitive to drought stress; drought index 0.54 (Wei et al., 2017, <i>Front Plant Sci.</i> 8: 473). Nipponbare is susceptible to Rice Stripe Virus (RSV) (Zhao et al., 2016, <i>New Phytol.</i> 210: 196-207).</p> | roots |
|----------|------|------|----------------------------------------------------------------------------|--------------------------------------------------------------------------------------------------------------------------------------------------------------------------------------------------------------------------------------------------------------------------------------------------------------------------------------------------------------------------------------------------------------------------------------------------------------------------------------------------------------------------------------------------------------------------|------------|----------------------------------------------------------------------------------------------------------------------------------------------------------------------------------------------------------------------------------------------------------------------------------------------------------------------------------------------------------------------------------------------------------------------------------------------------------------------------------------------------------------------------------------------------------------------------------------------------------------------------------------------------------------------------------------------------------------------------------------------------------------------------------------------------------------------------------------------------------------------------------------------------------------------------------------------------------------------------------------------------------------------------------------------------------------------------------------------------------------------------------------------------------------------------------------------------------------------------------------------------------------------------------------------------------------------------------------------------------------------------------------------------------------------------------------------------------------------------------------------------------------------|-------|

|                             |                         |                 |             |             |                                                                                   |                                                                                                                                                                                                                                                                                                                                                                                                                                                                                                                                                                          |                                                                                                                                                                                                                                                                                                                                                                                                                                                                                                                                                                                                                                                                                                                                                                                                                                                                                                                                                                                                                                                                                                                                                                                                                                                                                                                                                                                                                                                                                                                                        |              |
|-----------------------------|-------------------------|-----------------|-------------|-------------|-----------------------------------------------------------------------------------|--------------------------------------------------------------------------------------------------------------------------------------------------------------------------------------------------------------------------------------------------------------------------------------------------------------------------------------------------------------------------------------------------------------------------------------------------------------------------------------------------------------------------------------------------------------------------|----------------------------------------------------------------------------------------------------------------------------------------------------------------------------------------------------------------------------------------------------------------------------------------------------------------------------------------------------------------------------------------------------------------------------------------------------------------------------------------------------------------------------------------------------------------------------------------------------------------------------------------------------------------------------------------------------------------------------------------------------------------------------------------------------------------------------------------------------------------------------------------------------------------------------------------------------------------------------------------------------------------------------------------------------------------------------------------------------------------------------------------------------------------------------------------------------------------------------------------------------------------------------------------------------------------------------------------------------------------------------------------------------------------------------------------------------------------------------------------------------------------------------------------|--------------|
| <p>qRPU<sub>p</sub>E3.8</p> | <p>LOC_Os03g60220.1</p> | <p>OS-00030</p> | <p>1.36</p> | <p>2.57</p> | <p>iron (no Fe for 10d; root) vs iron; phosphorus (no Fe and P for 10d; root)</p> | <p>Root samples of cultivar Nipponbare germinated for 2 days in distilled water and then floated for 10 days on the Yoshida nutrient solution (Yoshida et al., 1976, Laboratory Manual for Physiological Studies of Rice, Ed 3. International Rice Research Institute, Manila, The Philippines) with optimal phosphorus (0.323mM NaH<sub>2</sub>PO<sub>4</sub>) concentration but lacking iron (FeCl<sub>3</sub>) and citric acid. Other growth conditions: growth chamber, 12h light (450μmol photons m<sup>-2</sup>s<sup>-1</sup>) at 30°C / 12h darkness at 22°C.</p> | <p>Nipponbare</p> <p>Japonica (<i>Oryza sativa</i> ssp. japonica) variety resistant to infection by the plant <i>Striga hermonthica</i>, an obligate root hemiparasite (Swarbrick et al., 2008, <i>New Phytol.</i> 179: 515-529). Nipponbare is susceptible to <i>Xanthomonas oryzae</i> pv. <i>oryzae</i> strains BAI3 (from Burkina Faso), PXO99A (from the Philippines; race 6), PXO86 (from the Philippines; race 2), T7174 (from Japan; race 1), and MAI1 (from Mali). Nipponbare is well transformable with <i>Agrobacterium tumefaciens</i>: using <i>A. tumefaciens</i> strain EHA 105, transient transformation frequency has been found to be 85.2%, stable transformation frequency 53.52% (Tie et al., 2012, <i>Plant Mol. Biol.</i> 78: 1-18). Nipponbare is susceptible to <i>Meloidogyne graminicola</i>, a root knot nematode that induces re-differentiation of root cells into multinucleate giant cells and formation of hook-like galls. Nipponbare is susceptible to <i>Magnaporthe oryzae</i> isolate FR13 (virulent isolate from France) and resistant to <i>M. oryzae</i> isolates CL3.6.7 (avirulent isolate) and BR32 (nonadapted isolate from Brazil) (Abbruscato et al., 2012, <i>Mol Plant Pathol.</i>; Faivre-Rampant et al., 2008, <i>New Phytol.</i> 180: 899-910). This variety is sensitive to drought stress; drought index 0.54 (Wei et al., 2017, <i>Front Plant Sci.</i> 8: 473). Nipponbare is susceptible to Rice Stripe Virus (RSV) (Zhao et al., 2016, <i>New Phytol.</i> 210: 196-207).</p> | <p>roots</p> |
|                             |                         |                 |             |             |                                                                                   |                                                                                                                                                                                                                                                                                                                                                                                                                                                                                                                                                                          |                                                                                                                                                                                                                                                                                                                                                                                                                                                                                                                                                                                                                                                                                                                                                                                                                                                                                                                                                                                                                                                                                                                                                                                                                                                                                                                                                                                                                                                                                                                                        |              |

|          |       |       |                                                                                   |                                                                                                                                                                                                                                                                                                                                                                                                                                                                                                                     |       |                                                                                                                                                                                                                                                                                                                                                                                                                                                                                                                                                                                                                                                                                                                                                                                                                                                                                                                                                                                                        |       |
|----------|-------|-------|-----------------------------------------------------------------------------------|---------------------------------------------------------------------------------------------------------------------------------------------------------------------------------------------------------------------------------------------------------------------------------------------------------------------------------------------------------------------------------------------------------------------------------------------------------------------------------------------------------------------|-------|--------------------------------------------------------------------------------------------------------------------------------------------------------------------------------------------------------------------------------------------------------------------------------------------------------------------------------------------------------------------------------------------------------------------------------------------------------------------------------------------------------------------------------------------------------------------------------------------------------------------------------------------------------------------------------------------------------------------------------------------------------------------------------------------------------------------------------------------------------------------------------------------------------------------------------------------------------------------------------------------------------|-------|
| OS-00239 | -1.14 | -2.18 | phosphorus (Dular; 1μM Pi; shoot) vs phosphorus (Pusa Basmati 1; 1μM Pi; shoot)   | Shoot samples of 15-day-old Dular seedlings grown in a phosphate deficient nutrient solution (1μM Pi); the solution (pH 5.5) was exchanged every 24h. Other growth conditions: growth chamber, 16h light (250-300μmol photons m <sup>-2</sup> s <sup>-1</sup> ) at 30°C / 8h darkness at 28°C cycles, 70% relative humidity. The nutrient solution as described in (Yoshida et al., 1976, Laboratory Manual for Physiological Studies of Rice, Ed 3, International Rice Research Institute, Manila, Philippines).   | Dular | Traditional <i>Oryza sativa</i> ssp. indica variety with very low yield potential (7-22q/ha) and high tolerance to low phosphate (Pi) content in the soil. Dular is more efficient in Pi utilization and better preserves root growth under Pi-limiting conditions than a low Pi-sensitive variety, Pusa Basmati 1. When plants were grown under low Pi (1μM) for 15 days, Dular root length was 9.38 ± 0.17cm while Pusa Basmati 1 root length was 7.41 ± 0.15cm. Under low Pi, Dular produced more and longer lateral roots than Pusa Basmati 1. Even though under sufficient Pi root and shoot Pi content was lower in Dular than in Pusa Basmati 1, under low Pi root and shoot Pi content was higher in Dular than in Pusa Basmati 1 (Mehra et al., 2016, Front Plant Sci. 6: 1184). Dular belongs to wide-compatibility variety (WCV) rice germplasm, i.e. Dular is able to produce fertile hybrids when crossed to indica or japonica varieties (Wang et al., 1998, Theor Appl Genet. 97: 407). | shoot |
|          | -1.36 | -2.63 | phosphorus (Dular; 320μM Pi; root) vs phosphorus (Pusa Basmati 1; 320μM Pi; root) | Root samples of 15-day-old Dular seedlings grown in a phosphate sufficient nutrient solution (320μM Pi); the solution (pH 5.5) was exchanged every 24h. Other growth conditions: growth chamber, 16h light (250-300μmol photons m <sup>-2</sup> s <sup>-1</sup> ) at 30°C / 8h darkness at 28°C cycles, 70% relative humidity. The nutrient solution as described in (Yoshida et al., 1976, Laboratory Manual for Physiological Studies of Rice, Ed 3, International Rice Research Institute, Manila, Philippines). | Dular | Traditional <i>Oryza sativa</i> ssp. indica variety with very low yield potential (7-22q/ha) and high tolerance to low phosphate (Pi) content in the soil. Dular is more efficient in Pi utilization and better preserves root growth under Pi-limiting conditions than a low Pi-sensitive variety, Pusa Basmati 1. When plants were grown under low Pi (1μM) for 15 days, Dular root length was 9.38 ± 0.17cm while Pusa Basmati 1 root length was 7.41 ± 0.15cm. Under low Pi, Dular produced more and longer lateral roots than Pusa Basmati 1. Even though under sufficient Pi root and shoot Pi content was lower in Dular than in Pusa Basmati 1, under low Pi root and shoot Pi content was higher in Dular than in Pusa Basmati 1 (Mehra et al., 2016, Front Plant Sci. 6: 1184). Dular belongs to wide-compatibility variety (WCV) rice germplasm, i.e. Dular is able to produce fertile hybrids when crossed to indica or japonica varieties (Wang et al., 1998, Theor Appl Genet. 97: 407). | roots |





|                  |          |       |       |                                                                                               |                                                                                                                                                                                                                                                                                                                                                                                                                                                                                                                        |                  |                                                                                                                                                                                                                                                                                                                                                                                                                                                                                                                                                                                                                                                                                                                                                                                                                                                                                                                                                                                                                                                                                                                                                                                                                                                                                                                                                                                                                                                                                                                    |       |
|------------------|----------|-------|-------|-----------------------------------------------------------------------------------------------|------------------------------------------------------------------------------------------------------------------------------------------------------------------------------------------------------------------------------------------------------------------------------------------------------------------------------------------------------------------------------------------------------------------------------------------------------------------------------------------------------------------------|------------------|--------------------------------------------------------------------------------------------------------------------------------------------------------------------------------------------------------------------------------------------------------------------------------------------------------------------------------------------------------------------------------------------------------------------------------------------------------------------------------------------------------------------------------------------------------------------------------------------------------------------------------------------------------------------------------------------------------------------------------------------------------------------------------------------------------------------------------------------------------------------------------------------------------------------------------------------------------------------------------------------------------------------------------------------------------------------------------------------------------------------------------------------------------------------------------------------------------------------------------------------------------------------------------------------------------------------------------------------------------------------------------------------------------------------------------------------------------------------------------------------------------------------|-------|
| LOC_Os03g60240.1 | OS-00036 | 1.24  | 2.35  | phosphorus (no P for 10d; shoot) vs untreated shoot samples (sufficient Fe and P)             | Shoot samples of cultivar Nipponbare germinated for 2 days in distilled water and then floated for 10 days on the Yoshida nutrient solution (Yoshida et al., 1976, Laboratory Manual for Physiological Studies of Rice, Ed 3. International Rice Research Institute, Manila, The Philippines) with optimal iron (0.036mM FeCl3) concentration but lacking phosphorus (NaH2PO4). Other growth conditions: growth chamber, 12h light (450 mmol photons m <sup>-2</sup> s <sup>-1</sup> ) at 30°C / 12h darkness at 22°C. | Nipponbare       | Japonica ( <i>Oryza sativa</i> ssp. japonica) variety resistant to infection by the plant <i>Striga hermonthica</i> , an obligate root hemiparasite (Swarbrick et al., 2008, <i>New Phytol.</i> 179: 515-529). Nipponbare is susceptible to <i>Xanthomonas oryzae</i> pv. <i>oryzae</i> strains BAI3 (from Burkina Faso), PXO99A (from the Philippines; race 6), PXO86 (from the Philippines; race 2), T7174 (from Japan; race 1), and MAI1 (from Mali). Nipponbare is well transformable with <i>Agrobacterium tumefaciens</i> : using <i>A. tumefaciens</i> strain EHA 105, transient transformation frequency has been found to be 85.2%, stable transformation frequency 53.52% (Tie et al., 2012, <i>Plant Mol. Biol.</i> 78: 1-18). Nipponbare is susceptible to <i>Meloidogyne graminicola</i> , a root knot nematode that induces re-differentiation of root cells into multinucleate giant cells and formation of hook-like galls. Nipponbare is susceptible to <i>Magnaporthe oryzae</i> isolate FR13 (virulent isolate from France) and resistant to <i>M. oryzae</i> isolates CL3.6.7 (avirulent isolate) and BR32 (nonadapted isolate from Brazil) (Abbruscato et al., 2012, <i>Mol Plant Pathol.</i> ; Faivre-Rampant et al., 2008, <i>New Phytol.</i> 180: 899-910). This variety is sensitive to drought stress; drought index 0.54 (Wei et al., 2017, <i>Front Plant Sci.</i> 8: 473). Nipponbare is susceptible to Rice Stripe Virus (RSV) (Zhao et al., 2016, <i>New Phytol.</i> 210: 196-207). | shoot |
|                  | OS-00096 | -1.05 | -2.07 | phosphorus (35S::PSTOL1 (20); no P fertilizer) vs phosphorus (35S::PSTOL1 (20); 60kg/ha P2O5) | Root samples of 35S::PSTOL1 (20) line grown till the heading stage on phosphorus-deficient soil from Siniloan, Luzon, the Philippines (P-Bray, 1.23 ± 0.30mgkg <sup>-1</sup> ; P-Olsen, 0.77 ± 0.46 mgkg <sup>-1</sup> ) under dry-down conditions.                                                                                                                                                                                                                                                                    | 35S::PSTOL1 (20) | Phosphorus-starvation-tolerant transgenic line 20 (cv. IR64 background) carrying full-length coding region (CDS) of PSTOL1 under control of the constitutive CaMV35S promoter and NOS terminator. The PSTOL1 CDS is derived from <i>O. sativa indica</i> cultivar Kasalath. PSTOL1 (Phosphorus-starvation tolerance 1; OsPupK46-2) encodes a functional serine/threonine protein kinase and is absent in genomes of phosphorus-starvation-intolerant rice varieties such as IR64, Nipponbare. 35S::PSTOL1 (20) plants grown on phosphorus-untreated soil have larger root system and produce approx. 60% more seeds than the control IR64-null plants (segregants without the transgene). Compared to the non-transgenic IR64-null control, total root length and surface area of 35S::PSTOL1 (20) plants is increased not only under low-phosphorus but also under phosphorus-sufficient conditions (Gamuyao et al., 2012, <i>Nature</i> 488: 535-539).                                                                                                                                                                                                                                                                                                                                                                                                                                                                                                                                                           | roots |

|                  |          |       |       |                                                                              |                                                                                                                                                                                                                                                                                                                                                                                                                                                                                                                                                                              |            |                                                                                                                                                                                                                                                                                                                                                                                                                                                                                                                                                                                                                                                                                                                                                                                                                                                                                                                                                                                                                                                                                                                                                                                                                                                                                                                                                                                                                                                                         |       |
|------------------|----------|-------|-------|------------------------------------------------------------------------------|------------------------------------------------------------------------------------------------------------------------------------------------------------------------------------------------------------------------------------------------------------------------------------------------------------------------------------------------------------------------------------------------------------------------------------------------------------------------------------------------------------------------------------------------------------------------------|------------|-------------------------------------------------------------------------------------------------------------------------------------------------------------------------------------------------------------------------------------------------------------------------------------------------------------------------------------------------------------------------------------------------------------------------------------------------------------------------------------------------------------------------------------------------------------------------------------------------------------------------------------------------------------------------------------------------------------------------------------------------------------------------------------------------------------------------------------------------------------------------------------------------------------------------------------------------------------------------------------------------------------------------------------------------------------------------------------------------------------------------------------------------------------------------------------------------------------------------------------------------------------------------------------------------------------------------------------------------------------------------------------------------------------------------------------------------------------------------|-------|
| LOC_Os03g60250.1 | OS-00036 | -1.01 | -2.01 | iron (no Fe for 10d; shoot) vs iron; phosphorus (no Fe and P for 10d; shoot) | Shoot samples of cultivar Nipponbare germinated for 2 days in distilled water and then floated for 10 days on the Yoshida nutrient solution (Yoshida et al., 1976, Laboratory Manual for Physiological Studies of Rice, Ed 3. International Rice Research Institute, Manila, The Philippines) with optimal phosphorus (0.323mM NaH <sub>2</sub> PO <sub>4</sub> ) concentration but lacking iron (FeCl <sub>3</sub> ) and citric acid. Other growth conditions: growth chamber, 12h light (450μmol photons m <sup>-2</sup> s <sup>-1</sup> ) at 30°C / 12h darkness at 22°C. | Nipponbare | Japonica ( <i>Oryza sativa</i> ssp. japonica) variety resistant to infection by the plant <i>Striga hermonthica</i> , an obligate root hemiparasite (Swarbrick et al., 2008, New Phytol. 179: 515-529). Nipponbare is susceptible to <i>Xanthomonas oryzae</i> pv. <i>oryzae</i> strains BAI3 (from Burkina Faso), PXO99A (from the Philippines; race 6), PXO86 (from the Philippines; race 2), T7174 (from Japan; race 1), and MAI1 (from Mali). Nipponbare is well transformable with <i>Agrobacterium tumefaciens</i> : using <i>A. tumefaciens</i> strain EHA 105, transient transformation frequency has been found to be 85.2%, stable transformation frequency 53.52% (Tie et al., 2012, Plant Mol. Biol. 78: 1-18). Nipponbare is susceptible to <i>Meloidogyne graminicola</i> , a root knot nematode that induces re-differentiation of root cells into multinucleate giant cells and formation of hook-like galls. Nipponbare is susceptible to <i>Magnaporthe oryzae</i> isolate FR13 (virulent isolate from France) and resistant to <i>M. oryzae</i> isolates CL3.6.7 (avirulent isolate) and BR32 (nonadapted isolate from Brazil) (Abbruscato et al., 2012, Mol Plant Pathol.; Faivre-Rampant et al., 2008, New Phytol. 180: 899-910). This variety is sensitive to drought stress; drought index 0.54 (Wei et al., 2017, Front Plant Sci. 8: 473). Nipponbare is susceptible to Rice Stripe Virus (RSV) (Zhao et al., 2016, New Phytol. 210: 196-207). | shoot |
|                  | OS-00003 | -1.05 | -2.03 | arsenate (Azucena) vs untreated root samples (Azucena)                       | Root samples of rice variety Azucena grown for 7 days in hydroponics on phosphate-free nutrient solution containing 0.1mM Mg <sup>2+</sup> and SO <sub>4</sub> <sup>2-</sup> , 0.2mM Ca <sup>2+</sup> and K <sup>+</sup> , 0.6mM NO <sub>3</sub> <sup>-</sup> , and 1ppm (13.3μM) arsenate (Na <sub>2</sub> HAsO <sub>4</sub> ).                                                                                                                                                                                                                                             | Azucena    | Traditional japonica ( <i>Oryza sativa</i> ssp. japonica) upland cultivar; origin: the Philippines. Azucena is resistant to aluminum stress (Al <sup>3+</sup> ) (Arbelaez et al., 2017, Plant Direct 1).                                                                                                                                                                                                                                                                                                                                                                                                                                                                                                                                                                                                                                                                                                                                                                                                                                                                                                                                                                                                                                                                                                                                                                                                                                                                | roots |

|  |          |     |      |                                                                          |                                                                                                                                                                                                                                                                                                                                                                                                                                                      |          |                                                                                                                                                                                                                                                                                                                                                                                                                                                                                                                                                                                                                                                                                                                                                                                                                                                                                                                                                                                                                                                                                                                                                                                                                                                   |       |
|--|----------|-----|------|--------------------------------------------------------------------------|------------------------------------------------------------------------------------------------------------------------------------------------------------------------------------------------------------------------------------------------------------------------------------------------------------------------------------------------------------------------------------------------------------------------------------------------------|----------|---------------------------------------------------------------------------------------------------------------------------------------------------------------------------------------------------------------------------------------------------------------------------------------------------------------------------------------------------------------------------------------------------------------------------------------------------------------------------------------------------------------------------------------------------------------------------------------------------------------------------------------------------------------------------------------------------------------------------------------------------------------------------------------------------------------------------------------------------------------------------------------------------------------------------------------------------------------------------------------------------------------------------------------------------------------------------------------------------------------------------------------------------------------------------------------------------------------------------------------------------|-------|
|  | OS-00282 | 1.4 | 2.63 | phosphorus (phr1/2/3; -Pi for 7d) vs phosphorus (Nipponbare; -Pi for 7d) | Shoot samples of phr1/2/3 plants grown hydroponically for 14 days in a nutrient solution (pH 5.5; Zhou et al., 2008, Plant Physiol. 146: 1673-1686) containing 200µM NaH <sub>2</sub> PO <sub>4</sub> (sufficient phosphate) and then transferred for 7 days into a solution lacking phosphate. Other conditions: greenhouse, 12h light (200µmol photons m <sup>-2</sup> s <sup>-1</sup> ) at 30°C / 12h dark at 22°C cycles, 60% relative humidity. | phr1/2/3 | Triple mutant (Nipponbare genetic background) with following mutations in OsPHR1, OsPHR2, OsPHR3 (PHOSPHATE STARVATION RESPONSE1, 2, 3): phr1, a 2bp deletion in the first translated exon of OsPHR1 (LOC_Os03g21240) resulting in a frameshift and a premature translation stop codon; phr2, a T-DNA insertion in OsPHR2 (LOC_Os07g25710); phr3, a Tos-17 retrotransposon insertion in the seventh translated exon of OsPHR3 (LOC_Os02g04640). The triple mutant was obtained by crossing single homozygous phr1, phr2 and phr3 mutants. OsPHR1, OsPHR2 and OsPHR3 are functionally redundant transcription factors involved in phosphate (Pi) signaling. Irrespective of Pi supply (low or sufficient), Pi concentration in phr1/2/3 shoots was lower than in shoots of Nipponbare wild type. Pi concentration in phr1/2/3 roots was only slightly lower than Pi concentration in wild type roots. Root and shoot biomass of phr1/2/3 was reduced compared to the wild type under both low Pi and sufficient Pi. Under Pi deficient conditions, root hairs of phr1/2/3 were much shorter than root hairs of the wild type (root hair length: phr1/2/3, approx. 40µm; wild type, approx. 175µm) (Guo et al., 2015, Plant Physiol. 168: 1762-76). | shoot |
|--|----------|-----|------|--------------------------------------------------------------------------|------------------------------------------------------------------------------------------------------------------------------------------------------------------------------------------------------------------------------------------------------------------------------------------------------------------------------------------------------------------------------------------------------------------------------------------------------|----------|---------------------------------------------------------------------------------------------------------------------------------------------------------------------------------------------------------------------------------------------------------------------------------------------------------------------------------------------------------------------------------------------------------------------------------------------------------------------------------------------------------------------------------------------------------------------------------------------------------------------------------------------------------------------------------------------------------------------------------------------------------------------------------------------------------------------------------------------------------------------------------------------------------------------------------------------------------------------------------------------------------------------------------------------------------------------------------------------------------------------------------------------------------------------------------------------------------------------------------------------------|-------|

|          |     |      |                                                                            |                                                                                                                                                                                                                                                                                                                                                                                                                                                                                                                                                                             |            |                                                                                                                                                                                                                                                                                                                                                                                                                                                                                                                                                                                                                                                                                                                                                                                                                                                                                                                                                                                                                                                                                                                                                                                                                                                                                                                                                                                                                                                                                                                    |       |
|----------|-----|------|----------------------------------------------------------------------------|-----------------------------------------------------------------------------------------------------------------------------------------------------------------------------------------------------------------------------------------------------------------------------------------------------------------------------------------------------------------------------------------------------------------------------------------------------------------------------------------------------------------------------------------------------------------------------|------------|--------------------------------------------------------------------------------------------------------------------------------------------------------------------------------------------------------------------------------------------------------------------------------------------------------------------------------------------------------------------------------------------------------------------------------------------------------------------------------------------------------------------------------------------------------------------------------------------------------------------------------------------------------------------------------------------------------------------------------------------------------------------------------------------------------------------------------------------------------------------------------------------------------------------------------------------------------------------------------------------------------------------------------------------------------------------------------------------------------------------------------------------------------------------------------------------------------------------------------------------------------------------------------------------------------------------------------------------------------------------------------------------------------------------------------------------------------------------------------------------------------------------|-------|
| OS-00036 | 1.3 | 2.47 | iron (no Fe for 10d; root) vs iron; phosphorus (no Fe and P for 10d; root) | Root samples of cultivar Nipponbare germinated for 2 days in distilled water and then floated for 10 days on the Yoshida nutrient solution (Yoshida et al., 1976, Laboratory Manual for Physiological Studies of Rice, Ed 3. International Rice Research Institute, Manila, The Philippines) with optimal phosphorus (0.323mM NaH <sub>2</sub> PO <sub>4</sub> ) concentration but lacking iron (FeCl <sub>3</sub> ) and citric acid. Other growth conditions: growth chamber, 12h light (450μmol photons m <sup>-2</sup> s <sup>-1</sup> ) at 30°C / 12h darkness at 22°C. | Nipponbare | Japonica ( <i>Oryza sativa</i> ssp. japonica) variety resistant to infection by the plant <i>Striga hermonthica</i> , an obligate root hemiparasite (Swarbrick et al., 2008, <i>New Phytol.</i> 179: 515-529). Nipponbare is susceptible to <i>Xanthomonas oryzae</i> pv. <i>oryzae</i> strains BAI3 (from Burkina Faso), PXO99A (from the Philippines; race 6), PXO86 (from the Philippines; race 2), T7174 (from Japan; race 1), and MAI1 (from Mali). Nipponbare is well transformable with <i>Agrobacterium tumefaciens</i> : using <i>A. tumefaciens</i> strain EHA 105, transient transformation frequency has been found to be 85.2%, stable transformation frequency 53.52% (Tie et al., 2012, <i>Plant Mol. Biol.</i> 78: 1-18). Nipponbare is susceptible to <i>Meloidogyne graminicola</i> , a root knot nematode that induces re-differentiation of root cells into multinucleate giant cells and formation of hook-like galls. Nipponbare is susceptible to <i>Magnaporthe oryzae</i> isolate FR13 (virulent isolate from France) and resistant to <i>M. oryzae</i> isolates CL3.6.7 (avirulent isolate) and BR32 (nonadapted isolate from Brazil) (Abbruscato et al., 2012, <i>Mol Plant Pathol.</i> ; Faivre-Rampant et al., 2008, <i>New Phytol.</i> 180: 899-910). This variety is sensitive to drought stress; drought index 0.54 (Wei et al., 2017, <i>Front Plant Sci.</i> 8: 473). Nipponbare is susceptible to Rice Stripe Virus (RSV) (Zhao et al., 2016, <i>New Phytol.</i> 210: 196-207). | roots |
|----------|-----|------|----------------------------------------------------------------------------|-----------------------------------------------------------------------------------------------------------------------------------------------------------------------------------------------------------------------------------------------------------------------------------------------------------------------------------------------------------------------------------------------------------------------------------------------------------------------------------------------------------------------------------------------------------------------------|------------|--------------------------------------------------------------------------------------------------------------------------------------------------------------------------------------------------------------------------------------------------------------------------------------------------------------------------------------------------------------------------------------------------------------------------------------------------------------------------------------------------------------------------------------------------------------------------------------------------------------------------------------------------------------------------------------------------------------------------------------------------------------------------------------------------------------------------------------------------------------------------------------------------------------------------------------------------------------------------------------------------------------------------------------------------------------------------------------------------------------------------------------------------------------------------------------------------------------------------------------------------------------------------------------------------------------------------------------------------------------------------------------------------------------------------------------------------------------------------------------------------------------------|-------|

|          |     |      |                                                                            |                                                                                                                                                                                                                                                                                                                                                                                                                                                                                                                                                                             |            |                                                                                                                                                                                                                                                                                                                                                                                                                                                                                                                                                                                                                                                                                                                                                                                                                                                                                                                                                                                                                                                                                                                                                                                                                                                                                                                                                                                                                                                                                                                    |       |
|----------|-----|------|----------------------------------------------------------------------------|-----------------------------------------------------------------------------------------------------------------------------------------------------------------------------------------------------------------------------------------------------------------------------------------------------------------------------------------------------------------------------------------------------------------------------------------------------------------------------------------------------------------------------------------------------------------------------|------------|--------------------------------------------------------------------------------------------------------------------------------------------------------------------------------------------------------------------------------------------------------------------------------------------------------------------------------------------------------------------------------------------------------------------------------------------------------------------------------------------------------------------------------------------------------------------------------------------------------------------------------------------------------------------------------------------------------------------------------------------------------------------------------------------------------------------------------------------------------------------------------------------------------------------------------------------------------------------------------------------------------------------------------------------------------------------------------------------------------------------------------------------------------------------------------------------------------------------------------------------------------------------------------------------------------------------------------------------------------------------------------------------------------------------------------------------------------------------------------------------------------------------|-------|
| OS-00036 | 1.2 | 2.28 | iron (no Fe for 10d; root) vs untreated root samples (sufficient Fe and P) | Root samples of cultivar Nipponbare germinated for 2 days in distilled water and then floated for 10 days on the Yoshida nutrient solution (Yoshida et al., 1976, Laboratory Manual for Physiological Studies of Rice, Ed 3. International Rice Research Institute, Manila, The Philippines) with optimal phosphorus (0.323mM NaH <sub>2</sub> PO <sub>4</sub> ) concentration but lacking iron (FeCl <sub>3</sub> ) and citric acid. Other growth conditions: growth chamber, 12h light (450μmol photons m <sup>-2</sup> s <sup>-1</sup> ) at 30°C / 12h darkness at 22°C. | Nipponbare | Japonica ( <i>Oryza sativa</i> ssp. japonica) variety resistant to infection by the plant <i>Striga hermonthica</i> , an obligate root hemiparasite (Swarbrick et al., 2008, <i>New Phytol.</i> 179: 515-529). Nipponbare is susceptible to <i>Xanthomonas oryzae</i> pv. <i>oryzae</i> strains BAI3 (from Burkina Faso), PXO99A (from the Philippines; race 6), PXO86 (from the Philippines; race 2), T7174 (from Japan; race 1), and MAI1 (from Mali). Nipponbare is well transformable with <i>Agrobacterium tumefaciens</i> : using <i>A. tumefaciens</i> strain EHA 105, transient transformation frequency has been found to be 85.2%, stable transformation frequency 53.52% (Tie et al., 2012, <i>Plant Mol. Biol.</i> 78: 1-18). Nipponbare is susceptible to <i>Meloidogyne graminicola</i> , a root knot nematode that induces re-differentiation of root cells into multinucleate giant cells and formation of hook-like galls. Nipponbare is susceptible to <i>Magnaporthe oryzae</i> isolate FR13 (virulent isolate from France) and resistant to <i>M. oryzae</i> isolates CL3.6.7 (avirulent isolate) and BR32 (nonadapted isolate from Brazil) (Abbruscato et al., 2012, <i>Mol Plant Pathol.</i> ; Faivre-Rampant et al., 2008, <i>New Phytol.</i> 180: 899-910). This variety is sensitive to drought stress; drought index 0.54 (Wei et al., 2017, <i>Front Plant Sci.</i> 8: 473). Nipponbare is susceptible to Rice Stripe Virus (RSV) (Zhao et al., 2016, <i>New Phytol.</i> 210: 196-207). | roots |
|----------|-----|------|----------------------------------------------------------------------------|-----------------------------------------------------------------------------------------------------------------------------------------------------------------------------------------------------------------------------------------------------------------------------------------------------------------------------------------------------------------------------------------------------------------------------------------------------------------------------------------------------------------------------------------------------------------------------|------------|--------------------------------------------------------------------------------------------------------------------------------------------------------------------------------------------------------------------------------------------------------------------------------------------------------------------------------------------------------------------------------------------------------------------------------------------------------------------------------------------------------------------------------------------------------------------------------------------------------------------------------------------------------------------------------------------------------------------------------------------------------------------------------------------------------------------------------------------------------------------------------------------------------------------------------------------------------------------------------------------------------------------------------------------------------------------------------------------------------------------------------------------------------------------------------------------------------------------------------------------------------------------------------------------------------------------------------------------------------------------------------------------------------------------------------------------------------------------------------------------------------------------|-------|

|  |                  |          |      |      |                                                                                 |                                                                                                                                                                                                                                                                                                                                                                                                                                                      |           |                                                                                                                                                                                                                                                                                                                                                                                                                                                                                                                                                                                                                                                                                                                                                                                                                                                                                                                                                                                                                                                                                                                                                                                                                                                   |       |
|--|------------------|----------|------|------|---------------------------------------------------------------------------------|------------------------------------------------------------------------------------------------------------------------------------------------------------------------------------------------------------------------------------------------------------------------------------------------------------------------------------------------------------------------------------------------------------------------------------------------------|-----------|---------------------------------------------------------------------------------------------------------------------------------------------------------------------------------------------------------------------------------------------------------------------------------------------------------------------------------------------------------------------------------------------------------------------------------------------------------------------------------------------------------------------------------------------------------------------------------------------------------------------------------------------------------------------------------------------------------------------------------------------------------------------------------------------------------------------------------------------------------------------------------------------------------------------------------------------------------------------------------------------------------------------------------------------------------------------------------------------------------------------------------------------------------------------------------------------------------------------------------------------------|-------|
|  |                  | OS-00282 | 1.2  | 2.3  | phosphorus (phr1/2/3; -Pi for 7d) vs phosphorus (phr3; -Pi for 7d)              | Shoot samples of phr1/2/3 plants grown hydroponically for 14 days in a nutrient solution (pH 5.5; Zhou et al., 2008, Plant Physiol. 146: 1673-1686) containing 200µM NaH <sub>2</sub> PO <sub>4</sub> (sufficient phosphate) and then transferred for 7 days into a solution lacking phosphate. Other conditions: greenhouse, 12h light (200µmol photons m <sup>-2</sup> s <sup>-1</sup> ) at 30°C / 12h dark at 22°C cycles, 60% relative humidity. | phr1/2/3  | Triple mutant (Nipponbare genetic background) with following mutations in OsPHR1, OsPHR2, OsPHR3 (PHOSPHATE STARVATION RESPONSE1, 2, 3): phr1, a 2bp deletion in the first translated exon of OsPHR1 (LOC_Os03g21240) resulting in a frameshift and a premature translation stop codon; phr2, a T-DNA insertion in OsPHR2 (LOC_Os07g25710); phr3, a Tos-17 retrotransposon insertion in the seventh translated exon of OsPHR3 (LOC_Os02g04640). The triple mutant was obtained by crossing single homozygous phr1, phr2 and phr3 mutants. OsPHR1, OsPHR2 and OsPHR3 are functionally redundant transcription factors involved in phosphate (Pi) signaling. Irrespective of Pi supply (low or sufficient), Pi concentration in phr1/2/3 shoots was lower than in shoots of Nipponbare wild type. Pi concentration in phr1/2/3 roots was only slightly lower than Pi concentration in wild type roots. Root and shoot biomass of phr1/2/3 was reduced compared to the wild type under both low Pi and sufficient Pi. Under Pi deficient conditions, root hairs of phr1/2/3 were much shorter than root hairs of the wild type (root hair length: phr1/2/3, approx. 40µm; wild type, approx. 175µm) (Guo et al., 2015, Plant Physiol. 168: 1762-76). | shoot |
|  | LOC_Os03g60279.1 |          |      |      |                                                                                 |                                                                                                                                                                                                                                                                                                                                                                                                                                                      |           |                                                                                                                                                                                                                                                                                                                                                                                                                                                                                                                                                                                                                                                                                                                                                                                                                                                                                                                                                                                                                                                                                                                                                                                                                                                   |       |
|  |                  |          | 2.08 | 4.29 | phosphorus (IR64-null; no P fertilizer) vs phosphorus (IR64-null; 60kg/ha P2O5) | Root samples of IR64-null line grown till the heading stage on phosphorus-deficient soil from Siniloan, Luzon, the Philippines (P-Bray, 1.23 ± 0.30mgkg <sup>-1</sup> ; P-Olsen, 0.77 ± 0.46 mgkg <sup>-1</sup> ) under dry-down conditions.                                                                                                                                                                                                         | IR64-null | Non-transgenic, phosphorus-starvation-intolerant line from the segregating progeny of a transformant heterozygous for the 35S::PSTOL1 transgene; sibling of the transgenic 35S::PSTOL1 (20) line.                                                                                                                                                                                                                                                                                                                                                                                                                                                                                                                                                                                                                                                                                                                                                                                                                                                                                                                                                                                                                                                 | roots |

|          |      |      |                                                                                               |                                                                                                                                                                                                                                                                                                                                                                                                                                                                                                                           |                  |                                                                                                                                                                                                                                                                                                                                                                                                                                                                                                                                                                                                                                                                                                                                                                                                                                                                                                                                                      |       |
|----------|------|------|-----------------------------------------------------------------------------------------------|---------------------------------------------------------------------------------------------------------------------------------------------------------------------------------------------------------------------------------------------------------------------------------------------------------------------------------------------------------------------------------------------------------------------------------------------------------------------------------------------------------------------------|------------------|------------------------------------------------------------------------------------------------------------------------------------------------------------------------------------------------------------------------------------------------------------------------------------------------------------------------------------------------------------------------------------------------------------------------------------------------------------------------------------------------------------------------------------------------------------------------------------------------------------------------------------------------------------------------------------------------------------------------------------------------------------------------------------------------------------------------------------------------------------------------------------------------------------------------------------------------------|-------|
| OS-00096 | 1.7  | 3.24 | phosphorus (35S::PSTOL1 (20); no P fertilizer) vs phosphorus (35S::PSTOL1 (20); 60kg/ha P2O5) | Root samples of 35S::PSTOL1 (20) line grown till the heading stage on phosphorus-deficient soil from Siniloan, Luzon, the Philippines (P-Bray, $1.23 \pm 0.30$ mgkg <sup>-1</sup> ; P-Olsen, $0.77 \pm 0.46$ mgkg <sup>-1</sup> ) under dry-down conditions.                                                                                                                                                                                                                                                              | 35S::PSTOL1 (20) | Phosphorus-starvation-tolerant transgenic line 20 (cv. IR64 background) carrying full-length coding region (CDS) of PSTOL1 under control of the constitutive CaMV35S promoter and NOS terminator. The PSTOL1 CDS is derived from <i>O. sativa indica</i> cultivar Kasalath. PSTOL1 (Phosphorus-starvation tolerance 1; OsPupK46-2) encodes a functional serine/threonine protein kinase and is absent in genomes of phosphorus-starvation-intolerant rice varieties such as IR64, Nipponbare. 35S::PSTOL1 (20) plants grown on phosphorus-unfertilized soil have larger root system and produce approx. 60% more seeds than the control IR64-null plants (segregants without the transgene). Compared to the non-transgenic IR64-null control, total root length and surface area of 35S::PSTOL1 (20) plants is increased not only under low-phosphorus but also under phosphorus-sufficient conditions (Gamuyao et al., 2012, Nature 488: 535-539). | roots |
| OS-00239 | 1.52 | 2.76 | phosphorus (Pusa Basmati 1; 1μM Pi; root) vs phosphorus (Pusa Basmati 1; 320μM Pi; root)      | Root samples of 15-day-old Pusa Basmati 1 seedlings grown in a phosphate deficient nutrient solution (1μM Pi); the solution (pH 5.5) was exchanged every 24h. Other growth conditions: growth chamber, 16h light (250-300μmol photons m <sup>-2</sup> s <sup>-1</sup> ) at 30°C / 8h darkness at 28°C cycles, 70% relative humidity. The nutrient solution as described in (Yoshida et al., 1976, Laboratory Manual for Physiological Studies of Rice, Ed 3, International Rice Research Institute, Manila, Philippines). | Pusa Basmati 1   | Semi-dwarf aromatic (Evolved Basmati) cultivar developed by The Indian Agricultural Research Institute (IARI), released in 1989. Low number of seeds (approx. 181) per panicle (Deshmukh et al., 2010, Funct Integr Genomics 10: 339-47). Pusa Basmati 1 is susceptible to Magnaporthe oryzae strain Mo-nwi-53 (Jain et al., 2017, Front Plant Sci. 8: 93). Pusa Basmati 1 is sensitive to low phosphate (Pi) content in the soil (Mehra et al., 2016, Front Plant Sci. 6: 1184).                                                                                                                                                                                                                                                                                                                                                                                                                                                                    | roots |

LOC\_Os04g50216.1

|          |       |       |                                                                            |                                                                                                                                                                                                                                                                                                                                                                                                                                                                                                                                                                             |            |                                                                                                                                                                                                                                                                                                                                                                                                                                                                                                                                                                                                                                                                                                                                                                                                                                                                                                                                                                                                                                                                                                                                                                                                                                                                                                                                                                                                                                                                         |       |
|----------|-------|-------|----------------------------------------------------------------------------|-----------------------------------------------------------------------------------------------------------------------------------------------------------------------------------------------------------------------------------------------------------------------------------------------------------------------------------------------------------------------------------------------------------------------------------------------------------------------------------------------------------------------------------------------------------------------------|------------|-------------------------------------------------------------------------------------------------------------------------------------------------------------------------------------------------------------------------------------------------------------------------------------------------------------------------------------------------------------------------------------------------------------------------------------------------------------------------------------------------------------------------------------------------------------------------------------------------------------------------------------------------------------------------------------------------------------------------------------------------------------------------------------------------------------------------------------------------------------------------------------------------------------------------------------------------------------------------------------------------------------------------------------------------------------------------------------------------------------------------------------------------------------------------------------------------------------------------------------------------------------------------------------------------------------------------------------------------------------------------------------------------------------------------------------------------------------------------|-------|
| OS-00036 | 1.29  | 2.54  | iron (no Fe for 10d; root) vs iron; phosphorus (no Fe and P for 10d; root) | Root samples of cultivar Nipponbare germinated for 2 days in distilled water and then floated for 10 days on the Yoshida nutrient solution (Yoshida et al., 1976, Laboratory Manual for Physiological Studies of Rice, Ed 3. International Rice Research Institute, Manila, The Philippines) with optimal phosphorus (0.323mM NaH <sub>2</sub> PO <sub>4</sub> ) concentration but lacking iron (FeCl <sub>3</sub> ) and citric acid. Other growth conditions: growth chamber, 12h light (450μmol photons m <sup>-2</sup> s <sup>-1</sup> ) at 30°C / 12h darkness at 22°C. | Nipponbare | Japonica ( <i>Oryza sativa</i> ssp. japonica) variety resistant to infection by the plant <i>Striga hermonthica</i> , an obligate root hemiparasite (Swarbrick et al., 2008, New Phytol. 179: 515-529). Nipponbare is susceptible to <i>Xanthomonas oryzae</i> pv. <i>oryzae</i> strains BAI3 (from Burkina Faso), PXO99A (from the Philippines; race 6), PXO86 (from the Philippines; race 2), T7174 (from Japan; race 1), and MAI1 (from Mali). Nipponbare is well transformable with <i>Agrobacterium tumefaciens</i> : using <i>A. tumefaciens</i> strain EHA 105, transient transformation frequency has been found to be 85.2%, stable transformation frequency 53.52% (Tie et al., 2012, Plant Mol. Biol. 78: 1-18). Nipponbare is susceptible to <i>Meloidogyne graminicola</i> , a root knot nematode that induces re-differentiation of root cells into multinucleate giant cells and formation of hook-like galls. Nipponbare is susceptible to <i>Magnaporthe oryzae</i> isolate FR13 (virulent isolate from France) and resistant to <i>M. oryzae</i> isolates CL3.6.7 (avirulent isolate) and BR32 (nonadapted isolate from Brazil) (Abbruscato et al., 2012, Mol Plant Pathol.; Faivre-Rampant et al., 2008, New Phytol. 180: 899-910). This variety is sensitive to drought stress; drought index 0.54 (Wei et al., 2017, Front Plant Sci. 8: 473). Nipponbare is susceptible to Rice Stripe Virus (RSV) (Zhao et al., 2016, New Phytol. 210: 196-207). | roots |
| OS-00003 | -1.05 | -2.05 | arsenate (Azucena) vs untreated root samples (Azucena)                     | Root samples of rice variety Azucena grown for 7 days in hydroponics on phosphate-free nutrient solution containing 0.1mM Mg <sup>2+</sup> and SO <sub>4</sub> <sup>2-</sup> , 0.2mM Ca <sup>2+</sup> and K <sup>+</sup> , 0.6mM NO <sub>3</sub> <sup>-</sup> , and 1ppm (13.3μM) arsenate (Na <sub>2</sub> HAsO <sub>4</sub> ).                                                                                                                                                                                                                                            | Azucena    | Traditional japonica ( <i>Oryza sativa</i> ssp. japonica) upland cultivar; origin: the Philippines. Azucena is resistant to aluminum stress (Al <sup>3+</sup> ) (Arbelaez et al., 2017, Plant Direct 1).                                                                                                                                                                                                                                                                                                                                                                                                                                                                                                                                                                                                                                                                                                                                                                                                                                                                                                                                                                                                                                                                                                                                                                                                                                                                | roots |



|                         |          |       |       |                                                                               |                                                                                                                                                                                                                                                                                                                                                                                                                                                                                                                  |       |                                                                                                                                                                                                                                                                                                                                                                                                                                                                                                                                                                                                                                                                                                                                                                                                                                                                                                                                                                                                         |       |
|-------------------------|----------|-------|-------|-------------------------------------------------------------------------------|------------------------------------------------------------------------------------------------------------------------------------------------------------------------------------------------------------------------------------------------------------------------------------------------------------------------------------------------------------------------------------------------------------------------------------------------------------------------------------------------------------------|-------|---------------------------------------------------------------------------------------------------------------------------------------------------------------------------------------------------------------------------------------------------------------------------------------------------------------------------------------------------------------------------------------------------------------------------------------------------------------------------------------------------------------------------------------------------------------------------------------------------------------------------------------------------------------------------------------------------------------------------------------------------------------------------------------------------------------------------------------------------------------------------------------------------------------------------------------------------------------------------------------------------------|-------|
|                         | OS-00239 | -1.24 | -2.3  | phosphorus (Dular; 1μM Pi; root) vs phosphorus (Pusa Basmati 1; 1μM Pi; root) | Root samples of 15-day-old Dular seedlings grown in a phosphate deficient nutrient solution (1μM Pi); the solution (pH 5.5) was exchanged every 24h. Other growth conditions: growth chamber, 16h light (250-300μmol photons m <sup>-2</sup> s <sup>-1</sup> ) at 30°C / 8h darkness at 28°C cycles, 70% relative humidity. The nutrient solution as described in (Yoshida et al., 1976, Laboratory Manual for Physiological Studies of Rice, Ed 3, International Rice Research Institute, Manila, Philippines). | Dular | Traditional <i>Oryza sativa</i> ssp. indica variety with very low yield potential (7-22q/ha) and high tolerance to low phosphate (Pi) content in the soil. Dular is more efficient in Pi utilization and better preserves root growth under Pi-limiting conditions than a low Pi-sensitive variety, Pusa Basmati 1. When plants were grown under low Pi (1μM) for 15 days, Dular root length was 9.38 ± 0.17cm while Pusa Basmati 1 root length was 7.41 ± 0.15cm. Under low Pi, Dular produced more and longer lateral roots than Pusa Basmati 1. Even though under sufficient Pi root and shoot Pi content was lower in Dular than in Pusa Basmati 1, under low Pi root and shoot Pi content was higher in Dular than in Pusa Basmati 1 (Mehra et al., 2016, Front Plant Sci. 6: 1184). Dular belongs to wide-compatibility variety (WCV) rice germplasms, i.e. Dular is able to produce fertile hybrids when crossed to indica or japonica varieties (Wang et al., 1998, Theor Appl Genet. 97: 407). | roots |
| <i>LOC_Os04g50660.1</i> |          |       |       |                                                                               |                                                                                                                                                                                                                                                                                                                                                                                                                                                                                                                  |       |                                                                                                                                                                                                                                                                                                                                                                                                                                                                                                                                                                                                                                                                                                                                                                                                                                                                                                                                                                                                         |       |
| <i>LOC_Os04g50680.1</i> |          |       |       |                                                                               |                                                                                                                                                                                                                                                                                                                                                                                                                                                                                                                  |       |                                                                                                                                                                                                                                                                                                                                                                                                                                                                                                                                                                                                                                                                                                                                                                                                                                                                                                                                                                                                         |       |
| <i>LOC_Os04g50700.1</i> |          |       |       |                                                                               |                                                                                                                                                                                                                                                                                                                                                                                                                                                                                                                  |       |                                                                                                                                                                                                                                                                                                                                                                                                                                                                                                                                                                                                                                                                                                                                                                                                                                                                                                                                                                                                         |       |
| <i>LOC_Os04g50710.1</i> |          |       |       |                                                                               |                                                                                                                                                                                                                                                                                                                                                                                                                                                                                                                  |       |                                                                                                                                                                                                                                                                                                                                                                                                                                                                                                                                                                                                                                                                                                                                                                                                                                                                                                                                                                                                         |       |
| <i>LOC_Os04g50720.1</i> | OS-00239 | -1.2  | -2.29 | phosphorus (Dular; 1μM Pi; root) vs phosphorus (Pusa Basmati 1; 1μM Pi; root) | Root samples of 15-day-old Dular seedlings grown in a phosphate deficient nutrient solution (1μM Pi); the solution (pH 5.5) was exchanged every 24h. Other growth conditions: growth chamber, 16h light (250-300μmol photons m <sup>-2</sup> s <sup>-1</sup> ) at 30°C / 8h darkness at 28°C cycles, 70% relative humidity. The nutrient solution as described in (Yoshida et al., 1976, Laboratory Manual for Physiological Studies of Rice, Ed 3, International Rice Research Institute, Manila, Philippines). | Dular | Traditional <i>Oryza sativa</i> ssp. indica variety with very low yield potential (7-22q/ha) and high tolerance to low phosphate (Pi) content in the soil. Dular is more efficient in Pi utilization and better preserves root growth under Pi-limiting conditions than a low Pi-sensitive variety, Pusa Basmati 1. When plants were grown under low Pi (1μM) for 15 days, Dular root length was 9.38 ± 0.17cm while Pusa Basmati 1 root length was 7.41 ± 0.15cm. Under low Pi, Dular produced more and longer lateral roots than Pusa Basmati 1. Even though under sufficient Pi root and shoot Pi content was lower in Dular than in Pusa Basmati 1, under low Pi root and shoot Pi content was higher in Dular than in Pusa Basmati 1 (Mehra et al., 2016, Front Plant Sci. 6: 1184). Dular belongs to wide-compatibility variety (WCV) rice germplasms, i.e. Dular is able to produce fertile hybrids when crossed to indica or japonica varieties (Wang et al., 1998, Theor Appl Genet. 97: 407). | roots |

qRPUPE4.9

|                  |          |      |      |                                                                                               |                                                                                                                                                                                                                                                                                                                                  |                  |                                                                                                                                                                                                                                                                                                                                                                                                                                                                                                                                                                                                                                                                                                                                                                                                                                                                                                                                                      |       |
|------------------|----------|------|------|-----------------------------------------------------------------------------------------------|----------------------------------------------------------------------------------------------------------------------------------------------------------------------------------------------------------------------------------------------------------------------------------------------------------------------------------|------------------|------------------------------------------------------------------------------------------------------------------------------------------------------------------------------------------------------------------------------------------------------------------------------------------------------------------------------------------------------------------------------------------------------------------------------------------------------------------------------------------------------------------------------------------------------------------------------------------------------------------------------------------------------------------------------------------------------------------------------------------------------------------------------------------------------------------------------------------------------------------------------------------------------------------------------------------------------|-------|
| LOC_Os04g50730.1 | OS-00096 | 1.3  | 2.05 | phosphorus (35S::PSTOL1 (20); no P fertilizer) vs phosphorus (35S::PSTOL1 (20); 60kg/ha P2O5) | Root samples of 35S::PSTOL1 (20) line grown till the heading stage on phosphorus-deficient soil from Siniloan, Luzon, the Philippines (P-Bray, $1.23 \pm 0.30$ mgkg <sup>-1</sup> ; P-Olsen, $0.77 \pm 0.46$ mgkg <sup>-1</sup> ) under dry-down conditions.                                                                     | 35S::PSTOL1 (20) | Phosphorus-starvation-tolerant transgenic line 20 (cv. IR64 background) carrying full-length coding region (CDS) of PSTOL1 under control of the constitutive CaMV35S promoter and NOS terminator. The PSTOL1 CDS is derived from <i>O. sativa indica</i> cultivar Kasalath. PSTOL1 (Phosphorus-starvation tolerance 1; OsPupK46-2) encodes a functional serine/threonine protein kinase and is absent in genomes of phosphorus-starvation-intolerant rice varieties such as IR64, Nipponbare. 35S::PSTOL1 (20) plants grown on phosphorus-unfertilized soil have larger root system and produce approx. 60% more seeds than the control IR64-null plants (segregants without the transgene). Compared to the non-transgenic IR64-null control, total root length and surface area of 35S::PSTOL1 (20) plants is increased not only under low-phosphorus but also under phosphorus-sufficient conditions (Gamuyao et al., 2012, Nature 488: 535-539). | roots |
|                  | OS-00003 | 1.46 | 2.76 | arsenate (Azucena) vs untreated root samples (Azucena)                                        | Root samples of rice variety Azucena grown for 7 days in hydroponics on phosphate-free nutrient solution containing 0.1mM Mg <sup>2+</sup> and SO <sub>4</sub> <sup>2-</sup> , 0.2mM Ca <sup>2+</sup> and K <sup>+</sup> , 0.6mM NO <sub>3</sub> <sup>-</sup> , and 1ppm (13.3μM) arsenate (Na <sub>2</sub> HAsO <sub>4</sub> ). | Azucena          | Traditional japonica ( <i>Oryza sativa ssp. japonica</i> ) upland cultivar; origin: the Philippines. Azucena is resistant to aluminum stress (Al <sup>3+</sup> ) (Arbelaez et al., 2017, Plant Direct 1).                                                                                                                                                                                                                                                                                                                                                                                                                                                                                                                                                                                                                                                                                                                                            | roots |
| LOC_Os04g50740.1 |          |      |      |                                                                                               |                                                                                                                                                                                                                                                                                                                                  |                  |                                                                                                                                                                                                                                                                                                                                                                                                                                                                                                                                                                                                                                                                                                                                                                                                                                                                                                                                                      |       |

|          |      |      |                                                                                               |                                                                                                                                                                                                                                                              |                  |                                                                                                                                                                                                                                                                                                                                                                                                                                                                                                                                                                                                                                                                                                                                                                                                                                                                                                                                                      |       |
|----------|------|------|-----------------------------------------------------------------------------------------------|--------------------------------------------------------------------------------------------------------------------------------------------------------------------------------------------------------------------------------------------------------------|------------------|------------------------------------------------------------------------------------------------------------------------------------------------------------------------------------------------------------------------------------------------------------------------------------------------------------------------------------------------------------------------------------------------------------------------------------------------------------------------------------------------------------------------------------------------------------------------------------------------------------------------------------------------------------------------------------------------------------------------------------------------------------------------------------------------------------------------------------------------------------------------------------------------------------------------------------------------------|-------|
| OS-00096 | 1.71 | 3.28 | phosphorus (35S::PSTOL1 (20); no P fertilizer) vs phosphorus (35S::PSTOL1 (20); 60kg/ha P2O5) | Root samples of 35S::PSTOL1 (20) line grown till the heading stage on phosphorus-deficient soil from Siniloan, Luzon, the Philippines (P-Bray, $1.23 \pm 0.30$ mgkg <sup>-1</sup> ; P-Olsen, $0.77 \pm 0.46$ mgkg <sup>-1</sup> ) under dry-down conditions. | 35S::PSTOL1 (20) | Phosphorus-starvation-tolerant transgenic line 20 (cv. IR64 background) carrying full-length coding region (CDS) of PSTOL1 under control of the constitutive CaMV35S promoter and NOS terminator. The PSTOL1 CDS is derived from <i>O. sativa indica</i> cultivar Kasalath. PSTOL1 (Phosphorus-starvation tolerance 1; OsPupK46-2) encodes a functional serine/threonine protein kinase and is absent in genomes of phosphorus-starvation-intolerant rice varieties such as IR64, Nipponbare. 35S::PSTOL1 (20) plants grown on phosphorus-unfertilized soil have larger root system and produce approx. 60% more seeds than the control IR64-null plants (segregants without the transgene). Compared to the non-transgenic IR64-null control, total root length and surface area of 35S::PSTOL1 (20) plants is increased not only under low-phosphorus but also under phosphorus-sufficient conditions (Gamuyao et al., 2012, Nature 488: 535-539). | roots |
|          | 1.21 | 2.32 | phosphorus (IR64-null; no P fertilizer) vs phosphorus (IR64-null; 60kg/ha P2O5)               | Root samples of IR64-null line grown till the heading stage on phosphorus-deficient soil from Siniloan, Luzon, the Philippines (P-Bray, $1.23 \pm 0.30$ mgkg <sup>-1</sup> ; P-Olsen, $0.77 \pm 0.46$ mgkg <sup>-1</sup> ) under dry-down conditions.        | IR64-null        | Non-transgenic, phosphorus-starvation-intolerant line from the segregating progeny of a transformant heterozygous for the 35S::PSTOL1 transgene; sibling of the transgenic 35S::PSTOL1 (20) line.                                                                                                                                                                                                                                                                                                                                                                                                                                                                                                                                                                                                                                                                                                                                                    | roots |

LOC\_Os04g50760.1

|  |       |       |                                                                                                                         |                                                                                                                                                                                                                                                                                                                                                                                                                                                                                                                          |            |                                                                                                                                                                                                                                                                                                                                                                                                                                                                                                                                                                                                                                                                                                                                                                                                                                                                                                                                                                                                                                                                                                                                                                                                                                                                                                                                                                                                                                                                                                                    |       |
|--|-------|-------|-------------------------------------------------------------------------------------------------------------------------|--------------------------------------------------------------------------------------------------------------------------------------------------------------------------------------------------------------------------------------------------------------------------------------------------------------------------------------------------------------------------------------------------------------------------------------------------------------------------------------------------------------------------|------------|--------------------------------------------------------------------------------------------------------------------------------------------------------------------------------------------------------------------------------------------------------------------------------------------------------------------------------------------------------------------------------------------------------------------------------------------------------------------------------------------------------------------------------------------------------------------------------------------------------------------------------------------------------------------------------------------------------------------------------------------------------------------------------------------------------------------------------------------------------------------------------------------------------------------------------------------------------------------------------------------------------------------------------------------------------------------------------------------------------------------------------------------------------------------------------------------------------------------------------------------------------------------------------------------------------------------------------------------------------------------------------------------------------------------------------------------------------------------------------------------------------------------|-------|
|  | -1.01 | -2.07 | iron;<br>phosphorus<br>(no Fe and P<br>for 10d;<br>root) vs<br>untreated<br>root<br>samples<br>(sufficient<br>Fe and P) | Root samples of cultivar Nipponbare germinated for 2 days in distilled water and then floated for 10 days on the Yoshida nutrient solution (Yoshida et al., 1976, Laboratory Manual for Physiological Studies of Rice, Ed 3. International Rice Research Institute, Manila, The Philippines) lacking iron (FeCl <sub>3</sub> ) and phosphorus (NaH <sub>2</sub> PO <sub>4</sub> ). Other growth conditions: growth chamber, 12h light (450μmol photons m <sup>-2</sup> s <sup>-1</sup> ) at 30°C / 12h darkness at 22°C. | Nipponbare | Japonica ( <i>Oryza sativa</i> ssp. japonica) variety resistant to infection by the plant <i>Striga hermonthica</i> , an obligate root hemiparasite (Swarbrick et al., 2008, <i>New Phytol.</i> 179: 515-529). Nipponbare is susceptible to <i>Xanthomonas oryzae</i> pv. <i>oryzae</i> strains BAI3 (from Burkina Faso), PXO99A (from the Philippines; race 6), PXO86 (from the Philippines; race 2), T7174 (from Japan; race 1), and MAI1 (from Mali). Nipponbare is well transformable with <i>Agrobacterium tumefaciens</i> : using <i>A. tumefaciens</i> strain EHA 105, transient transformation frequency has been found to be 85.2%, stable transformation frequency 53.52% (Tie et al., 2012, <i>Plant Mol. Biol.</i> 78: 1-18). Nipponbare is susceptible to <i>Meloidogyne graminicola</i> , a root knot nematode that induces re-differentiation of root cells into multinucleate giant cells and formation of hook-like galls. Nipponbare is susceptible to <i>Magnaporthe oryzae</i> isolate FR13 (virulent isolate from France) and resistant to <i>M. oryzae</i> isolates CL3.6.7 (avirulent isolate) and BR32 (nonadapted isolate from Brazil) (Abbruscato et al., 2012, <i>Mol Plant Pathol.</i> ; Faivre-Rampant et al., 2008, <i>New Phytol.</i> 180: 899-910). This variety is sensitive to drought stress; drought index 0.54 (Wei et al., 2017, <i>Front Plant Sci.</i> 8: 473). Nipponbare is susceptible to Rice Stripe Virus (RSV) (Zhao et al., 2016, <i>New Phytol.</i> 210: 196-207). | roots |
|--|-------|-------|-------------------------------------------------------------------------------------------------------------------------|--------------------------------------------------------------------------------------------------------------------------------------------------------------------------------------------------------------------------------------------------------------------------------------------------------------------------------------------------------------------------------------------------------------------------------------------------------------------------------------------------------------------------|------------|--------------------------------------------------------------------------------------------------------------------------------------------------------------------------------------------------------------------------------------------------------------------------------------------------------------------------------------------------------------------------------------------------------------------------------------------------------------------------------------------------------------------------------------------------------------------------------------------------------------------------------------------------------------------------------------------------------------------------------------------------------------------------------------------------------------------------------------------------------------------------------------------------------------------------------------------------------------------------------------------------------------------------------------------------------------------------------------------------------------------------------------------------------------------------------------------------------------------------------------------------------------------------------------------------------------------------------------------------------------------------------------------------------------------------------------------------------------------------------------------------------------------|-------|

|          |       |       |                                                                                 |                                                                                                                                                                                                                                                                                                                                                                                                                                                                                                                         |            |                                                                                                                                                                                                                                                                                                                                                                                                                                                                                                                                                                                                                                                                                                                                                                                                                                                                                                                                                                                                                                                                                                                                                                                                                                                                                                                                                                                                                                                                                                                      |       |
|----------|-------|-------|---------------------------------------------------------------------------------|-------------------------------------------------------------------------------------------------------------------------------------------------------------------------------------------------------------------------------------------------------------------------------------------------------------------------------------------------------------------------------------------------------------------------------------------------------------------------------------------------------------------------|------------|----------------------------------------------------------------------------------------------------------------------------------------------------------------------------------------------------------------------------------------------------------------------------------------------------------------------------------------------------------------------------------------------------------------------------------------------------------------------------------------------------------------------------------------------------------------------------------------------------------------------------------------------------------------------------------------------------------------------------------------------------------------------------------------------------------------------------------------------------------------------------------------------------------------------------------------------------------------------------------------------------------------------------------------------------------------------------------------------------------------------------------------------------------------------------------------------------------------------------------------------------------------------------------------------------------------------------------------------------------------------------------------------------------------------------------------------------------------------------------------------------------------------|-------|
| OS-00036 | -1.07 | -2.17 | phosphorus (no P for 10d; root) vs untreated root samples (sufficient Fe and P) | <p>Root samples of cultivar Nipponbare germinated for 2 days in distilled water and then floated for 10 days on the Yoshida nutrient solution (Yoshida et al., 1976, Laboratory Manual for Physiological Studies of Rice, Ed 3. International Rice Research Institute, Manila, The Philippines) with optimal iron (0.036mM FeCl3) concentration but lacking phosphorus (NaH2PO4). Other growth conditions: growth chamber, 12h light (450µmol photons m<sup>-2</sup>s<sup>-1</sup>) at 30°C / 12h darkness at 22°C.</p> | Nipponbare | <p>Japonica (<i>Oryza sativa</i> ssp. japonica) variety resistant to infection by the plant <i>Striga hermonthica</i>, an obligate root hemiparasite (Swarbrick et al., 2008, <i>New Phytol.</i> 179: 515-529). Nipponbare is susceptible to <i>Xanthomonas oryzae</i> pv. <i>oryzae</i> strains BAI3 (from Burkina Faso), PXO99A (from the Philippines; race 6), PXO86 (from the Philippines; race 2), T7174 (from Japan; race 1), and MAI1 (from Mali). Nipponbare is well transformable with <i>Agrobacterium tumefaciens</i>: using <i>A. tumefaciens</i> strain EHA 105, transient transformation frequency has been found to be 85.2%, stable transformation frequency 53.52% (Tie et al., 2012, <i>Plant Mol. Biol.</i> 78: 1-18). Nipponbare is susceptible to <i>Meloidogyne graminicola</i>, a root knot nematode that induces re-differentiation of root cells into multinucleate giant cells and formation of hook-like galls. Nipponbare is susceptible to <i>Magnaporthe oryzae</i> isolate FR13 (virulent isolate from France) and resistant to <i>M. oryzae</i> isolates CL3.6.7 (avirulent isolate) and BR32 (nonadapted isolate from Brazil) (Abbruscato et al., 2012, <i>Mol Plant Pathol.</i>; Faivre-Rampant et al., 2008, <i>New Phytol.</i> 180: 899-910). This variety is sensitive to drought stress; drought index 0.54 (Wei et al., 2017, <i>Front Plant Sci.</i> 8: 473). Nipponbare is susceptible to Rice Stripe Virus (RSV) (Zhao et al., 2016, <i>New Phytol.</i> 210: 196-207).</p> | roots |
|----------|-------|-------|---------------------------------------------------------------------------------|-------------------------------------------------------------------------------------------------------------------------------------------------------------------------------------------------------------------------------------------------------------------------------------------------------------------------------------------------------------------------------------------------------------------------------------------------------------------------------------------------------------------------|------------|----------------------------------------------------------------------------------------------------------------------------------------------------------------------------------------------------------------------------------------------------------------------------------------------------------------------------------------------------------------------------------------------------------------------------------------------------------------------------------------------------------------------------------------------------------------------------------------------------------------------------------------------------------------------------------------------------------------------------------------------------------------------------------------------------------------------------------------------------------------------------------------------------------------------------------------------------------------------------------------------------------------------------------------------------------------------------------------------------------------------------------------------------------------------------------------------------------------------------------------------------------------------------------------------------------------------------------------------------------------------------------------------------------------------------------------------------------------------------------------------------------------------|-------|

|  |                         |  |  |  |                                                                            |                                                                                                                                                                                                                                                                                                                                                                                                                                                                                                                                                                             |            |                                                                                                                                                                                                                                                                                                                                                                                                                                                                                                                                                                                                                                                                                                                                                                                                                                                                                                                                                                                                                                                                                                                                                                                                                                                                                                                                                                                                                                                                                                                    |       |
|--|-------------------------|--|--|--|----------------------------------------------------------------------------|-----------------------------------------------------------------------------------------------------------------------------------------------------------------------------------------------------------------------------------------------------------------------------------------------------------------------------------------------------------------------------------------------------------------------------------------------------------------------------------------------------------------------------------------------------------------------------|------------|--------------------------------------------------------------------------------------------------------------------------------------------------------------------------------------------------------------------------------------------------------------------------------------------------------------------------------------------------------------------------------------------------------------------------------------------------------------------------------------------------------------------------------------------------------------------------------------------------------------------------------------------------------------------------------------------------------------------------------------------------------------------------------------------------------------------------------------------------------------------------------------------------------------------------------------------------------------------------------------------------------------------------------------------------------------------------------------------------------------------------------------------------------------------------------------------------------------------------------------------------------------------------------------------------------------------------------------------------------------------------------------------------------------------------------------------------------------------------------------------------------------------|-------|
|  |                         |  |  |  | iron (no Fe for 10d; root) vs untreated root samples (sufficient Fe and P) | Root samples of cultivar Nipponbare germinated for 2 days in distilled water and then floated for 10 days on the Yoshida nutrient solution (Yoshida et al., 1976, Laboratory Manual for Physiological Studies of Rice, Ed 3. International Rice Research Institute, Manila, The Philippines) with optimal phosphorus (0.323mM NaH <sub>2</sub> PO <sub>4</sub> ) concentration but lacking iron (FeCl <sub>3</sub> ) and citric acid. Other growth conditions: growth chamber, 12h light (450μmol photons m <sup>-2</sup> s <sup>-1</sup> ) at 30°C / 12h darkness at 22°C. | Nipponbare | Japonica ( <i>Oryza sativa</i> ssp. japonica) variety resistant to infection by the plant <i>Striga hermonthica</i> , an obligate root hemiparasite (Swarbrick et al., 2008, <i>New Phytol.</i> 179: 515-529). Nipponbare is susceptible to <i>Xanthomonas oryzae</i> pv. <i>oryzae</i> strains BAI3 (from Burkina Faso), PXO99A (from the Philippines; race 6), PXO86 (from the Philippines; race 2), T7174 (from Japan; race 1), and MAI1 (from Mali). Nipponbare is well transformable with <i>Agrobacterium tumefaciens</i> : using <i>A. tumefaciens</i> strain EHA 105, transient transformation frequency has been found to be 85.2%, stable transformation frequency 53.52% (Tie et al., 2012, <i>Plant Mol. Biol.</i> 78: 1-18). Nipponbare is susceptible to <i>Meloidogyne graminicola</i> , a root knot nematode that induces re-differentiation of root cells into multinucleate giant cells and formation of hook-like galls. Nipponbare is susceptible to <i>Magnaporthe oryzae</i> isolate FR13 (virulent isolate from France) and resistant to <i>M. oryzae</i> isolates CL3.6.7 (avirulent isolate) and BR32 (nonadapted isolate from Brazil) (Abbruscato et al., 2012, <i>Mol Plant Pathol.</i> ; Faivre-Rampant et al., 2008, <i>New Phytol.</i> 180: 899-910). This variety is sensitive to drought stress; drought index 0.54 (Wei et al., 2017, <i>Front Plant Sci.</i> 8: 473). Nipponbare is susceptible to Rice Stripe Virus (RSV) (Zhao et al., 2016, <i>New Phytol.</i> 210: 196-207). | roots |
|  | <u>LOC_Os05g29740.1</u> |  |  |  |                                                                            |                                                                                                                                                                                                                                                                                                                                                                                                                                                                                                                                                                             |            |                                                                                                                                                                                                                                                                                                                                                                                                                                                                                                                                                                                                                                                                                                                                                                                                                                                                                                                                                                                                                                                                                                                                                                                                                                                                                                                                                                                                                                                                                                                    |       |
|  | <u>LOC_Os05g29750.1</u> |  |  |  |                                                                            |                                                                                                                                                                                                                                                                                                                                                                                                                                                                                                                                                                             |            |                                                                                                                                                                                                                                                                                                                                                                                                                                                                                                                                                                                                                                                                                                                                                                                                                                                                                                                                                                                                                                                                                                                                                                                                                                                                                                                                                                                                                                                                                                                    |       |

|  |          |      |      |                                                                                                                                        |                                                                                                                                                                                                                                                                                                                                                                                                                                                                                                                       |            |                                                                                                                                                                                                                                                                                                                                                                                                                                                                                                                                                                                                                                                                                                                                                                                                                                                                                                                                                                                                                                                                                                                                                                                                                                                                                                                                                                                                                                                                            |       |
|--|----------|------|------|----------------------------------------------------------------------------------------------------------------------------------------|-----------------------------------------------------------------------------------------------------------------------------------------------------------------------------------------------------------------------------------------------------------------------------------------------------------------------------------------------------------------------------------------------------------------------------------------------------------------------------------------------------------------------|------------|----------------------------------------------------------------------------------------------------------------------------------------------------------------------------------------------------------------------------------------------------------------------------------------------------------------------------------------------------------------------------------------------------------------------------------------------------------------------------------------------------------------------------------------------------------------------------------------------------------------------------------------------------------------------------------------------------------------------------------------------------------------------------------------------------------------------------------------------------------------------------------------------------------------------------------------------------------------------------------------------------------------------------------------------------------------------------------------------------------------------------------------------------------------------------------------------------------------------------------------------------------------------------------------------------------------------------------------------------------------------------------------------------------------------------------------------------------------------------|-------|
|  | OS-00036 | 1.59 | 3.01 | <p>ron;<br/>phosphorus<br/>(no Fe and P<br/>for 10d;<br/>root) vs<br/>untreated<br/>root<br/>samples<br/>(sufficient<br/>Fe and P)</p> | <p>Root samples of cultivar Nipponbare germinated for 2 days in distilled water and then floated for 10 days on the Yoshida nutrient solution (Yoshida et al., 1976, Laboratory Manual for Physiological Studies of Rice, Ed 3. International Rice Research Institute, Manila, The Philippines) lacking iron (FeCl<sub>3</sub>) and phosphorus (NaH<sub>2</sub>PO<sub>4</sub>). Other growth conditions: growth chamber, 12h light (450μmol photons m<sup>-2</sup>s<sup>-1</sup>) at 30°C / 12h darkness at 22°C.</p> | Nipponbare | <p>Japonica (<i>Oryza sativa</i> ssp. japonica) variety resistant to infection by the plant <i>Striga hermonthica</i>, an obligate root hemiparasite (Swarbrick et al., 2008, New Phytol. 179: 515-529). Nipponbare is susceptible to <i>Xanthomonas oryzae</i> pv. <i>oryzae</i> strains BAI3 (from Burkina Faso), PXO99A (from the Philippines; race 6), PXO86 (from the Philippines; race 2), T7174 (from Japan; race 1), and MAI1 (from Mali). Nipponbare is well transformable with <i>Agrobacterium tumefaciens</i>: using <i>A. tumefaciens</i> strain EHA 105, transient transformation frequency has been found to be 85.2%, stable transformation frequency 53.52% (Tie et al., 2012, Plant Mol. Biol. 78: 1-18). Nipponbare is susceptible to <i>Meloidogyne graminicola</i>, a root knot nematode that induces re-differentiation of root cells into multinucleate giant cells and formation of hook-like galls. Nipponbare is susceptible to <i>Magnaporthe oryzae</i> isolate FR13 (virulent isolate from France) and resistant to <i>M. oryzae</i> isolates CL3.6.7 (avirulent isolate) and BR32 (nonadapted isolate from Brazil) (Abbruscato et al., 2012, Mol Plant Pathol.; Faivre-Rampant et al., 2008, New Phytol. 180: 899-910). This variety is sensitive to drought stress; drought index 0.54 (Wei et al., 2017, Front Plant Sci. 8: 473). Nipponbare is susceptible to Rice Stripe Virus (RSV) (Zhao et al., 2016, New Phytol. 210: 196-207).</p> | roots |
|--|----------|------|------|----------------------------------------------------------------------------------------------------------------------------------------|-----------------------------------------------------------------------------------------------------------------------------------------------------------------------------------------------------------------------------------------------------------------------------------------------------------------------------------------------------------------------------------------------------------------------------------------------------------------------------------------------------------------------|------------|----------------------------------------------------------------------------------------------------------------------------------------------------------------------------------------------------------------------------------------------------------------------------------------------------------------------------------------------------------------------------------------------------------------------------------------------------------------------------------------------------------------------------------------------------------------------------------------------------------------------------------------------------------------------------------------------------------------------------------------------------------------------------------------------------------------------------------------------------------------------------------------------------------------------------------------------------------------------------------------------------------------------------------------------------------------------------------------------------------------------------------------------------------------------------------------------------------------------------------------------------------------------------------------------------------------------------------------------------------------------------------------------------------------------------------------------------------------------------|-------|

|  |  |  |                                                                                 |                                                                                                                                                                                                                                                                                                                                                                                                                                                                                                                         |            |                                                                                                                                                                                                                                                                                                                                                                                                                                                                                                                                                                                                                                                                                                                                                                                                                                                                                                                                                                                                                                                                                                                                                                                                                                                                                                                                                                                                                                                                                                                      |       |
|--|--|--|---------------------------------------------------------------------------------|-------------------------------------------------------------------------------------------------------------------------------------------------------------------------------------------------------------------------------------------------------------------------------------------------------------------------------------------------------------------------------------------------------------------------------------------------------------------------------------------------------------------------|------------|----------------------------------------------------------------------------------------------------------------------------------------------------------------------------------------------------------------------------------------------------------------------------------------------------------------------------------------------------------------------------------------------------------------------------------------------------------------------------------------------------------------------------------------------------------------------------------------------------------------------------------------------------------------------------------------------------------------------------------------------------------------------------------------------------------------------------------------------------------------------------------------------------------------------------------------------------------------------------------------------------------------------------------------------------------------------------------------------------------------------------------------------------------------------------------------------------------------------------------------------------------------------------------------------------------------------------------------------------------------------------------------------------------------------------------------------------------------------------------------------------------------------|-------|
|  |  |  | phosphorus (no P for 10d; root) vs untreated root samples (sufficient Fe and P) | <p>Root samples of cultivar Nipponbare germinated for 2 days in distilled water and then floated for 10 days on the Yoshida nutrient solution (Yoshida et al., 1976, Laboratory Manual for Physiological Studies of Rice, Ed 3. International Rice Research Institute, Manila, The Philippines) with optimal iron (0.036mM FeCl3) concentration but lacking phosphorus (NaH2PO4). Other growth conditions: growth chamber, 12h light (450μmol photons m<sup>-2</sup>s<sup>-1</sup>) at 30°C / 12h darkness at 22°C.</p> | Nipponbare | <p>Japonica (<i>Oryza sativa</i> ssp. japonica) variety resistant to infection by the plant <i>Striga hermonthica</i>, an obligate root hemiparasite (Swarbrick et al., 2008, <i>New Phytol.</i> 179: 515-529). Nipponbare is susceptible to <i>Xanthomonas oryzae</i> pv. <i>oryzae</i> strains BAI3 (from Burkina Faso), PXO99A (from the Philippines; race 6), PXO86 (from the Philippines; race 2), T7174 (from Japan; race 1), and MAI1 (from Mali). Nipponbare is well transformable with <i>Agrobacterium tumefaciens</i>: using <i>A. tumefaciens</i> strain EHA 105, transient transformation frequency has been found to be 85.2%, stable transformation frequency 53.52% (Tie et al., 2012, <i>Plant Mol. Biol.</i> 78: 1-18). Nipponbare is susceptible to <i>Meloidogyne graminicola</i>, a root knot nematode that induces re-differentiation of root cells into multinucleate giant cells and formation of hook-like galls. Nipponbare is susceptible to <i>Magnaporthe oryzae</i> isolate FR13 (virulent isolate from France) and resistant to <i>M. oryzae</i> isolates CL3.6.7 (avirulent isolate) and BR32 (nonadapted isolate from Brazil) (Abbruscato et al., 2012, <i>Mol Plant Pathol.</i>; Faivre-Rampant et al., 2008, <i>New Phytol.</i> 180: 899-910). This variety is sensitive to drought stress; drought index 0.54 (Wei et al., 2017, <i>Front Plant Sci.</i> 8: 473). Nipponbare is susceptible to Rice Stripe Virus (RSV) (Zhao et al., 2016, <i>New Phytol.</i> 210: 196-207).</p> | roots |
|--|--|--|---------------------------------------------------------------------------------|-------------------------------------------------------------------------------------------------------------------------------------------------------------------------------------------------------------------------------------------------------------------------------------------------------------------------------------------------------------------------------------------------------------------------------------------------------------------------------------------------------------------------|------------|----------------------------------------------------------------------------------------------------------------------------------------------------------------------------------------------------------------------------------------------------------------------------------------------------------------------------------------------------------------------------------------------------------------------------------------------------------------------------------------------------------------------------------------------------------------------------------------------------------------------------------------------------------------------------------------------------------------------------------------------------------------------------------------------------------------------------------------------------------------------------------------------------------------------------------------------------------------------------------------------------------------------------------------------------------------------------------------------------------------------------------------------------------------------------------------------------------------------------------------------------------------------------------------------------------------------------------------------------------------------------------------------------------------------------------------------------------------------------------------------------------------------|-------|



|  |  |  |                                                                                                                           |                                                                                                                                                                                                                                                                                                                                                                                                                                                                                                                       |            |                                                                                                                                                                                                                                                                                                                                                                                                                                                                                                                                                                                                                                                                                                                                                                                                                                                                                                                                                                                                                                                                                                                                                                                                                                                                                                                                                                                                                                                                                                                    |       |
|--|--|--|---------------------------------------------------------------------------------------------------------------------------|-----------------------------------------------------------------------------------------------------------------------------------------------------------------------------------------------------------------------------------------------------------------------------------------------------------------------------------------------------------------------------------------------------------------------------------------------------------------------------------------------------------------------|------------|--------------------------------------------------------------------------------------------------------------------------------------------------------------------------------------------------------------------------------------------------------------------------------------------------------------------------------------------------------------------------------------------------------------------------------------------------------------------------------------------------------------------------------------------------------------------------------------------------------------------------------------------------------------------------------------------------------------------------------------------------------------------------------------------------------------------------------------------------------------------------------------------------------------------------------------------------------------------------------------------------------------------------------------------------------------------------------------------------------------------------------------------------------------------------------------------------------------------------------------------------------------------------------------------------------------------------------------------------------------------------------------------------------------------------------------------------------------------------------------------------------------------|-------|
|  |  |  | iron;<br>phosphorus<br>(no Fe and P<br>for 10d;<br>shoot) vs<br>untreated<br>shoot<br>samples<br>(sufficient<br>Fe and P) | Shoot samples of cultivar Nipponbare germinated for 2 days in distilled water and then floated for 10 days on the Yoshida nutrient solution (Yoshida et al., 1976, Laboratory Manual for Physiological Studies of Rice, Ed 3. International Rice Research Institute, Manila, The Philippines) with optimal iron (0.036mM FeCl3) concentration but lacking phosphorus (NaH2PO4). Other growth conditions: growth chamber, 12h light (450μmol photons m <sup>-2</sup> s <sup>-1</sup> ) at 30°C / 12h darkness at 22°C. | Nipponbare | Japonica ( <i>Oryza sativa</i> ssp. japonica) variety resistant to infection by the plant <i>Striga hermonthica</i> , an obligate root hemiparasite (Swarbrick et al., 2008, <i>New Phytol.</i> 179: 515-529). Nipponbare is susceptible to <i>Xanthomonas oryzae</i> pv. <i>oryzae</i> strains BAI3 (from Burkina Faso), PXO99A (from the Philippines; race 6), PXO86 (from the Philippines; race 2), T7174 (from Japan; race 1), and MAI1 (from Mali). Nipponbare is well transformable with <i>Agrobacterium tumefaciens</i> : using <i>A. tumefaciens</i> strain EHA 105, transient transformation frequency has been found to be 85.2%, stable transformation frequency 53.52% (Tie et al., 2012, <i>Plant Mol. Biol.</i> 78: 1-18). Nipponbare is susceptible to <i>Meloidogyne graminicola</i> , a root knot nematode that induces re-differentiation of root cells into multinucleate giant cells and formation of hook-like galls. Nipponbare is susceptible to <i>Magnaporthe oryzae</i> isolate FR13 (virulent isolate from France) and resistant to <i>M. oryzae</i> isolates CL3.6.7 (avirulent isolate) and BR32 (nonadapted isolate from Brazil) (Abbruscato et al., 2012, <i>Mol Plant Pathol.</i> ; Faivre-Rampant et al., 2008, <i>New Phytol.</i> 180: 899-910). This variety is sensitive to drought stress; drought index 0.54 (Wei et al., 2017, <i>Front Plant Sci.</i> 8: 473). Nipponbare is susceptible to Rice Stripe Virus (RSV) (Zhao et al., 2016, <i>New Phytol.</i> 210: 196-207). | shoot |
|--|--|--|---------------------------------------------------------------------------------------------------------------------------|-----------------------------------------------------------------------------------------------------------------------------------------------------------------------------------------------------------------------------------------------------------------------------------------------------------------------------------------------------------------------------------------------------------------------------------------------------------------------------------------------------------------------|------------|--------------------------------------------------------------------------------------------------------------------------------------------------------------------------------------------------------------------------------------------------------------------------------------------------------------------------------------------------------------------------------------------------------------------------------------------------------------------------------------------------------------------------------------------------------------------------------------------------------------------------------------------------------------------------------------------------------------------------------------------------------------------------------------------------------------------------------------------------------------------------------------------------------------------------------------------------------------------------------------------------------------------------------------------------------------------------------------------------------------------------------------------------------------------------------------------------------------------------------------------------------------------------------------------------------------------------------------------------------------------------------------------------------------------------------------------------------------------------------------------------------------------|-------|

|                                           |  |  |      |      |                                                                                          |                                                                                                                                                                                                                                                                                                                                                                                                                                                                                                                          |            |                                                                                                                                                                                                                                                                                                                                                                                                                                                                                                                                                                                                                                                                                                                                                                                                                                                                                                                                                                                                                                                                                                                                                                                                                                                                                                                                                                                                                                                                                                                      |       |
|-------------------------------------------|--|--|------|------|------------------------------------------------------------------------------------------|--------------------------------------------------------------------------------------------------------------------------------------------------------------------------------------------------------------------------------------------------------------------------------------------------------------------------------------------------------------------------------------------------------------------------------------------------------------------------------------------------------------------------|------------|----------------------------------------------------------------------------------------------------------------------------------------------------------------------------------------------------------------------------------------------------------------------------------------------------------------------------------------------------------------------------------------------------------------------------------------------------------------------------------------------------------------------------------------------------------------------------------------------------------------------------------------------------------------------------------------------------------------------------------------------------------------------------------------------------------------------------------------------------------------------------------------------------------------------------------------------------------------------------------------------------------------------------------------------------------------------------------------------------------------------------------------------------------------------------------------------------------------------------------------------------------------------------------------------------------------------------------------------------------------------------------------------------------------------------------------------------------------------------------------------------------------------|-------|
| <p>qRPPUE5.10</p> <p>LOC_Os05g29760.1</p> |  |  | 1.05 | 2.07 | <p>phosphorus (no P for 10d; shoot) vs untreated shoot samples (sufficient Fe and P)</p> | <p>Shoot samples of cultivar Nipponbare germinated for 2 days in distilled water and then floated for 10 days on the Yoshida nutrient solution (Yoshida et al., 1976, Laboratory Manual for Physiological Studies of Rice, Ed 3. International Rice Research Institute, Manila, The Philippines) with optimal iron (0.036mM FeCl3) concentration but lacking phosphorus (NaH2PO4). Other growth conditions: growth chamber, 12h light (450 mmol photons m<sup>-2</sup>s<sup>-1</sup>) at 30°C / 12h darkness at 22°C</p> | Nipponbare | <p>Japonica (<i>Oryza sativa</i> ssp. japonica) variety resistant to infection by the plant <i>Striga hermonthica</i>, an obligate root hemiparasite (Swarbrick et al., 2008, <i>New Phytol.</i> 179: 515-529). Nipponbare is susceptible to <i>Xanthomonas oryzae</i> pv. <i>oryzae</i> strains BAI3 (from Burkina Faso), PXO99A (from the Philippines; race 6), PXO86 (from the Philippines; race 2), T7174 (from Japan; race 1), and MAI1 (from Mali). Nipponbare is well transformable with <i>Agrobacterium tumefaciens</i>: using <i>A. tumefaciens</i> strain EHA 105, transient transformation frequency has been found to be 85.2%, stable transformation frequency 53.52% (Tie et al., 2012, <i>Plant Mol. Biol.</i> 78: 1-18). Nipponbare is susceptible to <i>Meloidogyne graminicola</i>, a root knot nematode that induces re-differentiation of root cells into multinucleate giant cells and formation of hook-like galls. Nipponbare is susceptible to <i>Magnaporthe oryzae</i> isolate FR13 (virulent isolate from France) and resistant to <i>M. oryzae</i> isolates CL3.6.7 (avirulent isolate) and BR32 (nonadapted isolate from Brazil) (Abbruscato et al., 2012, <i>Mol Plant Pathol.</i>; Faivre-Rampant et al., 2008, <i>New Phytol.</i> 180: 899-910). This variety is sensitive to drought stress; drought index 0.54 (Wei et al., 2017, <i>Front Plant Sci.</i> 8: 473). Nipponbare is susceptible to Rice Stripe Virus (RSV) (Zhao et al., 2016, <i>New Phytol.</i> 210: 196-207).</p> | shoot |
|                                           |  |  |      |      |                                                                                          |                                                                                                                                                                                                                                                                                                                                                                                                                                                                                                                          |            |                                                                                                                                                                                                                                                                                                                                                                                                                                                                                                                                                                                                                                                                                                                                                                                                                                                                                                                                                                                                                                                                                                                                                                                                                                                                                                                                                                                                                                                                                                                      |       |

|          |       |       |                                                                                   |                                                                                                                                                                                                                                                                                                                                                                                                                                                                                                                     |       |                                                                                                                                                                                                                                                                                                                                                                                                                                                                                                                                                                                                                                                                                                                                                                                                                                                                                                                                                                                                        |       |
|----------|-------|-------|-----------------------------------------------------------------------------------|---------------------------------------------------------------------------------------------------------------------------------------------------------------------------------------------------------------------------------------------------------------------------------------------------------------------------------------------------------------------------------------------------------------------------------------------------------------------------------------------------------------------|-------|--------------------------------------------------------------------------------------------------------------------------------------------------------------------------------------------------------------------------------------------------------------------------------------------------------------------------------------------------------------------------------------------------------------------------------------------------------------------------------------------------------------------------------------------------------------------------------------------------------------------------------------------------------------------------------------------------------------------------------------------------------------------------------------------------------------------------------------------------------------------------------------------------------------------------------------------------------------------------------------------------------|-------|
| OS-00239 | 1.01  | 2.01  | phosphorus (Dular; 320μM Pi; root) vs phosphorus (Pusa Basmati 1; 320μM Pi; root) | Root samples of 15-day-old Dular seedlings grown in a phosphate sufficient nutrient solution (320μM Pi); the solution (pH 5.5) was exchanged every 24h. Other growth conditions: growth chamber, 16h light (250-300μmol photons m <sup>-2</sup> s <sup>-1</sup> ) at 30°C / 8h darkness at 28°C cycles, 70% relative humidity. The nutrient solution as described in (Yoshida et al., 1976, Laboratory Manual for Physiological Studies of Rice, Ed 3, International Rice Research Institute, Manila, Philippines). | Dular | Traditional <i>Oryza sativa</i> ssp. indica variety with very low yield potential (7-22q/ha) and high tolerance to low phosphate (Pi) content in the soil. Dular is more efficient in Pi utilization and better preserves root growth under Pi-limiting conditions than a low Pi-sensitive variety, Pusa Basmati 1. When plants were grown under low Pi (1μM) for 15 days, Dular root length was 9.38 ± 0.17cm while Pusa Basmati 1 root length was 7.41 ± 0.15cm. Under low Pi, Dular produced more and longer lateral roots than Pusa Basmati 1. Even though under sufficient Pi root and shoot Pi content was lower in Dular than in Pusa Basmati 1, under low Pi root and shoot Pi content was higher in Dular than in Pusa Basmati 1 (Mehra et al., 2016, Front Plant Sci. 6: 1184). Dular belongs to wide-compatibility variety (WCV) rice germplasm, i.e. Dular is able to produce fertile hybrids when crossed to indica or japonica varieties (Wang et al., 1998, Theor Appl Genet. 97: 407). | roots |
|          | -1.11 | -2.15 | phosphorus (Dular; 1μM Pi; root) vs phosphorus (Dular; 320μM Pi; root)            | Root samples of 15-day-old Dular seedlings grown in a phosphate deficient nutrient solution (1μM Pi); the solution (pH 5.5) was exchanged every 24h. Other growth conditions: growth chamber, 16h light (250-300μmol photons m <sup>-2</sup> s <sup>-1</sup> ) at 30°C / 8h darkness at 28°C cycles, 70% relative humidity. The nutrient solution as described in (Yoshida et al., 1976, Laboratory Manual for Physiological Studies of Rice, Ed 3, International Rice Research Institute, Manila, Philippines).    | Dular | Traditional <i>Oryza sativa</i> ssp. indica variety with very low yield potential (7-22q/ha) and high tolerance to low phosphate (Pi) content in the soil. Dular is more efficient in Pi utilization and better preserves root growth under Pi-limiting conditions than a low Pi-sensitive variety, Pusa Basmati 1. When plants were grown under low Pi (1μM) for 15 days, Dular root length was 9.38 ± 0.17cm while Pusa Basmati 1 root length was 7.41 ± 0.15cm. Under low Pi, Dular produced more and longer lateral roots than Pusa Basmati 1. Even though under sufficient Pi root and shoot Pi content was lower in Dular than in Pusa Basmati 1, under low Pi root and shoot Pi content was higher in Dular than in Pusa Basmati 1 (Mehra et al., 2016, Front Plant Sci. 6: 1184). Dular belongs to wide-compatibility variety (WCV) rice germplasm, i.e. Dular is able to produce fertile hybrids when crossed to indica or japonica varieties (Wang et al., 1998, Theor Appl Genet. 97: 407). | roots |

|          |       |       |                                                                              |                                                                                                                                                                                                                                                                                                                                                                                                                                                                                                                                                                              |            |                                                                                                                                                                                                                                                                                                                                                                                                                                                                                                                                                                                                                                                                                                                                                                                                                                                                                                                                                                                                                                                                                                                                                                                                                                                                                                                                                                                                                                                                                                                    |       |
|----------|-------|-------|------------------------------------------------------------------------------|------------------------------------------------------------------------------------------------------------------------------------------------------------------------------------------------------------------------------------------------------------------------------------------------------------------------------------------------------------------------------------------------------------------------------------------------------------------------------------------------------------------------------------------------------------------------------|------------|--------------------------------------------------------------------------------------------------------------------------------------------------------------------------------------------------------------------------------------------------------------------------------------------------------------------------------------------------------------------------------------------------------------------------------------------------------------------------------------------------------------------------------------------------------------------------------------------------------------------------------------------------------------------------------------------------------------------------------------------------------------------------------------------------------------------------------------------------------------------------------------------------------------------------------------------------------------------------------------------------------------------------------------------------------------------------------------------------------------------------------------------------------------------------------------------------------------------------------------------------------------------------------------------------------------------------------------------------------------------------------------------------------------------------------------------------------------------------------------------------------------------|-------|
| OS-00036 | -1.47 | -2.77 | iron (no Fe for 10d; shoot) vs iron; phosphorus (no Fe and P for 10d; shoot) | Shoot samples of cultivar Nipponbare germinated for 2 days in distilled water and then floated for 10 days on the Yoshida nutrient solution (Yoshida et al., 1976, Laboratory Manual for Physiological Studies of Rice, Ed 3. International Rice Research Institute, Manila, The Philippines) with optimal phosphorus (0.323mM NaH <sub>2</sub> PO <sub>4</sub> ) concentration but lacking iron (FeCl <sub>3</sub> ) and citric acid. Other growth conditions: growth chamber, 12h light (450μmol photons m <sup>-2</sup> s <sup>-1</sup> ) at 30°C / 12h darkness at 22°C. | Nipponbare | Japonica ( <i>Oryza sativa</i> ssp. japonica) variety resistant to infection by the plant <i>Striga hermonthica</i> , an obligate root hemiparasite (Swarbrick et al., 2008, <i>New Phytol.</i> 179: 515-529). Nipponbare is susceptible to <i>Xanthomonas oryzae</i> pv. <i>oryzae</i> strains BAI3 (from Burkina Faso), PXO99A (from the Philippines; race 6), PXO86 (from the Philippines; race 2), T7174 (from Japan; race 1), and MAI1 (from Mali). Nipponbare is well transformable with <i>Agrobacterium tumefaciens</i> : using <i>A. tumefaciens</i> strain EHA 105, transient transformation frequency has been found to be 85.2%, stable transformation frequency 53.52% (Tie et al., 2012, <i>Plant Mol. Biol.</i> 78: 1-18). Nipponbare is susceptible to <i>Meloidogyne graminicola</i> , a root knot nematode that induces re-differentiation of root cells into multinucleate giant cells and formation of hook-like galls. Nipponbare is susceptible to <i>Magnaporthe oryzae</i> isolate FR13 (virulent isolate from France) and resistant to <i>M. oryzae</i> isolates CL3.6.7 (avirulent isolate) and BR32 (nonadapted isolate from Brazil) (Abbruscato et al., 2012, <i>Mol Plant Pathol.</i> ; Faivre-Rampant et al., 2008, <i>New Phytol.</i> 180: 899-910). This variety is sensitive to drought stress; drought index 0.54 (Wei et al., 2017, <i>Front Plant Sci.</i> 8: 473). Nipponbare is susceptible to Rice Stripe Virus (RSV) (Zhao et al., 2016, <i>New Phytol.</i> 210: 196-207). | shoot |
|----------|-------|-------|------------------------------------------------------------------------------|------------------------------------------------------------------------------------------------------------------------------------------------------------------------------------------------------------------------------------------------------------------------------------------------------------------------------------------------------------------------------------------------------------------------------------------------------------------------------------------------------------------------------------------------------------------------------|------------|--------------------------------------------------------------------------------------------------------------------------------------------------------------------------------------------------------------------------------------------------------------------------------------------------------------------------------------------------------------------------------------------------------------------------------------------------------------------------------------------------------------------------------------------------------------------------------------------------------------------------------------------------------------------------------------------------------------------------------------------------------------------------------------------------------------------------------------------------------------------------------------------------------------------------------------------------------------------------------------------------------------------------------------------------------------------------------------------------------------------------------------------------------------------------------------------------------------------------------------------------------------------------------------------------------------------------------------------------------------------------------------------------------------------------------------------------------------------------------------------------------------------|-------|

|  |                  |          |       |       |                                                                            |                                                                                                                                                                                                                                                                                                                                                                                                                                                                                                                                                                             |            |                                                                                                                                                                                                                                                                                                                                                                                                                                                                                                                                                                                                                                                                                                                                                                                                                                                                                                                                                                                                                                                                                                                                                                                                                                                                                                                                                                                                                                                                                                                    |       |
|--|------------------|----------|-------|-------|----------------------------------------------------------------------------|-----------------------------------------------------------------------------------------------------------------------------------------------------------------------------------------------------------------------------------------------------------------------------------------------------------------------------------------------------------------------------------------------------------------------------------------------------------------------------------------------------------------------------------------------------------------------------|------------|--------------------------------------------------------------------------------------------------------------------------------------------------------------------------------------------------------------------------------------------------------------------------------------------------------------------------------------------------------------------------------------------------------------------------------------------------------------------------------------------------------------------------------------------------------------------------------------------------------------------------------------------------------------------------------------------------------------------------------------------------------------------------------------------------------------------------------------------------------------------------------------------------------------------------------------------------------------------------------------------------------------------------------------------------------------------------------------------------------------------------------------------------------------------------------------------------------------------------------------------------------------------------------------------------------------------------------------------------------------------------------------------------------------------------------------------------------------------------------------------------------------------|-------|
|  |                  | OS 00030 | -2.09 | -4.27 | iron (no Fe for 10d; root) vs iron; phosphorus (no Fe and P for 10d; root) | Root samples of cultivar Nipponbare germinated for 2 days in distilled water and then floated for 10 days on the Yoshida nutrient solution (Yoshida et al., 1976, Laboratory Manual for Physiological Studies of Rice, Ed 3. International Rice Research Institute, Manila, The Philippines) with optimal phosphorus (0.323mM NaH <sub>2</sub> PO <sub>4</sub> ) concentration but lacking iron (FeCl <sub>3</sub> ) and citric acid. Other growth conditions: growth chamber, 12h light (450μmol photons m <sup>-2</sup> s <sup>-1</sup> ) at 30°C / 12h darkness at 22°C. | Nipponbare | Japonica ( <i>Oryza sativa</i> ssp. japonica) variety resistant to infection by the plant <i>Striga hermonthica</i> , an obligate root hemiparasite (Swarbrick et al., 2008, <i>New Phytol.</i> 179: 515-529). Nipponbare is susceptible to <i>Xanthomonas oryzae</i> pv. <i>oryzae</i> strains BAI3 (from Burkina Faso), PXO99A (from the Philippines; race 6), PXO86 (from the Philippines; race 2), T7174 (from Japan; race 1), and MAI1 (from Mali). Nipponbare is well transformable with <i>Agrobacterium tumefaciens</i> : using <i>A. tumefaciens</i> strain EHA 105, transient transformation frequency has been found to be 85.2%, stable transformation frequency 53.52% (Tie et al., 2012, <i>Plant Mol. Biol.</i> 78: 1-18). Nipponbare is susceptible to <i>Meloidogyne graminicola</i> , a root knot nematode that induces re-differentiation of root cells into multinucleate giant cells and formation of hook-like galls. Nipponbare is susceptible to <i>Magnaporthe oryzae</i> isolate FR13 (virulent isolate from France) and resistant to <i>M. oryzae</i> isolates CL3.6.7 (avirulent isolate) and BR32 (nonadapted isolate from Brazil) (Abbruscato et al., 2012, <i>Mol Plant Pathol.</i> ; Faivre-Rampant et al., 2008, <i>New Phytol.</i> 180: 899-910). This variety is sensitive to drought stress; drought index 0.54 (Wei et al., 2017, <i>Front Plant Sci.</i> 8: 473). Nipponbare is susceptible to Rice Stripe Virus (RSV) (Zhao et al., 2016, <i>New Phytol.</i> 210: 196-207). | roots |
|  | LOC_Os05g31610.1 |          |       |       |                                                                            |                                                                                                                                                                                                                                                                                                                                                                                                                                                                                                                                                                             |            |                                                                                                                                                                                                                                                                                                                                                                                                                                                                                                                                                                                                                                                                                                                                                                                                                                                                                                                                                                                                                                                                                                                                                                                                                                                                                                                                                                                                                                                                                                                    |       |
|  |                  | OS-00003 | 3.91  | 15.27 | arsenate (Bala) vs untreated root samples (Bala)                           | Root samples of rice variety Bala grown for 7 days in hydroponics on phosphate-free nutrient solution containing 0.1mM Mg <sup>2+</sup> and SO <sub>4</sub> <sup>2-</sup> , 0.2mM Ca <sup>2+</sup> and K <sup>+</sup> , 0.6mM NO <sub>3</sub> <sup>-</sup> , and 1ppm (13.3μM) arsenate (Na <sub>2</sub> HAsO <sub>4</sub> ).                                                                                                                                                                                                                                               | Bala       | Improved indica upland cultivar; origin: Eastern India                                                                                                                                                                                                                                                                                                                                                                                                                                                                                                                                                                                                                                                                                                                                                                                                                                                                                                                                                                                                                                                                                                                                                                                                                                                                                                                                                                                                                                                             | roots |

|          |     |       |                                                                            |                                                                                                                                                                                                                                                                                                                                                                                                                                                                                                                                                                             |            |                                                                                                                                                                                                                                                                                                                                                                                                                                                                                                                                                                                                                                                                                                                                                                                                                                                                                                                                                                                                                                                                                                                                                                                                                                                                                                                                                                                                                                                                                                                    |       |
|----------|-----|-------|----------------------------------------------------------------------------|-----------------------------------------------------------------------------------------------------------------------------------------------------------------------------------------------------------------------------------------------------------------------------------------------------------------------------------------------------------------------------------------------------------------------------------------------------------------------------------------------------------------------------------------------------------------------------|------------|--------------------------------------------------------------------------------------------------------------------------------------------------------------------------------------------------------------------------------------------------------------------------------------------------------------------------------------------------------------------------------------------------------------------------------------------------------------------------------------------------------------------------------------------------------------------------------------------------------------------------------------------------------------------------------------------------------------------------------------------------------------------------------------------------------------------------------------------------------------------------------------------------------------------------------------------------------------------------------------------------------------------------------------------------------------------------------------------------------------------------------------------------------------------------------------------------------------------------------------------------------------------------------------------------------------------------------------------------------------------------------------------------------------------------------------------------------------------------------------------------------------------|-------|
| OS-00036 | 3.9 | 14.97 | iron (no Fe for 10d; root) vs untreated root samples (sufficient Fe and P) | Root samples of cultivar Nipponbare germinated for 2 days in distilled water and then floated for 10 days on the Yoshida nutrient solution (Yoshida et al., 1976, Laboratory Manual for Physiological Studies of Rice, Ed 3. International Rice Research Institute, Manila, The Philippines) with optimal phosphorus (0.323mM NaH <sub>2</sub> PO <sub>4</sub> ) concentration but lacking iron (FeCl <sub>3</sub> ) and citric acid. Other growth conditions: growth chamber, 12h light (450μmol photons m <sup>-2</sup> s <sup>-1</sup> ) at 30°C / 12h darkness at 22°C. | Nipponbare | Japonica ( <i>Oryza sativa</i> ssp. japonica) variety resistant to infection by the plant <i>Striga hermonthica</i> , an obligate root hemiparasite (Swarbrick et al., 2008, <i>New Phytol.</i> 179: 515-529). Nipponbare is susceptible to <i>Xanthomonas oryzae</i> pv. <i>oryzae</i> strains BAI3 (from Burkina Faso), PXO99A (from the Philippines; race 6), PXO86 (from the Philippines; race 2), T7174 (from Japan; race 1), and MAI1 (from Mali). Nipponbare is well transformable with <i>Agrobacterium tumefaciens</i> : using <i>A. tumefaciens</i> strain EHA 105, transient transformation frequency has been found to be 85.2%, stable transformation frequency 53.52% (Tie et al., 2012, <i>Plant Mol. Biol.</i> 78: 1-18). Nipponbare is susceptible to <i>Meloidogyne graminicola</i> , a root knot nematode that induces re-differentiation of root cells into multinucleate giant cells and formation of hook-like galls. Nipponbare is susceptible to <i>Magnaporthe oryzae</i> isolate FR13 (virulent isolate from France) and resistant to <i>M. oryzae</i> isolates CL3.6.7 (avirulent isolate) and BR32 (nonadapted isolate from Brazil) (Abbruscato et al., 2012, <i>Mol Plant Pathol.</i> ; Faivre-Rampant et al., 2008, <i>New Phytol.</i> 180: 899-910). This variety is sensitive to drought stress; drought index 0.54 (Wei et al., 2017, <i>Front Plant Sci.</i> 8: 473). Nipponbare is susceptible to Rice Stripe Virus (RSV) (Zhao et al., 2016, <i>New Phytol.</i> 210: 196-207). | roots |
|----------|-----|-------|----------------------------------------------------------------------------|-----------------------------------------------------------------------------------------------------------------------------------------------------------------------------------------------------------------------------------------------------------------------------------------------------------------------------------------------------------------------------------------------------------------------------------------------------------------------------------------------------------------------------------------------------------------------------|------------|--------------------------------------------------------------------------------------------------------------------------------------------------------------------------------------------------------------------------------------------------------------------------------------------------------------------------------------------------------------------------------------------------------------------------------------------------------------------------------------------------------------------------------------------------------------------------------------------------------------------------------------------------------------------------------------------------------------------------------------------------------------------------------------------------------------------------------------------------------------------------------------------------------------------------------------------------------------------------------------------------------------------------------------------------------------------------------------------------------------------------------------------------------------------------------------------------------------------------------------------------------------------------------------------------------------------------------------------------------------------------------------------------------------------------------------------------------------------------------------------------------------------|-------|

|  |      |      |                                                                           |                                                                                                                                                                                                                                                                                                                                                                                                                                                                                                                                                                          |            |                                                                                                                                                                                                                                                                                                                                                                                                                                                                                                                                                                                                                                                                                                                                                                                                                                                                                                                                                                                                                                                                                                                                                                                                                                                                                                                                                                                                                                                                                                                      |       |
|--|------|------|---------------------------------------------------------------------------|--------------------------------------------------------------------------------------------------------------------------------------------------------------------------------------------------------------------------------------------------------------------------------------------------------------------------------------------------------------------------------------------------------------------------------------------------------------------------------------------------------------------------------------------------------------------------|------------|----------------------------------------------------------------------------------------------------------------------------------------------------------------------------------------------------------------------------------------------------------------------------------------------------------------------------------------------------------------------------------------------------------------------------------------------------------------------------------------------------------------------------------------------------------------------------------------------------------------------------------------------------------------------------------------------------------------------------------------------------------------------------------------------------------------------------------------------------------------------------------------------------------------------------------------------------------------------------------------------------------------------------------------------------------------------------------------------------------------------------------------------------------------------------------------------------------------------------------------------------------------------------------------------------------------------------------------------------------------------------------------------------------------------------------------------------------------------------------------------------------------------|-------|
|  | 3.83 | 14.2 | iron (no Fe for 10d; root) vs ron; phosphorus (no Fe and P for 10d; root) | <p>Root samples of cultivar Nipponbare germinated for 2 days in distilled water and then floated for 10 days on the Yoshida nutrient solution (Yoshida et al., 1976, Laboratory Manual for Physiological Studies of Rice, Ed 3. International Rice Research Institute, Manila, The Philippines) with optimal phosphorus (0.323mM NaH<sub>2</sub>PO<sub>4</sub>) concentration but lacking iron (FeCl<sub>3</sub>) and citric acid. Other growth conditions: growth chamber, 12h light (450μmol photons m<sup>-2</sup>s<sup>-1</sup>) at 30°C / 12h darkness at 22°C.</p> | Nipponbare | <p>Japonica (<i>Oryza sativa</i> ssp. japonica) variety resistant to infection by the plant <i>Striga hermonthica</i>, an obligate root hemiparasite (Swarbrick et al., 2008, <i>New Phytol.</i> 179: 515-529). Nipponbare is susceptible to <i>Xanthomonas oryzae</i> pv. <i>oryzae</i> strains BAI3 (from Burkina Faso), PXO99A (from the Philippines; race 6), PXO86 (from the Philippines; race 2), T7174 (from Japan; race 1), and MAI1 (from Mali). Nipponbare is well transformable with <i>Agrobacterium tumefaciens</i>: using <i>A. tumefaciens</i> strain EHA 105, transient transformation frequency has been found to be 85.2%, stable transformation frequency 53.52% (Tie et al., 2012, <i>Plant Mol. Biol.</i> 78: 1-18). Nipponbare is susceptible to <i>Meloidogyne graminicola</i>, a root knot nematode that induces re-differentiation of root cells into multinucleate giant cells and formation of hook-like galls. Nipponbare is susceptible to <i>Magnaporthe oryzae</i> isolate FR13 (virulent isolate from France) and resistant to <i>M. oryzae</i> isolates CL3.6.7 (avirulent isolate) and BR32 (nonadapted isolate from Brazil) (Abbruscato et al., 2012, <i>Mol Plant Pathol.</i>; Faivre-Rampant et al., 2008, <i>New Phytol.</i> 180: 899-910). This variety is sensitive to drought stress; drought index 0.54 (Wei et al., 2017, <i>Front Plant Sci.</i> 8: 473). Nipponbare is susceptible to Rice Stripe Virus (RSV) (Zhao et al., 2016, <i>New Phytol.</i> 210: 196-207).</p> | roots |
|--|------|------|---------------------------------------------------------------------------|--------------------------------------------------------------------------------------------------------------------------------------------------------------------------------------------------------------------------------------------------------------------------------------------------------------------------------------------------------------------------------------------------------------------------------------------------------------------------------------------------------------------------------------------------------------------------|------------|----------------------------------------------------------------------------------------------------------------------------------------------------------------------------------------------------------------------------------------------------------------------------------------------------------------------------------------------------------------------------------------------------------------------------------------------------------------------------------------------------------------------------------------------------------------------------------------------------------------------------------------------------------------------------------------------------------------------------------------------------------------------------------------------------------------------------------------------------------------------------------------------------------------------------------------------------------------------------------------------------------------------------------------------------------------------------------------------------------------------------------------------------------------------------------------------------------------------------------------------------------------------------------------------------------------------------------------------------------------------------------------------------------------------------------------------------------------------------------------------------------------------|-------|

|          |      |      |                                                                                    |                                                                                                                                                                                                                                                                                                                                                                                                                                                                                                                              |         |                                                                                                                                                                                                                                                                                                                                                                                                                                                                                                                                                                                                                                                                                                                                                                                                                                                                                                                                                                                                                       |       |
|----------|------|------|------------------------------------------------------------------------------------|------------------------------------------------------------------------------------------------------------------------------------------------------------------------------------------------------------------------------------------------------------------------------------------------------------------------------------------------------------------------------------------------------------------------------------------------------------------------------------------------------------------------------|---------|-----------------------------------------------------------------------------------------------------------------------------------------------------------------------------------------------------------------------------------------------------------------------------------------------------------------------------------------------------------------------------------------------------------------------------------------------------------------------------------------------------------------------------------------------------------------------------------------------------------------------------------------------------------------------------------------------------------------------------------------------------------------------------------------------------------------------------------------------------------------------------------------------------------------------------------------------------------------------------------------------------------------------|-------|
| OS-00239 | 2.33 | 7.8  | phosphorus (Dular; 1 $\mu$ M Pi; root) vs phosphorus (Dular; 320 $\mu$ M Pi; root) | Root samples of 15-day-old Dular seedlings grown in a phosphate deficient nutrient solution (1 $\mu$ M Pi); the solution (pH 5.5) was exchanged every 24h. Other growth conditions: growth chamber, 16h light (250-300 $\mu$ mol photons m <sup>-2</sup> s <sup>-1</sup> ) at 30°C / 8h darkness at 28°C cycles, 70% relative humidity. The nutrient solution as described in (Yoshida et al., 1976, Laboratory Manual for Physiological Studies of Rice, Ed 3, International Rice Research Institute, Manila, Philippines). | Dular   | Traditional <i>Oryza sativa</i> ssp. indica variety with very low yield potential (7-22q/ha) and high tolerance to low phosphate (Pi) content in the soil. Dular is more efficient in Pi utilization and better preserves root growth under Pi-limiting conditions than a low Pi-sensitive variety, Pusa Basmati 1. When plants were grown under low Pi (1 $\mu$ M) for 15 days, Dular root length was 9.38 $\pm$ 0.17cm while Pusa Basmati 1 root length was 7.41 $\pm$ 0.15cm. Under low Pi, Dular produced more and longer lateral roots than Pusa Basmati 1. Even though under sufficient Pi root and shoot Pi content was lower in Dular than in Pusa Basmati 1, under low Pi root and shoot Pi content was higher in Dular than in Pusa Basmati 1 (Mehra et al., 2016, Front Plant Sci. 6: 1184). Dular belongs to wide-compatibility variety (WCV) rice germplasms, i.e. Dular is able to produce fertile hybrids when crossed to indica or japonica varieties (Wang et al., 1998, Theor Appl Genet. 97: 407). | roots |
| OS-00003 | 2.17 | 4.89 | arsenate (Azucena) vs untreated root samples (Azucena)                             | Root samples of rice variety Azucena grown for 7 days in hydroponics on phosphate-free nutrient solution containing 0.1mM Mg <sup>2+</sup> and SO <sub>4</sub> <sup>2-</sup> , 0.2mM Ca <sup>2+</sup> and K <sup>+</sup> , 0.6mM NO <sub>3</sub> <sup>-</sup> , and 1ppm (13.3 $\mu$ M) arsenate (Na <sub>2</sub> HAsO <sub>4</sub> ).                                                                                                                                                                                       | Azucena | Traditional japonica ( <i>Oryza sativa</i> ssp. japonica) upland cultivar; origin: the Philippines. Azucena is resistant to aluminum stress (Al <sup>3+</sup> ) (Arbelaez et al., 2017, Plant Direct 1).                                                                                                                                                                                                                                                                                                                                                                                                                                                                                                                                                                                                                                                                                                                                                                                                              | roots |



|          |      |      |                                                                                            |                                                                                                                                                                                                                                                                                                                                                                                                                                                                                                                            |                |                                                                                                                                                                                                                                                                                                                                                                                                                                                                                   |       |
|----------|------|------|--------------------------------------------------------------------------------------------|----------------------------------------------------------------------------------------------------------------------------------------------------------------------------------------------------------------------------------------------------------------------------------------------------------------------------------------------------------------------------------------------------------------------------------------------------------------------------------------------------------------------------|----------------|-----------------------------------------------------------------------------------------------------------------------------------------------------------------------------------------------------------------------------------------------------------------------------------------------------------------------------------------------------------------------------------------------------------------------------------------------------------------------------------|-------|
| OS-00239 | 1.01 | 2.15 | phosphorus (Pusa Basmati 1; 1μM Pi; shoot) vs phosphorus (Pusa Basmati 1; 320μM Pi; shoot) | Shoot samples of 15-day-old Pusa Basmati 1 seedlings grown in a phosphate deficient nutrient solution (1μM Pi); the solution (pH 5.5) was exchanged every 24h. Other growth conditions: growth chamber, 16h light (250-300μmol photons m <sup>-2</sup> s <sup>-1</sup> ) at 30°C / 8h darkness at 28°C cycles, 70% relative humidity. The nutrient solution as described in (Yoshida et al., 1976, Laboratory Manual for Physiological Studies of Rice, Ed 3, International Rice Research Institute, Manila, Philippines). | Pusa Basmati 1 | Semi-dwarf aromatic (Evolved Basmati) cultivar developed by The Indian Agricultural Research Institute (IARI), released in 1989. Low number of seeds (approx. 181) per panicle (Deshmukh et al., 2010, Funct Integr Genomics 10: 339-47). Pusa Basmati 1 is susceptible to Magnaporthe oryzae strain Mo-nwi-53 (Jain et al., 2017, Front Plant Sci. 8: 93). Pusa Basmati 1 is sensitive to low phosphate (Pi) content in the soil (Mehra et al., 2016, Front Plant Sci. 6: 1184). | shoot |
|----------|------|------|--------------------------------------------------------------------------------------------|----------------------------------------------------------------------------------------------------------------------------------------------------------------------------------------------------------------------------------------------------------------------------------------------------------------------------------------------------------------------------------------------------------------------------------------------------------------------------------------------------------------------------|----------------|-----------------------------------------------------------------------------------------------------------------------------------------------------------------------------------------------------------------------------------------------------------------------------------------------------------------------------------------------------------------------------------------------------------------------------------------------------------------------------------|-------|

|  |  |  |                                                                                                                           |                                                                                                                                                                                                                                                                                                                                                                                                                                                                                                                           |            |                                                                                                                                                                                                                                                                                                                                                                                                                                                                                                                                                                                                                                                                                                                                                                                                                                                                                                                                                                                                                                                                                                                                                                                                                                                                                                                                                                                                                                                                                                                    |       |
|--|--|--|---------------------------------------------------------------------------------------------------------------------------|---------------------------------------------------------------------------------------------------------------------------------------------------------------------------------------------------------------------------------------------------------------------------------------------------------------------------------------------------------------------------------------------------------------------------------------------------------------------------------------------------------------------------|------------|--------------------------------------------------------------------------------------------------------------------------------------------------------------------------------------------------------------------------------------------------------------------------------------------------------------------------------------------------------------------------------------------------------------------------------------------------------------------------------------------------------------------------------------------------------------------------------------------------------------------------------------------------------------------------------------------------------------------------------------------------------------------------------------------------------------------------------------------------------------------------------------------------------------------------------------------------------------------------------------------------------------------------------------------------------------------------------------------------------------------------------------------------------------------------------------------------------------------------------------------------------------------------------------------------------------------------------------------------------------------------------------------------------------------------------------------------------------------------------------------------------------------|-------|
|  |  |  | iron;<br>phosphorus<br>(no Fe and P<br>for 10d;<br>shoot) vs<br>untreated<br>shoot<br>samples<br>(sufficient<br>Fe and P) | Shoot samples of cultivar Nipponbare germinated for 2 days in distilled water and then floated for 10 days on the Yoshida nutrient solution (Yoshida et al., 1976, Laboratory Manual for Physiological Studies of Rice, Ed 3. International Rice Research Institute, Manila, The Philippines) lacking iron (FeCl <sub>3</sub> ) and phosphorus (NaH <sub>2</sub> PO <sub>4</sub> ). Other growth conditions: growth chamber, 12h light (450μmol photons m <sup>-2</sup> s <sup>-1</sup> ) at 30°C / 12h darkness at 22°C. | Nipponbare | Japonica ( <i>Oryza sativa</i> ssp. japonica) variety resistant to infection by the plant <i>Striga hermonthica</i> , an obligate root hemiparasite (Swarbrick et al., 2008, <i>New Phytol.</i> 179: 515-529). Nipponbare is susceptible to <i>Xanthomonas oryzae</i> pv. <i>oryzae</i> strains BAI3 (from Burkina Faso), PXO99A (from the Philippines; race 6), PXO86 (from the Philippines; race 2), T7174 (from Japan; race 1), and MAI1 (from Mali). Nipponbare is well transformable with <i>Agrobacterium tumefaciens</i> : using <i>A. tumefaciens</i> strain EHA 105, transient transformation frequency has been found to be 85.2%, stable transformation frequency 53.52% (Tie et al., 2012, <i>Plant Mol. Biol.</i> 78: 1-18). Nipponbare is susceptible to <i>Meloidogyne graminicola</i> , a root knot nematode that induces re-differentiation of root cells into multinucleate giant cells and formation of hook-like galls. Nipponbare is susceptible to <i>Magnaporthe oryzae</i> isolate FR13 (virulent isolate from France) and resistant to <i>M. oryzae</i> isolates CL3.6.7 (avirulent isolate) and BR32 (nonadapted isolate from Brazil) (Abbruscato et al., 2012, <i>Mol Plant Pathol.</i> ; Faivre-Rampant et al., 2008, <i>New Phytol.</i> 180: 899-910). This variety is sensitive to drought stress; drought index 0.54 (Wei et al., 2017, <i>Front Plant Sci.</i> 8: 473). Nipponbare is susceptible to Rice Stripe Virus (RSV) (Zhao et al., 2016, <i>New Phytol.</i> 210: 196-207). | roots |
|--|--|--|---------------------------------------------------------------------------------------------------------------------------|---------------------------------------------------------------------------------------------------------------------------------------------------------------------------------------------------------------------------------------------------------------------------------------------------------------------------------------------------------------------------------------------------------------------------------------------------------------------------------------------------------------------------|------------|--------------------------------------------------------------------------------------------------------------------------------------------------------------------------------------------------------------------------------------------------------------------------------------------------------------------------------------------------------------------------------------------------------------------------------------------------------------------------------------------------------------------------------------------------------------------------------------------------------------------------------------------------------------------------------------------------------------------------------------------------------------------------------------------------------------------------------------------------------------------------------------------------------------------------------------------------------------------------------------------------------------------------------------------------------------------------------------------------------------------------------------------------------------------------------------------------------------------------------------------------------------------------------------------------------------------------------------------------------------------------------------------------------------------------------------------------------------------------------------------------------------------|-------|

|          |       |       |                                                                              |                                                                                                                                                                                                                                                                                                                                                                                                                                                                                                                                                                              |            |                                                                                                                                                                                                                                                                                                                                                                                                                                                                                                                                                                                                                                                                                                                                                                                                                                                                                                                                                                                                                                                                                                                                                                                                                                                                                                                                                                                                                                                                                                                    |       |
|----------|-------|-------|------------------------------------------------------------------------------|------------------------------------------------------------------------------------------------------------------------------------------------------------------------------------------------------------------------------------------------------------------------------------------------------------------------------------------------------------------------------------------------------------------------------------------------------------------------------------------------------------------------------------------------------------------------------|------------|--------------------------------------------------------------------------------------------------------------------------------------------------------------------------------------------------------------------------------------------------------------------------------------------------------------------------------------------------------------------------------------------------------------------------------------------------------------------------------------------------------------------------------------------------------------------------------------------------------------------------------------------------------------------------------------------------------------------------------------------------------------------------------------------------------------------------------------------------------------------------------------------------------------------------------------------------------------------------------------------------------------------------------------------------------------------------------------------------------------------------------------------------------------------------------------------------------------------------------------------------------------------------------------------------------------------------------------------------------------------------------------------------------------------------------------------------------------------------------------------------------------------|-------|
| OS-00036 | -1.48 | -2.78 | iron (no Fe for 10d; shoot) vs iron; phosphorus (no Fe and P for 10d; shoot) | Shoot samples of cultivar Nipponbare germinated for 2 days in distilled water and then floated for 10 days on the Yoshida nutrient solution (Yoshida et al., 1976, Laboratory Manual for Physiological Studies of Rice, Ed 3. International Rice Research Institute, Manila, The Philippines) with optimal phosphorus (0.323mM NaH <sub>2</sub> PO <sub>4</sub> ) concentration but lacking iron (FeCl <sub>3</sub> ) and citric acid. Other growth conditions: growth chamber, 12h light (450μmol photons m <sup>-2</sup> s <sup>-1</sup> ) at 30°C / 12h darkness at 22°C. | Nipponbare | Japonica ( <i>Oryza sativa</i> ssp. japonica) variety resistant to infection by the plant <i>Striga hermonthica</i> , an obligate root hemiparasite (Swarbrick et al., 2008, <i>New Phytol.</i> 179: 515-529). Nipponbare is susceptible to <i>Xanthomonas oryzae</i> pv. <i>oryzae</i> strains BAI3 (from Burkina Faso), PXO99A (from the Philippines; race 6), PXO86 (from the Philippines; race 2), T7174 (from Japan; race 1), and MAI1 (from Mali). Nipponbare is well transformable with <i>Agrobacterium tumefaciens</i> : using <i>A. tumefaciens</i> strain EHA 105, transient transformation frequency has been found to be 85.2%, stable transformation frequency 53.52% (Tie et al., 2012, <i>Plant Mol. Biol.</i> 78: 1-18). Nipponbare is susceptible to <i>Meloidogyne graminicola</i> , a root knot nematode that induces re-differentiation of root cells into multinucleate giant cells and formation of hook-like galls. Nipponbare is susceptible to <i>Magnaporthe oryzae</i> isolate FR13 (virulent isolate from France) and resistant to <i>M. oryzae</i> isolates CL3.6.7 (avirulent isolate) and BR32 (nonadapted isolate from Brazil) (Abbruscato et al., 2012, <i>Mol Plant Pathol.</i> ; Faivre-Rampant et al., 2008, <i>New Phytol.</i> 180: 899-910). This variety is sensitive to drought stress; drought index 0.54 (Wei et al., 2017, <i>Front Plant Sci.</i> 8: 473). Nipponbare is susceptible to Rice Stripe Virus (RSV) (Zhao et al., 2016, <i>New Phytol.</i> 210: 196-207). | shoot |
|----------|-------|-------|------------------------------------------------------------------------------|------------------------------------------------------------------------------------------------------------------------------------------------------------------------------------------------------------------------------------------------------------------------------------------------------------------------------------------------------------------------------------------------------------------------------------------------------------------------------------------------------------------------------------------------------------------------------|------------|--------------------------------------------------------------------------------------------------------------------------------------------------------------------------------------------------------------------------------------------------------------------------------------------------------------------------------------------------------------------------------------------------------------------------------------------------------------------------------------------------------------------------------------------------------------------------------------------------------------------------------------------------------------------------------------------------------------------------------------------------------------------------------------------------------------------------------------------------------------------------------------------------------------------------------------------------------------------------------------------------------------------------------------------------------------------------------------------------------------------------------------------------------------------------------------------------------------------------------------------------------------------------------------------------------------------------------------------------------------------------------------------------------------------------------------------------------------------------------------------------------------------|-------|

LOC\_Os05g31620.1

|       |       |                                                                              |                                                                                                                                                                                                                                                                                                                                                                                                                                                                                                                                                                              |            |                                                                                                                                                                                                                                                                                                                                                                                                                                                                                                                                                                                                                                                                                                                                                                                                                                                                                                                                                                                                                                                                                                                                                                                                                                                                                                                                                                                                                                                                                                                    |       |
|-------|-------|------------------------------------------------------------------------------|------------------------------------------------------------------------------------------------------------------------------------------------------------------------------------------------------------------------------------------------------------------------------------------------------------------------------------------------------------------------------------------------------------------------------------------------------------------------------------------------------------------------------------------------------------------------------|------------|--------------------------------------------------------------------------------------------------------------------------------------------------------------------------------------------------------------------------------------------------------------------------------------------------------------------------------------------------------------------------------------------------------------------------------------------------------------------------------------------------------------------------------------------------------------------------------------------------------------------------------------------------------------------------------------------------------------------------------------------------------------------------------------------------------------------------------------------------------------------------------------------------------------------------------------------------------------------------------------------------------------------------------------------------------------------------------------------------------------------------------------------------------------------------------------------------------------------------------------------------------------------------------------------------------------------------------------------------------------------------------------------------------------------------------------------------------------------------------------------------------------------|-------|
|       |       |                                                                              |                                                                                                                                                                                                                                                                                                                                                                                                                                                                                                                                                                              |            |                                                                                                                                                                                                                                                                                                                                                                                                                                                                                                                                                                                                                                                                                                                                                                                                                                                                                                                                                                                                                                                                                                                                                                                                                                                                                                                                                                                                                                                                                                                    |       |
| -2.51 | -5.67 | iron (no Fe for 10d; shoot) vs untreated shoot samples (sufficient Fe and P) | Shoot samples of cultivar Nipponbare germinated for 2 days in distilled water and then floated for 10 days on the Yoshida nutrient solution (Yoshida et al., 1976, Laboratory Manual for Physiological Studies of Rice, Ed 3. International Rice Research Institute, Manila, The Philippines) with optimal phosphorus (0.323mM NaH <sub>2</sub> PO <sub>4</sub> ) concentration but lacking iron (FeCl <sub>3</sub> ) and citric acid. Other growth conditions: growth chamber, 12h light (450μmol photons m <sup>-2</sup> s <sup>-1</sup> ) at 30°C / 12h darkness at 22°C. | Nipponbare | Japonica ( <i>Oryza sativa</i> ssp. japonica) variety resistant to infection by the plant <i>Striga hermonthica</i> , an obligate root hemiparasite (Swarbrick et al., 2008, <i>New Phytol.</i> 179: 515-529). Nipponbare is susceptible to <i>Xanthomonas oryzae</i> pv. <i>oryzae</i> strains BAI3 (from Burkina Faso), PXO99A (from the Philippines; race 6), PXO86 (from the Philippines; race 2), T7174 (from Japan; race 1), and MAI1 (from Mali). Nipponbare is well transformable with <i>Agrobacterium tumefaciens</i> : using <i>A. tumefaciens</i> strain EHA 105, transient transformation frequency has been found to be 85.2%, stable transformation frequency 53.52% (Tie et al., 2012, <i>Plant Mol. Biol.</i> 78: 1-18). Nipponbare is susceptible to <i>Meloidogyne graminicola</i> , a root knot nematode that induces re-differentiation of root cells into multinucleate giant cells and formation of hook-like galls. Nipponbare is susceptible to <i>Magnaporthe oryzae</i> isolate FR13 (virulent isolate from France) and resistant to <i>M. oryzae</i> isolates CL3.6.7 (avirulent isolate) and BR32 (nonadapted isolate from Brazil) (Abbruscato et al., 2012, <i>Mol Plant Pathol.</i> ; Faivre-Rampant et al., 2008, <i>New Phytol.</i> 180: 899-910). This variety is sensitive to drought stress; drought index 0.54 (Wei et al., 2017, <i>Front Plant Sci.</i> 8: 473). Nipponbare is susceptible to Rice Stripe Virus (RSV) (Zhao et al., 2016, <i>New Phytol.</i> 210: 196-207). | shoot |

|  |  |  |                                                                           |                                                                                                                                                                                                                                                                                                                                                                                                                                                                                                                                                                                                                                                                                                                                           |             |                                                         |          |
|--|--|--|---------------------------------------------------------------------------|-------------------------------------------------------------------------------------------------------------------------------------------------------------------------------------------------------------------------------------------------------------------------------------------------------------------------------------------------------------------------------------------------------------------------------------------------------------------------------------------------------------------------------------------------------------------------------------------------------------------------------------------------------------------------------------------------------------------------------------------|-------------|---------------------------------------------------------|----------|
|  |  |  | phosphorus (low Pi for 24h) vs untreated seedling samples (sufficient Pi) | Seedling samples of cultivar Zhonghua 10 grown for 7 days in a nutrient solution with sufficient phosphate (0.323mM NaH <sub>2</sub> PO <sub>4</sub> ), then transferred to low phosphate (0.016 mM NaH <sub>2</sub> PO <sub>4</sub> ) for 24h. Other components of the nutrient solution (pH 5.5): 1.425mM NH <sub>4</sub> NO <sub>3</sub> , 0.513mM K <sub>2</sub> SO <sub>4</sub> , 0.998mM CaCl <sub>2</sub> , 1.643mM MgSO <sub>4</sub> , 0.168mM Na <sub>2</sub> SiO <sub>3</sub> , 0.125mM Fe-EDTA, 0.019mM H <sub>3</sub> BO <sub>3</sub> , 0.009mM MnCl <sub>2</sub> , 0.155mM CuSO <sub>4</sub> , 0.152mM ZnSO <sub>4</sub> , 0.075mM Na <sub>2</sub> MoO <sub>4</sub> . Other conditions: 16h light at 30°C / 8h dark at 22°C. | Zhonghua 10 | Japonica ( <i>Oryza sativa</i> ssp. japonica) cultivar. | seedling |
|--|--|--|---------------------------------------------------------------------------|-------------------------------------------------------------------------------------------------------------------------------------------------------------------------------------------------------------------------------------------------------------------------------------------------------------------------------------------------------------------------------------------------------------------------------------------------------------------------------------------------------------------------------------------------------------------------------------------------------------------------------------------------------------------------------------------------------------------------------------------|-------------|---------------------------------------------------------|----------|

|          |      |       |                                                                          |                                                                                                                                                                                                                                                                                                                                                                                                                                                                                                                                                                                                                                                                                                                                         |             |                                                         |          |
|----------|------|-------|--------------------------------------------------------------------------|-----------------------------------------------------------------------------------------------------------------------------------------------------------------------------------------------------------------------------------------------------------------------------------------------------------------------------------------------------------------------------------------------------------------------------------------------------------------------------------------------------------------------------------------------------------------------------------------------------------------------------------------------------------------------------------------------------------------------------------------|-------------|---------------------------------------------------------|----------|
| OS-00091 | -1.6 | -3.03 | phosphorus (low Pi for 6h) vs untreated seedling samples (sufficient Pi) | Seedling samples of cultivar Zhonghua 10 grown for 7 days in a nutrient solution with sufficient phosphate (0.323mM NaH <sub>2</sub> PO <sub>4</sub> ), then transferred to low phosphate (0.016mM NaH <sub>2</sub> PO <sub>4</sub> ) for 6h. Other components of the nutrient solution (pH 5.5): 1.425mM NH <sub>4</sub> NO <sub>3</sub> , 0.513mM K <sub>2</sub> SO <sub>4</sub> , 0.998mM CaCl <sub>2</sub> , 1.643mM MgSO <sub>4</sub> , 0.168mM Na <sub>2</sub> SiO <sub>3</sub> , 0.125mM Fe-EDTA, 0.019mM H <sub>3</sub> BO <sub>3</sub> , 0.009mM MnCl <sub>2</sub> , 0.155mM CuSO <sub>4</sub> , 0.152mM ZnSO <sub>4</sub> , 0.075mM Na <sub>2</sub> MoO <sub>4</sub> . Other conditions: 16h light at 30°C / 8h dark at 22°C. | Zhonghua 10 | Japonica ( <i>Oryza sativa</i> ssp. japonica) cultivar. | seedling |
|----------|------|-------|--------------------------------------------------------------------------|-----------------------------------------------------------------------------------------------------------------------------------------------------------------------------------------------------------------------------------------------------------------------------------------------------------------------------------------------------------------------------------------------------------------------------------------------------------------------------------------------------------------------------------------------------------------------------------------------------------------------------------------------------------------------------------------------------------------------------------------|-------------|---------------------------------------------------------|----------|

|       |        |                                                                                     |                                                                                                                                                                                                                                                                                                                                                                                                                                                                                                                                                                                                                                                                                                                                           |             |                                                                                                                                                                                                                                                                                                                                                                                                                                                                                                                                                                                                                                                                                                                                                                                                                                                                                                                                                                                                         |          |
|-------|--------|-------------------------------------------------------------------------------------|-------------------------------------------------------------------------------------------------------------------------------------------------------------------------------------------------------------------------------------------------------------------------------------------------------------------------------------------------------------------------------------------------------------------------------------------------------------------------------------------------------------------------------------------------------------------------------------------------------------------------------------------------------------------------------------------------------------------------------------------|-------------|---------------------------------------------------------------------------------------------------------------------------------------------------------------------------------------------------------------------------------------------------------------------------------------------------------------------------------------------------------------------------------------------------------------------------------------------------------------------------------------------------------------------------------------------------------------------------------------------------------------------------------------------------------------------------------------------------------------------------------------------------------------------------------------------------------------------------------------------------------------------------------------------------------------------------------------------------------------------------------------------------------|----------|
| -2.92 | -7.58  | phosphorus (low Pi for 48h) vs untreated seedling samples (sufficient Pi)           | Seedling samples of cultivar Zhonghua 10 grown for 7 days in a nutrient solution with sufficient phosphate (0.323mM NaH <sub>2</sub> PO <sub>4</sub> ), then transferred to low phosphate (0.016 mM NaH <sub>2</sub> PO <sub>4</sub> ) for 48h. Other components of the nutrient solution (pH 5.5): 1.425mM NH <sub>4</sub> NO <sub>3</sub> , 0.513mM K <sub>2</sub> SO <sub>4</sub> , 0.998mM CaCl <sub>2</sub> , 1.643mM MgSO <sub>4</sub> , 0.168mM Na <sub>2</sub> SiO <sub>3</sub> , 0.125mM Fe-EDTA, 0.019mM H <sub>3</sub> BO <sub>3</sub> , 0.009mM MnCl <sub>2</sub> , 0.155mM CuSO <sub>4</sub> , 0.152mM ZnSO <sub>4</sub> , 0.075mM Na <sub>2</sub> MoO <sub>4</sub> . Other conditions: 16h light at 30°C / 8h dark at 22°C. | Zhonghua 10 | Japonica ( <i>Oryza sativa</i> ssp. japonica) cultivar.                                                                                                                                                                                                                                                                                                                                                                                                                                                                                                                                                                                                                                                                                                                                                                                                                                                                                                                                                 | seedling |
| -3.47 | -11.34 | phosphorus (Dular; 320μM Pi; shoot) vs phosphorus (Pusa Basmati 1; 320μM Pi; shoot) | Shoot samples of 15-day-old Dular seedlings grown in a phosphate sufficient nutrient solution (320μM Pi); the solution (pH 5.5) was exchanged every 24h. Other growth conditions: growth chamber, 16h light (250-300μmol photons m <sup>-2</sup> s <sup>-1</sup> ) at 30°C / 8h darkness at 28°C cycles, 70% relative humidity. The nutrient solution as described in (Yoshida et al., 1976, Laboratory Manual for Physiological Studies of Rice, Ed 3, International Rice Research Institute, Manila, Philippines).                                                                                                                                                                                                                      | Dular       | Traditional <i>Oryza sativa</i> ssp. indica variety with very low yield potential (7-22q/ha) and high tolerance to low phosphate (Pi) content in the soil. Dular is more efficient in Pi utilization and better preserves root growth under Pi-limiting conditions than a low Pi-sensitive variety, Pusa Basmati 1. When plants were grown under low Pi (1μM) for 15 days, Dular root length was 9.38 ± 0.17cm while Pusa Basmati 1 root length was 7.41 ± 0.15cm. Under low Pi, Dular produced more and longer lateral roots than Pusa Basmati 1. Even though under sufficient Pi root and shoot Pi content was lower in Dular than in Pusa Basmati 1, under low Pi root and shoot Pi content was higher in Dular than in Pusa Basmati 1 (Mehra et al., 2016, Front Plant Sci. 6: 1184). Dular belongs to wide-compatibility variety (WCV) rice germplasms, i.e. Dular is able to produce fertile hybrids when crossed to indica or japonica varieties (Wang et al., 1998, Theor Appl Genet. 97: 407). | shoot    |

|          |       |        |                                                                                 |                                                                                                                                                                                                                                                                                                                                                                                                                                                                                                                   |       |                                                                                                                                                                                                                                                                                                                                                                                                                                                                                                                                                                                                                                                                                                                                                                                                                                                                                                                                                                                                        |       |
|----------|-------|--------|---------------------------------------------------------------------------------|-------------------------------------------------------------------------------------------------------------------------------------------------------------------------------------------------------------------------------------------------------------------------------------------------------------------------------------------------------------------------------------------------------------------------------------------------------------------------------------------------------------------|-------|--------------------------------------------------------------------------------------------------------------------------------------------------------------------------------------------------------------------------------------------------------------------------------------------------------------------------------------------------------------------------------------------------------------------------------------------------------------------------------------------------------------------------------------------------------------------------------------------------------------------------------------------------------------------------------------------------------------------------------------------------------------------------------------------------------------------------------------------------------------------------------------------------------------------------------------------------------------------------------------------------------|-------|
| OS-00239 | -3.85 | -9.32  | phosphorus (Dular; 1μM Pi; root) vs phosphorus (Pusa Basmati 1; 1μM Pi; root)   | Root samples of 15-day-old Dular seedlings grown in a phosphate deficient nutrient solution (1μM Pi); the solution (pH 5.5) was exchanged every 24h. Other growth conditions: growth chamber, 16h light (250-300μmol photons m <sup>-2</sup> s <sup>-1</sup> ) at 30°C / 8h darkness at 28°C cycles, 70% relative humidity. The nutrient solution as described in (Yoshida et al., 1976, Laboratory Manual for Physiological Studies of Rice, Ed 3, International Rice Research Institute, Manila, Philippines).  | Dular | Traditional <i>Oryza sativa</i> ssp. indica variety with very low yield potential (7-22q/ha) and high tolerance to low phosphate (Pi) content in the soil. Dular is more efficient in Pi utilization and better preserves root growth under Pi-limiting conditions than a low Pi-sensitive variety, Pusa Basmati 1. When plants were grown under low Pi (1μM) for 15 days, Dular root length was 9.38 ± 0.17cm while Pusa Basmati 1 root length was 7.41 ± 0.15cm. Under low Pi, Dular produced more and longer lateral roots than Pusa Basmati 1. Even though under sufficient Pi root and shoot Pi content was lower in Dular than in Pusa Basmati 1, under low Pi root and shoot Pi content was higher in Dular than in Pusa Basmati 1 (Mehra et al., 2016, Front Plant Sci. 6: 1184). Dular belongs to wide-compatibility variety (WCV) rice germplasm, i.e. Dular is able to produce fertile hybrids when crossed to indica or japonica varieties (Wang et al., 1998, Theor Appl Genet. 97: 407). | roots |
|          | -3.98 | -15.73 | phosphorus (Dular; 1μM Pi; shoot) vs phosphorus (Pusa Basmati 1; 1μM Pi; shoot) | Shoot samples of 15-day-old Dular seedlings grown in a phosphate deficient nutrient solution (1μM Pi); the solution (pH 5.5) was exchanged every 24h. Other growth conditions: growth chamber, 16h light (250-300μmol photons m <sup>-2</sup> s <sup>-1</sup> ) at 30°C / 8h darkness at 28°C cycles, 70% relative humidity. The nutrient solution as described in (Yoshida et al., 1976, Laboratory Manual for Physiological Studies of Rice, Ed 3, International Rice Research Institute, Manila, Philippines). | Dular | Traditional <i>Oryza sativa</i> ssp. indica variety with very low yield potential (7-22q/ha) and high tolerance to low phosphate (Pi) content in the soil. Dular is more efficient in Pi utilization and better preserves root growth under Pi-limiting conditions than a low Pi-sensitive variety, Pusa Basmati 1. When plants were grown under low Pi (1μM) for 15 days, Dular root length was 9.38 ± 0.17cm while Pusa Basmati 1 root length was 7.41 ± 0.15cm. Under low Pi, Dular produced more and longer lateral roots than Pusa Basmati 1. Even though under sufficient Pi root and shoot Pi content was lower in Dular than in Pusa Basmati 1, under low Pi root and shoot Pi content was higher in Dular than in Pusa Basmati 1 (Mehra et al., 2016, Front Plant Sci. 6: 1184). Dular belongs to wide-compatibility variety (WCV) rice germplasm, i.e. Dular is able to produce fertile hybrids when crossed to indica or japonica varieties (Wang et al., 1998, Theor Appl Genet. 97: 407). | shoot |



|           |       |        |                                                                                   |                                                                                                                                                                                                                                                                                                                                                                                                                                                                                                                     |       |                                                                                                                                                                                                                                                                                                                                                                                                                                                                                                                                                                                                                                                                                                                                                                                                                                                                                                                                                                                                         |       |
|-----------|-------|--------|-----------------------------------------------------------------------------------|---------------------------------------------------------------------------------------------------------------------------------------------------------------------------------------------------------------------------------------------------------------------------------------------------------------------------------------------------------------------------------------------------------------------------------------------------------------------------------------------------------------------|-------|---------------------------------------------------------------------------------------------------------------------------------------------------------------------------------------------------------------------------------------------------------------------------------------------------------------------------------------------------------------------------------------------------------------------------------------------------------------------------------------------------------------------------------------------------------------------------------------------------------------------------------------------------------------------------------------------------------------------------------------------------------------------------------------------------------------------------------------------------------------------------------------------------------------------------------------------------------------------------------------------------------|-------|
| qRRSR5.11 | -5.84 | -57.23 | phosphorus (Dular; 320μM Pi; root) vs phosphorus (Pusa Basmati 1; 320μM Pi; root) | Root samples of 15-day-old Dular seedlings grown in a phosphate sufficient nutrient solution (320μM Pi); the solution (pH 5.5) was exchanged every 24h. Other growth conditions: growth chamber, 16h light (250-300μmol photons m <sup>-2</sup> s <sup>-1</sup> ) at 30°C / 8h darkness at 28°C cycles, 70% relative humidity. The nutrient solution as described in (Yoshida et al., 1976, Laboratory Manual for Physiological Studies of Rice, Ed 3, International Rice Research Institute, Manila, Philippines). | Dular | Traditional <i>Oryza sativa</i> ssp. indica variety with very low yield potential (7-22q/ha) and high tolerance to low phosphate (Pi) content in the soil. Dular is more efficient in Pi utilization and better preserves root growth under Pi-limiting conditions than a low Pi-sensitive variety, Pusa Basmati 1. When plants were grown under low Pi (1μM) for 15 days, Dular root length was 9.38 ± 0.17cm while Pusa Basmati 1 root length was 7.41 ± 0.15cm. Under low Pi, Dular produced more and longer lateral roots than Pusa Basmati 1. Even though under sufficient Pi root and shoot Pi content was lower in Dular than in Pusa Basmati 1, under low Pi root and shoot Pi content was higher in Dular than in Pusa Basmati 1 (Mehra et al., 2016, Front Plant Sci. 6: 1184). Dular belongs to wide-compatibility variety (WCV) rice germplasms, i.e. Dular is able to produce fertile hybrids when crossed to indica or japonica varieties (Wang et al., 1998, Theor Appl Genet. 97: 407). | roots |
|-----------|-------|--------|-----------------------------------------------------------------------------------|---------------------------------------------------------------------------------------------------------------------------------------------------------------------------------------------------------------------------------------------------------------------------------------------------------------------------------------------------------------------------------------------------------------------------------------------------------------------------------------------------------------------|-------|---------------------------------------------------------------------------------------------------------------------------------------------------------------------------------------------------------------------------------------------------------------------------------------------------------------------------------------------------------------------------------------------------------------------------------------------------------------------------------------------------------------------------------------------------------------------------------------------------------------------------------------------------------------------------------------------------------------------------------------------------------------------------------------------------------------------------------------------------------------------------------------------------------------------------------------------------------------------------------------------------------|-------|

|  |  |      |       |                                                                            |                                                                                                                                                                                                                                                                                                                                                                                                                                                                                                                                                                             |            |                                                                                                                                                                                                                                                                                                                                                                                                                                                                                                                                                                                                                                                                                                                                                                                                                                                                                                                                                                                                                                                                                                                                                                                                                                                                                                                                                                                                                                                                                                                    |       |
|--|--|------|-------|----------------------------------------------------------------------------|-----------------------------------------------------------------------------------------------------------------------------------------------------------------------------------------------------------------------------------------------------------------------------------------------------------------------------------------------------------------------------------------------------------------------------------------------------------------------------------------------------------------------------------------------------------------------------|------------|--------------------------------------------------------------------------------------------------------------------------------------------------------------------------------------------------------------------------------------------------------------------------------------------------------------------------------------------------------------------------------------------------------------------------------------------------------------------------------------------------------------------------------------------------------------------------------------------------------------------------------------------------------------------------------------------------------------------------------------------------------------------------------------------------------------------------------------------------------------------------------------------------------------------------------------------------------------------------------------------------------------------------------------------------------------------------------------------------------------------------------------------------------------------------------------------------------------------------------------------------------------------------------------------------------------------------------------------------------------------------------------------------------------------------------------------------------------------------------------------------------------------|-------|
|  |  | 7.74 | 214.4 | iron (no Fe for 10d; root) vs iron; phosphorus (no Fe and P for 10d; root) | Root samples of cultivar Nipponbare germinated for 2 days in distilled water and then floated for 10 days on the Yoshida nutrient solution (Yoshida et al., 1976, Laboratory Manual for Physiological Studies of Rice, Ed 3. International Rice Research Institute, Manila, The Philippines) with optimal phosphorus (0.323mM NaH <sub>2</sub> PO <sub>4</sub> ) concentration but lacking iron (FeCl <sub>3</sub> ) and citric acid. Other growth conditions: growth chamber, 12h light (450μmol photons m <sup>-2</sup> s <sup>-1</sup> ) at 30°C / 12h darkness at 22°C. | Nipponbare | Japonica ( <i>Oryza sativa</i> ssp. japonica) variety resistant to infection by the plant <i>Striga hermonthica</i> , an obligate root hemiparasite (Swarbrick et al., 2008, <i>New Phytol.</i> 179: 515-529). Nipponbare is susceptible to <i>Xanthomonas oryzae</i> pv. <i>oryzae</i> strains BAI3 (from Burkina Faso), PXO99A (from the Philippines; race 6), PXO86 (from the Philippines; race 2), T7174 (from Japan; race 1), and MAI1 (from Mali). Nipponbare is well transformable with <i>Agrobacterium tumefaciens</i> : using <i>A. tumefaciens</i> strain EHA 105, transient transformation frequency has been found to be 85.2%, stable transformation frequency 53.52% (Tie et al., 2012, <i>Plant Mol. Biol.</i> 78: 1-18). Nipponbare is susceptible to <i>Meloidogyne graminicola</i> , a root knot nematode that induces re-differentiation of root cells into multinucleate giant cells and formation of hook-like galls. Nipponbare is susceptible to <i>Magnaporthe oryzae</i> isolate FR13 (virulent isolate from France) and resistant to <i>M. oryzae</i> isolates CL3.6.7 (avirulent isolate) and BR32 (nonadapted isolate from Brazil) (Abbruscato et al., 2012, <i>Mol Plant Pathol.</i> ; Faivre-Rampant et al., 2008, <i>New Phytol.</i> 180: 899-910). This variety is sensitive to drought stress; drought index 0.54 (Wei et al., 2017, <i>Front Plant Sci.</i> 8: 473). Nipponbare is susceptible to Rice Stripe Virus (RSV) (Zhao et al., 2016, <i>New Phytol.</i> 210: 196-207). | roots |
|--|--|------|-------|----------------------------------------------------------------------------|-----------------------------------------------------------------------------------------------------------------------------------------------------------------------------------------------------------------------------------------------------------------------------------------------------------------------------------------------------------------------------------------------------------------------------------------------------------------------------------------------------------------------------------------------------------------------------|------------|--------------------------------------------------------------------------------------------------------------------------------------------------------------------------------------------------------------------------------------------------------------------------------------------------------------------------------------------------------------------------------------------------------------------------------------------------------------------------------------------------------------------------------------------------------------------------------------------------------------------------------------------------------------------------------------------------------------------------------------------------------------------------------------------------------------------------------------------------------------------------------------------------------------------------------------------------------------------------------------------------------------------------------------------------------------------------------------------------------------------------------------------------------------------------------------------------------------------------------------------------------------------------------------------------------------------------------------------------------------------------------------------------------------------------------------------------------------------------------------------------------------------|-------|

|          |      |       |                                                                            |                                                                                                                                                                                                                                                                                                                                                                                                                                                                                                                                                                             |            |                                                                                                                                                                                                                                                                                                                                                                                                                                                                                                                                                                                                                                                                                                                                                                                                                                                                                                                                                                                                                                                                                                                                                                                                                                                                                                                                                                                                                                                                                                                    |       |
|----------|------|-------|----------------------------------------------------------------------------|-----------------------------------------------------------------------------------------------------------------------------------------------------------------------------------------------------------------------------------------------------------------------------------------------------------------------------------------------------------------------------------------------------------------------------------------------------------------------------------------------------------------------------------------------------------------------------|------------|--------------------------------------------------------------------------------------------------------------------------------------------------------------------------------------------------------------------------------------------------------------------------------------------------------------------------------------------------------------------------------------------------------------------------------------------------------------------------------------------------------------------------------------------------------------------------------------------------------------------------------------------------------------------------------------------------------------------------------------------------------------------------------------------------------------------------------------------------------------------------------------------------------------------------------------------------------------------------------------------------------------------------------------------------------------------------------------------------------------------------------------------------------------------------------------------------------------------------------------------------------------------------------------------------------------------------------------------------------------------------------------------------------------------------------------------------------------------------------------------------------------------|-------|
| OS-00036 | 7.47 | 175.8 | iron (no Fe for 10d; root) vs untreated root samples (sufficient Fe and P) | Root samples of cultivar Nipponbare germinated for 2 days in distilled water and then floated for 10 days on the Yoshida nutrient solution (Yoshida et al., 1976, Laboratory Manual for Physiological Studies of Rice, Ed 3. International Rice Research Institute, Manila, The Philippines) with optimal phosphorus (0.323mM NaH <sub>2</sub> PO <sub>4</sub> ) concentration but lacking iron (FeCl <sub>3</sub> ) and citric acid. Other growth conditions: growth chamber, 12h light (450μmol photons m <sup>-2</sup> s <sup>-1</sup> ) at 30°C / 12h darkness at 22°C. | Nipponbare | Japonica ( <i>Oryza sativa</i> ssp. japonica) variety resistant to infection by the plant <i>Striga hermonthica</i> , an obligate root hemiparasite (Swarbrick et al., 2008, <i>New Phytol.</i> 179: 515-529). Nipponbare is susceptible to <i>Xanthomonas oryzae</i> pv. <i>oryzae</i> strains BAI3 (from Burkina Faso), PXO99A (from the Philippines; race 6), PXO86 (from the Philippines; race 2), T7174 (from Japan; race 1), and MAI1 (from Mali). Nipponbare is well transformable with <i>Agrobacterium tumefaciens</i> : using <i>A. tumefaciens</i> strain EHA 105, transient transformation frequency has been found to be 85.2%, stable transformation frequency 53.52% (Tie et al., 2012, <i>Plant Mol. Biol.</i> 78: 1-18). Nipponbare is susceptible to <i>Meloidogyne graminicola</i> , a root knot nematode that induces re-differentiation of root cells into multinucleate giant cells and formation of hook-like galls. Nipponbare is susceptible to <i>Magnaporthe oryzae</i> isolate FR13 (virulent isolate from France) and resistant to <i>M. oryzae</i> isolates CL3.6.7 (avirulent isolate) and BR32 (nonadapted isolate from Brazil) (Abbruscato et al., 2012, <i>Mol Plant Pathol.</i> ; Faivre-Rampant et al., 2008, <i>New Phytol.</i> 180: 899-910). This variety is sensitive to drought stress; drought index 0.54 (Wei et al., 2017, <i>Front Plant Sci.</i> 8: 473). Nipponbare is susceptible to Rice Stripe Virus (RSV) (Zhao et al., 2016, <i>New Phytol.</i> 210: 196-207). | roots |
|----------|------|-------|----------------------------------------------------------------------------|-----------------------------------------------------------------------------------------------------------------------------------------------------------------------------------------------------------------------------------------------------------------------------------------------------------------------------------------------------------------------------------------------------------------------------------------------------------------------------------------------------------------------------------------------------------------------------|------------|--------------------------------------------------------------------------------------------------------------------------------------------------------------------------------------------------------------------------------------------------------------------------------------------------------------------------------------------------------------------------------------------------------------------------------------------------------------------------------------------------------------------------------------------------------------------------------------------------------------------------------------------------------------------------------------------------------------------------------------------------------------------------------------------------------------------------------------------------------------------------------------------------------------------------------------------------------------------------------------------------------------------------------------------------------------------------------------------------------------------------------------------------------------------------------------------------------------------------------------------------------------------------------------------------------------------------------------------------------------------------------------------------------------------------------------------------------------------------------------------------------------------|-------|

|      |       |                                                                              |                                                                                                                                                                                                                                                                                                                                                                                                                                                                                                                                                                              |            |                                                                                                                                                                                                                                                                                                                                                                                                                                                                                                                                                                                                                                                                                                                                                                                                                                                                                                                                                                                                                                                                                                                                                                                                                                                                                                                                                                                                                                                                                                                    |       |
|------|-------|------------------------------------------------------------------------------|------------------------------------------------------------------------------------------------------------------------------------------------------------------------------------------------------------------------------------------------------------------------------------------------------------------------------------------------------------------------------------------------------------------------------------------------------------------------------------------------------------------------------------------------------------------------------|------------|--------------------------------------------------------------------------------------------------------------------------------------------------------------------------------------------------------------------------------------------------------------------------------------------------------------------------------------------------------------------------------------------------------------------------------------------------------------------------------------------------------------------------------------------------------------------------------------------------------------------------------------------------------------------------------------------------------------------------------------------------------------------------------------------------------------------------------------------------------------------------------------------------------------------------------------------------------------------------------------------------------------------------------------------------------------------------------------------------------------------------------------------------------------------------------------------------------------------------------------------------------------------------------------------------------------------------------------------------------------------------------------------------------------------------------------------------------------------------------------------------------------------|-------|
|      |       |                                                                              |                                                                                                                                                                                                                                                                                                                                                                                                                                                                                                                                                                              |            |                                                                                                                                                                                                                                                                                                                                                                                                                                                                                                                                                                                                                                                                                                                                                                                                                                                                                                                                                                                                                                                                                                                                                                                                                                                                                                                                                                                                                                                                                                                    |       |
| 6.73 | 106.4 | iron (no Fe for 10d; shoot) vs iron; phosphorus (no Fe and P for 10d; shoot) | Shoot samples of cultivar Nipponbare germinated for 2 days in distilled water and then floated for 10 days on the Yoshida nutrient solution (Yoshida et al., 1976, Laboratory Manual for Physiological Studies of Rice, Ed 3. International Rice Research Institute, Manila, The Philippines) with optimal phosphorus (0.323mM NaH <sub>2</sub> PO <sub>4</sub> ) concentration but lacking iron (FeCl <sub>3</sub> ) and citric acid. Other growth conditions: growth chamber, 12h light (450μmol photons m <sup>-2</sup> s <sup>-1</sup> ) at 30°C / 12h darkness at 22°C. | Nipponbare | Japonica ( <i>Oryza sativa</i> ssp. japonica) variety resistant to infection by the plant <i>Striga hermonthica</i> , an obligate root hemiparasite (Swarbrick et al., 2008, <i>New Phytol.</i> 179: 515-529). Nipponbare is susceptible to <i>Xanthomonas oryzae</i> pv. <i>oryzae</i> strains BAI3 (from Burkina Faso), PXO99A (from the Philippines; race 6), PXO86 (from the Philippines; race 2), T7174 (from Japan; race 1), and MAI1 (from Mali). Nipponbare is well transformable with <i>Agrobacterium tumefaciens</i> : using <i>A. tumefaciens</i> strain EHA 105, transient transformation frequency has been found to be 85.2%, stable transformation frequency 53.52% (Tie et al., 2012, <i>Plant Mol. Biol.</i> 78: 1-18). Nipponbare is susceptible to <i>Meloidogyne graminicola</i> , a root knot nematode that induces re-differentiation of root cells into multinucleate giant cells and formation of hook-like galls. Nipponbare is susceptible to <i>Magnaporthe oryzae</i> isolate FR13 (virulent isolate from France) and resistant to <i>M. oryzae</i> isolates CL3.6.7 (avirulent isolate) and BR32 (nonadapted isolate from Brazil) (Abbruscato et al., 2012, <i>Mol Plant Pathol.</i> ; Faivre-Rampant et al., 2008, <i>New Phytol.</i> 180: 899-910). This variety is sensitive to drought stress; drought index 0.54 (Wei et al., 2017, <i>Front Plant Sci.</i> 8: 473). Nipponbare is susceptible to Rice Stripe Virus (RSV) (Zhao et al., 2016, <i>New Phytol.</i> 210: 196-207). | shoot |

|          |      |       |                                                                                               |                                                                                                                                                                                                                                                                                                                                                                                                                                                                                                                                                                              |                  |                                                                                                                                                                                                                                                                                                                                                                                                                                                                                                                                                                                                                                                                                                                                                                                                                                                                                                                                                                                                                                                                                                                                                                                                                                                                                                                                                                                                                                                                                                                    |       |
|----------|------|-------|-----------------------------------------------------------------------------------------------|------------------------------------------------------------------------------------------------------------------------------------------------------------------------------------------------------------------------------------------------------------------------------------------------------------------------------------------------------------------------------------------------------------------------------------------------------------------------------------------------------------------------------------------------------------------------------|------------------|--------------------------------------------------------------------------------------------------------------------------------------------------------------------------------------------------------------------------------------------------------------------------------------------------------------------------------------------------------------------------------------------------------------------------------------------------------------------------------------------------------------------------------------------------------------------------------------------------------------------------------------------------------------------------------------------------------------------------------------------------------------------------------------------------------------------------------------------------------------------------------------------------------------------------------------------------------------------------------------------------------------------------------------------------------------------------------------------------------------------------------------------------------------------------------------------------------------------------------------------------------------------------------------------------------------------------------------------------------------------------------------------------------------------------------------------------------------------------------------------------------------------|-------|
|          | 5.98 | 63.06 | iron (no Fe for 10d; shoot) vs untreated shoot samples (sufficient Fe and P)                  | Shoot samples of cultivar Nipponbare germinated for 2 days in distilled water and then floated for 10 days on the Yoshida nutrient solution (Yoshida et al., 1976, Laboratory Manual for Physiological Studies of Rice, Ed 3. International Rice Research Institute, Manila, The Philippines) with optimal phosphorus (0.323mM NaH <sub>2</sub> PO <sub>4</sub> ) concentration but lacking iron (FeCl <sub>3</sub> ) and citric acid. Other growth conditions: growth chamber, 12h light (450μmol photons m <sup>-2</sup> s <sup>-1</sup> ) at 30°C / 12h darkness at 22°C. | Nipponbare       | Japonica ( <i>Oryza sativa</i> ssp. japonica) variety resistant to infection by the plant <i>Striga hermonthica</i> , an obligate root hemiparasite (Swarbrick et al., 2008, <i>New Phytol.</i> 179: 515-529). Nipponbare is susceptible to <i>Xanthomonas oryzae</i> pv. <i>oryzae</i> strains BAI3 (from Burkina Faso), PXO99A (from the Philippines; race 6), PXO86 (from the Philippines; race 2), T7174 (from Japan; race 1), and MAI1 (from Mali). Nipponbare is well transformable with <i>Agrobacterium tumefaciens</i> : using <i>A. tumefaciens</i> strain EHA 105, transient transformation frequency has been found to be 85.2%, stable transformation frequency 53.52% (Tie et al., 2012, <i>Plant Mol. Biol.</i> 78: 1-18). Nipponbare is susceptible to <i>Meloidogyne graminicola</i> , a root knot nematode that induces re-differentiation of root cells into multinucleate giant cells and formation of hook-like galls. Nipponbare is susceptible to <i>Magnaporthe oryzae</i> isolate FR13 (virulent isolate from France) and resistant to <i>M. oryzae</i> isolates CL3.6.7 (avirulent isolate) and BR32 (nonadapted isolate from Brazil) (Abbruscato et al., 2012, <i>Mol Plant Pathol.</i> ; Faivre-Rampant et al., 2008, <i>New Phytol.</i> 180: 899-910). This variety is sensitive to drought stress; drought index 0.54 (Wei et al., 2017, <i>Front Plant Sci.</i> 8: 473). Nipponbare is susceptible to Rice Stripe Virus (RSV) (Zhao et al., 2016, <i>New Phytol.</i> 210: 196-207). | shoot |
| OS-00096 | 5.57 | 40.69 | phosphorus (35S::PSTOL1 (20); no P fertilizer) vs phosphorus (35S::PSTOL1 (20); 60kg/ha P2O5) | Root samples of 35S::PSTOL1 (20) line grown till the heading stage on phosphorus-deficient soil from Siniloan, Luzon, the Philippines (P-Bray, 1.23 ± 0.30mgkg <sup>-1</sup> ; P-Olsen, 0.77 ± 0.46 mgkg <sup>-1</sup> ) under dry-down conditions.                                                                                                                                                                                                                                                                                                                          | 35S::PSTOL1 (20) | Phosphorus-starvation-tolerant transgenic line 20 (cv. IR64 background) carrying full-length coding region (CDS) of PSTOL1 under control of the constitutive CaMV35S promoter and NOS terminator. The PSTOL1 CDS is derived from <i>O. sativa indica</i> cultivar Kasalath. PSTOL1 (Phosphorus-starvation tolerance 1; OsPupK46-2) encodes a functional serine/threonine protein kinase and is absent in genomes of phosphorus-starvation-intolerant rice varieties such as IR64, Nipponbare. 35S::PSTOL1 (20) plants grown on phosphorus-untreated soil have larger root system and produce approx. 60% more seeds than the control IR64-null plants (segregants without the transgene). Compared to the non-transgenic IR64-null control, total root length and surface area of 35S::PSTOL1 (20) plants is increased not only under low-phosphorus but also under phosphorus-sufficient conditions (Gamuyao et al., 2012, <i>Nature</i> 488: 535-539).                                                                                                                                                                                                                                                                                                                                                                                                                                                                                                                                                           | roots |

|          |      |       |                                                                                 |                                                                                                                                                                                                                                                                                                                                  |           |                                                                                                                                                                                                          |       |
|----------|------|-------|---------------------------------------------------------------------------------|----------------------------------------------------------------------------------------------------------------------------------------------------------------------------------------------------------------------------------------------------------------------------------------------------------------------------------|-----------|----------------------------------------------------------------------------------------------------------------------------------------------------------------------------------------------------------|-------|
|          | 4.78 | 19.27 | phosphorus (IR64-null; no P fertilizer) vs phosphorus (IR64-null; 60kg/ha P2O5) | Root samples of IR64-null line grown till the heading stage on phosphorus-deficient soil from Siniloan, Luzon, the Philippines (P-Bray, $1.23 \pm 0.30$ mgkg <sup>-1</sup> ; P-Olsen, $0.77 \pm 0.46$ mgkg <sup>-1</sup> ) under dry-down conditions.                                                                            | IR64-null | Non-transgenic, phosphorus-starvation-intolerant line from the segregating progeny of a transformant heterozygous for the 35S::PSTOL1 transgene; sibling of the transgenic 35S::PSTOL1 (20) line.        | roots |
| OS-00003 | 4.39 | 21.6  | arsenate (Azucena) vs untreated root samples (Azucena)                          | Root samples of rice variety Azucena grown for 7 days in hydroponics on phosphate-free nutrient solution containing 0.1mM Mg <sup>2+</sup> and SO <sub>4</sub> <sup>2-</sup> , 0.2mM Ca <sup>2+</sup> and K <sup>+</sup> , 0.6mM NO <sub>3</sub> <sup>-</sup> , and 1ppm (13.3μM) arsenate (Na <sub>2</sub> HAsO <sub>4</sub> ). | Azucena   | Traditional japonica ( <i>Oryza sativa</i> ssp. japonica) upland cultivar; origin: the Philippines. Azucena is resistant to aluminum stress (Al <sup>3+</sup> ) (Arbelaez et al., 2017, Plant Direct 1). | roots |
|          | 4.26 | 19.28 | arsenate (Bala) vs untreated root samples (Bala)                                | Root samples of rice variety Bala grown for 7 days in hydroponics on phosphate-free nutrient solution containing 0.1mM Mg <sup>2+</sup> and SO <sub>4</sub> <sup>2-</sup> , 0.2mM Ca <sup>2+</sup> and K <sup>+</sup> , 0.6mM NO <sub>3</sub> <sup>-</sup> , and 1ppm (13.3μM) arsenate (Na <sub>2</sub> HAsO <sub>4</sub> ).    | Bala      | Improved indica upland cultivar; origin: Eastern India.                                                                                                                                                  | roots |

LOC\_Os05g31670.1

|          |      |      |                                                                                          |                                                                                                                                                                                                                                                                                                                                                                                                                                                                                                                           |                |                                                                                                                                                                                                                                                                                                                                                                                                                                                                                                                                                                                                                                                                                                                                                                                                                                                                                                                                                                                                        |       |
|----------|------|------|------------------------------------------------------------------------------------------|---------------------------------------------------------------------------------------------------------------------------------------------------------------------------------------------------------------------------------------------------------------------------------------------------------------------------------------------------------------------------------------------------------------------------------------------------------------------------------------------------------------------------|----------------|--------------------------------------------------------------------------------------------------------------------------------------------------------------------------------------------------------------------------------------------------------------------------------------------------------------------------------------------------------------------------------------------------------------------------------------------------------------------------------------------------------------------------------------------------------------------------------------------------------------------------------------------------------------------------------------------------------------------------------------------------------------------------------------------------------------------------------------------------------------------------------------------------------------------------------------------------------------------------------------------------------|-------|
| OS-00239 | 1.59 | 3.03 | phosphorus (Dular; 1μM Pi; root)<br>phosphorus (Dular; 320μM Pi; root)                   | Root samples of 15-day-old Dular seedlings grown in a phosphate deficient nutrient solution (1μM Pi); the solution (pH 5.5) was exchanged every 24h. Other growth conditions: growth chamber, 16h light (250-300μmol photons m <sup>-2</sup> s <sup>-1</sup> ) at 30°C / 8h darkness at 28°C cycles, 70% relative humidity. The nutrient solution as described in (Yoshida et al., 1976, Laboratory Manual for Physiological Studies of Rice, Ed 3, International Rice Research Institute, Manila, Philippines).          | Dular          | Traditional <i>Oryza sativa</i> ssp. indica variety with very low yield potential (7-22q/ha) and high tolerance to low phosphate (Pi) content in the soil. Dular is more efficient in Pi utilization and better preserves root growth under Pi-limiting conditions than a low Pi-sensitive variety, Pusa Basmati 1. When plants were grown under low Pi (1μM) for 15 days, Dular root length was 9.38 ± 0.17cm while Pusa Basmati 1 root length was 7.41 ± 0.15cm. Under low Pi, Dular produced more and longer lateral roots than Pusa Basmati 1. Even though under sufficient Pi root and shoot Pi content was lower in Dular than in Pusa Basmati 1, under low Pi root and shoot Pi content was higher in Dular than in Pusa Basmati 1 (Mehra et al., 2016, Front Plant Sci. 6: 1184). Dular belongs to wide-compatibility variety (WCV) rice germplasm, i.e. Dular is able to produce fertile hybrids when crossed to indica or japonica varieties (Wang et al., 1998, Theor Appl Genet. 97: 407). | roots |
|          | 1.32 | 2.43 | phosphorus (Pusa Basmati 1; 1μM Pi; root) vs phosphorus (Pusa Basmati 1; 320μM Pi; root) | Root samples of 15-day-old Pusa Basmati 1 seedlings grown in a phosphate deficient nutrient solution (1μM Pi); the solution (pH 5.5) was exchanged every 24h. Other growth conditions: growth chamber, 16h light (250-300μmol photons m <sup>-2</sup> s <sup>-1</sup> ) at 30°C / 8h darkness at 28°C cycles, 70% relative humidity. The nutrient solution as described in (Yoshida et al., 1976, Laboratory Manual for Physiological Studies of Rice, Ed 3, International Rice Research Institute, Manila, Philippines). | Pusa Basmati 1 | Semi-dwarf aromatic (Evolved Basmati) cultivar developed by The Indian Agricultural Research Institute (IARI), released in 1989. Low number of seeds (approx. 181) per panicle (Deshmukh et al., 2010, Funct Integr Genomics 10: 339-47). Pusa Basmati 1 is susceptible to <i>Magnaporthe oryzae</i> strain Mo-nwi-53 (Jain et al., 2017, Front Plant Sci. 8: 93). Pusa Basmati 1 is sensitive to low phosphate (Pi) content in the soil (Mehra et al., 2016, Front Plant Sci. 6: 1184).                                                                                                                                                                                                                                                                                                                                                                                                                                                                                                               | roots |

|          |       |       |                                                                                     |                                                                                                                                                                                                                                                                                                                                                                                                                                                                                                                      |                  |                                                                                                                                                                                                                                                                                                                                                                                                                                                                                                                                                                                                                                                                                                                                                                                                                                                                                                                                                                                                                                        |       |
|----------|-------|-------|-------------------------------------------------------------------------------------|----------------------------------------------------------------------------------------------------------------------------------------------------------------------------------------------------------------------------------------------------------------------------------------------------------------------------------------------------------------------------------------------------------------------------------------------------------------------------------------------------------------------|------------------|----------------------------------------------------------------------------------------------------------------------------------------------------------------------------------------------------------------------------------------------------------------------------------------------------------------------------------------------------------------------------------------------------------------------------------------------------------------------------------------------------------------------------------------------------------------------------------------------------------------------------------------------------------------------------------------------------------------------------------------------------------------------------------------------------------------------------------------------------------------------------------------------------------------------------------------------------------------------------------------------------------------------------------------|-------|
| OS-00096 | -0.73 | -2.03 | phosphorus (35S::PSTOL1 (20); 60kg/ha P2O5) vs phosphorus (IR64-null; 60kg/ha P2O5) | Root samples of 35S::PSTOL1 (20) line grown till the mid-tillering stage on soil from Siniloan, Luzon, the Philippines (phosphorus-deficient; P-Bray, $1.23 \pm 0.30$ mgkg <sup>-1</sup> ; P-Olsen, $0.77 \pm 0.46$ mgkg <sup>-1</sup> ) fertilized with phosphorus (equivalent of 60kg P2O5 ha <sup>-1</sup> ), well watered, aerobic.                                                                                                                                                                              | 35S::PSTOL1 (20) | Phosphorus-starvation-tolerant transgenic line 20 (cv. IR64 background) carrying full-length coding region (CDS) of PSTOL1 under control of the constitutive CaMV35S promoter and NOS terminator. The PSTOL1 CDS is derived from <i>O. sativa indica</i> cultivar Kasalath. PSTOL1 (Phosphorus-starvation tolerance 1; OsPupK46-2) encodes a functional serine/threonine protein kinase and is absent in genomes of phosphorus-starvation-intolerant rice varieties such as IR64, Nipponbare. 35S::PSTOL1 (20) plants grown on phosphorus-unfertilized soil have larger root system and produce approx. 60% more seeds than the control IR64-null plants (segregants without the transgene). Compared to the non-transgenic IR64-null control, total root length and surface area of 35S::PSTOL1 (20) plants is increased not only under low-phosphorus but also under phosphorus-sufficient conditions (Gamuyao et al., 2012, Nature 488: 535-539).                                                                                   | roots |
|          | -1.06 | -2.26 | phosphorus (Dular; 320μM Pi; shoot) vs phosphorus (Pusa Basmati 1; 320μM Pi; shoot) | Shoot samples of 15-day-old Dular seedlings grown in a phosphate sufficient nutrient solution (320μM Pi); the solution (pH 5.5) was exchanged every 24h. Other growth conditions: growth chamber, 16h light (250-300μmol photons m <sup>-2</sup> s <sup>-1</sup> ) at 30°C / 8h darkness at 28°C cycles, 70% relative humidity. The nutrient solution as described in (Yoshida et al., 1976, Laboratory Manual for Physiological Studies of Rice, Ed 3, International Rice Research Institute, Manila, Philippines). | Dular            | Traditional <i>Oryza sativa</i> ssp. <i>indica</i> variety with very low yield potential (7-22q/ha) and high tolerance to low phosphate (Pi) content in the soil. Dular is more efficient in Pi utilization and better preserves root growth under Pi-limiting conditions than a low Pi-sensitive variety, Pusa Basmati 1. When plants were grown under low Pi (1μM) for 15 days, Dular root length was $9.38 \pm 0.17$ cm while Pusa Basmati 1 root length was $7.41 \pm 0.15$ cm. Under low Pi, Dular produced more and longer lateral roots than Pusa Basmati 1. Even though under sufficient Pi root and shoot Pi content was lower in Dular than in Pusa Basmati 1, under low Pi root and shoot Pi content was higher in Dular than in Pusa Basmati 1 (Mehra et al., 2016, Front Plant Sci. 6: 1184). Dular belongs to wide-compatibility variety (WCV) rice germplasms, i.e. Dular is able to produce fertile hybrids when crossed to <i>indica</i> or <i>japonica</i> varieties (Wang et al., 1998, Theor Appl Genet. 97: 407). | shoot |



|          |       |       |                                                                                               |                                                                                                                                                                                                                                                                                                                                                                                                                                                                                                                                 |       |                                                                                                                                                                                                                                                                                                                                                                                                                                                                                                                                                                                                                                                                                                                                                                                                                                                                                                                                                                                                                      |       |
|----------|-------|-------|-----------------------------------------------------------------------------------------------|---------------------------------------------------------------------------------------------------------------------------------------------------------------------------------------------------------------------------------------------------------------------------------------------------------------------------------------------------------------------------------------------------------------------------------------------------------------------------------------------------------------------------------|-------|----------------------------------------------------------------------------------------------------------------------------------------------------------------------------------------------------------------------------------------------------------------------------------------------------------------------------------------------------------------------------------------------------------------------------------------------------------------------------------------------------------------------------------------------------------------------------------------------------------------------------------------------------------------------------------------------------------------------------------------------------------------------------------------------------------------------------------------------------------------------------------------------------------------------------------------------------------------------------------------------------------------------|-------|
| OS-00239 | -1.12 | -2.19 | phosphorus (Dular; 1 $\mu$ M Pi; root) vs phosphorus (Pusa Basmati 1; 1 $\mu$ M Pi; root)     | Root samples of 15-day-old Dular seedlings grown in a phosphate deficient nutrient solution (1 $\mu$ M Pi); the solution (pH 5.5) was exchanged every 24h. Other growth conditions: growth chamber, 16h light (250-300 $\mu$ mol photons m <sup>-2</sup> s <sup>-1</sup> ) at 30°C / 8h darkness at 28°C cycles, 70% relative humidity. The nutrient solution as described in (Yoshida et al., 1976, Laboratory Manual for Physiological Studies of Rice, Ed 3, International Rice Research Institute, Manila, Philippines).    | Dular | Traditional <i>Oryza sativa</i> ssp. indica variety with very low yield potential (7-22q/ha) and high tolerance to low phosphate (Pi) content in the soil. Dular is more efficient in Pi utilization and better preserves root growth under Pi-limiting conditions than a low Pi-sensitive variety, Pusa Basmati 1. When plants were grown under low Pi (1 $\mu$ M) for 15 days, Dular root length was 9.38 $\pm$ 0.17cm while Pusa Basmati 1 root length was 7.41 $\pm$ 0.15cm. Under low Pi, Dular produced more and longer lateral roots than Pusa Basmati 1. Even though under sufficient Pi root and shoot Pi content was lower in Dular than in Pusa Basmati 1, under low Pi root and shoot Pi content was higher in Dular than in Pusa Basmati 1 (Mehra et al., 2016, Front Plant Sci. 6: 1184). Dular belongs to wide-compatibility variety (WCV) rice germplasm, i.e. Dular is able to produce fertile hybrids when crossed to indica or japonica varieties (Wang et al., 1998, Theor Appl Genet. 97: 407). | shoot |
|          | -1.4  | -2.73 | phosphorus (Dular; 320 $\mu$ M Pi; root) vs phosphorus (Pusa Basmati 1; 320 $\mu$ M Pi; root) | Root samples of 15-day-old Dular seedlings grown in a phosphate sufficient nutrient solution (320 $\mu$ M Pi); the solution (pH 5.5) was exchanged every 24h. Other growth conditions: growth chamber, 16h light (250-300 $\mu$ mol photons m <sup>-2</sup> s <sup>-1</sup> ) at 30°C / 8h darkness at 28°C cycles, 70% relative humidity. The nutrient solution as described in (Yoshida et al., 1976, Laboratory Manual for Physiological Studies of Rice, Ed 3, International Rice Research Institute, Manila, Philippines). | Dular | Traditional <i>Oryza sativa</i> ssp. indica variety with very low yield potential (7-22q/ha) and high tolerance to low phosphate (Pi) content in the soil. Dular is more efficient in Pi utilization and better preserves root growth under Pi-limiting conditions than a low Pi-sensitive variety, Pusa Basmati 1. When plants were grown under low Pi (1 $\mu$ M) for 15 days, Dular root length was 9.38 $\pm$ 0.17cm while Pusa Basmati 1 root length was 7.41 $\pm$ 0.15cm. Under low Pi, Dular produced more and longer lateral roots than Pusa Basmati 1. Even though under sufficient Pi root and shoot Pi content was lower in Dular than in Pusa Basmati 1, under low Pi root and shoot Pi content was higher in Dular than in Pusa Basmati 1 (Mehra et al., 2016, Front Plant Sci. 6: 1184). Dular belongs to wide-compatibility variety (WCV) rice germplasm, i.e. Dular is able to produce fertile hybrids when crossed to indica or japonica varieties (Wang et al., 1998, Theor Appl Genet. 97: 407). | shoot |

|          |       |       |                                                                           |                                                                                                                                                                                                                                                                                                                                                                                                                                                                                                                                                                                                                                                                                                                                           |             |                                                         |          |
|----------|-------|-------|---------------------------------------------------------------------------|-------------------------------------------------------------------------------------------------------------------------------------------------------------------------------------------------------------------------------------------------------------------------------------------------------------------------------------------------------------------------------------------------------------------------------------------------------------------------------------------------------------------------------------------------------------------------------------------------------------------------------------------------------------------------------------------------------------------------------------------|-------------|---------------------------------------------------------|----------|
| OS-00091 | -2.13 | -4.37 | phosphorus (low Pi for 48h) vs untreated seedling samples (sufficient Pi) | Seedling samples of cultivar Zhonghua 10 grown for 7 days in a nutrient solution with sufficient phosphate (0.323mM NaH <sub>2</sub> PO <sub>4</sub> ), then transferred to low phosphate (0.016 mM NaH <sub>2</sub> PO <sub>4</sub> ) for 48h. Other components of the nutrient solution (pH 5.5): 1.425mM NH <sub>4</sub> NO <sub>3</sub> , 0.513mM K <sub>2</sub> SO <sub>4</sub> , 0.998mM CaCl <sub>2</sub> , 1.643mM MgSO <sub>4</sub> , 0.168mM Na <sub>2</sub> SiO <sub>3</sub> , 0.125mM Fe-EDTA, 0.019mM H <sub>3</sub> BO <sub>3</sub> , 0.009mM MnCl <sub>2</sub> , 0.155mM CuSO <sub>4</sub> , 0.152mM ZnSO <sub>4</sub> , 0.075mM Na <sub>2</sub> MoO <sub>4</sub> . Other conditions: 16h light at 30°C / 8h dark at 22°C. | Zhonghua 10 | Japonica ( <i>Oryza sativa</i> ssp. japonica) cultivar. | seedling |
|----------|-------|-------|---------------------------------------------------------------------------|-------------------------------------------------------------------------------------------------------------------------------------------------------------------------------------------------------------------------------------------------------------------------------------------------------------------------------------------------------------------------------------------------------------------------------------------------------------------------------------------------------------------------------------------------------------------------------------------------------------------------------------------------------------------------------------------------------------------------------------------|-------------|---------------------------------------------------------|----------|

|  |  |          |       |       |                                                                                                                         |                                                                                                                                                                                                                                                                                                                                                                                                                                                                                                                                                                                                                                                                                                                                           |                  |                                                                                                                                                                                                                                                                                                                                                                                                                                                                                                                                                                                                                                                                                                                                                                                                                                                                                                                                                      |          |
|--|--|----------|-------|-------|-------------------------------------------------------------------------------------------------------------------------|-------------------------------------------------------------------------------------------------------------------------------------------------------------------------------------------------------------------------------------------------------------------------------------------------------------------------------------------------------------------------------------------------------------------------------------------------------------------------------------------------------------------------------------------------------------------------------------------------------------------------------------------------------------------------------------------------------------------------------------------|------------------|------------------------------------------------------------------------------------------------------------------------------------------------------------------------------------------------------------------------------------------------------------------------------------------------------------------------------------------------------------------------------------------------------------------------------------------------------------------------------------------------------------------------------------------------------------------------------------------------------------------------------------------------------------------------------------------------------------------------------------------------------------------------------------------------------------------------------------------------------------------------------------------------------------------------------------------------------|----------|
|  |  | OS-00091 | -2.16 | -4.49 | phosphorus (low Pi for 72h) vs untreated seedling samples (sufficient Pi)                                               | Seedling samples of cultivar Zhonghua 10 grown for 7 days in a nutrient solution with sufficient phosphate (0.323mM NaH <sub>2</sub> PO <sub>4</sub> ), then transferred to low phosphate (0.016 mM NaH <sub>2</sub> PO <sub>4</sub> ) for 72h. Other components of the nutrient solution (pH 5.5): 1.425mM NH <sub>4</sub> NO <sub>3</sub> , 0.513mM K <sub>2</sub> SO <sub>4</sub> , 0.998mM CaCl <sub>2</sub> , 1.643mM MgSO <sub>4</sub> , 0.168mM Na <sub>2</sub> SiO <sub>3</sub> , 0.125mM Fe-EDTA, 0.019mM H <sub>3</sub> BO <sub>3</sub> , 0.009mM MnCl <sub>2</sub> , 0.155mM CuSO <sub>4</sub> , 0.152mM ZnSO <sub>4</sub> , 0.075mM Na <sub>2</sub> MoO <sub>4</sub> . Other conditions: 16h light at 30°C / 8h dark at 22°C. | Zhonghua 10      | Japonica ( <i>Oryza sativa</i> ssp. japonica) cultivar.                                                                                                                                                                                                                                                                                                                                                                                                                                                                                                                                                                                                                                                                                                                                                                                                                                                                                              | seedling |
|  |  | OS-00096 | 1.62  | 3.07  | phosphorus (35S::PSTOL1 (20); no P fertilizer) vs phosphorus (35S::PSTOL1 (20); 60kg/ha P <sub>2</sub> O <sub>5</sub> ) | Root samples of 35S::PSTOL1 (20) line grown till the heading stage on phosphorus-deficient soil from Siniloan, Luzon, the Philippines (P-Bray, 1.23 ± 0.30mgkg <sup>-1</sup> ; P-Olsen, 0.77 ± 0.46 mgkg <sup>-1</sup> ) under dry-down conditions.                                                                                                                                                                                                                                                                                                                                                                                                                                                                                       | 35S::PSTOL1 (20) | Phosphorus-starvation-tolerant transgenic line 20 (cv. IR64 background) carrying full-length coding region (CDS) of PSTOL1 under control of the constitutive CaMV35S promoter and NOS terminator. The PSTOL1 CDS is derived from <i>O. sativa</i> indica cultivar Kasalath. PSTOL1 (Phosphorus-starvation tolerance 1; OsPupK46-2) encodes a functional serine/threonine protein kinase and is absent in genomes of phosphorus-starvation-intolerant rice varieties such as IR64, Nipponbare. 35S::PSTOL1 (20) plants grown on phosphorus-unfertilized soil have larger root system and produce approx. 60% more seeds than the control IR64-null plants (segregants without the transgene). Compared to the non-transgenic IR64-null control, total root length and surface area of 35S::PSTOL1 (20) plants is increased not only under low-phosphorus but also under phosphorus-sufficient conditions (Gamuyao et al., 2012, Nature 488: 535-539). | roots    |

|                  |          |      |       |                                                                                 |                                                                                                                                                                                                                                                                                                                                  |           |                                                                                                                                                                                                          |       |
|------------------|----------|------|-------|---------------------------------------------------------------------------------|----------------------------------------------------------------------------------------------------------------------------------------------------------------------------------------------------------------------------------------------------------------------------------------------------------------------------------|-----------|----------------------------------------------------------------------------------------------------------------------------------------------------------------------------------------------------------|-------|
| LOC_Os05g35110.1 |          | 1.62 | 3.06  | phosphorus (IR64-null; no P fertilizer) vs phosphorus (IR64-null; 60kg/ha P2O5) | Root samples of IR64-null line grown till the heading stage on phosphorus-deficient soil from Siniloan, Luzon, the Philippines (P-Bray, $1.23 \pm 0.30$ mgkg <sup>-1</sup> ; P-Olsen, $0.77 \pm 0.46$ mgkg <sup>-1</sup> ) under dry-down conditions.                                                                            | IR64-null | Non-transgenic, phosphorus-starvation-intolerant line from the segregating progeny of a transformant heterozygous for the 35S::PSTOL1 transgene; sibling of the transgenic 35S::PSTOL1 (20) line.        | roots |
|                  |          | -1.3 | -2.47 | arsenate (Azucena) vs untreated root samples (Azucena)                          | Root samples of rice variety Azucena grown for 7 days in hydroponics on phosphate-free nutrient solution containing 0.1mM Mg <sup>2+</sup> and SO <sub>4</sub> <sup>2-</sup> , 0.2mM Ca <sup>2+</sup> and K <sup>+</sup> , 0.6mM NO <sub>3</sub> <sup>-</sup> , and 1ppm (13.3μM) arsenate (Na <sub>2</sub> HAsO <sub>4</sub> ). | Azucena   | Traditional japonica ( <i>Oryza sativa</i> ssp. japonica) upland cultivar; origin: the Philippines. Azucena is resistant to aluminum stress (Al <sup>3+</sup> ) (Arbelaez et al., 2017, Plant Direct 1). | roots |
|                  | OS-00003 | 4.05 | 16.57 | arsenate (Bala) vs untreated root samples (Bala)                                | Root samples of rice variety Bala grown for 7 days in hydroponics on phosphate-free nutrient solution containing 0.1mM Mg <sup>2+</sup> and SO <sub>4</sub> <sup>2-</sup> , 0.2mM Ca <sup>2+</sup> and K <sup>+</sup> , 0.6mM NO <sub>3</sub> <sup>-</sup> , and 1ppm (13.3μM) arsenate (Na <sub>2</sub> HAsO <sub>4</sub> ).    | Bala      | Improved indica upland cultivar; origin: Eastern India.                                                                                                                                                  | roots |

|          |      |      |                                                                                               |                                                                                                                                                                                                                                                              |                  |                                                                                                                                                                                                                                                                                                                                                                                                                                                                                                                                                                                                                                                                                                                                                                                                                                                                                                                                                      |       |
|----------|------|------|-----------------------------------------------------------------------------------------------|--------------------------------------------------------------------------------------------------------------------------------------------------------------------------------------------------------------------------------------------------------------|------------------|------------------------------------------------------------------------------------------------------------------------------------------------------------------------------------------------------------------------------------------------------------------------------------------------------------------------------------------------------------------------------------------------------------------------------------------------------------------------------------------------------------------------------------------------------------------------------------------------------------------------------------------------------------------------------------------------------------------------------------------------------------------------------------------------------------------------------------------------------------------------------------------------------------------------------------------------------|-------|
| OS-00096 | 1.9  | 3.88 | phosphorus (35S::PSTOL1 (20); no P fertilizer) vs phosphorus (35S::PSTOL1 (20); 60kg/ha P2O5) | Root samples of 35S::PSTOL1 (20) line grown till the heading stage on phosphorus-deficient soil from Siniloan, Luzon, the Philippines (P-Bray, $1.23 \pm 0.30$ mgkg <sup>-1</sup> ; P-Olsen, $0.77 \pm 0.46$ mgkg <sup>-1</sup> ) under dry-down conditions. | 35S::PSTOL1 (20) | Phosphorus-starvation-tolerant transgenic line 20 (cv. IR64 background) carrying full-length coding region (CDS) of PSTOL1 under control of the constitutive CaMV35S promoter and NOS terminator. The PSTOL1 CDS is derived from <i>O. sativa indica</i> cultivar Kasalath. PSTOL1 (Phosphorus-starvation tolerance 1; OsPupK46-2) encodes a functional serine/threonine protein kinase and is absent in genomes of phosphorus-starvation-intolerant rice varieties such as IR64, Nipponbare. 35S::PSTOL1 (20) plants grown on phosphorus-unfertilized soil have larger root system and produce approx. 60% more seeds than the control IR64-null plants (segregants without the transgene). Compared to the non-transgenic IR64-null control, total root length and surface area of 35S::PSTOL1 (20) plants is increased not only under low-phosphorus but also under phosphorus-sufficient conditions (Gamuyao et al., 2012, Nature 488: 535-539). | roots |
|          | 1.65 | 3.19 | phosphorus (IR64-null; no P fertilizer) vs phosphorus (IR64-null; 60kg/ha P2O5)               | Root samples of IR64-null line grown till the heading stage on phosphorus-deficient soil from Siniloan, Luzon, the Philippines (P-Bray, $1.23 \pm 0.30$ mgkg <sup>-1</sup> ; P-Olsen, $0.77 \pm 0.46$ mgkg <sup>-1</sup> ) under dry-down conditions.        | IR64-null        | Non-transgenic, phosphorus-starvation-intolerant line from the segregating progeny of a transformant heterozygous for the 35S::PSTOL1 transgene; sibling of the transgenic 35S::PSTOL1 (20) line.                                                                                                                                                                                                                                                                                                                                                                                                                                                                                                                                                                                                                                                                                                                                                    | roots |

qRPPUE5.12

LOC\_Os05g35140.1

|  |      |      |                                                                                   |                                                                                                                                                                                                                                                                                                                                                                                                                                                                                                                        |            |                                                                                                                                                                                                                                                                                                                                                                                                                                                                                                                                                                                                                                                                                                                                                                                                                                                                                                                                                                                                                                                                                                                                                                                                                                                                                                                                                                                                                                                                                                                    |       |
|--|------|------|-----------------------------------------------------------------------------------|------------------------------------------------------------------------------------------------------------------------------------------------------------------------------------------------------------------------------------------------------------------------------------------------------------------------------------------------------------------------------------------------------------------------------------------------------------------------------------------------------------------------|------------|--------------------------------------------------------------------------------------------------------------------------------------------------------------------------------------------------------------------------------------------------------------------------------------------------------------------------------------------------------------------------------------------------------------------------------------------------------------------------------------------------------------------------------------------------------------------------------------------------------------------------------------------------------------------------------------------------------------------------------------------------------------------------------------------------------------------------------------------------------------------------------------------------------------------------------------------------------------------------------------------------------------------------------------------------------------------------------------------------------------------------------------------------------------------------------------------------------------------------------------------------------------------------------------------------------------------------------------------------------------------------------------------------------------------------------------------------------------------------------------------------------------------|-------|
|  | 1.05 | 2.07 | phosphorus (no P for 10d; shoot) vs iron; phosphorus (no Fe and P for 10d; shoot) | Shoot samples of cultivar Nipponbare germinated for 2 days in distilled water and then floated for 10 days on the Yoshida nutrient solution (Yoshida et al., 1976, Laboratory Manual for Physiological Studies of Rice, Ed 3. International Rice Research Institute, Manila, The Philippines) with optimal iron (0.036mM FeCl3) concentration but lacking phosphorus (NaH2PO4). Other growth conditions: growth chamber, 12h light (450 mmol photons m <sup>-2</sup> s <sup>-1</sup> ) at 30°C / 12h darkness at 22°C. | Nipponbare | Japonica ( <i>Oryza sativa</i> ssp. japonica) variety resistant to infection by the plant <i>Striga hermonthica</i> , an obligate root hemiparasite (Swarbrick et al., 2008, <i>New Phytol.</i> 179: 515-529). Nipponbare is susceptible to <i>Xanthomonas oryzae</i> pv. <i>oryzae</i> strains BAI3 (from Burkina Faso), PXO99A (from the Philippines; race 6), PXO86 (from the Philippines; race 2), T7174 (from Japan; race 1), and MAI1 (from Mali). Nipponbare is well transformable with <i>Agrobacterium tumefaciens</i> : using <i>A. tumefaciens</i> strain EHA 105, transient transformation frequency has been found to be 85.2%, stable transformation frequency 53.52% (Tie et al., 2012, <i>Plant Mol. Biol.</i> 78: 1-18). Nipponbare is susceptible to <i>Meloidogyne graminicola</i> , a root knot nematode that induces re-differentiation of root cells into multinucleate giant cells and formation of hook-like galls. Nipponbare is susceptible to <i>Magnaporthe oryzae</i> isolate FR13 (virulent isolate from France) and resistant to <i>M. oryzae</i> isolates CL3.6.7 (avirulent isolate) and BR32 (nonadapted isolate from Brazil) (Abbruscato et al., 2012, <i>Mol Plant Pathol.</i> ; Faivre-Rampant et al., 2008, <i>New Phytol.</i> 180: 899-910). This variety is sensitive to drought stress; drought index 0.54 (Wei et al., 2017, <i>Front Plant Sci.</i> 8: 473). Nipponbare is susceptible to Rice Stripe Virus (RSV) (Zhao et al., 2016, <i>New Phytol.</i> 210: 196-207). | shoot |
|--|------|------|-----------------------------------------------------------------------------------|------------------------------------------------------------------------------------------------------------------------------------------------------------------------------------------------------------------------------------------------------------------------------------------------------------------------------------------------------------------------------------------------------------------------------------------------------------------------------------------------------------------------|------------|--------------------------------------------------------------------------------------------------------------------------------------------------------------------------------------------------------------------------------------------------------------------------------------------------------------------------------------------------------------------------------------------------------------------------------------------------------------------------------------------------------------------------------------------------------------------------------------------------------------------------------------------------------------------------------------------------------------------------------------------------------------------------------------------------------------------------------------------------------------------------------------------------------------------------------------------------------------------------------------------------------------------------------------------------------------------------------------------------------------------------------------------------------------------------------------------------------------------------------------------------------------------------------------------------------------------------------------------------------------------------------------------------------------------------------------------------------------------------------------------------------------------|-------|

|          |       |       |                                                                                                                           |                                                                                                                                                                                                                                                                                                                                                                                                                                                                                                                           |            |                                                                                                                                                                                                                                                                                                                                                                                                                                                                                                                                                                                                                                                                                                                                                                                                                                                                                                                                                                                                                                                                                                                                                                                                                                                                                                                                                                                                                                                                                                                    |       |
|----------|-------|-------|---------------------------------------------------------------------------------------------------------------------------|---------------------------------------------------------------------------------------------------------------------------------------------------------------------------------------------------------------------------------------------------------------------------------------------------------------------------------------------------------------------------------------------------------------------------------------------------------------------------------------------------------------------------|------------|--------------------------------------------------------------------------------------------------------------------------------------------------------------------------------------------------------------------------------------------------------------------------------------------------------------------------------------------------------------------------------------------------------------------------------------------------------------------------------------------------------------------------------------------------------------------------------------------------------------------------------------------------------------------------------------------------------------------------------------------------------------------------------------------------------------------------------------------------------------------------------------------------------------------------------------------------------------------------------------------------------------------------------------------------------------------------------------------------------------------------------------------------------------------------------------------------------------------------------------------------------------------------------------------------------------------------------------------------------------------------------------------------------------------------------------------------------------------------------------------------------------------|-------|
| OS-00036 | -1.34 | -2.54 | iron;<br>phosphorus<br>(no Fe and P<br>for 10d;<br>shoot) vs<br>untreated<br>shoot<br>samples<br>(sufficient<br>Fe and P) | Shoot samples of cultivar Nipponbare germinated for 2 days in distilled water and then floated for 10 days on the Yoshida nutrient solution (Yoshida et al., 1976, Laboratory Manual for Physiological Studies of Rice, Ed 3. International Rice Research Institute, Manila, The Philippines) lacking iron (FeCl <sub>3</sub> ) and phosphorus (NaH <sub>2</sub> PO <sub>4</sub> ). Other growth conditions: growth chamber, 12h light (450μmol photons m <sup>-2</sup> s <sup>-1</sup> ) at 30°C / 12h darkness at 22°C. | Nipponbare | Japonica ( <i>Oryza sativa</i> ssp. japonica) variety resistant to infection by the plant <i>Striga hermonthica</i> , an obligate root hemiparasite (Swarbrick et al., 2008, <i>New Phytol.</i> 179: 515-529). Nipponbare is susceptible to <i>Xanthomonas oryzae</i> pv. <i>oryzae</i> strains BAI3 (from Burkina Faso), PXO99A (from the Philippines; race 6), PXO86 (from the Philippines; race 2), T7174 (from Japan; race 1), and MAI1 (from Mali). Nipponbare is well transformable with <i>Agrobacterium tumefaciens</i> : using <i>A. tumefaciens</i> strain EHA 105, transient transformation frequency has been found to be 85.2%, stable transformation frequency 53.52% (Tie et al., 2012, <i>Plant Mol. Biol.</i> 78: 1-18). Nipponbare is susceptible to <i>Meloidogyne graminicola</i> , a root knot nematode that induces re-differentiation of root cells into multinucleate giant cells and formation of hook-like galls. Nipponbare is susceptible to <i>Magnaporthe oryzae</i> isolate FR13 (virulent isolate from France) and resistant to <i>M. oryzae</i> isolates CL3.6.7 (avirulent isolate) and BR32 (nonadapted isolate from Brazil) (Abbruscato et al., 2012, <i>Mol Plant Pathol.</i> ; Faivre-Rampant et al., 2008, <i>New Phytol.</i> 180: 899-910). This variety is sensitive to drought stress; drought index 0.54 (Wei et al., 2017, <i>Front Plant Sci.</i> 8: 473). Nipponbare is susceptible to Rice Stripe Virus (RSV) (Zhao et al., 2016, <i>New Phytol.</i> 210: 196-207). | shoot |
|----------|-------|-------|---------------------------------------------------------------------------------------------------------------------------|---------------------------------------------------------------------------------------------------------------------------------------------------------------------------------------------------------------------------------------------------------------------------------------------------------------------------------------------------------------------------------------------------------------------------------------------------------------------------------------------------------------------------|------------|--------------------------------------------------------------------------------------------------------------------------------------------------------------------------------------------------------------------------------------------------------------------------------------------------------------------------------------------------------------------------------------------------------------------------------------------------------------------------------------------------------------------------------------------------------------------------------------------------------------------------------------------------------------------------------------------------------------------------------------------------------------------------------------------------------------------------------------------------------------------------------------------------------------------------------------------------------------------------------------------------------------------------------------------------------------------------------------------------------------------------------------------------------------------------------------------------------------------------------------------------------------------------------------------------------------------------------------------------------------------------------------------------------------------------------------------------------------------------------------------------------------------|-------|

|                  |  |  |  |                                                                              |                                                                                                                                                                                                                                                                                                                                                                                                                                                                                                                                                                              |            |                                                                                                                                                                                                                                                                                                                                                                                                                                                                                                                                                                                                                                                                                                                                                                                                                                                                                                                                                                                                                                                                                                                                                                                                                                                                                                                                                                                                                                                                                                                    |       |
|------------------|--|--|--|------------------------------------------------------------------------------|------------------------------------------------------------------------------------------------------------------------------------------------------------------------------------------------------------------------------------------------------------------------------------------------------------------------------------------------------------------------------------------------------------------------------------------------------------------------------------------------------------------------------------------------------------------------------|------------|--------------------------------------------------------------------------------------------------------------------------------------------------------------------------------------------------------------------------------------------------------------------------------------------------------------------------------------------------------------------------------------------------------------------------------------------------------------------------------------------------------------------------------------------------------------------------------------------------------------------------------------------------------------------------------------------------------------------------------------------------------------------------------------------------------------------------------------------------------------------------------------------------------------------------------------------------------------------------------------------------------------------------------------------------------------------------------------------------------------------------------------------------------------------------------------------------------------------------------------------------------------------------------------------------------------------------------------------------------------------------------------------------------------------------------------------------------------------------------------------------------------------|-------|
|                  |  |  |  | iron (no Fe for 10d; shoot) vs untreated shoot samples (sufficient Fe and P) | Shoot samples of cultivar Nipponbare germinated for 2 days in distilled water and then floated for 10 days on the Yoshida nutrient solution (Yoshida et al., 1976, Laboratory Manual for Physiological Studies of Rice, Ed 3. International Rice Research Institute, Manila, The Philippines) with optimal phosphorus (0.323mM NaH <sub>2</sub> PO <sub>4</sub> ) concentration but lacking iron (FeCl <sub>3</sub> ) and citric acid. Other growth conditions: growth chamber, 12h light (450μmol photons m <sup>-2</sup> s <sup>-1</sup> ) at 30°C / 12h darkness at 22°C. | Nipponbare | Japonica ( <i>Oryza sativa</i> ssp. japonica) variety resistant to infection by the plant <i>Striga hermonthica</i> , an obligate root hemiparasite (Swarbrick et al., 2008, <i>New Phytol.</i> 179: 515-529). Nipponbare is susceptible to <i>Xanthomonas oryzae</i> pv. <i>oryzae</i> strains BAI3 (from Burkina Faso), PXO99A (from the Philippines; race 6), PXO86 (from the Philippines; race 2), T7174 (from Japan; race 1), and MAI1 (from Mali). Nipponbare is well transformable with <i>Agrobacterium tumefaciens</i> : using <i>A. tumefaciens</i> strain EHA 105, transient transformation frequency has been found to be 85.2%, stable transformation frequency 53.52% (Tie et al., 2012, <i>Plant Mol. Biol.</i> 78: 1-18). Nipponbare is susceptible to <i>Meloidogyne graminicola</i> , a root knot nematode that induces re-differentiation of root cells into multinucleate giant cells and formation of hook-like galls. Nipponbare is susceptible to <i>Magnaporthe oryzae</i> isolate FR13 (virulent isolate from France) and resistant to <i>M. oryzae</i> isolates CL3.6.7 (avirulent isolate) and BR32 (nonadapted isolate from Brazil) (Abbruscato et al., 2012, <i>Mol Plant Pathol.</i> ; Faivre-Rampant et al., 2008, <i>New Phytol.</i> 180: 899-910). This variety is sensitive to drought stress; drought index 0.54 (Wei et al., 2017, <i>Front Plant Sci.</i> 8: 473). Nipponbare is susceptible to Rice Stripe Virus (RSV) (Zhao et al., 2016, <i>New Phytol.</i> 210: 196-207). | shoot |
| LOC_Os05g35160.1 |  |  |  |                                                                              |                                                                                                                                                                                                                                                                                                                                                                                                                                                                                                                                                                              |            |                                                                                                                                                                                                                                                                                                                                                                                                                                                                                                                                                                                                                                                                                                                                                                                                                                                                                                                                                                                                                                                                                                                                                                                                                                                                                                                                                                                                                                                                                                                    |       |



|  |  |          |      |      |                                                                                    |                                                                                                                                                                                                                                                                                                                                                                                                                                                                                                                                                                                                                                                                                                                                           |             |                                                                                                                                                                                                                                                                                                                                                                                                                                                                                                                                                                                                                                                                                                                                                                                                                                                                                                                                                                                                                       |          |
|--|--|----------|------|------|------------------------------------------------------------------------------------|-------------------------------------------------------------------------------------------------------------------------------------------------------------------------------------------------------------------------------------------------------------------------------------------------------------------------------------------------------------------------------------------------------------------------------------------------------------------------------------------------------------------------------------------------------------------------------------------------------------------------------------------------------------------------------------------------------------------------------------------|-------------|-----------------------------------------------------------------------------------------------------------------------------------------------------------------------------------------------------------------------------------------------------------------------------------------------------------------------------------------------------------------------------------------------------------------------------------------------------------------------------------------------------------------------------------------------------------------------------------------------------------------------------------------------------------------------------------------------------------------------------------------------------------------------------------------------------------------------------------------------------------------------------------------------------------------------------------------------------------------------------------------------------------------------|----------|
|  |  | OS-00239 | 3.21 | 9.25 | phosphorus (Dular; 1 $\mu$ M Pi; root) vs phosphorus (Dular; 320 $\mu$ M Pi; root) | Root samples of 15-day-old Dular seedlings grown in a phosphate deficient nutrient solution (1 $\mu$ M Pi); the solution (pH 5.5) was exchanged every 24h. Other growth conditions: growth chamber, 16h light (250-300 $\mu$ mol photons m <sup>-2</sup> s <sup>-1</sup> ) at 30°C / 8h darkness at 28°C cycles, 70% relative humidity. The nutrient solution as described in (Yoshida et al., 1976, Laboratory Manual for Physiological Studies of Rice, Ed 3, International Rice Research Institute, Manila, Philippines).                                                                                                                                                                                                              | Dular       | Traditional <i>Oryza sativa</i> ssp. indica variety with very low yield potential (7-22q/ha) and high tolerance to low phosphate (Pi) content in the soil. Dular is more efficient in Pi utilization and better preserves root growth under Pi-limiting conditions than a low Pi-sensitive variety, Pusa Basmati 1. When plants were grown under low Pi (1 $\mu$ M) for 15 days, Dular root length was 9.38 $\pm$ 0.17cm while Pusa Basmati 1 root length was 7.41 $\pm$ 0.15cm. Under low Pi, Dular produced more and longer lateral roots than Pusa Basmati 1. Even though under sufficient Pi root and shoot Pi content was lower in Dular than in Pusa Basmati 1, under low Pi root and shoot Pi content was higher in Dular than in Pusa Basmati 1 (Mehra et al., 2016, Front Plant Sci. 6: 1184). Dular belongs to wide-compatibility variety (WCV) rice germplasms, i.e. Dular is able to produce fertile hybrids when crossed to indica or japonica varieties (Wang et al., 1998, Theor Appl Genet. 97: 407). | roots    |
|  |  |          | 2.57 | 5.89 | phosphorus (low Pi for 24h) vs untreated seedling samples (sufficient Pi)          | Seedling samples of cultivar Zhonghua 10 grown for 7 days in a nutrient solution with sufficient phosphate (0.323mM NaH <sub>2</sub> PO <sub>4</sub> ), then transferred to low phosphate (0.016 mM NaH <sub>2</sub> PO <sub>4</sub> ) for 24h. Other components of the nutrient solution (pH 5.5): 1.425mM NH <sub>4</sub> NO <sub>3</sub> , 0.513mM K <sub>2</sub> SO <sub>4</sub> , 0.998mM CaCl <sub>2</sub> , 1.643mM MgSO <sub>4</sub> , 0.168mM Na <sub>2</sub> SiO <sub>3</sub> , 0.125mM Fe-EDTA, 0.019mM H <sub>3</sub> BO <sub>3</sub> , 0.009mM MnCl <sub>2</sub> , 0.155mM CuSO <sub>4</sub> , 0.152mM ZnSO <sub>4</sub> , 0.075mM Na <sub>2</sub> MoO <sub>4</sub> . Other conditions: 16h light at 30°C / 8h dark at 22°C. | Zhonghua 10 | Japonica ( <i>Oryza sativa</i> ssp. japonica) cultivar.                                                                                                                                                                                                                                                                                                                                                                                                                                                                                                                                                                                                                                                                                                                                                                                                                                                                                                                                                               | seedling |

qRPPUE7.13

LOC\_Os07g34110.1

|          |      |      |                                                                                       |                                                                                                                                                                                                                                                                                                                                                                                                                                                                                                                                                                                                                                                                                                                                           |                |                                                                                                                                                                                                                                                                                                                                                                                                                                                                                   |          |
|----------|------|------|---------------------------------------------------------------------------------------|-------------------------------------------------------------------------------------------------------------------------------------------------------------------------------------------------------------------------------------------------------------------------------------------------------------------------------------------------------------------------------------------------------------------------------------------------------------------------------------------------------------------------------------------------------------------------------------------------------------------------------------------------------------------------------------------------------------------------------------------|----------------|-----------------------------------------------------------------------------------------------------------------------------------------------------------------------------------------------------------------------------------------------------------------------------------------------------------------------------------------------------------------------------------------------------------------------------------------------------------------------------------|----------|
| OS-00091 | 1.53 | 2.88 | phosphorus (low Pi for 72h) vs untreated seedling samples (sufficient Pi)             | Seedling samples of cultivar Zhonghua 10 grown for 7 days in a nutrient solution with sufficient phosphate (0.323mM NaH <sub>2</sub> PO <sub>4</sub> ), then transferred to low phosphate (0.016 mM NaH <sub>2</sub> PO <sub>4</sub> ) for 72h. Other components of the nutrient solution (pH 5.5): 1.425mM NH <sub>4</sub> NO <sub>3</sub> , 0.513mM K <sub>2</sub> SO <sub>4</sub> , 0.998mM CaCl <sub>2</sub> , 1.643mM MgSO <sub>4</sub> , 0.168mM Na <sub>2</sub> SiO <sub>3</sub> , 0.125mM Fe-EDTA, 0.019mM H <sub>3</sub> BO <sub>3</sub> , 0.009mM MnCl <sub>2</sub> , 0.155mM CuSO <sub>4</sub> , 0.152mM ZnSO <sub>4</sub> , 0.075mM Na <sub>2</sub> MoO <sub>4</sub> . Other conditions: 16h light at 30°C / 8h dark at 22°C. | Zhonghua 10    | Japonica ( <i>Oryza sativa</i> ssp. japonica) cultivar.                                                                                                                                                                                                                                                                                                                                                                                                                           | seedling |
| OS-00239 | 1.78 | 3.43 | phosphorus (Pusa Basmati 1; 1μM Pi; root) phosphorus (Pusa Basmati 1; 320μM Pi; root) | Root samples of 15-day-old Pusa Basmati 1 seedlings grown in a phosphate deficient nutrient solution (1μM Pi); the solution (pH 5.5) was exchanged every 24h. Other growth conditions: growth chamber, 16h light (250-300μmol photons m <sup>-2</sup> s <sup>-1</sup> ) at 30°C / 8h darkness at 28°C cycles, 70% relative humidity. The nutrient solution as described in (Yoshida et al., 1976, Laboratory Manual for Physiological Studies of Rice, Ed 3, International Rice Research Institute, Manila, Philippines).                                                                                                                                                                                                                 | Pusa Basmati 1 | Semi-dwarf aromatic (Evolved Basmati) cultivar developed by The Indian Agricultural Research Institute (IARI), released in 1989. Low number of seeds (approx. 181) per panicle (Deshmukh et al., 2010, Funct Integr Genomics 10: 339-47). Pusa Basmati 1 is susceptible to Magnaporthe oryzae strain Mo-nwi-53 (Jain et al., 2017, Front Plant Sci. 8: 93). Pusa Basmati 1 is sensitive to low phosphate (Pi) content in the soil (Mehra et al., 2016, Front Plant Sci. 6: 1184). | roots    |

|  |                  |       |       |                                                                                               |                                                                                                                                                                                                                                                              |                  |                                                                                                                                                                                                                                                                                                                                                                                                                                                                                                                                                                                                                                                                                                                                                                                                                                                                                                                                                      |       |
|--|------------------|-------|-------|-----------------------------------------------------------------------------------------------|--------------------------------------------------------------------------------------------------------------------------------------------------------------------------------------------------------------------------------------------------------------|------------------|------------------------------------------------------------------------------------------------------------------------------------------------------------------------------------------------------------------------------------------------------------------------------------------------------------------------------------------------------------------------------------------------------------------------------------------------------------------------------------------------------------------------------------------------------------------------------------------------------------------------------------------------------------------------------------------------------------------------------------------------------------------------------------------------------------------------------------------------------------------------------------------------------------------------------------------------------|-------|
|  |                  |       |       |                                                                                               |                                                                                                                                                                                                                                                              |                  |                                                                                                                                                                                                                                                                                                                                                                                                                                                                                                                                                                                                                                                                                                                                                                                                                                                                                                                                                      |       |
|  | OS-00096         | -1.34 | -2.53 | phosphorus (IR64-null; no P fertilizer) vs phosphorus (IR64-null; 60kg/ha P2O5)               | Root samples of IR64-null line grown till the heading stage on phosphorus-deficient soil from Siniloan, Luzon, the Philippines (P-Bray, $1.23 \pm 0.30$ mgkg <sup>-1</sup> ; P-Olsen, $0.77 \pm 0.46$ mgkg <sup>-1</sup> ) under dry-down conditions.        | R64-null         | Non-transgenic, phosphorus-starvation-intolerant line from the segregating progeny of a transformant heterozygous for the 35S::PSTOL1 transgene; sibling of the transgenic 35S::PSTOL1 (20) line.                                                                                                                                                                                                                                                                                                                                                                                                                                                                                                                                                                                                                                                                                                                                                    | roots |
|  |                  | -1.46 | -2.72 | phosphorus (35S::PSTOL1 (20); no P fertilizer) vs phosphorus (35S::PSTOL1 (20); 60kg/ha P2O5) | Root samples of 35S::PSTOL1 (20) line grown till the heading stage on phosphorus-deficient soil from Siniloan, Luzon, the Philippines (P-Bray, $1.23 \pm 0.30$ mgkg <sup>-1</sup> ; P-Olsen, $0.77 \pm 0.46$ mgkg <sup>-1</sup> ) under dry-down conditions. | 35S::PSTOL1 (20) | Phosphorus-starvation-tolerant transgenic line 20 (cv. IR64 background) carrying full-length coding region (CDS) of PSTOL1 under control of the constitutive CaMV35S promoter and NOS terminator. The PSTOL1 CDS is derived from <i>O. sativa indica</i> cultivar Kasalath. PSTOL1 (Phosphorus-starvation tolerance 1; OsPupK46-2) encodes a functional serine/threonine protein kinase and is absent in genomes of phosphorus-starvation-intolerant rice varieties such as IR64, Nipponbare. 35S::PSTOL1 (20) plants grown on phosphorus-unfertilized soil have larger root system and produce approx. 60% more seeds than the control IR64-null plants (segregants without the transgene). Compared to the non-transgenic IR64-null control, total root length and surface area of 35S::PSTOL1 (20) plants is increased not only under low-phosphorus but also under phosphorus-sufficient conditions (Gamuyao et al., 2012, Nature 488: 535-539). | roots |
|  | LOC_Os07g34130.1 |       |       |                                                                                               |                                                                                                                                                                                                                                                              |                  |                                                                                                                                                                                                                                                                                                                                                                                                                                                                                                                                                                                                                                                                                                                                                                                                                                                                                                                                                      |       |
|  | LOC_Os07g34140.1 |       |       |                                                                                               |                                                                                                                                                                                                                                                              |                  |                                                                                                                                                                                                                                                                                                                                                                                                                                                                                                                                                                                                                                                                                                                                                                                                                                                                                                                                                      |       |

|  |  |          |      |      |                                                                                               |                                                                                                                                                                                                                                                              |                  |                                                                                                                                                                                                                                                                                                                                                                                                                                                                                                                                                                                                                                                                                                                                                                                                                                                                                                                                                      |       |
|--|--|----------|------|------|-----------------------------------------------------------------------------------------------|--------------------------------------------------------------------------------------------------------------------------------------------------------------------------------------------------------------------------------------------------------------|------------------|------------------------------------------------------------------------------------------------------------------------------------------------------------------------------------------------------------------------------------------------------------------------------------------------------------------------------------------------------------------------------------------------------------------------------------------------------------------------------------------------------------------------------------------------------------------------------------------------------------------------------------------------------------------------------------------------------------------------------------------------------------------------------------------------------------------------------------------------------------------------------------------------------------------------------------------------------|-------|
|  |  | OS-00096 | 3.3  | 9.96 | phosphorus (35S::PSTOL1 (20); no P fertilizer) vs phosphorus (35S::PSTOL1 (20); 60kg/ha P2O5) | Root samples of 35S::PSTOL1 (20) line grown till the heading stage on phosphorus-deficient soil from Siniloan, Luzon, the Philippines (P-Bray, $1.23 \pm 0.30$ mgkg <sup>-1</sup> ; P-Olsen, $0.77 \pm 0.46$ mgkg <sup>-1</sup> ) under dry-down conditions. | 35S::PSTOL1 (20) | Phosphorus-starvation-tolerant transgenic line 20 (cv. IR64 background) carrying full-length coding region (CDS) of PSTOL1 under control of the constitutive CaMV35S promoter and NOS terminator. The PSTOL1 CDS is derived from <i>O. sativa indica</i> cultivar Kasalath. PSTOL1 (Phosphorus-starvation tolerance 1; OsPupK46-2) encodes a functional serine/threonine protein kinase and is absent in genomes of phosphorus-starvation-intolerant rice varieties such as IR64, Nipponbare. 35S::PSTOL1 (20) plants grown on phosphorus-unfertilized soil have larger root system and produce approx. 60% more seeds than the control IR64-null plants (segregants without the transgene). Compared to the non-transgenic IR64-null control, total root length and surface area of 35S::PSTOL1 (20) plants is increased not only under low-phosphorus but also under phosphorus-sufficient conditions (Gamuyao et al., 2012, Nature 488: 535-539). | roots |
|  |  |          | 2.77 | 7.04 | phosphorus (IR64-null; no P fertilizer) vs phosphorus (IR64-null; 60kg/ha P2O5)               | Root samples of IR64-null line grown till the heading stage on phosphorus-deficient soil from Siniloan, Luzon, the Philippines (P-Bray, $1.23 \pm 0.30$ mgkg <sup>-1</sup> ; P-Olsen, $0.77 \pm 0.46$ mgkg <sup>-1</sup> ) under dry-down conditions.        | IR64-null        | Non-transgenic, phosphorus-starvation-intolerant line from the segregating progeny of a transformant heterozygous for the 35S::PSTOL1 transgene; sibling of the transgenic 35S::PSTOL1 (20) line.                                                                                                                                                                                                                                                                                                                                                                                                                                                                                                                                                                                                                                                                                                                                                    | roots |

|          |      |      |                                                                    |                                                                                                                                                                                                                                                                                                                                                                                                                                                      |          |                                                                                                                                                                                                                                                                                                                                                                                                                                                                                                                                                                                                                                                                                                                                                                                                                                                                                                                                                                                                                                                                                                                                                                                                                                                   |       |
|----------|------|------|--------------------------------------------------------------------|------------------------------------------------------------------------------------------------------------------------------------------------------------------------------------------------------------------------------------------------------------------------------------------------------------------------------------------------------------------------------------------------------------------------------------------------------|----------|---------------------------------------------------------------------------------------------------------------------------------------------------------------------------------------------------------------------------------------------------------------------------------------------------------------------------------------------------------------------------------------------------------------------------------------------------------------------------------------------------------------------------------------------------------------------------------------------------------------------------------------------------------------------------------------------------------------------------------------------------------------------------------------------------------------------------------------------------------------------------------------------------------------------------------------------------------------------------------------------------------------------------------------------------------------------------------------------------------------------------------------------------------------------------------------------------------------------------------------------------|-------|
| OS-00282 | 1.71 | 3.31 | phosphorus (phr1/2/3; -Pi for 7d) vs phosphorus (phr3; -Pi for 7d) | Shoot samples of phr1/2/3 plants grown hydroponically for 14 days in a nutrient solution (pH 5.5; Zhou et al., 2008, Plant Physiol. 146: 1673-1686) containing 200µM NaH <sub>2</sub> PO <sub>4</sub> (sufficient phosphate) and then transferred for 7 days into a solution lacking phosphate. Other conditions: greenhouse, 12h light (200µmol photons m <sup>-2</sup> s <sup>-1</sup> ) at 30°C / 12h dark at 22°C cycles, 60% relative humidity. | phr1/2/3 | Triple mutant (Nipponbare genetic background) with following mutations in OsPHR1, OsPHR2, OsPHR3 (PHOSPHATE STARVATION RESPONSE1, 2, 3): phr1, a 2bp deletion in the first translated exon of OsPHR1 (LOC_Os03g21240) resulting in a frameshift and a premature translation stop codon; phr2, a T-DNA insertion in OsPHR2 (LOC_Os07g25710); phr3, a Tos-17 retrotransposon insertion in the seventh translated exon of OsPHR3 (LOC_Os02g04640). The triple mutant was obtained by crossing single homozygous phr1, phr2 and phr3 mutants. OsPHR1, OsPHR2 and OsPHR3 are functionally redundant transcription factors involved in phosphate (Pi) signaling. Irrespective of Pi supply (low or sufficient), Pi concentration in phr1/2/3 shoots was lower than in shoots of Nipponbare wild type. Pi concentration in phr1/2/3 roots was only slightly lower than Pi concentration in wild type roots. Root and shoot biomass of phr1/2/3 was reduced compared to the wild type under both low Pi and sufficient Pi. Under Pi deficient conditions, root hairs of phr1/2/3 were much shorter than root hairs of the wild type (root hair length: phr1/2/3, approx. 40µm; wild type, approx. 175µm) (Guo et al., 2015, Plant Physiol. 168: 1762-76). | shoot |
|          | 1.61 | 3.07 | phosphorus (phr1/2/3; -Pi for 7d) vs phosphorus (phr1; -Pi for 7d) | Shoot samples of phr1/2/3 plants grown hydroponically for 14 days in a nutrient solution (pH 5.5; Zhou et al., 2008, Plant Physiol. 146: 1673-1686) containing 200µM NaH <sub>2</sub> PO <sub>4</sub> (sufficient phosphate) and then transferred for 7 days into a solution lacking phosphate. Other conditions: greenhouse, 12h light (200µmol photons m <sup>-2</sup> s <sup>-1</sup> ) at 30°C / 12h dark at 22°C cycles, 60% relative humidity. | phr1/2/3 | Triple mutant (Nipponbare genetic background) with following mutations in OsPHR1, OsPHR2, OsPHR3 (PHOSPHATE STARVATION RESPONSE1, 2, 3): phr1, a 2bp deletion in the first translated exon of OsPHR1 (LOC_Os03g21240) resulting in a frameshift and a premature translation stop codon; phr2, a T-DNA insertion in OsPHR2 (LOC_Os07g25710); phr3, a Tos-17 retrotransposon insertion in the seventh translated exon of OsPHR3 (LOC_Os02g04640). The triple mutant was obtained by crossing single homozygous phr1, phr2 and phr3 mutants. OsPHR1, OsPHR2 and OsPHR3 are functionally redundant transcription factors involved in phosphate (Pi) signaling. Irrespective of Pi supply (low or sufficient), Pi concentration in phr1/2/3 shoots was lower than in shoots of Nipponbare wild type. Pi concentration in phr1/2/3 roots was only slightly lower than Pi concentration in wild type roots. Root and shoot biomass of phr1/2/3 was reduced compared to the wild type under both low Pi and sufficient Pi. Under Pi deficient conditions, root hairs of phr1/2/3 were much shorter than root hairs of the wild type (root hair length: phr1/2/3, approx. 40µm; wild type, approx. 175µm) (Guo et al., 2015, Plant Physiol. 168: 1762-76). | shoot |

LOC\_Os07g42910.1

|      |      |                                                                           |                                                                                                                                                                                                                                                                                                                                                                                                                                                      |          |                                                                                                                                                                                                                                                                                                                                                                                                                                                                                                                                                                                                                                                                                                                                                                                                                                                                                                                                                                                                                                                                                                                                                                                                                                                   |       |
|------|------|---------------------------------------------------------------------------|------------------------------------------------------------------------------------------------------------------------------------------------------------------------------------------------------------------------------------------------------------------------------------------------------------------------------------------------------------------------------------------------------------------------------------------------------|----------|---------------------------------------------------------------------------------------------------------------------------------------------------------------------------------------------------------------------------------------------------------------------------------------------------------------------------------------------------------------------------------------------------------------------------------------------------------------------------------------------------------------------------------------------------------------------------------------------------------------------------------------------------------------------------------------------------------------------------------------------------------------------------------------------------------------------------------------------------------------------------------------------------------------------------------------------------------------------------------------------------------------------------------------------------------------------------------------------------------------------------------------------------------------------------------------------------------------------------------------------------|-------|
| 1.56 | 2.98 | phosphorus (phr1/2/3; -Pi for 7d) vs phosphorus (Nipponbare ; -Pi for 7d) | Shoot samples of phr1/2/3 plants grown hydroponically for 14 days in a nutrient solution (pH 5.5; Zhou et al., 2008, Plant Physiol. 146: 1673-1686) containing 200µM NaH <sub>2</sub> PO <sub>4</sub> (sufficient phosphate) and then transferred for 7 days into a solution lacking phosphate. Other conditions: greenhouse, 12h light (200µmol photons m <sup>-2</sup> s <sup>-1</sup> ) at 30°C / 12h dark at 22°C cycles, 60% relative humidity. | phr1/2/3 | Triple mutant (Nipponbare genetic background) with following mutations in OsPHR1, OsPHR2, OsPHR3 (PHOSPHATE STARVATION RESPONSE1, 2, 3): phr1, a 2bp deletion in the first translated exon of OsPHR1 (LOC_Os03g21240) resulting in a frameshift and a premature translation stop codon; phr2, a T-DNA insertion in OsPHR2 (LOC_Os07g25710); phr3, a Tos-17 retrotransposon insertion in the seventh translated exon of OsPHR3 (LOC_Os02g04640). The triple mutant was obtained by crossing single homozygous phr1, phr2 and phr3 mutants. OsPHR1, OsPHR2 and OsPHR3 are functionally redundant transcription factors involved in phosphate (Pi) signaling. Irrespective of Pi supply (low or sufficient), Pi concentration in phr1/2/3 shoots was lower than in shoots of Nipponbare wild type. Pi concentration in phr1/2/3 roots was only slightly lower than Pi concentration in wild type roots. Root and shoot biomass of phr1/2/3 was reduced compared to the wild type under both low Pi and sufficient Pi. Under Pi deficient conditions, root hairs of phr1/2/3 were much shorter than root hairs of the wild type (root hair length: phr1/2/3, approx. 40µm; wild type, approx. 175µm) (Guo et al., 2015, Plant Physiol. 168: 1762-76). | shoot |
|------|------|---------------------------------------------------------------------------|------------------------------------------------------------------------------------------------------------------------------------------------------------------------------------------------------------------------------------------------------------------------------------------------------------------------------------------------------------------------------------------------------------------------------------------------------|----------|---------------------------------------------------------------------------------------------------------------------------------------------------------------------------------------------------------------------------------------------------------------------------------------------------------------------------------------------------------------------------------------------------------------------------------------------------------------------------------------------------------------------------------------------------------------------------------------------------------------------------------------------------------------------------------------------------------------------------------------------------------------------------------------------------------------------------------------------------------------------------------------------------------------------------------------------------------------------------------------------------------------------------------------------------------------------------------------------------------------------------------------------------------------------------------------------------------------------------------------------------|-------|

|          |       |       |                                                                                                                         |                                                                                                                                                                                                                                                                                                                                                                                                                                                                                                                          |            |                                                                                                                                                                                                                                                                                                                                                                                                                                                                                                                                                                                                                                                                                                                                                                                                                                                                                                                                                                                                                                                                                                                                                                                                                                                                                                                                                                                                                                                                         |       |
|----------|-------|-------|-------------------------------------------------------------------------------------------------------------------------|--------------------------------------------------------------------------------------------------------------------------------------------------------------------------------------------------------------------------------------------------------------------------------------------------------------------------------------------------------------------------------------------------------------------------------------------------------------------------------------------------------------------------|------------|-------------------------------------------------------------------------------------------------------------------------------------------------------------------------------------------------------------------------------------------------------------------------------------------------------------------------------------------------------------------------------------------------------------------------------------------------------------------------------------------------------------------------------------------------------------------------------------------------------------------------------------------------------------------------------------------------------------------------------------------------------------------------------------------------------------------------------------------------------------------------------------------------------------------------------------------------------------------------------------------------------------------------------------------------------------------------------------------------------------------------------------------------------------------------------------------------------------------------------------------------------------------------------------------------------------------------------------------------------------------------------------------------------------------------------------------------------------------------|-------|
| OS-00036 | -1.28 | -2.39 | iron;<br>phosphorus<br>(no Fe and P<br>for 10d;<br>root) vs<br>untreated<br>root<br>samples<br>(sufficient<br>Fe and P) | Root samples of cultivar Nipponbare germinated for 2 days in distilled water and then floated for 10 days on the Yoshida nutrient solution (Yoshida et al., 1976, Laboratory Manual for Physiological Studies of Rice, Ed 3. International Rice Research Institute, Manila, The Philippines) lacking iron (FeCl <sub>3</sub> ) and phosphorus (NaH <sub>2</sub> PO <sub>4</sub> ). Other growth conditions: growth chamber, 12h light (450μmol photons m <sup>-2</sup> s <sup>-1</sup> ) at 30°C / 12h darkness at 22°C. | Nipponbare | Japonica ( <i>Oryza sativa</i> ssp. japonica) variety resistant to infection by the plant <i>Striga hermonthica</i> , an obligate root hemiparasite (Swarbrick et al., 2008, New Phytol. 179: 515-529). Nipponbare is susceptible to <i>Xanthomonas oryzae</i> pv. <i>oryzae</i> strains BAI3 (from Burkina Faso), PXO99A (from the Philippines; race 6), PXO86 (from the Philippines; race 2), T7174 (from Japan; race 1), and MAI1 (from Mali). Nipponbare is well transformable with <i>Agrobacterium tumefaciens</i> : using <i>A. tumefaciens</i> strain EHA 105, transient transformation frequency has been found to be 85.2%, stable transformation frequency 53.52% (Tie et al., 2012, Plant Mol. Biol. 78: 1-18). Nipponbare is susceptible to <i>Meloidogyne graminicola</i> , a root knot nematode that induces re-differentiation of root cells into multinucleate giant cells and formation of hook-like galls. Nipponbare is susceptible to <i>Magnaporthe oryzae</i> isolate FR13 (virulent isolate from France) and resistant to <i>M. oryzae</i> isolates CL3.6.7 (avirulent isolate) and BR32 (nonadapted isolate from Brazil) (Abbruscato et al., 2012, Mol Plant Pathol.; Faivre-Rampant et al., 2008, New Phytol. 180: 899-910). This variety is sensitive to drought stress; drought index 0.54 (Wei et al., 2017, Front Plant Sci. 8: 473). Nipponbare is susceptible to Rice Stripe Virus (RSV) (Zhao et al., 2016, New Phytol. 210: 196-207). | shoot |
|----------|-------|-------|-------------------------------------------------------------------------------------------------------------------------|--------------------------------------------------------------------------------------------------------------------------------------------------------------------------------------------------------------------------------------------------------------------------------------------------------------------------------------------------------------------------------------------------------------------------------------------------------------------------------------------------------------------------|------------|-------------------------------------------------------------------------------------------------------------------------------------------------------------------------------------------------------------------------------------------------------------------------------------------------------------------------------------------------------------------------------------------------------------------------------------------------------------------------------------------------------------------------------------------------------------------------------------------------------------------------------------------------------------------------------------------------------------------------------------------------------------------------------------------------------------------------------------------------------------------------------------------------------------------------------------------------------------------------------------------------------------------------------------------------------------------------------------------------------------------------------------------------------------------------------------------------------------------------------------------------------------------------------------------------------------------------------------------------------------------------------------------------------------------------------------------------------------------------|-------|

|          |       |       |                                                                                     |                                                                                                                                                                                                                                                                                                                                                                                                                                                                                                                      |       |                                                                                                                                                                                                                                                                                                                                                                                                                                                                                                                                                                                                                                                                                                                                                                                                                                                                                                                                                                                                        |       |
|----------|-------|-------|-------------------------------------------------------------------------------------|----------------------------------------------------------------------------------------------------------------------------------------------------------------------------------------------------------------------------------------------------------------------------------------------------------------------------------------------------------------------------------------------------------------------------------------------------------------------------------------------------------------------|-------|--------------------------------------------------------------------------------------------------------------------------------------------------------------------------------------------------------------------------------------------------------------------------------------------------------------------------------------------------------------------------------------------------------------------------------------------------------------------------------------------------------------------------------------------------------------------------------------------------------------------------------------------------------------------------------------------------------------------------------------------------------------------------------------------------------------------------------------------------------------------------------------------------------------------------------------------------------------------------------------------------------|-------|
| OS-00239 | -1.46 | -2.73 | phosphorus (Dular; 1μM Pi; shoot) vs phosphorus (Pusa Basmati 1; 1μM Pi; shoot)     | Shoot samples of 15-day-old Dular seedlings grown in a phosphate deficient nutrient solution (1μM Pi); the solution (pH 5.5) was exchanged every 24h. Other growth conditions: growth chamber, 16h light (250-300μmol photons m <sup>-2</sup> s <sup>-1</sup> ) at 30°C / 8h darkness at 28°C cycles, 70% relative humidity. The nutrient solution as described in (Yoshida et al., 1976, Laboratory Manual for Physiological Studies of Rice, Ed 3, International Rice Research Institute, Manila, Philippines).    | Dular | Traditional <i>Oryza sativa</i> ssp. indica variety with very low yield potential (7-22q/ha) and high tolerance to low phosphate (Pi) content in the soil. Dular is more efficient in Pi utilization and better preserves root growth under Pi-limiting conditions than a low Pi-sensitive variety, Pusa Basmati 1. When plants were grown under low Pi (1μM) for 15 days, Dular root length was 9.38 ± 0.17cm while Pusa Basmati 1 root length was 7.41 ± 0.15cm. Under low Pi, Dular produced more and longer lateral roots than Pusa Basmati 1. Even though under sufficient Pi root and shoot Pi content was lower in Dular than in Pusa Basmati 1, under low Pi root and shoot Pi content was higher in Dular than in Pusa Basmati 1 (Mehra et al., 2016, Front Plant Sci. 6: 1184). Dular belongs to wide-compatibility variety (WCV) rice germplasm, i.e. Dular is able to produce fertile hybrids when crossed to indica or japonica varieties (Wang et al., 1998, Theor Appl Genet. 97: 407). | shoot |
|          |       |       | phosphorus (Dular; 320μM Pi; shoot) vs phosphorus (Pusa Basmati 1; 320μM Pi; shoot) | Shoot samples of 15-day-old Dular seedlings grown in a phosphate sufficient nutrient solution (320μM Pi); the solution (pH 5.5) was exchanged every 24h. Other growth conditions: growth chamber, 16h light (250-300μmol photons m <sup>-2</sup> s <sup>-1</sup> ) at 30°C / 8h darkness at 28°C cycles, 70% relative humidity. The nutrient solution as described in (Yoshida et al., 1976, Laboratory Manual for Physiological Studies of Rice, Ed 3, International Rice Research Institute, Manila, Philippines). | Dular | Traditional <i>Oryza sativa</i> ssp. indica variety with very low yield potential (7-22q/ha) and high tolerance to low phosphate (Pi) content in the soil. Dular is more efficient in Pi utilization and better preserves root growth under Pi-limiting conditions than a low Pi-sensitive variety, Pusa Basmati 1. When plants were grown under low Pi (1μM) for 15 days, Dular root length was 9.38 ± 0.17cm while Pusa Basmati 1 root length was 7.41 ± 0.15cm. Under low Pi, Dular produced more and longer lateral roots than Pusa Basmati 1. Even though under sufficient Pi root and shoot Pi content was lower in Dular than in Pusa Basmati 1, under low Pi root and shoot Pi content was higher in Dular than in Pusa Basmati 1 (Mehra et al., 2016, Front Plant Sci. 6: 1184). Dular belongs to wide-compatibility variety (WCV) rice germplasm, i.e. Dular is able to produce fertile hybrids when crossed to indica or japonica varieties (Wang et al., 1998, Theor Appl Genet. 97: 407). | shoot |



|  |          |       |       |                                                                                   |                                                                                                                                                                                                                                                                                                                                                                                                                                                                                                                     |          |                                                                                                                                                                                                                                                                                                                                                                                                                                                                                                                                                                                                                                                                                                                                                                                                                                                                                                                                                                                                                                                                                                                                                                                                                                                   |       |
|--|----------|-------|-------|-----------------------------------------------------------------------------------|---------------------------------------------------------------------------------------------------------------------------------------------------------------------------------------------------------------------------------------------------------------------------------------------------------------------------------------------------------------------------------------------------------------------------------------------------------------------------------------------------------------------|----------|---------------------------------------------------------------------------------------------------------------------------------------------------------------------------------------------------------------------------------------------------------------------------------------------------------------------------------------------------------------------------------------------------------------------------------------------------------------------------------------------------------------------------------------------------------------------------------------------------------------------------------------------------------------------------------------------------------------------------------------------------------------------------------------------------------------------------------------------------------------------------------------------------------------------------------------------------------------------------------------------------------------------------------------------------------------------------------------------------------------------------------------------------------------------------------------------------------------------------------------------------|-------|
|  | OS-00239 | -1.15 | -2.26 | phosphorus (Dular; 320μM Pi; root) vs phosphorus (Pusa Basmati 1; 320μM Pi; root) | Root samples of 15-day-old Dular seedlings grown in a phosphate sufficient nutrient solution (320μM Pi); the solution (pH 5.5) was exchanged every 24h. Other growth conditions: growth chamber, 16h light (250-300μmol photons m <sup>-2</sup> s <sup>-1</sup> ) at 30°C / 8h darkness at 28°C cycles, 70% relative humidity. The nutrient solution as described in (Yoshida et al., 1976, Laboratory Manual for Physiological Studies of Rice, Ed 3, International Rice Research Institute, Manila, Philippines). | Dular    | Traditional <i>Oryza sativa</i> ssp. indica variety with very low yield potential (7-22q/ha) and high tolerance to low phosphate (Pi) content in the soil. Dular is more efficient in Pi utilization and better preserves root growth under Pi-limiting conditions than a low Pi-sensitive variety, Pusa Basmati 1. When plants were grown under low Pi (1μM) for 15 days, Dular root length was 9.38 ± 0.17cm while Pusa Basmati 1 root length was 7.41 ± 0.15cm. Under low Pi, Dular produced more and longer lateral roots than Pusa Basmati 1. Even though under sufficient Pi root and shoot Pi content was lower in Dular than in Pusa Basmati 1, under low Pi root and shoot Pi content was higher in Dular than in Pusa Basmati 1 (Mehra et al., 2016, Front Plant Sci. 6: 1184). Dular belongs to wide-compatibility variety (WCV) rice germplasms, i.e. Dular is able to produce fertile hybrids when crossed to indica or japonica varieties (Wang et al., 1998, Theor Appl Genet. 97: 407).                                                                                                                                                                                                                                           | shoot |
|  |          | -1.95 | -3.92 | phosphorus (phr1/2/3; -Pi for 7d) vs phosphorus (phr1; -Pi for 7d)                | Shoot samples of phr1/2/3 plants grown hydroponically for 14 days in a nutrient solution (pH 5.5; Zhou et al., 2008, Plant Physiol. 146: 1673-1686) containing 200μM NaH <sub>2</sub> PO <sub>4</sub> (sufficient phosphate) and then transferred for 7 days into a solution lacking phosphate. Other conditions: greenhouse, 12h light (200μmol photons m <sup>-2</sup> s <sup>-1</sup> ) at 30°C / 12h dark at 22°C cycles, 60% relative humidity.                                                                | phr1/2/3 | Triple mutant (Nipponbare genetic background) with following mutations in OsPHR1, OsPHR2, OsPHR3 (PHOSPHATE STARVATION RESPONSE1, 2, 3): phr1, a 2bp deletion in the first translated exon of OsPHR1 (LOC_Os03g21240) resulting in a frameshift and a premature translation stop codon; phr2, a T-DNA insertion in OsPHR2 (LOC_Os07g25710); phr3, a Tos-17 retrotransposon insertion in the seventh translated exon of OsPHR3 (LOC_Os02g04640). The triple mutant was obtained by crossing single homozygous phr1, phr2 and phr3 mutants. OsPHR1, OsPHR2 and OsPHR3 are functionally redundant transcription factors involved in phosphate (Pi) signaling. Irrespective of Pi supply (low or sufficient), Pi concentration in phr1/2/3 shoots was lower than in shoots of Nipponbare wild type. Pi concentration in phr1/2/3 roots was only slightly lower than Pi concentration in wild type roots. Root and shoot biomass of phr1/2/3 was reduced compared to the wild type under both low Pi and sufficient Pi. Under Pi deficient conditions, root hairs of phr1/2/3 were much shorter than root hairs of the wild type (root hair length: phr1/2/3, approx. 40μm; wild type, approx. 175μm) (Guo et al., 2015, Plant Physiol. 168: 1762-76). | shoot |

qRPPUE7.14

LOC\_Os07g42924.1

OS-00282

-2.14

-4.38

phosphorus  
(phr1/2/3; -  
Pi for 7d) vs  
phosphorus  
(phr3; -Pi  
for 7d)

Shoot samples of phr1/2/3 plants grown hydroponically for 14 days in a nutrient solution (pH 5.5; Zhou et al., 2008, Plant Physiol. 146: 1673-1686) containing 200 $\mu$ M NaH<sub>2</sub>PO<sub>4</sub> (sufficient phosphate) and then transferred for 7 days into a solution lacking phosphate. Other conditions: greenhouse, 12h light (200 $\mu$ mol photons m<sup>-2</sup> s<sup>-1</sup>) at 30°C / 12h dark at 22°C cycles, 60% relative humidity.

phr1/2/3

Triple mutant (Nipponbare genetic background) with following mutations in OsPHR1, OsPHR2, OsPHR3 (PHOSPHATE STARVATION RESPONSE1, 2, 3): phr1, a 2bp deletion in the first translated exon of OsPHR1 (LOC\_Os03g21240) resulting in a frameshift and a premature translation stop codon; phr2, a T-DNA insertion in OsPHR2 (LOC\_Os07g25710); phr3, a Tos-17 retrotransposon insertion in the seventh translated exon of OsPHR3 (LOC\_Os02g04640). The triple mutant was obtained by crossing single homozygous phr1, phr2 and phr3 mutants. OsPHR1, OsPHR2 and OsPHR3 are functionally redundant transcription factors involved in phosphate (Pi) signaling. Irrespective of Pi supply (low or sufficient), Pi concentration in phr1/2/3 shoots was lower than in shoots of Nipponbare wild type. Pi concentration in phr1/2/3 roots was only slightly lower than Pi concentration in wild type roots. Root and shoot biomass of phr1/2/3 was reduced compared to the wild type under both low Pi and sufficient Pi. Under Pi deficient conditions, root hairs of phr1/2/3 were much shorter than root hairs of the wild type (root hair length: phr1/2/3, approx. 40 $\mu$ m; wild type, approx. 175 $\mu$ m) (Guo et al., 2015, Plant Physiol. 168: 1762-76).

shoot

-2.32

-4.96

phosphorus  
(phr1/2/3; -  
Pi for 7d) vs  
phosphorus  
(Nipponbare  
; -Pi for 7d)

Shoot samples of phr1/2/3 plants grown hydroponically for 14 days in a nutrient solution (pH 5.5; Zhou et al., 2008, Plant Physiol. 146: 1673-1686) containing 200 $\mu$ M NaH<sub>2</sub>PO<sub>4</sub> (sufficient phosphate) and then transferred for 7 days into a solution lacking phosphate. Other conditions: greenhouse, 12h light (200 $\mu$ mol photons m<sup>-2</sup> s<sup>-1</sup>) at 30°C / 12h dark at 22°C cycles, 60% relative humidity.

phr1/2/3

Triple mutant (Nipponbare genetic background) with following mutations in OsPHR1, OsPHR2, OsPHR3 (PHOSPHATE STARVATION RESPONSE1, 2, 3): phr1, a 2bp deletion in the first translated exon of OsPHR1 (LOC\_Os03g21240) resulting in a frameshift and a premature translation stop codon; phr2, a T-DNA insertion in OsPHR2 (LOC\_Os07g25710); phr3, a Tos-17 retrotransposon insertion in the seventh translated exon of OsPHR3 (LOC\_Os02g04640). The triple mutant was obtained by crossing single homozygous phr1, phr2 and phr3 mutants. OsPHR1, OsPHR2 and OsPHR3 are functionally redundant transcription factors involved in phosphate (Pi) signaling. Irrespective of Pi supply (low or sufficient), Pi concentration in phr1/2/3 shoots was lower than in shoots of Nipponbare wild type. Pi concentration in phr1/2/3 roots was only slightly lower than Pi concentration in wild type roots. Root and shoot biomass of phr1/2/3 was reduced compared to the wild type under both low Pi and sufficient Pi. Under Pi deficient conditions, root hairs of phr1/2/3 were much shorter than root hairs of the wild type (root hair length: phr1/2/3, approx. 40 $\mu$ m; wild type, approx. 175 $\mu$ m) (Guo et al., 2015, Plant Physiol. 168: 1762-76).

shoot

|  |          |      |      |                                                                                 |                                                                                                                                                                                                                                                                                                                                                                                                                                                                                                                                                                             |            |                                                                                                                                                                                                                                                                                                                                                                                                                                                                                                                                                                                                                                                                                                                                                                                                                                                                                                                                                                                                                                                                                                                                                                                                                                                                                                                                                                                                                                                                                                                    |       |
|--|----------|------|------|---------------------------------------------------------------------------------|-----------------------------------------------------------------------------------------------------------------------------------------------------------------------------------------------------------------------------------------------------------------------------------------------------------------------------------------------------------------------------------------------------------------------------------------------------------------------------------------------------------------------------------------------------------------------------|------------|--------------------------------------------------------------------------------------------------------------------------------------------------------------------------------------------------------------------------------------------------------------------------------------------------------------------------------------------------------------------------------------------------------------------------------------------------------------------------------------------------------------------------------------------------------------------------------------------------------------------------------------------------------------------------------------------------------------------------------------------------------------------------------------------------------------------------------------------------------------------------------------------------------------------------------------------------------------------------------------------------------------------------------------------------------------------------------------------------------------------------------------------------------------------------------------------------------------------------------------------------------------------------------------------------------------------------------------------------------------------------------------------------------------------------------------------------------------------------------------------------------------------|-------|
|  | OS-00036 | 1.1  | 2.14 | iron (no Fe for 10d; root) vs untreated root samples (sufficient Fe and P)      | Root samples of cultivar Nipponbare germinated for 2 days in distilled water and then floated for 10 days on the Yoshida nutrient solution (Yoshida et al., 1976, Laboratory Manual for Physiological Studies of Rice, Ed 3. International Rice Research Institute, Manila, The Philippines) with optimal phosphorus (0.323mM NaH <sub>2</sub> PO <sub>4</sub> ) concentration but lacking iron (FeCl <sub>3</sub> ) and citric acid. Other growth conditions: growth chamber, 12h light (450μmol photons m <sup>-2</sup> s <sup>-1</sup> ) at 30°C / 12h darkness at 22°C. | Nipponbare | Japonica ( <i>Oryza sativa</i> ssp. japonica) variety resistant to infection by the plant <i>Striga hermonthica</i> , an obligate root hemiparasite (Swarbrick et al., 2008, <i>New Phytol.</i> 179: 515-529). Nipponbare is susceptible to <i>Xanthomonas oryzae</i> pv. <i>oryzae</i> strains BAI3 (from Burkina Faso), PXO99A (from the Philippines; race 6), PXO86 (from the Philippines; race 2), T7174 (from Japan; race 1), and MAI1 (from Mali). Nipponbare is well transformable with <i>Agrobacterium tumefaciens</i> : using <i>A. tumefaciens</i> strain EHA 105, transient transformation frequency has been found to be 85.2%, stable transformation frequency 53.52% (Tie et al., 2012, <i>Plant Mol. Biol.</i> 78: 1-18). Nipponbare is susceptible to <i>Meloidogyne graminicola</i> , a root knot nematode that induces re-differentiation of root cells into multinucleate giant cells and formation of hook-like galls. Nipponbare is susceptible to <i>Magnaporthe oryzae</i> isolate FR13 (virulent isolate from France) and resistant to <i>M. oryzae</i> isolates CL3.6.7 (avirulent isolate) and BR32 (nonadapted isolate from Brazil) (Abbruscato et al., 2012, <i>Mol Plant Pathol.</i> ; Faivre-Rampant et al., 2008, <i>New Phytol.</i> 180: 899-910). This variety is sensitive to drought stress; drought index 0.54 (Wei et al., 2017, <i>Front Plant Sci.</i> 8: 473). Nipponbare is susceptible to Rice Stripe Virus (RSV) (Zhao et al., 2016, <i>New Phytol.</i> 210: 196-207). | roots |
|  | OS-00096 | 1.04 | 2.08 | phosphorus (IR64-null; no P fertilizer) vs phosphorus (IR64-null; 60kg/ha P2O5) | Root samples of IR64-null line grown till the heading stage on phosphorus-deficient soil from Siniloan, Luzon, the Philippines (P-Bray, 1.23 ± 0.30mgkg <sup>-1</sup> ; P-Olsen, 0.77 ± 0.46 mgkg <sup>-1</sup> ) under dry-down conditions.                                                                                                                                                                                                                                                                                                                                | IR64-null  | Non-transgenic, phosphorus-starvation-intolerant line from the segregating progeny of a transformant heterozygous for the 35S::PSTOL1 transgene; sibling of the transgenic 35S::PSTOL1 (20) line.                                                                                                                                                                                                                                                                                                                                                                                                                                                                                                                                                                                                                                                                                                                                                                                                                                                                                                                                                                                                                                                                                                                                                                                                                                                                                                                  | roots |

|                  |          |       |       |                                                                                   |                                                                                                                                                                                                                                                                                                                                                                                                                                                                                                                     |       |                                                                                                                                                                                                                                                                                                                                                                                                                                                                                                                                                                                                                                                                                                                                                                                                                                                                                                                                                                                                 |       |
|------------------|----------|-------|-------|-----------------------------------------------------------------------------------|---------------------------------------------------------------------------------------------------------------------------------------------------------------------------------------------------------------------------------------------------------------------------------------------------------------------------------------------------------------------------------------------------------------------------------------------------------------------------------------------------------------------|-------|-------------------------------------------------------------------------------------------------------------------------------------------------------------------------------------------------------------------------------------------------------------------------------------------------------------------------------------------------------------------------------------------------------------------------------------------------------------------------------------------------------------------------------------------------------------------------------------------------------------------------------------------------------------------------------------------------------------------------------------------------------------------------------------------------------------------------------------------------------------------------------------------------------------------------------------------------------------------------------------------------|-------|
| LOC_Os07g42940.1 | OS-00239 | -1.18 | -2.27 | phosphorus (Dular; 320μM Pi; root) vs phosphorus (Pusa Basmati 1; 320μM Pi; root) | Root samples of 15-day-old Dular seedlings grown in a phosphate sufficient nutrient solution (320μM Pi); the solution (pH 5.5) was exchanged every 24h. Other growth conditions: growth chamber, 16h light (250-300μmol photons m <sup>-2</sup> s <sup>-1</sup> ) at 30°C / 8h darkness at 28°C cycles, 70% relative humidity. The nutrient solution as described in (Yoshida et al., 1976, Laboratory Manual for Physiological Studies of Rice, Ed 3, International Rice Research Institute, Manila, Philippines). | Dular | Traditional Oryza sativa ssp. indica variety with very low yield potential (7-22q/ha) and high tolerance to low phosphate (Pi) content in the soil. Dular is more efficient in Pi utilization and better preserves root growth under Pi-limiting conditions than a low Pi-sensitive variety, Pusa Basmati 1. When plants were grown under low Pi (1μM) for 15 days, Dular root length was 9.38 ± 0.17cm while Pusa Basmati 1 root length was 7.41 ± 0.15cm. Under low Pi, Dular produced more and longer lateral roots than Pusa Basmati 1. Even though under sufficient Pi root and shoot Pi content was lower in Dular than in Pusa Basmati 1, under low Pi root and shoot Pi content was higher in Dular than in Pusa Basmati 1 (Mehra et al., 2016, Front Plant Sci. 6: 1184). Dular belongs to wide-compatibility variety (WCV) rice germplasm, i.e. Dular is able to produce fertile hybrids when crossed to indica or japonica varieties (Wang et al., 1998, Theor Appl Genet. 97: 407). | roots |
|                  |          | -1.2  | -2.29 | phosphorus (Dular; 1μM Pi; root) vs phosphorus (Pusa Basmati 1; 1μM Pi; root)     | Root samples of 15-day-old Dular seedlings grown in a phosphate deficient nutrient solution (1μM Pi); the solution (pH 5.5) was exchanged every 24h. Other growth conditions: growth chamber, 16h light (250-300μmol photons m <sup>-2</sup> s <sup>-1</sup> ) at 30°C / 8h darkness at 28°C cycles, 70% relative humidity. The nutrient solution as described in (Yoshida et al., 1976, Laboratory Manual for Physiological Studies of Rice, Ed 3, International Rice Research Institute, Manila, Philippines).    | Dular | Traditional Oryza sativa ssp. indica variety with very low yield potential (7-22q/ha) and high tolerance to low phosphate (Pi) content in the soil. Dular is more efficient in Pi utilization and better preserves root growth under Pi-limiting conditions than a low Pi-sensitive variety, Pusa Basmati 1. When plants were grown under low Pi (1μM) for 15 days, Dular root length was 9.38 ± 0.17cm while Pusa Basmati 1 root length was 7.41 ± 0.15cm. Under low Pi, Dular produced more and longer lateral roots than Pusa Basmati 1. Even though under sufficient Pi root and shoot Pi content was lower in Dular than in Pusa Basmati 1, under low Pi root and shoot Pi content was higher in Dular than in Pusa Basmati 1 (Mehra et al., 2016, Front Plant Sci. 6: 1184). Dular belongs to wide-compatibility variety (WCV) rice germplasm, i.e. Dular is able to produce fertile hybrids when crossed to indica or japonica varieties (Wang et al., 1998, Theor Appl Genet. 97: 407). | roots |
| LOC_Os07g42950.1 |          |       |       |                                                                                   |                                                                                                                                                                                                                                                                                                                                                                                                                                                                                                                     |       |                                                                                                                                                                                                                                                                                                                                                                                                                                                                                                                                                                                                                                                                                                                                                                                                                                                                                                                                                                                                 |       |

|  |          |      |      |                                                                        |                                                                                                                                                                                                                                                                                                                                                                                                                                                                                                                  |       |                                                                                                                                                                                                                                                                                                                                                                                                                                                                                                                                                                                                                                                                                                                                                                                                                                                                                                                                                                                                                              |       |
|--|----------|------|------|------------------------------------------------------------------------|------------------------------------------------------------------------------------------------------------------------------------------------------------------------------------------------------------------------------------------------------------------------------------------------------------------------------------------------------------------------------------------------------------------------------------------------------------------------------------------------------------------|-------|------------------------------------------------------------------------------------------------------------------------------------------------------------------------------------------------------------------------------------------------------------------------------------------------------------------------------------------------------------------------------------------------------------------------------------------------------------------------------------------------------------------------------------------------------------------------------------------------------------------------------------------------------------------------------------------------------------------------------------------------------------------------------------------------------------------------------------------------------------------------------------------------------------------------------------------------------------------------------------------------------------------------------|-------|
|  | OS-00239 | 1.85 | 3.58 | phosphorus (Dular; 1μM Pi; root) vs phosphorus (Dular; 320μM Pi; root) | Root samples of 15-day-old Dular seedlings grown in a phosphate deficient nutrient solution (1μM Pi); the solution (pH 5.5) was exchanged every 24h. Other growth conditions: growth chamber, 16h light (250-300μmol photons m <sup>-2</sup> s <sup>-1</sup> ) at 30°C / 8h darkness at 28°C cycles, 70% relative humidity. The nutrient solution as described in (Yoshida et al., 1976, Laboratory Manual for Physiological Studies of Rice, Ed 3, International Rice Research Institute, Manila, Philippines). | Dular | Traditional <i>Oryza sativa</i> ssp. <i>indica</i> variety with very low yield potential (7-22q/ha) and high tolerance to low phosphate (Pi) content in the soil. Dular is more efficient in Pi utilization and better preserves root growth under Pi-limiting conditions than a low Pi-sensitive variety, Pusa Basmati 1. When plants were grown under low Pi (1μM) for 15 days, Dular root length was 9.38 ± 0.17cm while Pusa Basmati 1 root length was 7.41 ± 0.15cm. Under low Pi, Dular produced more and longer lateral roots than Pusa Basmati 1. Even though under sufficient Pi root and shoot Pi content was lower in Dular than in Pusa Basmati 1, under low Pi root and shoot Pi content was higher in Dular than in Pusa Basmati 1 (Mehra et al., 2016, Front Plant Sci. 6: 1184). Dular belongs to wide-compatibility variety (WCV) rice germplasms, i.e. Dular is able to produce fertile hybrids when crossed to <i>indica</i> or <i>japonica</i> varieties (Wang et al., 1998, Theor Appl Genet. 97: 407). | roots |
|--|----------|------|------|------------------------------------------------------------------------|------------------------------------------------------------------------------------------------------------------------------------------------------------------------------------------------------------------------------------------------------------------------------------------------------------------------------------------------------------------------------------------------------------------------------------------------------------------------------------------------------------------|-------|------------------------------------------------------------------------------------------------------------------------------------------------------------------------------------------------------------------------------------------------------------------------------------------------------------------------------------------------------------------------------------------------------------------------------------------------------------------------------------------------------------------------------------------------------------------------------------------------------------------------------------------------------------------------------------------------------------------------------------------------------------------------------------------------------------------------------------------------------------------------------------------------------------------------------------------------------------------------------------------------------------------------------|-------|

|  |  |  |                                                                            |                                                                                                                                                                                                                                                                                                                                                                                                                                                                                                                                                                             |            |                                                                                                                                                                                                                                                                                                                                                                                                                                                                                                                                                                                                                                                                                                                                                                                                                                                                                                                                                                                                                                                                                                                                                                                                                                                                                                                                                                                                                                                                                                                    |       |
|--|--|--|----------------------------------------------------------------------------|-----------------------------------------------------------------------------------------------------------------------------------------------------------------------------------------------------------------------------------------------------------------------------------------------------------------------------------------------------------------------------------------------------------------------------------------------------------------------------------------------------------------------------------------------------------------------------|------------|--------------------------------------------------------------------------------------------------------------------------------------------------------------------------------------------------------------------------------------------------------------------------------------------------------------------------------------------------------------------------------------------------------------------------------------------------------------------------------------------------------------------------------------------------------------------------------------------------------------------------------------------------------------------------------------------------------------------------------------------------------------------------------------------------------------------------------------------------------------------------------------------------------------------------------------------------------------------------------------------------------------------------------------------------------------------------------------------------------------------------------------------------------------------------------------------------------------------------------------------------------------------------------------------------------------------------------------------------------------------------------------------------------------------------------------------------------------------------------------------------------------------|-------|
|  |  |  | iron (no Fe for 10d; root) vs iron; phosphorus (no Fe and P for 10d; root) | Root samples of cultivar Nipponbare germinated for 2 days in distilled water and then floated for 10 days on the Yoshida nutrient solution (Yoshida et al., 1976, Laboratory Manual for Physiological Studies of Rice, Ed 3. International Rice Research Institute, Manila, The Philippines) with optimal phosphorus (0.323mM NaH <sub>2</sub> PO <sub>4</sub> ) concentration but lacking iron (FeCl <sub>3</sub> ) and citric acid. Other growth conditions: growth chamber, 12h light (450μmol photons m <sup>-2</sup> s <sup>-1</sup> ) at 30°C / 12h darkness at 22°C. | Nipponbare | Japonica ( <i>Oryza sativa</i> ssp. japonica) variety resistant to infection by the plant <i>Striga hermonthica</i> , an obligate root hemiparasite (Swarbrick et al., 2008, <i>New Phytol.</i> 179: 515-529). Nipponbare is susceptible to <i>Xanthomonas oryzae</i> pv. <i>oryzae</i> strains BAI3 (from Burkina Faso), PXO99A (from the Philippines; race 6), PXO86 (from the Philippines; race 2), T7174 (from Japan; race 1), and MAI1 (from Mali). Nipponbare is well transformable with <i>Agrobacterium tumefaciens</i> : using <i>A. tumefaciens</i> strain EHA 105, transient transformation frequency has been found to be 85.2%, stable transformation frequency 53.52% (Tie et al., 2012, <i>Plant Mol. Biol.</i> 78: 1-18). Nipponbare is susceptible to <i>Meloidogyne graminicola</i> , a root knot nematode that induces re-differentiation of root cells into multinucleate giant cells and formation of hook-like galls. Nipponbare is susceptible to <i>Magnaporthe oryzae</i> isolate FR13 (virulent isolate from France) and resistant to <i>M. oryzae</i> isolates CL3.6.7 (avirulent isolate) and BR32 (nonadapted isolate from Brazil) (Abbruscato et al., 2012, <i>Mol Plant Pathol.</i> ; Faivre-Rampant et al., 2008, <i>New Phytol.</i> 180: 899-910). This variety is sensitive to drought stress; drought index 0.54 (Wei et al., 2017, <i>Front Plant Sci.</i> 8: 473). Nipponbare is susceptible to Rice Stripe Virus (RSV) (Zhao et al., 2016, <i>New Phytol.</i> 210: 196-207). | roots |
|--|--|--|----------------------------------------------------------------------------|-----------------------------------------------------------------------------------------------------------------------------------------------------------------------------------------------------------------------------------------------------------------------------------------------------------------------------------------------------------------------------------------------------------------------------------------------------------------------------------------------------------------------------------------------------------------------------|------------|--------------------------------------------------------------------------------------------------------------------------------------------------------------------------------------------------------------------------------------------------------------------------------------------------------------------------------------------------------------------------------------------------------------------------------------------------------------------------------------------------------------------------------------------------------------------------------------------------------------------------------------------------------------------------------------------------------------------------------------------------------------------------------------------------------------------------------------------------------------------------------------------------------------------------------------------------------------------------------------------------------------------------------------------------------------------------------------------------------------------------------------------------------------------------------------------------------------------------------------------------------------------------------------------------------------------------------------------------------------------------------------------------------------------------------------------------------------------------------------------------------------------|-------|

LOC\_Os07g42960.1

|          |      |      |                                                                            |                                                                                                                                                                                                                                                                                                                                                                                                                                                                                                                                                                             |            |                                                                                                                                                                                                                                                                                                                                                                                                                                                                                                                                                                                                                                                                                                                                                                                                                                                                                                                                                                                                                                                                                                                                                                                                                                                                                                                                                                                                                                                                         |       |
|----------|------|------|----------------------------------------------------------------------------|-----------------------------------------------------------------------------------------------------------------------------------------------------------------------------------------------------------------------------------------------------------------------------------------------------------------------------------------------------------------------------------------------------------------------------------------------------------------------------------------------------------------------------------------------------------------------------|------------|-------------------------------------------------------------------------------------------------------------------------------------------------------------------------------------------------------------------------------------------------------------------------------------------------------------------------------------------------------------------------------------------------------------------------------------------------------------------------------------------------------------------------------------------------------------------------------------------------------------------------------------------------------------------------------------------------------------------------------------------------------------------------------------------------------------------------------------------------------------------------------------------------------------------------------------------------------------------------------------------------------------------------------------------------------------------------------------------------------------------------------------------------------------------------------------------------------------------------------------------------------------------------------------------------------------------------------------------------------------------------------------------------------------------------------------------------------------------------|-------|
| OS-00036 | 1.45 | 2.73 | iron (no Fe for 10d; root) vs untreated root samples (sufficient Fe and P) | Root samples of cultivar Nipponbare germinated for 2 days in distilled water and then floated for 10 days on the Yoshida nutrient solution (Yoshida et al., 1976, Laboratory Manual for Physiological Studies of Rice, Ed 3. International Rice Research Institute, Manila, The Philippines) with optimal phosphorus (0.323mM NaH <sub>2</sub> PO <sub>4</sub> ) concentration but lacking iron (FeCl <sub>3</sub> ) and citric acid. Other growth conditions: growth chamber, 12h light (450μmol photons m <sup>-2</sup> s <sup>-1</sup> ) at 30°C / 12h darkness at 22°C. | Nipponbare | Japonica ( <i>Oryza sativa</i> ssp. japonica) variety resistant to infection by the plant <i>Striga hermonthica</i> , an obligate root hemiparasite (Swarbrick et al., 2008, New Phytol. 179: 515-529). Nipponbare is susceptible to <i>Xanthomonas oryzae</i> pv. <i>oryzae</i> strains BAI3 (from Burkina Faso), PXO99A (from the Philippines; race 6), PXO86 (from the Philippines; race 2), T7174 (from Japan; race 1), and MAI1 (from Mali). Nipponbare is well transformable with <i>Agrobacterium tumefaciens</i> : using <i>A. tumefaciens</i> strain EHA 105, transient transformation frequency has been found to be 85.2%, stable transformation frequency 53.52% (Tie et al., 2012, Plant Mol. Biol. 78: 1-18). Nipponbare is susceptible to <i>Meloidogyne graminicola</i> , a root knot nematode that induces re-differentiation of root cells into multinucleate giant cells and formation of hook-like galls. Nipponbare is susceptible to <i>Magnaporthe oryzae</i> isolate FR13 (virulent isolate from France) and resistant to <i>M. oryzae</i> isolates CL3.6.7 (avirulent isolate) and BR32 (nonadapted isolate from Brazil) (Abbruscato et al., 2012, Mol Plant Pathol.; Faivre-Rampant et al., 2008, New Phytol. 180: 899-910). This variety is sensitive to drought stress; drought index 0.54 (Wei et al., 2017, Front Plant Sci. 8: 473). Nipponbare is susceptible to Rice Stripe Virus (RSV) (Zhao et al., 2016, New Phytol. 210: 196-207). | roots |
|----------|------|------|----------------------------------------------------------------------------|-----------------------------------------------------------------------------------------------------------------------------------------------------------------------------------------------------------------------------------------------------------------------------------------------------------------------------------------------------------------------------------------------------------------------------------------------------------------------------------------------------------------------------------------------------------------------------|------------|-------------------------------------------------------------------------------------------------------------------------------------------------------------------------------------------------------------------------------------------------------------------------------------------------------------------------------------------------------------------------------------------------------------------------------------------------------------------------------------------------------------------------------------------------------------------------------------------------------------------------------------------------------------------------------------------------------------------------------------------------------------------------------------------------------------------------------------------------------------------------------------------------------------------------------------------------------------------------------------------------------------------------------------------------------------------------------------------------------------------------------------------------------------------------------------------------------------------------------------------------------------------------------------------------------------------------------------------------------------------------------------------------------------------------------------------------------------------------|-------|

|  |     |      |                                                                              |                                                                                                                                                                                                                                                                                                                                                                                                                                                                                                                                                                              |            |                                                                                                                                                                                                                                                                                                                                                                                                                                                                                                                                                                                                                                                                                                                                                                                                                                                                                                                                                                                                                                                                                                                                                                                                                                                                                                                                                                                                                                                                                                                    |       |
|--|-----|------|------------------------------------------------------------------------------|------------------------------------------------------------------------------------------------------------------------------------------------------------------------------------------------------------------------------------------------------------------------------------------------------------------------------------------------------------------------------------------------------------------------------------------------------------------------------------------------------------------------------------------------------------------------------|------------|--------------------------------------------------------------------------------------------------------------------------------------------------------------------------------------------------------------------------------------------------------------------------------------------------------------------------------------------------------------------------------------------------------------------------------------------------------------------------------------------------------------------------------------------------------------------------------------------------------------------------------------------------------------------------------------------------------------------------------------------------------------------------------------------------------------------------------------------------------------------------------------------------------------------------------------------------------------------------------------------------------------------------------------------------------------------------------------------------------------------------------------------------------------------------------------------------------------------------------------------------------------------------------------------------------------------------------------------------------------------------------------------------------------------------------------------------------------------------------------------------------------------|-------|
|  |     |      |                                                                              |                                                                                                                                                                                                                                                                                                                                                                                                                                                                                                                                                                              |            |                                                                                                                                                                                                                                                                                                                                                                                                                                                                                                                                                                                                                                                                                                                                                                                                                                                                                                                                                                                                                                                                                                                                                                                                                                                                                                                                                                                                                                                                                                                    |       |
|  | 1.1 | 2.15 | iron (no Fe for 10d; shoot) vs untreated shoot samples (sufficient Fe and P) | Shoot samples of cultivar Nipponbare germinated for 2 days in distilled water and then floated for 10 days on the Yoshida nutrient solution (Yoshida et al., 1976, Laboratory Manual for Physiological Studies of Rice, Ed 3. International Rice Research Institute, Manila, The Philippines) with optimal phosphorus (0.323mM NaH <sub>2</sub> PO <sub>4</sub> ) concentration but lacking iron (FeCl <sub>3</sub> ) and citric acid. Other growth conditions: growth chamber, 12h light (450μmol photons m <sup>-2</sup> s <sup>-1</sup> ) at 30°C / 12h darkness at 22°C. | Nipponbare | Japonica ( <i>Oryza sativa</i> ssp. japonica) variety resistant to infection by the plant <i>Striga hermonthica</i> , an obligate root hemiparasite (Swarbrick et al., 2008, <i>New Phytol.</i> 179: 515-529). Nipponbare is susceptible to <i>Xanthomonas oryzae</i> pv. <i>oryzae</i> strains BAI3 (from Burkina Faso), PXO99A (from the Philippines; race 6), PXO86 (from the Philippines; race 2), T7174 (from Japan; race 1), and MAI1 (from Mali). Nipponbare is well transformable with <i>Agrobacterium tumefaciens</i> : using <i>A. tumefaciens</i> strain EHA 105, transient transformation frequency has been found to be 85.2%, stable transformation frequency 53.52% (Tie et al., 2012, <i>Plant Mol. Biol.</i> 78: 1-18). Nipponbare is susceptible to <i>Meloidogyne graminicola</i> , a root knot nematode that induces re-differentiation of root cells into multinucleate giant cells and formation of hook-like galls. Nipponbare is susceptible to <i>Magnaporthe oryzae</i> isolate FR13 (virulent isolate from France) and resistant to <i>M. oryzae</i> isolates CL3.6.7 (avirulent isolate) and BR32 (nonadapted isolate from Brazil) (Abbruscato et al., 2012, <i>Mol Plant Pathol.</i> ; Faivre-Rampant et al., 2008, <i>New Phytol.</i> 180: 899-910). This variety is sensitive to drought stress; drought index 0.54 (Wei et al., 2017, <i>Front Plant Sci.</i> 8: 473). Nipponbare is susceptible to Rice Stripe Virus (RSV) (Zhao et al., 2016, <i>New Phytol.</i> 210: 196-207). | shoot |



|                  |          |       |       |                                                                                   |                                                                                                                                                                                                                                                                                                                                                                                                                                                                                                                                                                                                                                                                                                                                           |             |                                                                                                                                                                                                                                                                                                                                                                                                                                                                                                                                                                                                                                                                                                                                                                                                                                                                                                                                                                                                         |          |
|------------------|----------|-------|-------|-----------------------------------------------------------------------------------|-------------------------------------------------------------------------------------------------------------------------------------------------------------------------------------------------------------------------------------------------------------------------------------------------------------------------------------------------------------------------------------------------------------------------------------------------------------------------------------------------------------------------------------------------------------------------------------------------------------------------------------------------------------------------------------------------------------------------------------------|-------------|---------------------------------------------------------------------------------------------------------------------------------------------------------------------------------------------------------------------------------------------------------------------------------------------------------------------------------------------------------------------------------------------------------------------------------------------------------------------------------------------------------------------------------------------------------------------------------------------------------------------------------------------------------------------------------------------------------------------------------------------------------------------------------------------------------------------------------------------------------------------------------------------------------------------------------------------------------------------------------------------------------|----------|
|                  | OS-00239 | -1.06 | -2.08 | phosphorus (Dular; 320μM Pi; root) vs phosphorus (Pusa Basmati 1; 320μM Pi; root) | Root samples of 15-day-old Dular seedlings grown in a phosphate sufficient nutrient solution (320μM Pi); the solution (pH 5.5) was exchanged every 24h. Other growth conditions: growth chamber, 16h light (250-300μmol photons m <sup>-2</sup> s <sup>-1</sup> ) at 30°C / 8h darkness at 28°C cycles, 70% relative humidity. The nutrient solution as described in (Yoshida et al., 1976, Laboratory Manual for Physiological Studies of Rice, Ed 3, International Rice Research Institute, Manila, Philippines).                                                                                                                                                                                                                       | Dular       | Traditional <i>Oryza sativa</i> ssp. indica variety with very low yield potential (7-22q/ha) and high tolerance to low phosphate (Pi) content in the soil. Dular is more efficient in Pi utilization and better preserves root growth under Pi-limiting conditions than a low Pi-sensitive variety, Pusa Basmati 1. When plants were grown under low Pi (1μM) for 15 days, Dular root length was 9.38 ± 0.17cm while Pusa Basmati 1 root length was 7.41 ± 0.15cm. Under low Pi, Dular produced more and longer lateral roots than Pusa Basmati 1. Even though under sufficient Pi root and shoot Pi content was lower in Dular than in Pusa Basmati 1, under low Pi root and shoot Pi content was higher in Dular than in Pusa Basmati 1 (Mehra et al., 2016, Front Plant Sci. 6: 1184). Dular belongs to wide-compatibility variety (WCV) rice germplasms, i.e. Dular is able to produce fertile hybrids when crossed to indica or japonica varieties (Wang et al., 1998, Theor Appl Genet. 97: 407). | roots    |
|                  | OS-00091 | -2.51 | -5.67 | phosphorus (low Pi for 72h) vs untreated seedling samples (sufficient Pi)         | Seedling samples of cultivar Zhonghua 10 grown for 7 days in a nutrient solution with sufficient phosphate (0.323mM NaH <sub>2</sub> PO <sub>4</sub> ), then transferred to low phosphate (0.016 mM NaH <sub>2</sub> PO <sub>4</sub> ) for 72h. Other components of the nutrient solution (pH 5.5): 1.425mM NH <sub>4</sub> NO <sub>3</sub> , 0.513mM K <sub>2</sub> SO <sub>4</sub> , 0.998mM CaCl <sub>2</sub> , 1.643mM MgSO <sub>4</sub> , 0.168mM Na <sub>2</sub> SiO <sub>3</sub> , 0.125mM Fe-EDTA, 0.019mM H <sub>3</sub> BO <sub>3</sub> , 0.009mM MnCl <sub>2</sub> , 0.155mM CuSO <sub>4</sub> , 0.152mM ZnSO <sub>4</sub> , 0.075mM Na <sub>2</sub> MoO <sub>4</sub> . Other conditions: 16h light at 30°C / 8h dark at 22°C. | Zhonghua 10 | Japonica ( <i>Oryza sativa</i> ssp. japonica) cultivar.                                                                                                                                                                                                                                                                                                                                                                                                                                                                                                                                                                                                                                                                                                                                                                                                                                                                                                                                                 | seedling |
| LOC_Os07g42970.1 |          |       |       |                                                                                   |                                                                                                                                                                                                                                                                                                                                                                                                                                                                                                                                                                                                                                                                                                                                           |             |                                                                                                                                                                                                                                                                                                                                                                                                                                                                                                                                                                                                                                                                                                                                                                                                                                                                                                                                                                                                         |          |

|  |                  |          |      |      |                                                        |                                                                                                                                                                                                                                                                                                                                  |         |                                                                                                                                                                                                          |       |
|--|------------------|----------|------|------|--------------------------------------------------------|----------------------------------------------------------------------------------------------------------------------------------------------------------------------------------------------------------------------------------------------------------------------------------------------------------------------------------|---------|----------------------------------------------------------------------------------------------------------------------------------------------------------------------------------------------------------|-------|
|  | LOC_Os09g12270.1 | OS-00003 | 1.15 | 2.2  | arsenate (Bala) vs untreated root samples (Bala)       | Root samples of rice variety Bala grown for 7 days in hydroponics on phosphate-free nutrient solution containing 0.1mM Mg <sup>2+</sup> and SO <sub>4</sub> <sup>2-</sup> , 0.2mM Ca <sup>2+</sup> and K <sup>+</sup> , 0.6mM NO <sub>3</sub> <sup>-</sup> , and 1ppm (13.3μM) arsenate (Na <sub>2</sub> HAsO <sub>4</sub> ).    | Bala    | Improved indica upland cultivar; origin: Eastern India.                                                                                                                                                  | roots |
|  |                  |          | 1.33 | 2.62 | arsenate (Bala) vs untreated root samples (Bala)       | Root samples of rice variety Bala grown for 7 days in hydroponics on phosphate-free nutrient solution containing 0.1mM Mg <sup>2+</sup> and SO <sub>4</sub> <sup>2-</sup> , 0.2mM Ca <sup>2+</sup> and K <sup>+</sup> , 0.6mM NO <sub>3</sub> <sup>-</sup> , and 1ppm (13.3μM) arsenate (Na <sub>2</sub> HAsO <sub>4</sub> ).    | Bala    | Improved indica upland cultivar; origin: Eastern India.                                                                                                                                                  | roots |
|  |                  |          | 1.24 | 2.37 | arsenate (Azucena) vs untreated root samples (Azucena) | Root samples of rice variety Azucena grown for 7 days in hydroponics on phosphate-free nutrient solution containing 0.1mM Mg <sup>2+</sup> and SO <sub>4</sub> <sup>2-</sup> , 0.2mM Ca <sup>2+</sup> and K <sup>+</sup> , 0.6mM NO <sub>3</sub> <sup>-</sup> , and 1ppm (13.3μM) arsenate (Na <sub>2</sub> HAsO <sub>4</sub> ). | Azucena | Traditional japonica ( <i>Oryza sativa</i> ssp. japonica) upland cultivar; origin: the Philippines. Azucena is resistant to aluminum stress (Al <sup>3+</sup> ) (Arbelaez et al., 2017, Plant Direct 1). | roots |

|          |       |       |                                                                                 |                                                                                                                                                                                                                                                                                                                                                                                                                                                                                                                                                                             |            |                                                                                                                                                                                                                                                                                                                                                                                                                                                                                                                                                                                                                                                                                                                                                                                                                                                                                                                                                                                                                                                                                                                                                                                                                                                                                                                                                                                                                                                                                                                    |       |
|----------|-------|-------|---------------------------------------------------------------------------------|-----------------------------------------------------------------------------------------------------------------------------------------------------------------------------------------------------------------------------------------------------------------------------------------------------------------------------------------------------------------------------------------------------------------------------------------------------------------------------------------------------------------------------------------------------------------------------|------------|--------------------------------------------------------------------------------------------------------------------------------------------------------------------------------------------------------------------------------------------------------------------------------------------------------------------------------------------------------------------------------------------------------------------------------------------------------------------------------------------------------------------------------------------------------------------------------------------------------------------------------------------------------------------------------------------------------------------------------------------------------------------------------------------------------------------------------------------------------------------------------------------------------------------------------------------------------------------------------------------------------------------------------------------------------------------------------------------------------------------------------------------------------------------------------------------------------------------------------------------------------------------------------------------------------------------------------------------------------------------------------------------------------------------------------------------------------------------------------------------------------------------|-------|
| OS-00036 | 1.25  | 2.38  | iron (no Fe for 10d; root) vs untreated root samples (sufficient Fe and P)      | Root samples of cultivar Nipponbare germinated for 2 days in distilled water and then floated for 10 days on the Yoshida nutrient solution (Yoshida et al., 1976, Laboratory Manual for Physiological Studies of Rice, Ed 3. International Rice Research Institute, Manila, The Philippines) with optimal phosphorus (0.323mM NaH <sub>2</sub> PO <sub>4</sub> ) concentration but lacking iron (FeCl <sub>3</sub> ) and citric acid. Other growth conditions: growth chamber, 12h light (450μmol photons m <sup>-2</sup> s <sup>-1</sup> ) at 30°C / 12h darkness at 22°C. | Nipponbare | Japonica ( <i>Oryza sativa</i> ssp. japonica) variety resistant to infection by the plant <i>Striga hermonthica</i> , an obligate root hemiparasite (Swarbrick et al., 2008, <i>New Phytol.</i> 179: 515-529). Nipponbare is susceptible to <i>Xanthomonas oryzae</i> pv. <i>oryzae</i> strains BAI3 (from Burkina Faso), PXO99A (from the Philippines; race 6), PXO86 (from the Philippines; race 2), T7174 (from Japan; race 1), and MAI1 (from Mali). Nipponbare is well transformable with <i>Agrobacterium tumefaciens</i> : using <i>A. tumefaciens</i> strain EHA 105, transient transformation frequency has been found to be 85.2%, stable transformation frequency 53.52% (Tie et al., 2012, <i>Plant Mol. Biol.</i> 78: 1-18). Nipponbare is susceptible to <i>Meloidogyne graminicola</i> , a root knot nematode that induces re-differentiation of root cells into multinucleate giant cells and formation of hook-like galls. Nipponbare is susceptible to <i>Magnaporthe oryzae</i> isolate FR13 (virulent isolate from France) and resistant to <i>M. oryzae</i> isolates CL3.6.7 (avirulent isolate) and BR32 (nonadapted isolate from Brazil) (Abbruscato et al., 2012, <i>Mol Plant Pathol.</i> ; Faivre-Rampant et al., 2008, <i>New Phytol.</i> 180: 899-910). This variety is sensitive to drought stress; drought index 0.54 (Wei et al., 2017, <i>Front Plant Sci.</i> 8: 473). Nipponbare is susceptible to Rice Stripe Virus (RSV) (Zhao et al., 2016, <i>New Phytol.</i> 210: 196-207). | roots |
| OS-00096 | -1.22 | -2.33 | phosphorus (IR64-null; no P fertilizer) vs phosphorus (IR64-null; 60kg/ha P2O5) | Root samples of IR64-null line grown till the heading stage on phosphorus-deficient soil from Siniloan, Luzon, the Philippines (P-Bray, 1.23 ± 0.30mgkg <sup>-1</sup> ; P-Olsen, 0.77 ± 0.46 mgkg <sup>-1</sup> ) under dry-down conditions.                                                                                                                                                                                                                                                                                                                                | IR64-null  | Non-transgenic, phosphorus-starvation-intolerant line from the segregating progeny of a transformant heterozygous for the 35S::PSTOL1 transgene; sibling of the transgenic 35S::PSTOL1 (20) line.                                                                                                                                                                                                                                                                                                                                                                                                                                                                                                                                                                                                                                                                                                                                                                                                                                                                                                                                                                                                                                                                                                                                                                                                                                                                                                                  | roots |

LOC\_Os09g12290.1

|          |       |       |                                                                                 |                                                                                                                                                                                                                                                                                                                                                                                                                                                                                                                   |       |                                                                                                                                                                                                                                                                                                                                                                                                                                                                                                                                                                                                                                                                                                                                                                                                                                                                                                                                                                                                        |       |
|----------|-------|-------|---------------------------------------------------------------------------------|-------------------------------------------------------------------------------------------------------------------------------------------------------------------------------------------------------------------------------------------------------------------------------------------------------------------------------------------------------------------------------------------------------------------------------------------------------------------------------------------------------------------|-------|--------------------------------------------------------------------------------------------------------------------------------------------------------------------------------------------------------------------------------------------------------------------------------------------------------------------------------------------------------------------------------------------------------------------------------------------------------------------------------------------------------------------------------------------------------------------------------------------------------------------------------------------------------------------------------------------------------------------------------------------------------------------------------------------------------------------------------------------------------------------------------------------------------------------------------------------------------------------------------------------------------|-------|
| OS-00239 | -1.49 | -2.85 | phosphorus (Dular; 1μM Pi; shoot) vs phosphorus (Pusa Basmati 1; 1μM Pi; shoot) | Shoot samples of 15-day-old Dular seedlings grown in a phosphate deficient nutrient solution (1μM Pi); the solution (pH 5.5) was exchanged every 24h. Other growth conditions: growth chamber, 16h light (250-300μmol photons m <sup>-2</sup> s <sup>-1</sup> ) at 30°C / 8h darkness at 28°C cycles, 70% relative humidity. The nutrient solution as described in (Yoshida et al., 1976, Laboratory Manual for Physiological Studies of Rice, Ed 3, International Rice Research Institute, Manila, Philippines). | Dular | Traditional <i>Oryza sativa</i> ssp. indica variety with very low yield potential (7-22q/ha) and high tolerance to low phosphate (Pi) content in the soil. Dular is more efficient in Pi utilization and better preserves root growth under Pi-limiting conditions than a low Pi-sensitive variety, Pusa Basmati 1. When plants were grown under low Pi (1μM) for 15 days, Dular root length was 9.38 ± 0.17cm while Pusa Basmati 1 root length was 7.41 ± 0.15cm. Under low Pi, Dular produced more and longer lateral roots than Pusa Basmati 1. Even though under sufficient Pi root and shoot Pi content was lower in Dular than in Pusa Basmati 1, under low Pi root and shoot Pi content was higher in Dular than in Pusa Basmati 1 (Mehra et al., 2016, Front Plant Sci. 6: 1184). Dular belongs to wide-compatibility variety (WCV) rice germplasm, i.e. Dular is able to produce fertile hybrids when crossed to indica or japonica varieties (Wang et al., 1998, Theor Appl Genet. 97: 407). | shoot |
|          | -1.49 | -2.81 | phosphorus (Dular; 1μM Pi; root) vs phosphorus (Pusa Basmati 1; 1μM Pi; root)   | Root samples of 15-day-old Dular seedlings grown in a phosphate deficient nutrient solution (1μM Pi); the solution (pH 5.5) was exchanged every 24h. Other growth conditions: growth chamber, 16h light (250-300μmol photons m <sup>-2</sup> s <sup>-1</sup> ) at 30°C / 8h darkness at 28°C cycles, 70% relative humidity. The nutrient solution as described in (Yoshida et al., 1976, Laboratory Manual for Physiological Studies of Rice, Ed 3, International Rice Research Institute, Manila, Philippines).  | Dular | Traditional <i>Oryza sativa</i> ssp. indica variety with very low yield potential (7-22q/ha) and high tolerance to low phosphate (Pi) content in the soil. Dular is more efficient in Pi utilization and better preserves root growth under Pi-limiting conditions than a low Pi-sensitive variety, Pusa Basmati 1. When plants were grown under low Pi (1μM) for 15 days, Dular root length was 9.38 ± 0.17cm while Pusa Basmati 1 root length was 7.41 ± 0.15cm. Under low Pi, Dular produced more and longer lateral roots than Pusa Basmati 1. Even though under sufficient Pi root and shoot Pi content was lower in Dular than in Pusa Basmati 1, under low Pi root and shoot Pi content was higher in Dular than in Pusa Basmati 1 (Mehra et al., 2016, Front Plant Sci. 6: 1184). Dular belongs to wide-compatibility variety (WCV) rice germplasm, i.e. Dular is able to produce fertile hybrids when crossed to indica or japonica varieties (Wang et al., 1998, Theor Appl Genet. 97: 407). | roots |



|  |  |  |       |       |                                                                                     |                                                                                                                                                                                                                                                                                                                                                                                                                                                                                                                      |       |                                                                                                                                                                                                                                                                                                                                                                                                                                                                                                                                                                                                                                                                                                                                                                                                                                                                                                                                                                                                        |       |
|--|--|--|-------|-------|-------------------------------------------------------------------------------------|----------------------------------------------------------------------------------------------------------------------------------------------------------------------------------------------------------------------------------------------------------------------------------------------------------------------------------------------------------------------------------------------------------------------------------------------------------------------------------------------------------------------|-------|--------------------------------------------------------------------------------------------------------------------------------------------------------------------------------------------------------------------------------------------------------------------------------------------------------------------------------------------------------------------------------------------------------------------------------------------------------------------------------------------------------------------------------------------------------------------------------------------------------------------------------------------------------------------------------------------------------------------------------------------------------------------------------------------------------------------------------------------------------------------------------------------------------------------------------------------------------------------------------------------------------|-------|
|  |  |  | -1.46 | -2.7  | phosphorus (Dular; 1μM Pi; root) vs phosphorus (Pusa Basmati 1; 1μM Pi; root)       | Root samples of 15-day-old Dular seedlings grown in a phosphate deficient nutrient solution (1μM Pi); the solution (pH 5.5) was exchanged every 24h. Other growth conditions: growth chamber, 16h light (250-300μmol photons m <sup>-2</sup> s <sup>-1</sup> ) at 30°C / 8h darkness at 28°C cycles, 70% relative humidity. The nutrient solution as described in (Yoshida et al., 1976, Laboratory Manual for Physiological Studies of Rice, Ed 3, International Rice Research Institute, Manila, Philippines).     | Dular | Traditional <i>Oryza sativa</i> ssp. indica variety with very low yield potential (7-22q/ha) and high tolerance to low phosphate (Pi) content in the soil. Dular is more efficient in Pi utilization and better preserves root growth under Pi-limiting conditions than a low Pi-sensitive variety, Pusa Basmati 1. When plants were grown under low Pi (1μM) for 15 days, Dular root length was 9.38 ± 0.17cm while Pusa Basmati 1 root length was 7.41 ± 0.15cm. Under low Pi, Dular produced more and longer lateral roots than Pusa Basmati 1. Even though under sufficient Pi root and shoot Pi content was lower in Dular than in Pusa Basmati 1, under low Pi root and shoot Pi content was higher in Dular than in Pusa Basmati 1 (Mehra et al., 2016, Front Plant Sci. 6: 1184). Dular belongs to wide-compatibility variety (WCV) rice germplasm, i.e. Dular is able to produce fertile hybrids when crossed to indica or japonica varieties (Wang et al., 1998, Theor Appl Genet. 97: 407). | roots |
|  |  |  | -1.52 | -2.91 | phosphorus (Dular; 320μM Pi; shoot) vs phosphorus (Pusa Basmati 1; 320μM Pi; shoot) | Shoot samples of 15-day-old Dular seedlings grown in a phosphate sufficient nutrient solution (320μM Pi); the solution (pH 5.5) was exchanged every 24h. Other growth conditions: growth chamber, 16h light (250-300μmol photons m <sup>-2</sup> s <sup>-1</sup> ) at 30°C / 8h darkness at 28°C cycles, 70% relative humidity. The nutrient solution as described in (Yoshida et al., 1976, Laboratory Manual for Physiological Studies of Rice, Ed 3, International Rice Research Institute, Manila, Philippines). | Dular | Traditional <i>Oryza sativa</i> ssp. indica variety with very low yield potential (7-22q/ha) and high tolerance to low phosphate (Pi) content in the soil. Dular is more efficient in Pi utilization and better preserves root growth under Pi-limiting conditions than a low Pi-sensitive variety, Pusa Basmati 1. When plants were grown under low Pi (1μM) for 15 days, Dular root length was 9.38 ± 0.17cm while Pusa Basmati 1 root length was 7.41 ± 0.15cm. Under low Pi, Dular produced more and longer lateral roots than Pusa Basmati 1. Even though under sufficient Pi root and shoot Pi content was lower in Dular than in Pusa Basmati 1, under low Pi root and shoot Pi content was higher in Dular than in Pusa Basmati 1 (Mehra et al., 2016, Front Plant Sci. 6: 1184). Dular belongs to wide-compatibility variety (WCV) rice germplasm, i.e. Dular is able to produce fertile hybrids when crossed to indica or japonica varieties (Wang et al., 1998, Theor Appl Genet. 97: 407). | shoot |

LOC\_0s10e39520\_1

05-00230

|                 |          |       |       |                                                                                   |                                                                                                                                                                                                                                                                                                                                                                                                                                                                                                                     |       |                                                                                                                                                                                                                                                                                                                                                                                                                                                                                                                                                                                                                                                                                                                                                                                                                                                                                                                                                                                                         |       |
|-----------------|----------|-------|-------|-----------------------------------------------------------------------------------|---------------------------------------------------------------------------------------------------------------------------------------------------------------------------------------------------------------------------------------------------------------------------------------------------------------------------------------------------------------------------------------------------------------------------------------------------------------------------------------------------------------------|-------|---------------------------------------------------------------------------------------------------------------------------------------------------------------------------------------------------------------------------------------------------------------------------------------------------------------------------------------------------------------------------------------------------------------------------------------------------------------------------------------------------------------------------------------------------------------------------------------------------------------------------------------------------------------------------------------------------------------------------------------------------------------------------------------------------------------------------------------------------------------------------------------------------------------------------------------------------------------------------------------------------------|-------|
| LUC_031059920.1 | 03-00239 | -1.58 | -3.01 | phosphorus (Dular; 320µM Pi; root) vs phosphorus (Pusa Basmati 1; 320µM Pi; root) | Root samples of 15-day-old Dular seedlings grown in a phosphate sufficient nutrient solution (320µM Pi); the solution (pH 5.5) was exchanged every 24h. Other growth conditions: growth chamber, 16h light (250-300µmol photons m <sup>-2</sup> s <sup>-1</sup> ) at 30°C / 8h darkness at 28°C cycles, 70% relative humidity. The nutrient solution as described in (Yoshida et al., 1976, Laboratory Manual for Physiological Studies of Rice, Ed 3, International Rice Research Institute, Manila, Philippines). | Dular | Traditional <i>Oryza sativa</i> ssp. indica variety with very low yield potential (7-22q/ha) and high tolerance to low phosphate (Pi) content in the soil. Dular is more efficient in Pi utilization and better preserves root growth under Pi-limiting conditions than a low Pi-sensitive variety, Pusa Basmati 1. When plants were grown under low Pi (1µM) for 15 days, Dular root length was 9.38 ± 0.17cm while Pusa Basmati 1 root length was 7.41 ± 0.15cm. Under low Pi, Dular produced more and longer lateral roots than Pusa Basmati 1. Even though under sufficient Pi root and shoot Pi content was lower in Dular than in Pusa Basmati 1, under low Pi root and shoot Pi content was higher in Dular than in Pusa Basmati 1 (Mehra et al., 2016, Front Plant Sci. 6: 1184). Dular belongs to wide-compatibility variety (WCV) rice germplasms, i.e. Dular is able to produce fertile hybrids when crossed to indica or japonica varieties (Wang et al., 1998, Theor Appl Genet. 97: 407). | roots |
|                 |          | -1.61 | -3.19 | phosphorus (Dular; 1µM Pi; shoot) vs phosphorus (Pusa Basmati 1; 1µM Pi; shoot)   | Shoot samples of 15-day-old Dular seedlings grown in a phosphate deficient nutrient solution (1µM Pi); the solution (pH 5.5) was exchanged every 24h. Other growth conditions: growth chamber, 16h light (250-300µmol photons m <sup>-2</sup> s <sup>-1</sup> ) at 30°C / 8h darkness at 28°C cycles, 70% relative humidity. The nutrient solution as described in (Yoshida et al., 1976, Laboratory Manual for Physiological Studies of Rice, Ed 3, International Rice Research Institute, Manila, Philippines).   | Dular | Traditional <i>Oryza sativa</i> ssp. indica variety with very low yield potential (7-22q/ha) and high tolerance to low phosphate (Pi) content in the soil. Dular is more efficient in Pi utilization and better preserves root growth under Pi-limiting conditions than a low Pi-sensitive variety, Pusa Basmati 1. When plants were grown under low Pi (1µM) for 15 days, Dular root length was 9.38 ± 0.17cm while Pusa Basmati 1 root length was 7.41 ± 0.15cm. Under low Pi, Dular produced more and longer lateral roots than Pusa Basmati 1. Even though under sufficient Pi root and shoot Pi content was lower in Dular than in Pusa Basmati 1, under low Pi root and shoot Pi content was higher in Dular than in Pusa Basmati 1 (Mehra et al., 2016, Front Plant Sci. 6: 1184). Dular belongs to wide-compatibility variety (WCV) rice germplasms, i.e. Dular is able to produce fertile hybrids when crossed to indica or japonica varieties (Wang et al., 1998, Theor Appl Genet. 97: 407). | shoot |

qREP10.17

|  |          |      |      |                                                                                                                           |                                                                                                                                                                                                                                                                                                                                                                                                                                                                                                                           |            |                                                                                                                                                                                                                                                                                                                                                                                                                                                                                                                                                                                                                                                                                                                                                                                                                                                                                                                                                                                                                                                                                                                                                                                                                                                                                                                                                                                                                                                                                                                    |       |
|--|----------|------|------|---------------------------------------------------------------------------------------------------------------------------|---------------------------------------------------------------------------------------------------------------------------------------------------------------------------------------------------------------------------------------------------------------------------------------------------------------------------------------------------------------------------------------------------------------------------------------------------------------------------------------------------------------------------|------------|--------------------------------------------------------------------------------------------------------------------------------------------------------------------------------------------------------------------------------------------------------------------------------------------------------------------------------------------------------------------------------------------------------------------------------------------------------------------------------------------------------------------------------------------------------------------------------------------------------------------------------------------------------------------------------------------------------------------------------------------------------------------------------------------------------------------------------------------------------------------------------------------------------------------------------------------------------------------------------------------------------------------------------------------------------------------------------------------------------------------------------------------------------------------------------------------------------------------------------------------------------------------------------------------------------------------------------------------------------------------------------------------------------------------------------------------------------------------------------------------------------------------|-------|
|  | OS-00036 | 1.62 | 3.06 | iron;<br>phosphorus<br>(no Fe and P<br>for 10d;<br>shoot) vs<br>untreated<br>shoot<br>samples<br>(sufficient<br>Fe and P) | Shoot samples of cultivar Nipponbare germinated for 2 days in distilled water and then floated for 10 days on the Yoshida nutrient solution (Yoshida et al., 1976, Laboratory Manual for Physiological Studies of Rice, Ed 3. International Rice Research Institute, Manila, The Philippines) lacking iron (FeCl <sub>3</sub> ) and phosphorus (NaH <sub>2</sub> PO <sub>4</sub> ). Other growth conditions: growth chamber, 12h light (450μmol photons m <sup>-2</sup> s <sup>-1</sup> ) at 30°C / 12h darkness at 22°C. | Nipponbare | Japonica ( <i>Oryza sativa</i> ssp. japonica) variety resistant to infection by the plant <i>Striga hermonthica</i> , an obligate root hemiparasite (Swarbrick et al., 2008, <i>New Phytol.</i> 179: 515-529). Nipponbare is susceptible to <i>Xanthomonas oryzae</i> pv. <i>oryzae</i> strains BAI3 (from Burkina Faso), PXO99A (from the Philippines; race 6), PXO86 (from the Philippines; race 2), T7174 (from Japan; race 1), and MAI1 (from Mali). Nipponbare is well transformable with <i>Agrobacterium tumefaciens</i> : using <i>A. tumefaciens</i> strain EHA 105, transient transformation frequency has been found to be 85.2%, stable transformation frequency 53.52% (Tie et al., 2012, <i>Plant Mol. Biol.</i> 78: 1-18). Nipponbare is susceptible to <i>Meloidogyne graminicola</i> , a root knot nematode that induces re-differentiation of root cells into multinucleate giant cells and formation of hook-like galls. Nipponbare is susceptible to <i>Magnaporthe oryzae</i> isolate FR13 (virulent isolate from France) and resistant to <i>M. oryzae</i> isolates CL3.6.7 (avirulent isolate) and BR32 (nonadapted isolate from Brazil) (Abbruscato et al., 2012, <i>Mol Plant Pathol.</i> ; Faivre-Rampant et al., 2008, <i>New Phytol.</i> 180: 899-910). This variety is sensitive to drought stress; drought index 0.54 (Wei et al., 2017, <i>Front Plant Sci.</i> 8: 473). Nipponbare is susceptible to Rice Stripe Virus (RSV) (Zhao et al., 2016, <i>New Phytol.</i> 210: 196-207). | shoot |
|  |          | 1.16 | 2.52 | phosphorus<br>(IR64-null;<br>no P<br>fertilizer) vs<br>phosphorus<br>(IR64-null;<br>60kg/ha<br>P2O5)                      | Root samples of IR64-null line grown till the heading stage on phosphorus-deficient soil from Siniloan, Luzon, the Philippines (P-Bray, 1.23 ± 0.30mgkg <sup>-1</sup> ; P-Olsen, 0.77 ± 0.46 mgkg <sup>-1</sup> ) under dry-down conditions.                                                                                                                                                                                                                                                                              | IR64-null  | Non-transgenic, phosphorus-starvation-intolerant line from the segregating progeny of a transformant heterozygous for the 35S::PSTOL1 transgene; sibling of the transgenic 35S::PSTOL1 (20) line.                                                                                                                                                                                                                                                                                                                                                                                                                                                                                                                                                                                                                                                                                                                                                                                                                                                                                                                                                                                                                                                                                                                                                                                                                                                                                                                  | roots |



LOC\_Os10g39540.1

|          |      |      |                                                                                               |                                                                                                                                                                                                                                                                                                                                                                                                                                                                                                                        |                  |                                                                                                                                                                                                                                                                                                                                                                                                                                                                                                                                                                                                                                                                                                                                                                                                                                                                                                                                                                                                                                                                                                                                                                                                                                                                                                                                                                                                               |       |
|----------|------|------|-----------------------------------------------------------------------------------------------|------------------------------------------------------------------------------------------------------------------------------------------------------------------------------------------------------------------------------------------------------------------------------------------------------------------------------------------------------------------------------------------------------------------------------------------------------------------------------------------------------------------------|------------------|---------------------------------------------------------------------------------------------------------------------------------------------------------------------------------------------------------------------------------------------------------------------------------------------------------------------------------------------------------------------------------------------------------------------------------------------------------------------------------------------------------------------------------------------------------------------------------------------------------------------------------------------------------------------------------------------------------------------------------------------------------------------------------------------------------------------------------------------------------------------------------------------------------------------------------------------------------------------------------------------------------------------------------------------------------------------------------------------------------------------------------------------------------------------------------------------------------------------------------------------------------------------------------------------------------------------------------------------------------------------------------------------------------------|-------|
| OS-00096 | 0.92 | 2.04 | phosphorus (35S::PSTOL1 (20); no P fertilizer) vs phosphorus (35S::PSTOL1 (20); 60kg/ha P2O5) | Root samples of 35S::PSTOL1 (20) line grown till the heading stage on phosphorus-deficient soil from Siniloan, Luzon, the Philippines (P-Bray, $1.23 \pm 0.30$ mgkg <sup>-1</sup> ; P-Olsen, $0.77 \pm 0.46$ mgkg <sup>-1</sup> ) under dry-down conditions.                                                                                                                                                                                                                                                           | 35S::PSTOL1 (20) | Phosphorus-starvation-tolerant transgenic line 20 (cv. IR64 background) carrying full-length coding region (CDS) of PSTOL1 under control of the constitutive CaMV35S promoter and NOS terminator. The PSTOL1 CDS is derived from <i>O. sativa indica</i> cultivar Kasalath. PSTOL1 (Phosphorus-starvation tolerance 1; OsPupK46-2) encodes a functional serine/threonine protein kinase and is absent in genomes of phosphorus-starvation-intolerant rice varieties such as IR64, Nipponbare. 35S::PSTOL1 (20) plants grown on phosphorus-unfertilized soil have larger root system and produce approx. 60% more seeds than the control IR64-null plants (segregants without the transgene). Compared to the non-transgenic IR64-null control, total root length and surface area of 35S::PSTOL1 (20) plants is increased not only under low-phosphorus but also under phosphorus-sufficient conditions (Gamuyao et al., 2012, Nature 488: 535-539).                                                                                                                                                                                                                                                                                                                                                                                                                                                          | roots |
|          | 1.16 | 2.21 | phosphorus (no P for 10d; shoot) vs untreated shoot samples (sufficient Fe and P)             | Shoot samples of cultivar Nipponbare germinated for 2 days in distilled water and then floated for 10 days on the Yoshida nutrient solution (Yoshida et al., 1976, Laboratory Manual for Physiological Studies of Rice, Ed 3. International Rice Research Institute, Manila, The Philippines) with optimal iron (0.036mM FeCl3) concentration but lacking phosphorus (NaH2PO4). Other growth conditions: growth chamber, 12h light (450 mmol photons m <sup>-2</sup> s <sup>-1</sup> ) at 30°C / 12h darkness at 22°C. | Nipponbare       | Japonica ( <i>Oryza sativa ssp. japonica</i> ) variety resistant to infection by the plant Striga hermonthica, an obligate root hemiparasite (Swarbrick et al., 2008, New Phytol. 179: 515-529). Nipponbare is susceptible to Xanthomonas oryzae pv. oryzae strains BAI3 (from Burkina Faso), PXO99A (from the Philippines; race 6), PXO86 (from the Philippines; race 2), T7174 (from Japan; race 1), and MAI1 (from Mali). Nipponbare is well transformable with Agrobacterium tumefaciens: using A. tumefaciens strain EHA 105, transient transformation frequency has been found to be 85.2%, stable transformation frequency 53.52% (Tie et al., 2012, Plant Mol. Biol. 78: 1-18). Nipponbare is susceptible to Meloidogyne graminicola, a root knot nematode that induces re-differentiation of root cells into multinucleate giant cells and formation of hook-like galls. Nipponbare is susceptible to Magnaporthe oryzae isolate FR13 (virulent isolate from France) and resistant to M. oryzae isolates CL3.6.7 (avirulent isolate) and BR32 (nonadapted isolate from Brazil) (Abbruscato et al., 2012, Mol Plant Pathol.; Faivre-Rampant et al., 2008, New Phytol. 180: 899-910). This variety is sensitive to drought stress; drought index 0.54 (Wei et al., 2017, Front Plant Sci. 8: 473). Nipponbare is susceptible to Rice Stripe Virus (RSV) (Zhao et al., 2016, New Phytol. 210: 196-207). | shoot |

|                         |          |       |       |                                                                                               |                                                                                                                                                                                                                                                                                                                                                                                                                                                                                                                                                                              |                  |                                                                                                                                                                                                                                                                                                                                                                                                                                                                                                                                                                                                                                                                                                                                                                                                                                                                                                                                                                                                                                                                                                                                                                                                                                                                                                                                                                                                                                                                                                                    |       |
|-------------------------|----------|-------|-------|-----------------------------------------------------------------------------------------------|------------------------------------------------------------------------------------------------------------------------------------------------------------------------------------------------------------------------------------------------------------------------------------------------------------------------------------------------------------------------------------------------------------------------------------------------------------------------------------------------------------------------------------------------------------------------------|------------------|--------------------------------------------------------------------------------------------------------------------------------------------------------------------------------------------------------------------------------------------------------------------------------------------------------------------------------------------------------------------------------------------------------------------------------------------------------------------------------------------------------------------------------------------------------------------------------------------------------------------------------------------------------------------------------------------------------------------------------------------------------------------------------------------------------------------------------------------------------------------------------------------------------------------------------------------------------------------------------------------------------------------------------------------------------------------------------------------------------------------------------------------------------------------------------------------------------------------------------------------------------------------------------------------------------------------------------------------------------------------------------------------------------------------------------------------------------------------------------------------------------------------|-------|
|                         | OS-00036 | -1.49 | -2.78 | iron (no Fe for 10d; shoot) vs iron; phosphorus (no Fe and P for 10d; shoot)                  | Shoot samples of cultivar Nipponbare germinated for 2 days in distilled water and then floated for 10 days on the Yoshida nutrient solution (Yoshida et al., 1976, Laboratory Manual for Physiological Studies of Rice, Ed 3. International Rice Research Institute, Manila, The Philippines) with optimal phosphorus (0.323mM NaH <sub>2</sub> PO <sub>4</sub> ) concentration but lacking iron (FeCl <sub>3</sub> ) and citric acid. Other growth conditions: growth chamber, 12h light (450μmol photons m <sup>-2</sup> s <sup>-1</sup> ) at 30°C / 12h darkness at 22°C. | Nipponbare       | Japonica ( <i>Oryza sativa</i> ssp. japonica) variety resistant to infection by the plant <i>Striga hermonthica</i> , an obligate root hemiparasite (Swarbrick et al., 2008, <i>New Phytol.</i> 179: 515-529). Nipponbare is susceptible to <i>Xanthomonas oryzae</i> pv. <i>oryzae</i> strains BAI3 (from Burkina Faso), PXO99A (from the Philippines; race 6), PXO86 (from the Philippines; race 2), T7174 (from Japan; race 1), and MAI1 (from Mali). Nipponbare is well transformable with <i>Agrobacterium tumefaciens</i> : using <i>A. tumefaciens</i> strain EHA 105, transient transformation frequency has been found to be 85.2%, stable transformation frequency 53.52% (Tie et al., 2012, <i>Plant Mol. Biol.</i> 78: 1-18). Nipponbare is susceptible to <i>Meloidogyne graminicola</i> , a root knot nematode that induces re-differentiation of root cells into multinucleate giant cells and formation of hook-like galls. Nipponbare is susceptible to <i>Magnaporthe oryzae</i> isolate FR13 (virulent isolate from France) and resistant to <i>M. oryzae</i> isolates CL3.6.7 (avirulent isolate) and BR32 (nonadapted isolate from Brazil) (Abbruscato et al., 2012, <i>Mol Plant Pathol.</i> ; Faivre-Rampant et al., 2008, <i>New Phytol.</i> 180: 899-910). This variety is sensitive to drought stress; drought index 0.54 (Wei et al., 2017, <i>Front Plant Sci.</i> 8: 473). Nipponbare is susceptible to Rice Stripe Virus (RSV) (Zhao et al., 2016, <i>New Phytol.</i> 210: 196-207). | shoot |
| <i>LOC_Os10g39550.1</i> |          |       |       |                                                                                               |                                                                                                                                                                                                                                                                                                                                                                                                                                                                                                                                                                              |                  |                                                                                                                                                                                                                                                                                                                                                                                                                                                                                                                                                                                                                                                                                                                                                                                                                                                                                                                                                                                                                                                                                                                                                                                                                                                                                                                                                                                                                                                                                                                    |       |
| <i>LOC_Os10g39560.1</i> | OS-00096 | 1.84  | 3.35  | phosphorus (35S::PSTOL1 (20); no P fertilizer) vs phosphorus (35S::PSTOL1 (20); 60kg/ha P2O5) | Root samples of 35S::PSTOL1 (20) line grown till the heading stage on phosphorus-deficient soil from Siniloan, Luzon, the Philippines (P-Bray, 1.23 ± 0.30mgkg <sup>-1</sup> ; P-Olsen, 0.77 ± 0.46 mgkg <sup>-1</sup> ) under dry-down conditions.                                                                                                                                                                                                                                                                                                                          | 35S::PSTOL1 (20) | Phosphorus-starvation-tolerant transgenic line 20 (cv. IR64 background) carrying full-length coding region (CDS) of PSTOL1 under control of the constitutive CaMV35S promoter and NOS terminator. The PSTOL1 CDS is derived from <i>O. sativa indica</i> cultivar Kasalath. PSTOL1 (Phosphorus-starvation tolerance 1; OsPupK46-2) encodes a functional serine/threonine protein kinase and is absent in genomes of phosphorus-starvation-intolerant rice varieties such as IR64, Nipponbare. 35S::PSTOL1 (20) plants grown on phosphorus-unfertilized soil have larger root system and produce approx. 60% more seeds than the control IR64-null plants (segregants without the transgene). Compared to the non-transgenic IR64-null control, total root length and surface area of 35S::PSTOL1 (20) plants is increased not only under low-phosphorus but also under phosphorus-sufficient conditions (Gamuyao et al., 2012, <i>Nature</i> 488: 535-539).                                                                                                                                                                                                                                                                                                                                                                                                                                                                                                                                                        | roots |

|  |  |          |       |       |                                                                                   |                                                                                                                                                                                                                                                                                                                                                                                                                                                                                                                     |           |                                                                                                                                                                                                                                                                                                                                                                                                                                                                                                                                                                                                                                                                                                                                                                                                                                                                                                                                                                                                                  |       |
|--|--|----------|-------|-------|-----------------------------------------------------------------------------------|---------------------------------------------------------------------------------------------------------------------------------------------------------------------------------------------------------------------------------------------------------------------------------------------------------------------------------------------------------------------------------------------------------------------------------------------------------------------------------------------------------------------|-----------|------------------------------------------------------------------------------------------------------------------------------------------------------------------------------------------------------------------------------------------------------------------------------------------------------------------------------------------------------------------------------------------------------------------------------------------------------------------------------------------------------------------------------------------------------------------------------------------------------------------------------------------------------------------------------------------------------------------------------------------------------------------------------------------------------------------------------------------------------------------------------------------------------------------------------------------------------------------------------------------------------------------|-------|
|  |  |          | 1.48  | 2.75  | phosphorus (IR64-null; no P fertilizer) vs phosphorus (IR64-null; 60kg/ha P2O5)   | Root samples of IR64-null line grown till the heading stage on phosphorus-deficient soil from Siniloan, Luzon, the Philippines (P-Bray, $1.23 \pm 0.30$ mgkg <sup>-1</sup> ; P-Olsen, $0.77 \pm 0.46$ mgkg <sup>-1</sup> ) under dry-down conditions.                                                                                                                                                                                                                                                               | IR64-null | Non-transgenic, phosphorus-starvation-intolerant line from the segregating progeny of a transformant heterozygous for the 35S::PSTOL1 transgene; sibling of the transgenic 35S::PSTOL1 (20) line.                                                                                                                                                                                                                                                                                                                                                                                                                                                                                                                                                                                                                                                                                                                                                                                                                | roots |
|  |  | OS-00239 | -1.06 | -2.08 | phosphorus (Dular; 320μM Pi; root) vs phosphorus (Pusa Basmati 1; 320μM Pi; root) | Root samples of 15-day-old Dular seedlings grown in a phosphate sufficient nutrient solution (320μM Pi); the solution (pH 5.5) was exchanged every 24h. Other growth conditions: growth chamber, 16h light (250-300μmol photons m <sup>-2</sup> s <sup>-1</sup> ) at 30°C / 8h darkness at 28°C cycles, 70% relative humidity. The nutrient solution as described in (Yoshida et al., 1976, Laboratory Manual for Physiological Studies of Rice, Ed 3, International Rice Research Institute, Manila, Philippines). | Dular     | Traditional <i>Oryza sativa</i> ssp. indica variety with very low yield potential (7-22q/ha) and high tolerance to low phosphate (Pi) content in the soil. Dular is more efficient in Pi utilization and better preserves root growth under Pi-limiting conditions than a low Pi-sensitive variety, Pusa Basmati 1. When plants were grown under low Pi (1μM) for 15 days, Dular root length was $9.38 \pm 0.17$ cm while Pusa Basmati 1 root length was $7.41 \pm 0.15$ cm. Under low Pi, Dular produced more and longer lateral roots than Pusa Basmati 1. Even though under sufficient Pi root and shoot Pi content was lower in Dular than in Pusa Basmati 1, under low Pi root and shoot Pi content was higher in Dular than in Pusa Basmati 1 (Mehra et al., 2016, Front Plant Sci. 6: 1184). Dular belongs to wide-compatibility variety (WCV) rice germplasm, i.e. Dular is able to produce fertile hybrids when crossed to indica or japonica varieties (Wang et al., 1998, Theor Appl Genet. 97: 407). | roots |
|  |  | OS-00003 | -1.09 | -2.14 | arsenate (Bala) vs untreated root samples (Bala)                                  | Root samples of rice variety Bala grown for 7 days in hydroponics on phosphate-free nutrient solution containing 0.1mM Mg <sup>2+</sup> and SO <sub>4</sub> <sup>2-</sup> , 0.2mM Ca <sup>2+</sup> and K <sup>+</sup> , 0.6mM NO <sub>3</sub> <sup>-</sup> , and 1ppm (13.3μM) arsenate (Na <sub>2</sub> HAsO <sub>4</sub> ).                                                                                                                                                                                       | Bala      | Improved indica upland cultivar; origin: Eastern India.                                                                                                                                                                                                                                                                                                                                                                                                                                                                                                                                                                                                                                                                                                                                                                                                                                                                                                                                                          | roots |

|          |       |       |                                                                                                 |                                                                                                                                                                                                                                                                                                                                                                                                                                                                                                                                  |       |                                                                                                                                                                                                                                                                                                                                                                                                                                                                                                                                                                                                                                                                                                                                                                                                                                                                                                                                                                                                                       |       |
|----------|-------|-------|-------------------------------------------------------------------------------------------------|----------------------------------------------------------------------------------------------------------------------------------------------------------------------------------------------------------------------------------------------------------------------------------------------------------------------------------------------------------------------------------------------------------------------------------------------------------------------------------------------------------------------------------|-------|-----------------------------------------------------------------------------------------------------------------------------------------------------------------------------------------------------------------------------------------------------------------------------------------------------------------------------------------------------------------------------------------------------------------------------------------------------------------------------------------------------------------------------------------------------------------------------------------------------------------------------------------------------------------------------------------------------------------------------------------------------------------------------------------------------------------------------------------------------------------------------------------------------------------------------------------------------------------------------------------------------------------------|-------|
| OS-00239 | -1.12 | -2.34 | phosphorus (Dular; 320 $\mu$ M Pi; shoot) vs phosphorus (Pusa Basmati 1; 320 $\mu$ M Pi; shoot) | Shoot samples of 15-day-old Dular seedlings grown in a phosphate sufficient nutrient solution (320 $\mu$ M Pi); the solution (pH 5.5) was exchanged every 24h. Other growth conditions: growth chamber, 16h light (250-300 $\mu$ mol photons m <sup>-2</sup> s <sup>-1</sup> ) at 30°C / 8h darkness at 28°C cycles, 70% relative humidity. The nutrient solution as described in (Yoshida et al., 1976, Laboratory Manual for Physiological Studies of Rice, Ed 3, International Rice Research Institute, Manila, Philippines). | Dular | Traditional <i>Oryza sativa</i> ssp. indica variety with very low yield potential (7-22q/ha) and high tolerance to low phosphate (Pi) content in the soil. Dular is more efficient in Pi utilization and better preserves root growth under Pi-limiting conditions than a low Pi-sensitive variety, Pusa Basmati 1. When plants were grown under low Pi (1 $\mu$ M) for 15 days, Dular root length was 9.38 $\pm$ 0.17cm while Pusa Basmati 1 root length was 7.41 $\pm$ 0.15cm. Under low Pi, Dular produced more and longer lateral roots than Pusa Basmati 1. Even though under sufficient Pi root and shoot Pi content was lower in Dular than in Pusa Basmati 1, under low Pi root and shoot Pi content was higher in Dular than in Pusa Basmati 1 (Mehra et al., 2016, Front Plant Sci. 6: 1184). Dular belongs to wide-compatibility variety (WCV) rice germplasms, i.e. Dular is able to produce fertile hybrids when crossed to indica or japonica varieties (Wang et al., 1998, Theor Appl Genet. 97: 407). | shoot |
|----------|-------|-------|-------------------------------------------------------------------------------------------------|----------------------------------------------------------------------------------------------------------------------------------------------------------------------------------------------------------------------------------------------------------------------------------------------------------------------------------------------------------------------------------------------------------------------------------------------------------------------------------------------------------------------------------|-------|-----------------------------------------------------------------------------------------------------------------------------------------------------------------------------------------------------------------------------------------------------------------------------------------------------------------------------------------------------------------------------------------------------------------------------------------------------------------------------------------------------------------------------------------------------------------------------------------------------------------------------------------------------------------------------------------------------------------------------------------------------------------------------------------------------------------------------------------------------------------------------------------------------------------------------------------------------------------------------------------------------------------------|-------|

qRPPUE12.18

LOC\_Os12g29330.1

|          |       |       |                                                                              |                                                                                                                                                                                                                                                                                                                                                                                                                                                                                                                                                                              |            |                                                                                                                                                                                                                                                                                                                                                                                                                                                                                                                                                                                                                                                                                                                                                                                                                                                                                                                                                                                                                                                                                                                                                                                                                                                                                                                                                                                                                                                                                                                    |       |
|----------|-------|-------|------------------------------------------------------------------------------|------------------------------------------------------------------------------------------------------------------------------------------------------------------------------------------------------------------------------------------------------------------------------------------------------------------------------------------------------------------------------------------------------------------------------------------------------------------------------------------------------------------------------------------------------------------------------|------------|--------------------------------------------------------------------------------------------------------------------------------------------------------------------------------------------------------------------------------------------------------------------------------------------------------------------------------------------------------------------------------------------------------------------------------------------------------------------------------------------------------------------------------------------------------------------------------------------------------------------------------------------------------------------------------------------------------------------------------------------------------------------------------------------------------------------------------------------------------------------------------------------------------------------------------------------------------------------------------------------------------------------------------------------------------------------------------------------------------------------------------------------------------------------------------------------------------------------------------------------------------------------------------------------------------------------------------------------------------------------------------------------------------------------------------------------------------------------------------------------------------------------|-------|
| OS-00036 | -1.23 | -2.27 | iron (no Fe for 10d; shoot) vs iron; phosphorus (no Fe and P for 10d; shoot) | Shoot samples of cultivar Nipponbare germinated for 2 days in distilled water and then floated for 10 days on the Yoshida nutrient solution (Yoshida et al., 1976, Laboratory Manual for Physiological Studies of Rice, Ed 3. International Rice Research Institute, Manila, The Philippines) with optimal phosphorus (0.323mM NaH <sub>2</sub> PO <sub>4</sub> ) concentration but lacking iron (FeCl <sub>3</sub> ) and citric acid. Other growth conditions: growth chamber, 12h light (450μmol photons m <sup>-2</sup> s <sup>-1</sup> ) at 30°C / 12h darkness at 22°C. | Nipponbare | Japonica ( <i>Oryza sativa</i> ssp. japonica) variety resistant to infection by the plant <i>Striga hermonthica</i> , an obligate root hemiparasite (Swarbrick et al., 2008, <i>New Phytol.</i> 179: 515-529). Nipponbare is susceptible to <i>Xanthomonas oryzae</i> pv. <i>oryzae</i> strains BAI3 (from Burkina Faso), PXO99A (from the Philippines; race 6), PXO86 (from the Philippines; race 2), T7174 (from Japan; race 1), and MAI1 (from Mali). Nipponbare is well transformable with <i>Agrobacterium tumefaciens</i> : using <i>A. tumefaciens</i> strain EHA 105, transient transformation frequency has been found to be 85.2%, stable transformation frequency 53.52% (Tie et al., 2012, <i>Plant Mol. Biol.</i> 78: 1-18). Nipponbare is susceptible to <i>Meloidogyne graminicola</i> , a root knot nematode that induces re-differentiation of root cells into multinucleate giant cells and formation of hook-like galls. Nipponbare is susceptible to <i>Magnaporthe oryzae</i> isolate FR13 (virulent isolate from France) and resistant to <i>M. oryzae</i> isolates CL3.6.7 (avirulent isolate) and BR32 (nonadapted isolate from Brazil) (Abbruscato et al., 2012, <i>Mol Plant Pathol.</i> ; Faivre-Rampant et al., 2008, <i>New Phytol.</i> 180: 899-910). This variety is sensitive to drought stress; drought index 0.54 (Wei et al., 2017, <i>Front Plant Sci.</i> 8: 473). Nipponbare is susceptible to Rice Stripe Virus (RSV) (Zhao et al., 2016, <i>New Phytol.</i> 210: 196-207). | shoot |
|----------|-------|-------|------------------------------------------------------------------------------|------------------------------------------------------------------------------------------------------------------------------------------------------------------------------------------------------------------------------------------------------------------------------------------------------------------------------------------------------------------------------------------------------------------------------------------------------------------------------------------------------------------------------------------------------------------------------|------------|--------------------------------------------------------------------------------------------------------------------------------------------------------------------------------------------------------------------------------------------------------------------------------------------------------------------------------------------------------------------------------------------------------------------------------------------------------------------------------------------------------------------------------------------------------------------------------------------------------------------------------------------------------------------------------------------------------------------------------------------------------------------------------------------------------------------------------------------------------------------------------------------------------------------------------------------------------------------------------------------------------------------------------------------------------------------------------------------------------------------------------------------------------------------------------------------------------------------------------------------------------------------------------------------------------------------------------------------------------------------------------------------------------------------------------------------------------------------------------------------------------------------|-------|

|          |       |       |                                                                                 |                                                                                                                                                                                                                                                                                                                                                                                                                                                                                                                   |       |                                                                                                                                                                                                                                                                                                                                                                                                                                                                                                                                                                                                                                                                                                                                                                                                                                                                                                                                                                                                         |       |
|----------|-------|-------|---------------------------------------------------------------------------------|-------------------------------------------------------------------------------------------------------------------------------------------------------------------------------------------------------------------------------------------------------------------------------------------------------------------------------------------------------------------------------------------------------------------------------------------------------------------------------------------------------------------|-------|---------------------------------------------------------------------------------------------------------------------------------------------------------------------------------------------------------------------------------------------------------------------------------------------------------------------------------------------------------------------------------------------------------------------------------------------------------------------------------------------------------------------------------------------------------------------------------------------------------------------------------------------------------------------------------------------------------------------------------------------------------------------------------------------------------------------------------------------------------------------------------------------------------------------------------------------------------------------------------------------------------|-------|
| OS-00239 | -1.46 | -2.74 | phosphorus (Dular; 1μM Pi; shoot) vs phosphorus (Pusa Basmati 1; 1μM Pi; shoot) | Shoot samples of 15-day-old Dular seedlings grown in a phosphate deficient nutrient solution (1μM Pi); the solution (pH 5.5) was exchanged every 24h. Other growth conditions: growth chamber, 16h light (250-300μmol photons m <sup>-2</sup> s <sup>-1</sup> ) at 30°C / 8h darkness at 28°C cycles, 70% relative humidity. The nutrient solution as described in (Yoshida et al., 1976, Laboratory Manual for Physiological Studies of Rice, Ed 3, International Rice Research Institute, Manila, Philippines). | Dular | Traditional <i>Oryza sativa</i> ssp. indica variety with very low yield potential (7-22q/ha) and high tolerance to low phosphate (Pi) content in the soil. Dular is more efficient in Pi utilization and better preserves root growth under Pi-limiting conditions than a low Pi-sensitive variety, Pusa Basmati 1. When plants were grown under low Pi (1μM) for 15 days, Dular root length was 9.38 ± 0.17cm while Pusa Basmati 1 root length was 7.41 ± 0.15cm. Under low Pi, Dular produced more and longer lateral roots than Pusa Basmati 1. Even though under sufficient Pi root and shoot Pi content was lower in Dular than in Pusa Basmati 1, under low Pi root and shoot Pi content was higher in Dular than in Pusa Basmati 1 (Mehra et al., 2016, Front Plant Sci. 6: 1184). Dular belongs to wide-compatibility variety (WCV) rice germplasms, i.e. Dular is able to produce fertile hybrids when crossed to indica or japonica varieties (Wang et al., 1998, Theor Appl Genet. 97: 407). | shoot |
|----------|-------|-------|---------------------------------------------------------------------------------|-------------------------------------------------------------------------------------------------------------------------------------------------------------------------------------------------------------------------------------------------------------------------------------------------------------------------------------------------------------------------------------------------------------------------------------------------------------------------------------------------------------------|-------|---------------------------------------------------------------------------------------------------------------------------------------------------------------------------------------------------------------------------------------------------------------------------------------------------------------------------------------------------------------------------------------------------------------------------------------------------------------------------------------------------------------------------------------------------------------------------------------------------------------------------------------------------------------------------------------------------------------------------------------------------------------------------------------------------------------------------------------------------------------------------------------------------------------------------------------------------------------------------------------------------------|-------|

|                  |          |       |       |                                                                              |                                                                                                                                                                                                                                                                                                                                                                                                                                                                                                                                                                              |            |                                                                                                                                                                                                                                                                                                                                                                                                                                                                                                                                                                                                                                                                                                                                                                                                                                                                                                                                                                                                                                                                                                                                                                                                                                                                                                                                                                                                                                                                                                                    |       |
|------------------|----------|-------|-------|------------------------------------------------------------------------------|------------------------------------------------------------------------------------------------------------------------------------------------------------------------------------------------------------------------------------------------------------------------------------------------------------------------------------------------------------------------------------------------------------------------------------------------------------------------------------------------------------------------------------------------------------------------------|------------|--------------------------------------------------------------------------------------------------------------------------------------------------------------------------------------------------------------------------------------------------------------------------------------------------------------------------------------------------------------------------------------------------------------------------------------------------------------------------------------------------------------------------------------------------------------------------------------------------------------------------------------------------------------------------------------------------------------------------------------------------------------------------------------------------------------------------------------------------------------------------------------------------------------------------------------------------------------------------------------------------------------------------------------------------------------------------------------------------------------------------------------------------------------------------------------------------------------------------------------------------------------------------------------------------------------------------------------------------------------------------------------------------------------------------------------------------------------------------------------------------------------------|-------|
|                  | OS-00036 | -1.93 | -3.83 | iron (no Fe for 10d; shoot) vs untreated shoot samples (sufficient Fe and P) | Shoot samples of cultivar Nipponbare germinated for 2 days in distilled water and then floated for 10 days on the Yoshida nutrient solution (Yoshida et al., 1976, Laboratory Manual for Physiological Studies of Rice, Ed 3. International Rice Research Institute, Manila, The Philippines) with optimal phosphorus (0.323mM NaH <sub>2</sub> PO <sub>4</sub> ) concentration but lacking iron (FeCl <sub>3</sub> ) and citric acid. Other growth conditions: growth chamber, 12h light (450μmol photons m <sup>-2</sup> s <sup>-1</sup> ) at 30°C / 12h darkness at 22°C. | Nipponbare | Japonica ( <i>Oryza sativa</i> ssp. japonica) variety resistant to infection by the plant <i>Striga hermonthica</i> , an obligate root hemiparasite (Swarbrick et al., 2008, <i>New Phytol.</i> 179: 515-529). Nipponbare is susceptible to <i>Xanthomonas oryzae</i> pv. <i>oryzae</i> strains BAI3 (from Burkina Faso), PXO99A (from the Philippines; race 6), PXO86 (from the Philippines; race 2), T7174 (from Japan; race 1), and MAI1 (from Mali). Nipponbare is well transformable with <i>Agrobacterium tumefaciens</i> : using <i>A. tumefaciens</i> strain EHA 105, transient transformation frequency has been found to be 85.2%, stable transformation frequency 53.52% (Tie et al., 2012, <i>Plant Mol. Biol.</i> 78: 1-18). Nipponbare is susceptible to <i>Meloidogyne graminicola</i> , a root knot nematode that induces re-differentiation of root cells into multinucleate giant cells and formation of hook-like galls. Nipponbare is susceptible to <i>Magnaporthe oryzae</i> isolate FR13 (virulent isolate from France) and resistant to <i>M. oryzae</i> isolates CL3.6.7 (avirulent isolate) and BR32 (nonadapted isolate from Brazil) (Abbruscato et al., 2012, <i>Mol Plant Pathol.</i> ; Faivre-Rampant et al., 2008, <i>New Phytol.</i> 180: 899-910). This variety is sensitive to drought stress; drought index 0.54 (Wei et al., 2017, <i>Front Plant Sci.</i> 8: 473). Nipponbare is susceptible to Rice Stripe Virus (RSV) (Zhao et al., 2016, <i>New Phytol.</i> 210: 196-207). | shoot |
| LOC_Os12g29350.1 |          |       |       |                                                                              |                                                                                                                                                                                                                                                                                                                                                                                                                                                                                                                                                                              |            |                                                                                                                                                                                                                                                                                                                                                                                                                                                                                                                                                                                                                                                                                                                                                                                                                                                                                                                                                                                                                                                                                                                                                                                                                                                                                                                                                                                                                                                                                                                    |       |
